# Supplementary material for: Linoleic acid promotes TF expression through PPAR-α, which leads to tumor progression in primary pulmonary lymphoepithelioma-like carcinoma
Source: Research Square preprint supplement (doi:10.21203/rs.3.rs-5704972/v1), 2025-01-10
Supplement: Supplementary file 1 [file 0c1a14adba433ac8306647aa.docx]

Table1. Patient characteristics at baseline of pLELC.

| **Patient characteristics**  **at baseline** | **DIA discovery cohort**  ***N* (%)** | **discovery cohort**  ***N* (%)** | **Validation cohort**  ***N* (%)** |
| --- | --- | --- | --- |
| | Age | | --- | | ≤60 | | >60 |   Sex  Male  Female  ECOG performance status  0–1  >1  Treatment line  1  >1  TNM  IIIA-IVA  IVB  Best overall response  PR  SD  PD  ORR  DCR | |  | | --- | | 4 | | 1 | |  | | 1 | | 4 | |  | |  | | 4 | | 1 | |  | | 4 | | 1 | |  | | 2 | | 3 | |  | | 3 | | 2 | | 0 | | 60% | | 100% | | |  | | --- | | 7 | | 3 | |  | | 2 | | 8 | |  | |  | | 9 | | 1 | |  | | 6 | | 4 | |  | | 6 | | 4 | |  | | 4 | | 5 | | 1 | | 40% | | 90% | | |  | | --- | | 17 | | 7 | |  | | 10 | | 14 | |  | |  | | 21 | | 3 | |  | | 13 | | 11 | |  | | 15 | | 9 | |  | | 9 | | 14 | | 1 | | 37.5% | | 95.8% | |
