# Supplementary material for: Linoleic acid promotes TF expression through PPAR-α, which leads to tumor progression in primary pulmonary lymphoepithelioma-like carcinoma
Source: Research Square preprint supplement (doi:10.21203/rs.3.rs-5704972/v1), 2025-01-10
Supplement: Supplementary file 2 [file 111f1b91d0ad4e58f3311c78.xlsx]

## Sheet: Sheet1
Supplementary Table 8.Positive metabolites information the CON and pLELC group.
Index	Formula	Compounds	Class I	Class II	MS_level	score	CAS	CON1	CON2	CON3	CON4	CON5	CON6	CON7	CON8	CON9	CON10	pLELC1	pLELC2	pLELC3	pLELC4	pLELC5	pLELC6	pLELC7	pLELC8	pLELC9	pLELC10	pLELC11	pLELC12	pLELC13	pLELC14	pLELC15	VIP	P-value	Fold_Change	Log2FC	Type
MW0011883	C44H80NO8P	1,2-Dilinoleoyl-sn-glycero-3-phosphocholine	GP	PC	MS2-Search-DB	0.9102	998-06-1	91736.6	867115	1.04885e+06	669734	232013	637734	237389	152235	97601.2	91180.2	76965.9	79426.1	71794.1	116364	98706.7	74786.6	100704	129329	135350	775522	425634	160252	165921	123955	181270	1.03882	0.0848687	0.438883	-1.18809	insig
MEDP0058	C11H20N2O6	L-Saccharopine	Amino acid and Its metabolites	Amino acids	MS2-Search-DB	0.8216	997-68-2	372212	346014	338440	354680	387204	377179	350784	396408	366424	403257	373797	330166	366744	355581	332032	341840	358746	339258	357904	361838	350130	349480	367375	302405	321462	1.25825	0.0195451	0.940395	-0.0886608	insig
MW0004047	C7H6O3	3-Hydroxybenzoic acid	Benzene and substituted derivatives	Benzene and substituted derivatives	MS2-Search-Local	0.5262	99-06-9	7.20316e+06	7.02121e+06	7.08352e+06	7.06429e+06	7.07495e+06	7.24619e+06	6.73333e+06	7.12658e+06	7.00918e+06	7.16107e+06	7.5851e+06	6.69699e+06	6.70206e+06	6.77873e+06	6.53052e+06	6.4741e+06	7.06308e+06	6.46466e+06	6.48238e+06	6.89487e+06	6.87002e+06	6.87159e+06	6.96693e+06	6.42479e+06	6.4194e+06	1.51795	0.00221295	0.954188	-0.0676551	insig
MW0126295	C5H4N2O2	Pyrazine-2-carboxylic acid	Organic acid And Its derivatives	Organic acid And Its derivatives	MS2-Search-DB	0.7099	98-97-5	146982	675912	136870	136555	201599	259545	198516	194222	142128	214890	176113	160268	163153	638582	166396	145036	122575	114383	134517	146354	408382	176432	171133	143809	137814	0.310056	0.63293	0.868274	-0.203777	insig
MW0143464	C11H14O2	4-tert-butylbenzoic acid	Benzene and substituted derivatives	Benzene and substituted derivatives	MS2-Search-Local	0.55	98-73-7	73656.9	59802.4	62450.4	53281.9	55092.9	63054.7	66087.5	67087.1	147956	64448.6	76315.6	100483	75478.1	73586.2	64361.6	82795.6	126215	79734.2	86310.1	65522.9	76992.4	81283.1	60283.9	112506	80496.9	0.928644	0.261757	1.16176	0.216317	insig
MW0011795	C26H54NO6P	1-(1Z-Octadecenyl)-sn-glycero-3-phosphocholine	GP	PC	MS2-Search-DB	0.8522	97802-55-6	34390.2	33823.2	19643.7	11797.2	8832.32	24273.9	18735.8	19303.4	29508.2	29094.3	26896.4	26295.1	16664.1	28564.4	42655.7	42919.1	21875.1	36894.7	27740.2	30349.4	24399	30309.7	20993.9	23613.3	32845.6	1.00218	0.0984606	1.25839	0.331578	insig
MW0011789	C24H50NO6P	1-(1Z-Hexadecenyl)-sn-glycero-3-phosphocholine	GP	PC	MS2-Search-DB	0.8953	97802-53-4	777826	622705	516312	400754	380154	693764	428589	430176	530872	444305	737568	568052	433839	652990	647545	663111	598401	711126	644413	696235	597710	544986	416129	426780	609886	0.843855	0.159397	1.14169	0.19117	insig
MW0054164	C5H6O4	Itaconic acid	Organic acid And Its derivatives	Organic acid And Its derivatives	MS2-Search-DB	0.6982	97-65-4	5.9919e+06	6.17027e+06	5.81952e+06	5.99315e+06	5.91021e+06	6.06251e+06	5.6548e+06	5.76055e+06	5.94855e+06	6.00514e+06	5.98591e+06	5.39686e+06	6.17077e+06	6.01548e+06	5.53948e+06	5.54906e+06	5.95262e+06	5.52281e+06	5.50548e+06	5.68292e+06	5.91288e+06	5.5296e+06	5.75623e+06	5.28461e+06	5.437e+06	1.25263	0.00690151	0.958042	-0.0618387	insig
MEDN0032	C4H6N4O3	Allantoin	Heterocyclic compounds	Heterocyclic compounds	MS2-Search-DB	0.6094	97-59-6	332333	290033	234100	177110	241714	209971	458964	136078	263602	858044	375446	286521	233037	236040	777287	202950	248103	270558	377436	448633	194761	197980	228241	211129	68080.1	0.244651	0.708618	0.90699	-0.140842	insig
MW0011907	C42H80NO8P	1,2-Dioleoyl-sn-glycero-3-phosphoethanolamine-N-methyl	GP	PE	MS2-Search-DB	0.7138	96687-23-9	221084	533865	2.51146e+06	782488	315605	542389	348142	143142	88969.9	277649	112162	261731	165363	154183	375213	187957	678199	259799	172993	1.26053e+06	873232	440896	221798	258807	551961	0.269576	0.472345	0.690956	-0.533335	insig
MW0009611	C19H25ClN2OS	Pyridaben	Benzene and substituted derivatives	Benzene and substituted derivatives	MS2-Search-DB	0.7066	96489-71-3	453159	273344	248784	307201	256900	320989	341971	381933	372112	410081	422836	457943	472149	451985	467030	414468	289250	429558	377482	408891	270720	410651	408558	413855	390542	1.2939	0.0170449	1.2052	0.269275	insig
MEDTP02780	C3H8N2O	1,3-Dimethylurea	Others	Others	MS2-Search-Local	0.7455	96-31-1	2.7068e+06	3.43707e+06	3.01438e+06	3.17471e+06	3.11618e+06	3.36295e+06	2.75174e+06	3.09872e+06	3.18479e+06	2.87687e+06	2.78328e+06	3.07446e+06	3.67367e+06	3.77986e+06	3.13813e+06	2.81263e+06	3.1429e+06	2.95655e+06	2.70896e+06	3.65929e+06	3.2784e+06	2.76026e+06	3.42922e+06	2.52654e+06	2.94426e+06	0.239917	0.759234	1.01263	0.0181082	insig
MW0110037	C13H16O5	Trinexapac-ethyl	Aldehyde,Ketones,Esters	Esters	MS2-Search-DB	0.5424	95266-40-3	24447	19934.8	16088.8	14028.1	16815.9	15826.7	14996.3	19822.1	21431.8	21005.1	16574.6	20263.7	21572.8	21415	19979.1	16947.6	22573	20285.1	18555.4	22272	20600.3	18559	17453.9	16400.2	17477.4	0.623006	0.437977	1.05182	0.0728925	insig
MW0114158	C4H8O4	Threofuranose	Carbohydrates and Its metabolites	Sugars	MS2-Search-DB	0.5996	95-43-2	487751	454954	625524	646700	620377	904143	1.01861e+06	639042	787185	844657	629129	548341	533443	610039	670691	701886	630573	651984	1.05498e+06	671997	622590	302197	660750	705580	701413	0.432176	0.426362	0.919588	-0.120941	insig
MW0055329	C47H93N2O6P	N-Nervonoyl-D-erythro-sphingosylphosphorylcholine	SL	SM	MS2-Search-DB	0.7026	94359-13-4	286386	285167	258739	293728	786110	696618	249601	348681	259319	412927	263294	301196	315727	301064	661709	558035	291689	219693	604698	288782	315809	229990	353492	229501	700643	0.0997171	0.873994	0.968948	-0.0455084	insig
MW0107880	C10H13NO2	L-Homophenylalanine	Amino acid and Its metabolites	Amino acids	MS2-Search-DB	0.7221	943-73-7	776724	791602	829188	782940	770407	858591	801089	758549	790298	869482	845842	821320	826844	717891	750830	772352	755593	702039	693286	766026	753202	669082	738068	705901	719836	1.43612	0.00619886	0.933142	-0.0998315	insig
MW0169684	C17H19NO3	Piperine	Heterocyclic compounds	Heterocyclic compounds	MS2-Search-Local	0.9365	94-62-2	3.33613e+06	400297	119301	9065.61	26198	138696	530525	89339.4	266851	495.936	855491	20254.4	304078	464062	14155	1.65742e+06	72475.1	488.08	7985.97	358587	98217	446503	342579	315120	28464.5	0.119604	0.648599	0.676019	-0.564864	insig
MW0009570	C10H12O3	Propylparaben	Benzene and substituted derivatives	Benzene and substituted derivatives	MS2-Search-DB	0.7209	94-13-3	169669	142310	126112	120052	265306	245296	370257	371846	27838.2	21290.5	549344	225051	136761	934123	85522.1	242737	360782	859034	338881	1.15049e+06	295353	23050.1	720969	550883	263078	1.07865	0.0122411	2.41439	1.27166	up
MW0006242	C9H11NO2	Benzocaine	Benzene and substituted derivatives	Benzene and substituted derivatives	MS2-Search-DB	0.6998	94-09-7	618187	614193	603998	622987	621854	627246	622693	540283	259001	637916	283232	274646	593803	272348	277241	233054	227026	223342	570905	569245	300505	677690	284526	297728	335333	1.60997	0.000601399	0.626478	-0.674664	insig
MW0146341	C31H29N5O4	Asperlicin	Heterocyclic compounds	Heterocyclic compounds	MS2-Insilico	0.6904	93413-04-8	322146	390777	200289	584110	389914	352624	267756	214503	548851	266639	329047	335994	388896	505354	403936	221458	357742	329419	327724	319990	399723	318561	567834	445267	375385	0.500131	0.653905	1.06029	0.0844575	insig
MW0003351	C9H10O	2-Phenylpropanal	Benzene and substituted derivatives	Benzene and substituted derivatives	MS2-Search-DB	0.7163	93-53-8	121170	115262	107330	113585	98437.7	109060	472976	113923	118927	100838	111757	83856.9	151057	186523	114675	117684	119370	124938	131866	118697	130211	136103	120718	122934	133438	0.0142383	0.59449	0.862529	-0.213355	insig
MW0103651	C10H7NO2	Quinoline-2-carboxylic acid	Organic acid And Its derivatives	Organic acid And Its derivatives	MS2-Search-Local	0.5166	93-10-7	295942	60953.8	246444	37412.7	489831	90420	151090	73145.7	80297.4	295458	144474	114655	289744	305002	115078	79238.9	187784	266030	118690	420688	76396.9	295523	289326	422022	183661	0.697704	0.494024	1.21117	0.276406	insig
MW0014460	C6H12O	4-Hexen-1-ol,(E)-	Organic acid And Its derivatives	Organic acid And Its derivatives	MS2-MetDNA	0.616	928-92-7	676782	883610	769238	669460	771371	841051	1.19588e+06	915704	816087	1.17591e+06	1.41173e+06	977188	4.77839e+06	2.85851e+06	1.83356e+06	1.03749e+06	1.48623e+06	805913	746241	790198	719290	1.01216e+06	786422	543460	863254	0.863082	0.104003	1.57964	0.659595	insig
MEDL02176	C10H8O2	6-Methylcoumarin	Heterocyclic compounds	Heterocyclic compounds	MS2-Search-DB	0.6455	92-48-8	3.76565e+06	2.28991e+06	4.04061e+06	3.8692e+06	2.52661e+06	4.48009e+06	4.04634e+06	3.99827e+06	2.14235e+06	5.12178e+06	4.85725e+06	3.48355e+06	3.03061e+06	3.2122e+06	3.63617e+06	2.66731e+06	2.26279e+06	2.88561e+06	1.95149e+06	1.95579e+06	2.26691e+06	2.90631e+06	1.63443e+06	1.93951e+06	1.82975e+06	1.30013	0.0267884	0.744557	-0.425546	insig
MW0012929	C26H55N2O7P	Methylcarbamyl PAF C-16	GP	PC	MS2-Search-DB	0.8472	91575-58-5	948741	574411	676173	414365	656252	674318	845232	1.03442e+06	1.22389e+06	1.14922e+06	692448	1.22034e+06	670500	808109	1.33748e+06	1.19874e+06	1.32559e+06	1.07299e+06	1.15424e+06	1.11704e+06	825450	917572	959986	1.45119e+06	1.33386e+06	1.20997	0.0271758	1.30824	0.38763	insig
MW0151978	C27H27NO	JWH147	Benzene and substituted derivatives	Benzene and substituted derivatives	MS2-Search-DB	0.666	914458-20-1	4.08823e+06	3.64115e+06	3.21787e+06	4.67363e+06	4.57769e+06	4.50186e+06	2.71326e+06	4.0711e+06	4.498e+06	2.22026e+06	3.8781e+06	3.77235e+06	4.18583e+06	5.34149e+06	4.84196e+06	3.66404e+06	3.87434e+06	5.66207e+06	4.34253e+06	4.39532e+06	4.85211e+06	4.64797e+06	4.37524e+06	5.4755e+06	4.17954e+06	1.2467	0.0471365	1.17771	0.235989	insig
MW0132537	C12H14O5	3,4,5-Trimethoxycinnamic Acid	Organic acid And Its derivatives	Organic acid And Its derivatives	MS2-Search-Local	0.7342	90-50-6	238038	181773	133398	120274	234172	226724	363262	353381	31710.4	19762.3	559952	854.556	98538.9	870356	75792.6	214421	330293	760927	277574	1.02899e+06	254143	18703.6	501618	425999	203499	0.341056	0.0528886	1.96992	0.97814	insig
MW0005923	C16H13Cl2NO4	Aceclofenac	Benzene and substituted derivatives	Benzene and substituted derivatives	MS2-Search-DB	0.6402	89796-99-6	1.74249e+06	1.70922e+06	1.68213e+06	1.68837e+06	1.63739e+06	1.6934e+06	1.6009e+06	1.51421e+06	1.45381e+06	1.62705e+06	1.6244e+06	1.39172e+06	1.50258e+06	1.33834e+06	1.24471e+06	1.23846e+06	1.27776e+06	1.06492e+06	1.05981e+06	1.22281e+06	1.24611e+06	1.13202e+06	1.19483e+06	1.01972e+06	1.09645e+06	2.19437	1.53016e-07	0.760686	-0.394627	insig
MEDN0362	C23H46NO7P	LPE(18:1/0:0)	GP	LPE	MS2-Search-Local	0.804	89576-29-4	86964.3	78149.7	123876	83119.8	93891.3	86748.5	136167	79161.3	164075	126193	109370	133095	127569	129730	152635	165627	311639	66666.3	122420	70770.8	85555.8	82493.6	79163.9	107015	85765	0.336269	0.385232	1.15244	0.204687	insig
MW0126398	C7H5NO4	Quinolinic acid	Organic acid And Its derivatives	Organic acid And Its derivatives	MS2-Search-DB	0.8095	89-00-9	652291	1.117e+06	1.21544e+06	1.17068e+06	1.04054e+06	704591	1.11548e+06	1.38926e+06	1.48776e+06	1.48086e+06	615311	1.17386e+06	681211	266247	1.15434e+06	529884	525700	541429	829557	1.06355e+06	767294	1.19994e+06	764145	878060	970664	1.35081	0.00851012	0.701089	-0.512331	insig
MW0009449	C8H6O4	Phthalic acid	Organic acid And Its derivatives	Organic acid And Its derivatives	MS2-Search-DB	0.926	88-99-3	1.68996e+06	1.50584e+06	1.36712e+06	1.40654e+06	1.55273e+06	1.44759e+06	1.52996e+06	1.65545e+06	1.72988e+06	1.89167e+06	1.82754e+06	1.87687e+06	2.01821e+06	2.12994e+06	1.89001e+06	1.77914e+06	1.86769e+06	1.88058e+06	1.81309e+06	1.76833e+06	1.68146e+06	1.75454e+06	1.90039e+06	1.9224e+06	1.81993e+06	2.03246	0.000243813	1.18022	0.239059	insig
MEDN1837	C15H24O2	2,6-Di-tert-butyl-4-(hydroxymethyl)phenol	Benzene and substituted derivatives	Benzene and substituted derivatives	MS2-Search-DB	0.7181	88-26-6	66150.1	157176	134258	50264.5	55804.7	53706.8	61167.5	54369.2	107005	49154.7	53301.3	48131.2	46993.1	61511.4	120503	51690.4	54319.4	49275.8	49376.7	59621.4	102452	48770	60820.4	56032.4	97315.1	0.597042	0.299516	0.811192	-0.301885	insig
MEDN1534	C6H12O6	D-Tagatose	Carbohydrates and Its metabolites	Sugars	MS2-Search-DB	0.8192	87-81-0	565716	771739	841001	608419	438626	326699	649926	644134	636256	669300	517520	557191	766838	848886	639182	487812	367217	696551	471815	613231	405747	559981	919329	621020	687028	0.0127928	0.941922	0.99259	-0.01073	insig
MW0124410	C10H9NO2	Indole-3-acetic acid	Organic acid And Its derivatives	Organic acid And Its derivatives	MS2-MetDNA	0.875	87-51-4	280373	266803	278364	277801	281146	270597	285872	278668	277741	311254	285174	253447	266174	263554	261628	260889	258489	232166	257739	264929	272363	257240	256348	551820	246528	0.207342	0.93633	0.994198	-0.00839417	insig
MW0122107	C5H3ClN4	6-Chloropurine	Heterocyclic compounds	Heterocyclic compounds	MS2-Search-DB	0.6745	87-42-3	1.4478e+06	518553	449581	1.34894e+06	1.20539e+06	466392	1.33274e+06	1.29258e+06	1.30548e+06	1.98155e+06	1.50377e+06	763008	339829	1.0016e+06	1.18905e+06	553908	409587	1.16647e+06	512339	406806	828882	1.30839e+06	1.10266e+06	1.05199e+06	447898	0.816578	0.131614	0.739342	-0.435687	insig
MW0010009	C26H43NO3	Undecanamide,N-cyclopropyl-11-(2-hexyl-5-hydroxyphenoxy)-	Benzene and substituted derivatives	Phenolics	MS2-Search-DB	0.748	869376-90-9	166787	170080	192408	194388	205936	139916	225207	146395	308458	280747	193287	308921	385141	188013	384834	241413	381642	271571	330119	168923	206022	235897	136048	104071	224382	0.653763	0.116227	1.23471	0.304171	insig
MW0012818	C44H82NO7P	1-Hexadecyl-2-(5Z,8Z,11Z,14Z-eicosatetraenoyl)-sn-glycero-3-phosphocholine	GP	PC	MS2-Search-DB	0.7931	86288-11-1	29290.4	25151.2	176966	102703	423677	194139	317736	108826	290285	40560.6	142903	36411.4	42198.2	57531.5	43934.8	31195.1	33997.8	66339.9	157194	48683.4	47397.8	76677.6	385949	70102.2	91535.9	0.896366	0.115508	0.51952	-0.944748	insig
MEDL02687	C15H22NO4+	Feruloylcholine	Alkaloids	Alkaloids	MS2-Search-Local	0.5907	85927-25-9	265027	285634	291085	285019	292149	291998	313772	313139	297359	319990	302161	301733	304916	265764	267240	283450	297478	261755	269356	262451	281540	267206	496502	231395	290817	0.289271	0.843769	0.988947	-0.0160349	insig
MW0150710	C21H32N4O6	HC Toxin	Heterocyclic compounds	Heterocyclic compounds	MS2-Search-DB	0.9022	83209-65-8	2.74001e+06	2.46206e+06	2.53476e+06	3.24495e+06	3.04773e+06	2.83599e+06	1.64801e+06	2.47012e+06	3.0698e+06	1.67308e+06	2.5061e+06	2.58635e+06	2.42609e+06	3.13626e+06	3.60354e+06	2.48812e+06	7.5975e+06	3.48486e+06	2.53403e+06	2.46705e+06	2.91418e+06	3.06033e+06	3.13963e+06	3.15548e+06	2.62337e+06	0.903129	0.118393	1.23667	0.306462	insig
MEDP1810	C9H17NO	2,2,6,6-Tetramethyl-4-piperidinone	Heterocyclic compounds	Heterocyclic compounds	MS2-Search-Local	0.753	826-36-8	242196	232505	377911	160231	244098	135997	391016	239938	131036	386868	135492	277373	143309	151259	382527	141206	145222	368626	142923	142476	139705	382222	150006	396071	416357	0.459023	0.657029	0.921861	-0.117378	insig
MW0011927	C44H88NO8P	PC(18:0/18:0)	GP	PC	MS2-Search-DB	0.9007	816-94-4	311437	52055.4	207329	153117	161022	1.11302e+06	256266	333380	655596	322988	406564	1.06121e+06	584670	263142	220509	457072	137076	542206	553632	68698.6	111766	14174.8	2560.05	3041.59	130836	0.693881	0.67646	0.851914	-0.231221	insig
MW0168524	C6H10O3	4-methyl-2-oxovaleric Acid	Heterocyclic compounds	Heterocyclic compounds	MS2-MetDNA	0.6464	816-66-0	45985.5	51960.5	50603.7	48352.2	99433.7	52707.2	50375.1	48409.4	49648.2	56014.7	53310.2	45133.2	49917	45056.1	92346.3	49870.9	92658.8	46888.9	84636	93094.3	45575.8	51541.4	50832.1	42335	46075.1	0.242918	0.587553	1.07111	0.0991029	insig
MW0126499	C7H5NO3S	Saccharin	Heterocyclic compounds	Heterocyclic compounds	MS2-Search-DB	0.702	81-07-2	611524	1.41882e+06	538821	599363	582658	620766	598873	1.42831e+06	402557	580217	556245	570726	1.40704e+06	1.3574e+06	641399	505134	604282	153862	715578	546074	593266	667222	561251	1.32181e+06	592563	0.0664392	0.901187	0.974802	-0.0368184	insig
MW0003249	C12H15NO3	2-Methylamino-1-(3,4-methylenedioxyphenyl)butan-1-one	Benzene and substituted derivatives	Benzene and substituted derivatives	MS2-Search-DB	0.7302	802575-11-7	1.80994e+06	1.79347e+06	1.78856e+06	1.78189e+06	1.7888e+06	1.8133e+06	1.85906e+06	1.72931e+06	1.83441e+06	1.83696e+06	1.80001e+06	1.68259e+06	1.78843e+06	1.70627e+06	1.5906e+06	1.5944e+06	1.67465e+06	1.47665e+06	1.51567e+06	1.7346e+06	1.81e+06	1.50579e+06	1.76568e+06	1.50237e+06	1.50515e+06	1.66732	0.000171423	0.911262	-0.134063	insig
MW0169093	C9H17NO5	Pantothenic acid	Organic acid And Its derivatives	Organic acid And Its derivatives	MS2-MetDNA	0.5518	79-83-4	1.08106e+06	1.18177e+06	1.37628e+06	1.18078e+06	1.18325e+06	988132	1.49569e+06	1.17221e+06	1.08573e+06	1.71555e+06	1.26377e+06	1.1274e+06	1.2409e+06	1.04627e+06	1.18836e+06	1.3202e+06	1.11385e+06	942186	1.08693e+06	1.20219e+06	1.04821e+06	1.1095e+06	1.23157e+06	835302	1.17289e+06	0.890522	0.151229	0.905774	-0.142777	insig
MW0107126	C2H4O3	Glycolic acid	Organic acid And Its derivatives	Organic acid And Its derivatives	MS2-Insilico	0.5287	79-14-1	1.17354e+06	827599	1.39748e+06	1.13603e+06	1.1718e+06	1.37328e+06	1.99735e+06	1.39791e+06	1.73032e+06	1.49016e+06	1.8979e+06	1.26494e+06	1.01214e+06	1.42157e+06	1.20557e+06	1.63627e+06	408878	975517	1.02396e+06	847672	1.34645e+06	1.473e+06	1.40827e+06	1.42155e+06	1.43015e+06	0.499469	0.405593	0.91387	-0.129939	insig
MW0012935	C25H54NO6P	2-O-methyl PAF C-16	GP	PC	MS2-Search-DB	0.7112	78858-44-3	6.15304e+06	5.40587e+06	4.37734e+06	5.85832e+06	7.29635e+06	6.73185e+06	3.61229e+06	6.02197e+06	6.29748e+06	3.17267e+06	5.053e+06	5.4235e+06	5.78023e+06	7.73695e+06	8.37587e+06	5.48586e+06	1.42032e+07	9.0223e+06	6.65792e+06	6.43174e+06	6.87187e+06	7.021e+06	7.18066e+06	8.93709e+06	6.64733e+06	1.35238	0.0149502	1.34516	0.427774	insig
MW0012934	C26H56NO6P	1-O-Hexadecyl-2-O-ethyl-sn-glycero-3-phosphocholine	GP	PC	MS2-Search-DB	0.6575	78858-42-1	25912.1	13095.7	4906.31	8973.07	13526.1	7894.26	13872.9	27135	28044.4	33331.9	32440.5	55230.9	58978.7	51378	58027.6	60898.1	68246.3	47240.9	37796.1	34507.2	31623.1	35677.9	33311.6	43408.3	28869.8	2.10332	4.40324e-06	2.55675	1.35431	up
MW0013300	C28H48O6	24-Epi-Brassinolide	Heterocyclic compounds	Heterocyclic compounds	MS2-Search-DB	0.7589	78821-43-9	39872.2	18478.9	33481.7	39384.1	22982.7	7093.09	15024.3	39943.8	98365.6	26961.2	34914.1	32035.6	48647.6	92537	69298.4	37206.2	44414.1	93708.3	53916	37357	21220.9	75106.4	99958.4	53213.4	98256.1	1.38165	0.0262329	1.74048	0.799485	insig
MW0168125	H2Se	Hydrogen selenide	Others	Metal, Non-metal and related compounds	MS2-MetDNA	0.5407	7783-07-5	1.11327e+07	3.31557e+06	2.89504e+06	2.9985e+06	2.95338e+06	2.99318e+06	3.56854e+06	2.94525e+06	3.35556e+06	2.76935e+06	3.00728e+06	2.90992e+06	2.60718e+06	8.69179e+06	2.96683e+06	9.91641e+06	8.7967e+06	8.86507e+06	2.59536e+06	2.76728e+06	2.30237e+06	3.06634e+06	9.19427e+06	6.65534e+06	9.62497e+06	0.717065	0.154336	1.43803	0.524089	insig
MW0116986	C21H38N	Cetylpyridinium	Heterocyclic compounds	Pyridine and pyridine derivatives	MS2-Search-DB	0.7329	7773-52-6	16601.2	238138	39008.8	23893.5	50587.3	194992	39563.8	116983	457557	33153.5	32892.1	99714	39113.1	71391.3	306370	84269	186064	27626	206096	58936	23263.3	252559	215870	14267	16087.5	0.0057806	0.816741	0.900206	-0.151674	insig
MW0000166	C20H16N2O4	Camptothecin	Others	Others	MS2-Search-DB	0.7516	7689-03-4	523365	713343	752348	694922	545055	692745	779999	535948	652946	671125	786605	493319	525378	495618	631946	687947	487171	424316	671550	737867	664301	470821	734780	568838	676752	0.688372	0.219497	0.920196	-0.119987	insig
MEDL00101	C18H39NO2	Dihydro-D-sphingosine	SL	SM	MS2-Search-Local	0.8212	764-22-7	3.52409e+06	3.57529e+06	4.08491e+06	6.57411e+06	6.6087e+06	4.83035e+06	3.94819e+06	4.54215e+06	4.12548e+06	4.15543e+06	3.69726e+06	5.35432e+06	4.15761e+06	5.04414e+06	4.00269e+06	3.99105e+06	4.76315e+06	4.50992e+06	3.92878e+06	3.95076e+06	3.52479e+06	3.82295e+06	4.35708e+06	3.66576e+06	4.2968e+06	0.617781	0.322049	0.914637	-0.128728	insig
MW0013540	C7H10O4	2-Isopropylmaleic acid	Organic acid And Its derivatives	Organic acid And Its derivatives	MS2-MetDNA	0.7716	7596-39-6	11332.2	15866.9	12662.5	15090.9	16603.1	16966.5	16711.4	13567.1	15978.9	26908.8	18230	14368.4	12952.1	14493.9	11090	12475.4	17734.8	15039.4	15263.3	14977.4	17054.8	11161.8	15013.4	14767	16638.8	0.585214	0.345809	0.912293	-0.132431	insig
MW0149248	C3H2F4O2	Flupropanate	Organic acid And Its derivatives	Organic acid And Its derivatives	MS2-Insilico	0.5862	756-09-2	4.15141e+06	4.61297e+06	7.86061e+06	7.76908e+06	4.13057e+06	7.70255e+06	7.56384e+06	7.66721e+06	5.07529e+06	7.26548e+06	7.81676e+06	7.3009e+06	3.35066e+06	7.2057e+06	7.75253e+06	4.61626e+06	7.12069e+06	7.19566e+06	5.98852e+06	7.12544e+06	6.86043e+06	7.88203e+06	4.09377e+06	7.73067e+06	6.42629e+06	0.120156	0.776526	1.02892	0.041134	insig
MW0113852	C4H7NO	Acetone cyanohydrin	Aldehyde,Ketones,Esters	Ketones	MS2-MetDNA	0.5384	75-86-5	2.54604e+07	2.61558e+07	2.54954e+07	2.58136e+07	2.57703e+07	2.65578e+07	2.45267e+07	2.5933e+07	2.53206e+07	2.66921e+07	2.70818e+07	2.38664e+07	2.68753e+07	2.67576e+07	2.48372e+07	2.35599e+07	2.60268e+07	2.35987e+07	2.49585e+07	2.54031e+07	2.55516e+07	2.52116e+07	2.61593e+07	2.44436e+07	2.43097e+07	0.674393	0.156611	0.979443	-0.0299665	insig
MW0141050	C2H2Cl2	1,1-Dichloroethylene	Others	Others	MS2-Insilico	0.6883	75-35-4	119863	113538	98631.6	88414.5	119825	417185	876891	127438	107084	102859	381864	828721	151545	316369	306358	23834.6	240374	369951	196667	104681	787722	98140.6	159212	451442	17171.8	0.305541	0.449856	1.36114	0.444819	insig
MW0159355	C2H3Cl	Vinyl chloride	Others	Hydrocarbon derivatives	MS2-Insilico	0.7175	75-01-4	338793	465768	897682	495287	382107	946892	648720	427425	536044	887991	234240	278168	678902	801319	761522	800094	438436	399836	778015	308141	284782	352149	980799	921610	548811	0.230318	0.751805	0.947651	-0.0775724	insig
MW0132598	C17H16O4	3',4'-Dimethoxy-2'-hydroxychalcone	Aldehyde,Ketones,Esters	Ketones	MS2-Search-DB	0.72	7478-65-1	962290	965281	933414	919269	925083	919416	830368	845765	805309	891383	883635	731207	795636	744121	632432	632600	727764	560630	565334	648851	695104	581967	645910	539024	564702	2.19608	1.06107e-07	0.737155	-0.43996	insig
MW0124110	C11H6Cl2N2	Fenpiclonil	Others	Medicine	MS2-Search-DB	0.8356	74738-17-3	509050	547999	629654	643472	667215	618309	619821	792078	569484	776069	696766	528748	733224	659354	559467	563866	581580	560394	717858	689466	611908	622468	781909	566400	627003	0.0198822	0.910765	0.993795	-0.0089792	insig
MEDP0537	C26H54NO7P	LPC(O-16:0/2:0)	GP	LPC	MS2-Search-Local	0.9094	74389-68-7	1.3558e+06	973354	1.01006e+06	895511	913710	1.14164e+06	1.29284e+06	1.09193e+06	1.53052e+06	1.1452e+06	1.22752e+06	1.18468e+06	1.25959e+06	1.00186e+06	1.97038e+06	3.08225e+06	1.63069e+06	1.92817e+06	1.67658e+06	1.38038e+06	1.70474e+06	1.33697e+06	1.22815e+06	1.36055e+06	1.79314e+06	1.49245	0.00597751	1.39586	0.481151	insig
MW0109045	C9H10ClNO2	P-chlorophenylalanine	Amino acid and Its metabolites	Amino acids	MS2-Search-DB	0.8921	7424-00-2	2.11035e+07	2.06801e+07	2.08262e+07	2.07749e+07	2.07832e+07	2.13322e+07	1.99702e+07	2.08446e+07	2.05107e+07	2.10499e+07	2.22123e+07	1.96596e+07	1.87522e+07	1.89367e+07	1.93045e+07	1.91029e+07	2.08252e+07	1.88711e+07	1.91105e+07	2.02652e+07	2.01823e+07	2.02811e+07	2.04851e+07	1.90731e+07	1.89528e+07	1.63084	0.00110654	0.949333	-0.0750134	insig
MEDN0024	C9H10ClNO3	3-Chloro-L-Tyrosine	Amino acid and Its metabolites	Amino acid derivatives	MS2-Search-DB	0.8157	7423-93-0	1.01027e+06	989330	953784	951359	960356	981278	913897	870568	862740	954058	942849	835698	886827	828367	751636	749914	769144	676673	681792	744605	758511	713169	734294	641333	682166	2.16519	4.04297e-07	0.80422	-0.314337	insig
MW0007385	C18H24I3N3O8	Iopromide	Benzene and substituted derivatives	Benzene and substituted derivatives	MS2-Search-DB	0.6561	73334-07-3	17547.9	16973.2	18718.5	18836.3	19432.5	20426.8	19354.7	18189.2	20651	18503.8	19000.9	20388.5	17727.4	17710.8	18747.8	19041.8	17760.9	19314.9	18818.1	17916.4	17651.9	18804.1	18072.2	18960.6	18743.4	0.507481	0.50357	0.984835	-0.0220459	insig
MW0107895	C6H13NO2	L-Isoleucine	Amino acid and Its metabolites	Amino acids	MS2-Search-Local	0.9106	73-32-5	5.24846e+06	7.10567e+06	4.61866e+06	4.93551e+06	6.10838e+06	5.35841e+06	5.17265e+06	5.43355e+06	7.5231e+06	4.27249e+06	5.02411e+06	6.51454e+06	5.69784e+06	6.21441e+06	5.8476e+06	4.31489e+06	3.35593e+06	3.70382e+06	2.30073e+06	7.61e+06	4.5538e+06	3.86328e+06	5.49433e+06	2.47591e+06	2.89875e+06	0.90925	0.0921439	0.835112	-0.259958	insig
MEDN0208	C13H16N2O2	Melatonin	Hormones and hormone related compounds	Hormones and hormone related compounds	MS2-Search-Local	0.764	73-31-4	179434	202053	133773	168198	133340	336276	158293	188845	225327	91985.8	191405	345713	81285.8	161992	330881	257833	104438	215231	231438	89921.2	104326	205814	179418	7637.31	70638.2	0.54139	0.764734	0.945598	-0.0807015	insig
MW0139584	C46H62N4O11	Rifabutin	Benzene and substituted derivatives	Benzene and substituted derivatives	MS2-Insilico	0.5588	72559-06-9	1.78862e+06	1.60217e+06	1.30316e+06	1.88916e+06	1.9444e+06	1.96223e+06	1.06933e+06	1.67855e+06	1.96296e+06	828905	1.73353e+06	1.71071e+06	1.8623e+06	2.27446e+06	2.01264e+06	1.71319e+06	1.76644e+06	2.44717e+06	1.91927e+06	1.78826e+06	2.1814e+06	2.09672e+06	1.86686e+06	2.26574e+06	1.8254e+06	1.39906	0.023998	1.22541	0.293269	insig
MW0054561	C26H56NO6P	LysoPC(O-18:0)	GP	LPC-O	MS2-MetDNA	0.9774	72490-82-5	5122.59	6170.52	5184.36	2803.28	3963.76	7404.87	6683.5	3672.36	10755.9	7925.24	5337.62	9623.91	5225.57	6542.93	18868.5	12106.6	5683.92	8625.98	7123.78	4883.04	6725.33	7926.76	4326.18	5969.4	12350.4	0.885275	0.102242	1.35508	0.438381	insig
MW0010027	C5H11NO2	L-Valine	Amino acid and Its metabolites	Amino acids	MS2-Search-Local	0.9082	72-18-4	421548	365689	278135	383344	417363	364065	432125	358687	542057	256802	348422	529761	401362	545807	446835	410525	214786	306935	163425	430155	262253	273543	411694	293939	262278	0.468711	0.466914	0.925301	-0.112006	insig
MW0107655	C6H14N4O2	Arginine	Amino acid and Its metabolites	Amino acids	MS2-Search-Local	0.7161	7004-12-8	147112	178190	206175	188900	136926	160151	104556	147337	154242	118149	128802	145356	187287	333180	174234	102737	128979	138715	156413	134287	152917	181460	216137	114125	188378	0.302445	0.521347	1.07368	0.102567	insig
MEDN0562	C9H9NO	Indole-3-carbinol	Heterocyclic compounds	Indole and Its derivatives	MS2-Search-DB	0.7768	700-06-1	2.44999e+06	3.05023e+06	2.42661e+06	2.88158e+06	2.73866e+06	2.57019e+06	2.55955e+06	2.50698e+06	3.34857e+06	2.07085e+06	2.88042e+06	2.90878e+06	3.27094e+06	3.30268e+06	2.57121e+06	3.20588e+06	2.62082e+06	2.65758e+06	2.52506e+06	3.22226e+06	2.41331e+06	2.6651e+06	3.11706e+06	2.07474e+06	2.59341e+06	0.581172	0.349268	1.05324	0.0748312	insig
MEDN0026	C9H10INO3	3-Iodo-L-Tyrosine	Amino acid and Its metabolites	Amino acid derivatives	MS2-Search-DB	0.7	70-78-0	287106	325042	243399	520225	270563	534768	511958	325117	493662	254570	489271	247015	471708	310182	334790	257172	276683	199333	473442	271968	294345	338640	257225	287041	239433	0.710189	0.203705	0.840455	-0.250757	insig
MW0012999	C23H48NO7P	1-Stearoyl-2-hydroxy-sn-glycero-3-phosphoethanolamine	GP	PC	MS2-Search-DB	0.9161	69747-55-3	33951.9	29296.9	42142.2	27016	28992.7	25840.6	46581.3	37991.1	49414.5	61960.9	45610	88693.2	76777.1	39754.8	118870	95410.3	114849	68847	66970.7	77650.8	34370.3	44868.2	44527.6	52321.2	66977.1	1.67165	0.000755602	1.80329	0.85063	insig
MW0004284	C10H14O2	4-(3-Hydroxybutyl)phenol	Benzene and substituted derivatives	Phenolics	MS2-Search-DB	0.7325	69617-84-1	28171.9	1386.56	30688	2990.98	5139.6	497699	1863.38	228221	706.434	4475.31	6383.63	3223.78	172916	12783.2	12098.7	389939	5716.88	1557.19	2289.8	2983.77	3005.85	2272.28	6087.18	3608.72	2112.45	0.23168	0.520372	0.521607	-0.938965	insig
MW0006821	C12H14O4	Diethyl phthalate	Benzene and substituted derivatives	Benzene and substituted derivatives	MS2-Search-DB	0.894	68988-18-1	429941	384132	346028	349296	387476	348271	389115	405734	424850	466942	460585	494892	506673	506162	469868	459098	473116	459148	474515	452170	432427	452885	475112	521967	461219	2.15893	6.31284e-05	1.20384	0.267639	insig
MW0108628	C7H11N3O	N-Acetylhistamine	Alcohol and amines	Amines	MS2-Search-Local	0.7457	673-49-4	5.8543e+06	4.86602e+06	7.67799e+06	8.55298e+06	5.61568e+06	5.11218e+06	2.96981e+06	4.13854e+06	8.12169e+06	3.33596e+06	5.14706e+06	4.00777e+06	4.35255e+06	5.28376e+06	4.84231e+06	4.35398e+06	6.30273e+06	5.15545e+06	4.51755e+06	4.40341e+06	4.207e+06	5.50017e+06	5.10156e+06	4.49604e+06	4.19774e+06	0.619846	0.220695	0.851855	-0.23132	insig
MW0113179	C6H6O3	5-Hydroxymethylfurfural	Aldehyde,Ketones,Esters	Aldehydes	MS2-Search-DB	0.7211	67-47-0	395213	394197	376591	371902	361260	358861	346289	363427	323031	365273	372603	312702	348917	326581	296841	294926	299114	262284	281472	299582	319406	275747	312531	264703	274419	2.05128	3.8781e-06	0.828186	-0.271973	insig
MW0107650	C6H11NO3	L-Allysine	Amino acid and Its metabolites	Amino acids	MS2-MetDNA	0.6593	6665-12-9	287.684	550.493	583.705	380.67	405.588	530.246	266.439	213.909	758.285	177.469	573.794	522.751	461.821	301.223	151.497	309.302	406.604	565.409	270.982	647.014	481.65	665.439	290.905	364.517	132.594	0.0198385	0.938341	0.986163	-0.0201025	insig
MEDP1577	C5H11NO2	L-Norvaline	Amino acid and Its metabolites	Amino acids	MS2-Search-Local	0.7525	6600-40-4	223559	184940	147906	191962	198912	182048	213691	221563	234351	265809	241100	267060	263027	285515	306255	263681	287117	245464	256910	259780	263317	294132	261503	265381	247034	2.11527	0.000142275	1.29387	0.371698	insig
MW0105302	C5H11NO2	5-Aminovaleric Acid	Organic acid And Its derivatives	Organic acid And Its derivatives	MS2-Search-DB	0.7139	660-88-8	5.17682e+06	1.14795e+07	2.47051e+06	5.43551e+06	5.05691e+06	1.93255e+06	4.32082e+06	4.71657e+06	2.83781e+06	4.77932e+06	4.17002e+06	4.82975e+06	5.08111e+06	2.29547e+06	4.16943e+06	2.40252e+06	4.95581e+06	4.6353e+06	4.1986e+06	4.01406e+06	1.37968e+06	4.55361e+06	4.48264e+06	3.92237e+06	4.05073e+06	0.553192	0.340452	0.817888	-0.290024	insig
MW0139443	C11H6O3	Psoralen	Heterocyclic compounds	Heterocyclic compounds	MS2-Search-DB	0.7056	66-97-7	2.18539e+06	2.27681e+06	2.46176e+06	2.22975e+06	3.7184e+06	2.08351e+06	2.40038e+06	3.11894e+06	1.97871e+06	2.02604e+06	1.35515e+06	1.45414e+06	1.56317e+06	1.7731e+06	1.92378e+06	4.00768e+06	1.18974e+06	2.33033e+06	4.77864e+06	1.00027e+06	2.28315e+06	1.97813e+06	1.42097e+06	4.06927e+06	2.03952e+06	0.63887	0.499079	0.903254	-0.146797	insig
MEDP0178	C4H4N2O2	Uracil	Nucleotide And Its metabolites	Nucleotide and Its metabolites	MS2-MetDNA	0.5937	66-22-8	93575.7	88779.6	69920	79421.8	72473.7	89274.9	81475.6	70615.1	85206.9	72093.1	65449	84222.5	58239.2	68912.5	61541.6	71397.4	57753.6	66137.9	44267.5	66672.5	56803.7	57221.5	56482.2	61585.2	54714.6	1.9674	6.56722e-05	0.773425	-0.370666	insig
MEDP1600	C9H12O	4-Propylphenol	Benzene and substituted derivatives	Benzene and substituted derivatives	MS2-Search-Local	0.7158	645-56-7	82046.8	75841.7	64689.2	72097.6	95016.1	92984.4	76117.8	101509	100975	107279	104034	99695.4	94728.9	89252.4	99049.7	98495.5	116408	102021	89141.3	102267	110189	95269.5	88193.2	109894	87845.3	1.36629	0.0321635	1.14096	0.190249	insig
MW0109301	C8H14N2O3	Pro-Ala	Amino acid and Its metabolites	Small Peptide	MS2-Search-Local	0.6859	6422-36-2	1.09414e+06	1.17244e+06	1.0407e+06	1.26479e+06	989277	1.03333e+06	1.15442e+06	1.21707e+06	1.049e+06	1.17238e+06	1.17704e+06	986903	1.23427e+06	1.05442e+06	946787	970311	971785	1.12333e+06	801196	804776	784718	1.05725e+06	1.07405e+06	911581	1.16962e+06	1.23789	0.0214767	0.897906	-0.155364	insig
MW0009382	C8H11N	Phenethylamine	Alcohol and amines	Amines	MS2-Search-DB	0.873	64-04-0	1.27784e+06	1.21063e+06	1.16187e+06	1.24109e+06	1.28909e+06	1.27752e+06	2.97901e+06	1.34371e+06	1.35468e+06	2.60256e+06	2.57311e+06	1.4843e+06	2.78616e+06	1.54439e+06	2.37572e+06	2.52216e+06	2.69839e+06	1.41241e+06	2.46197e+06	1.33196e+06	1.39551e+06	1.42871e+06	1.45901e+06	2.46809e+06	2.43506e+06	1.06912	0.0930056	1.28678	0.363764	insig
MW0122579	C9H6BrN	8-Bromoisoquinoline	Heterocyclic compounds	Heterocyclic compounds	MS2-Search-DB	0.6012	63927-22-0	281571	305264	512940	501637	453841	301213	177324	589783	644459	642370	665439	509928	292903	207877	492005	248125	214030	230209	361798	463191	328015	261343	322573	372947	410362	0.742466	0.20366	0.813342	-0.298067	insig
MW0154105	C10H16N2	N,N,N',N'-Tetramethyl-p-phenylenediamine dihydrochloride	Benzene and substituted derivatives	Benzene and substituted derivatives	MS2-Search-DB	0.5068	637-01-4	2.28537e+07	3.37821e+07	2.22752e+07	2.41408e+07	1.55715e+07	1.94291e+07	2.71147e+07	3.3426e+07	2.66935e+07	3.17595e+07	2.92992e+07	2.86742e+07	2.95384e+07	2.86173e+07	2.68729e+07	3.50207e+07	2.68916e+07	2.80537e+07	2.47999e+07	1.34608e+07	2.58049e+07	2.39648e+07	3.07016e+07	2.35431e+07	2.56359e+07	0.256382	0.65799	1.03971	0.0561767	insig
MW0104853	C4H5NO2S2	2-Thiophenesulfonamide	Alcohol and amines	Amines	MS2-Search-DB	0.6526	6339-87-3	946986	1.12801e+06	1.26798e+06	1.91489e+06	1.21346e+06	563525	1.15564e+06	1.52717e+06	1.29586e+06	1.51719e+06	1.29691e+06	1.26896e+06	1.17581e+06	1.82247e+06	1.3127e+06	1.55503e+06	1.33595e+06	1.24819e+06	1.27855e+06	1.32054e+06	1.31117e+06	1.10283e+06	1.97279e+06	1.45401e+06	1.25517e+06	0.773327	0.341667	1.10188	0.139972	insig
ZINC6920419	C26H54	Hexacosane	Others	Hydrocarbon derivatives	MS2-Search-DB	0.5681	630-01-3	46612.1	34000	24455.4	30208.9	28227.9	33187.2	35845.3	44343.8	22461	79099.1	23696.2	97803.3	32574.9	112950	34847.8	99760.7	68046	25415.7	33016.7	30584.8	42887.1	93247.2	57536.2	31887.8	20062.8	0.697078	0.122174	1.4169	0.502734	insig
MW0109196	C9H11NO2	L-Phenylalanine	Amino acid and Its metabolites	Amino acids	MS2-Search-Local	0.916	63-91-2	376699	415249	339189	922608	463451	483315	600695	385295	454575	349718	373619	506410	786335	664692	481674	448651	313959	467864	360422	526058	730017	413952	719398	542295	612105	0.658223	0.455732	1.10593	0.145266	insig
FDATN01480	C5H11NO2S	L-Methionine	Amino acid and Its metabolites	Amino acids	MS2-Search-Local	0.7868	63-68-3	118561	330354	108567	168494	174270	145618	111786	152481	192793	116854	120027	141894	92016	257693	141207	95576	98453.6	91795.7	91366.2	260460	96201.7	110789	168418	93047.4	111538	0.790439	0.245629	0.811009	-0.30221	insig
MEDP0513	C16H33NO	Hexadecanamide	FA	Others	MS2-Search-Local	0.8254	629-54-9	121496	264369	52572.8	63158.7	124721	132493	60603.4	96621.4	435868	110456	110625	310355	196568	150778	254868	342612	166156	141008	377416	188294	219643	109041	180175	890164	100125	1.21298	0.116222	1.70402	0.768939	insig
MW0007126	C13H19NO2S	Fenothiocarb	Benzene and substituted derivatives	Phenolics	MS2-Search-DB	0.7142	62850-32-2	99839.9	111122	107725	115470	112157	106624	110729	117101	109497	130772	100039	76718.6	203789	116920	79729.7	95785.4	110463	106796	105382	104079	111634	125539	131362	90721.8	105979	0.120409	0.892498	0.990117	-0.0143284	insig
MW0106984	C5H6O4	Glutaconic acid	Organic acid And Its derivatives	Organic acid And Its derivatives	MS2-Search-DB	0.6944	628-48-8	238810	214780	215969	254709	419575	456818	224813	201787	253575	207165	261009	501980	138896	396655	233103	456968	151571	70919	70933.8	244387	156570	105093	333133	118350	112939	0.832554	0.339267	0.831475	-0.266256	insig
MW0108767	C4H9NO2	N-Ethylglycine	Amino acid and Its metabolites	Amino acid derivatives	MS2-Search-Local	0.7014	627-01-0	121967	115190	119497	118058	123635	108438	112102	124149	910427	140928	383320	106867	126212	396727	111502	94514.7	126823	108311	118800	139100	120030	603296	99732.5	111882	123398	0.0738333	0.869679	0.926102	-0.110757	insig
MEDP1132	C7H15NO2	3-Carboxypropyltrimethylammonium	Organic acid And Its derivatives	Organic acid And Its derivatives	MS2-Search-Local	0.9107	6249-56-5	200362	206886	189113	235671	218907	176241	187225	245310	171470	198632	190705	175047	171213	272136	301451	155564	54057.4	196799	190911	187935	165915	248590	279099	109847	228863	0.408946	0.677862	0.961706	-0.0563325	insig
MW0119782	C6H8S2	3-Vinyl-1,2-dithiacyclohex-4-ene	Heterocyclic compounds	Heterocyclic compounds	MS2-Search-DB	0.6638	62488-52-2	6.09034e+06	5.9163e+06	5.71188e+06	5.76095e+06	5.19107e+06	5.7823e+06	6.45018e+06	4.98192e+06	4.15846e+06	5.79513e+06	2.51614e+06	5.85769e+06	4.87724e+06	5.46723e+06	2.92917e+06	4.86405e+06	4.0658e+06	4.03233e+06	253086	4.00851e+06	6.44223e+06	6.37525e+06	6.16342e+06	5.84187e+06	6.44113e+06	0.667505	0.084146	0.837356	-0.256086	insig
MW0000001	C3H2O	2-Propynal	Others	Hydrocarbon derivatives	MS2-Insilico	0.6977	624-67-9	273031	4348.31	331167	438416	417081	350984	270536	445486	457155	456265	459047	303012	410083	534010	467595	445310	479062	296061	283708	314306	312185	1933.46	457681	298691	303358	0.100533	0.813618	1.03858	0.0546138	insig
MEDP1754	C6H8O4	Dimethyl Fumarate	Aldehyde,Ketones,Esters	Esters	MS2-Search-Local	0.6255	624-49-7	174824	192630	285841	201490	185332	185247	96716.5	102353	198371	202495	21450.2	384346	195351	105617	203951	185859	202646	200184	202946	205607	203949	209571	208276	112822	212489	0.0698753	0.766239	1.04278	0.0604294	insig
MW0053722	C21H38O6	Glycerol trihexanoate	GL	TG	MS2-Search-DB	0.8296	621-70-5	43458.3	42259.8	43994.1	35037.3	40749.2	33636.2	35795.6	44563.1	36368.8	45316.4	42853.1	39262.9	42404.9	40789	35354.4	49121.4	37277.5	35933	35528	36415	39610.8	35673	44904.2	43812.7	38676.6	0.0633412	0.876903	0.993101	-0.00998825	insig
MW0109847	CH4N2S	Thiourea	Alcohol and amines	Polyamines	MS2-Search-DB	0.6993	62-56-6	3.4353e+06	3.5979e+06	3.14832e+06	3.23596e+06	2.32813e+06	1.88699e+06	489825	2.97765e+06	88275.2	1.61375e+06	3.34885e+06	1.51753e+06	2.2607e+06	1.80811e+06	1.56614e+06	1.40466e+06	2.19852e+06	2.01603e+06	3.04747e+06	1.22118e+06	1.76536e+06	560595	1.84427e+06	1.93107e+06	2.01477e+06	0.115273	0.392955	0.833411	-0.2629	insig
MEDP0545	C4H7NO	2-Pyrrolidinone	Heterocyclic compounds	Heterocyclic compounds	MS2-Search-DB	0.6328	616-45-5	371090	143372	137415	180698	126394	128782	153959	171954	134618	153419	121073	154696	147359	125332	154456	141730	128693	208071	109149	109192	147497	151578	151112	156833	137929	0.784488	0.280103	0.840217	-0.251166	insig
MW0006848	C15H21NOS	Dimepiperate	Benzene and substituted derivatives	Benzene and substituted derivatives	MS2-Search-DB	0.6701	61432-55-1	1.69886e+06	1.65113e+06	1.63714e+06	1.60726e+06	1.5948e+06	1.63184e+06	1.54215e+06	1.4492e+06	1.40603e+06	1.57302e+06	1.57548e+06	1.35243e+06	1.4441e+06	1.30471e+06	1.18756e+06	1.19316e+06	1.23318e+06	1.02243e+06	1.01915e+06	1.1719e+06	1.21762e+06	1.08531e+06	1.1454e+06	982925	1.03937e+06	2.17745	2.15807e-07	0.758839	-0.398134	insig
MW0168512	C9H8O3	2-Hydroxycinnamic acid	Benzene and substituted derivatives	Phenolic acids	MS2-Search-Local	0.8123	614-60-8	962147	1.2086e+06	1.09693e+06	943358	1.0645e+06	792265	741241	1.0971e+06	1.25397e+06	647976	740275	1.17941e+06	669723	1.18838e+06	778583	559969	434246	508895	357047	1.56471e+06	647463	688453	1.03428e+06	428034	631204	1.11103	0.0538411	0.775596	-0.366623	insig
MW0127040	C6H11NO2	beta-Homoproline	Heterocyclic compounds	Heterocyclic compounds	MS2-MetDNA	0.8523	61350-65-0	495309	523602	226032	328629	419497	458713	349868	361811	583815	318189	563905	625079	351626	763959	685490	681976	167751	295630	221113	816894	318553	522523	301135	565484	651107	0.483703	0.149424	1.23516	0.304694	insig
MW0107215	C5H9N3O4	Guanidinosuccinic acid	Organic acid And Its derivatives	Organic acid And Its derivatives	MS2-Search-DB	0.6282	6133-30-8	765006	1.55593e+06	641689	834294	913701	600294	810080	650018	918770	1.01782e+06	723675	1.48312e+06	631005	683217	553548	734876	696800	659303	841144	837603	783535	822971	779044	843082	800829	0.53837	0.452191	0.909072	-0.137534	insig
MW0120561	C9H7NO	4-Hydroxyquinoline	Heterocyclic compounds	Heterocyclic compounds	MS2-Search-DB	0.941	611-36-9	5.37948e+06	6.58208e+06	5.63377e+06	5.31678e+06	5.61511e+06	6.30468e+06	6.17904e+06	5.55546e+06	6.06014e+06	6.93304e+06	5.58446e+06	5.29472e+06	5.63174e+06	4.87873e+06	4.6183e+06	5.0584e+06	5.02163e+06	4.39239e+06	4.68727e+06	4.86356e+06	5.27458e+06	5.03627e+06	6.7755e+06	5.2657e+06	6.27526e+06	1.47786	0.00648504	0.880446	-0.183693	insig
MW0118634	C6H5NO3	2-Oxo-2,3-dihydro-3-pyridinecarboxylic acid	Organic acid And Its derivatives	Organic acid And Its derivatives	MS2-Search-DB	0.7106	609-71-2	107730	59301.2	123883	106745	23927.4	120620	106352	126032	85687.2	103197	113565	112382	119813	95401.8	110249	102437	102509	85153.7	117846	118655	102716	123761	130280	218214	42846.5	0.700676	0.238082	1.17341	0.230707	insig
MW0113268	C5H12NO7P	5-Phosphoribosylamine	Alcohol and amines	Amines	MS2-MetDNA	0.9206	6062-06-2	309795	157727	287160	323192	269744	294820	312227	297576	210893	337626	363024	265532	236411	244050	293580	312195	232886	259991	175367	162972	105334	325874	186469	109571	206755	1.02759	0.0797033	0.82835	-0.271688	insig
MW0124192	C14H21NO3	Furmecyclox	Heterocyclic compounds	Heterocyclic compounds	MS2-Search-DB	0.6264	60568-05-0	442316	398088	332572	437457	545342	498388	260096	431831	504666	247858	379071	426656	419790	580710	635014	412023	1.28582e+06	665937	465768	482119	500581	520709	533779	648991	476359	1.28079	0.0289476	1.37174	0.456002	insig
MEDL01811	C15H16O3	Batatasin IV	Others	Others	MS2-Search-Local	0.5408	60347-67-3	303484	315889	289633	303182	282678	305890	293069	274985	273301	284353	287847	269901	291738	264086	254558	273121	253775	252048	243479	235273	257850	269838	253572	238993	242408	2.00779	2.39557e-05	0.885821	-0.174912	insig
mws4556_P	C6H14N2O3	5-Hydroxy-DL-lysine	Amino acid and Its metabolites	Amino acid derivatives	MS2-Search-Local	0.6262	6000-08-4	273527	266028	250313	283552	263529	293923	286838	256597	254222	450770	371466	293491	213649	194499	170221	219967	190076	210991	141348	186284	277598	240826	173062	155466	156757	1.61643	0.00628944	0.739926	-0.434548	insig
MW0054784	C4H6N2S	Methimazole	Heterocyclic compounds	Heterocyclic compounds	MS2-Search-DB	0.641	60-56-0	1.81746e+06	1.83061e+06	1.73414e+06	1.80734e+06	1.87626e+06	1.88862e+06	1.84627e+06	1.84818e+06	1.88091e+06	1.87398e+06	1.86897e+06	1.84895e+06	1.86566e+06	1.89518e+06	1.97602e+06	1.93618e+06	1.9236e+06	1.85525e+06	1.93571e+06	1.78244e+06	1.8301e+06	1.82888e+06	1.88922e+06	1.90918e+06	1.89894e+06	1.07502	0.0418493	1.02313	0.0329948	insig
MW0106454	C5H12NO3PS2	Dimethoate	Alcohol and amines	Amines	MS2-Search-DB	0.6411	60-51-5	684656	1.00177e+06	977421	991809	161292	358607	686589	655239	125932	369523	408467	698681	349644	348556	350492	369721	148159	347544	196641	363570	323718	103851	355824	135727	373398	1.12086	0.030734	0.540399	-0.887903	insig
MW0106189	C4H7N3O	Creatinine	Organic acid And Its derivatives	Organic acid And Its derivatives	MS2-MetDNA	0.9686	60-27-5	245714	285211	257791	303069	559501	251757	362293	483202	261645	203096	232433	456457	330298	552208	528987	528311	390974	266109	470783	263157	759280	624402	766362	390826	280459	1.23611	0.0278145	1.41933	0.505208	insig
MW0107691	C5H6N2O4	L-Dihydroorotic acid	Organic acid And Its derivatives	Organic acid And Its derivatives	MS2-Search-DB	0.6804	5988-19-2	155708	772499	389069	200419	703148	748797	381273	680377	719556	166498	170359	34702.8	230956	124389	203190	217610	173457	247696	248297	399042	292682	456963	200434	47309.1	134142	1.37617	0.00793198	0.431294	-1.21326	down
MEDL02339	C4H11O4P	Diethyl hydrogen phosphate	Aldehyde,Ketones,Esters	Esters	MS2-Search-DB	0.7161	598-02-7	357195	403917	317813	431451	395699	410883	443897	299077	402508	451978	435052	486293	452089	376934	440716	351955	428814	344266	423059	342083	402867	1.15913e+06	455417	375721	352672	0.55623	0.256051	1.16272	0.217506	insig
MEDP1218	C11H9NO2	3-Aminonaphthalene-2-carboxylic acid	Benzene and substituted derivatives	Benzene and substituted derivatives	MS2-Search-Local	0.5948	5959-52-4	1.61438e+06	3.11847e+06	1.39636e+06	2.9413e+06	2.61598e+06	1.40391e+06	458234	439931	2.768e+06	320993	2.18814e+06	2.47869e+06	817666	1.43323e+06	476763	2.82589e+06	2.17872e+06	226397	490056	152580	929731	583140	787361	318879	424763	0.843026	0.154746	0.636781	-0.65113	insig
MW0012942	C42H82NO8P	1-Oleoyl-2-palmitoyl-sn-glycero-3-phosphocholine	GP	PC	MS2-Search-DB	0.9049	59491-62-2	55034.6	293891	204606	224561	286598	1.37264e+06	1.26878e+06	913092	368685	336141	330858	414285	279948	152077	190789	32831.7	277529	50717	590576	350120	362194	360187	262054	392663	290099	0.678647	0.144397	0.543063	-0.880809	insig
MW0012960	C46H80NO8P	1-Palmitoyl-2-docosahexaenoyl-sn-glycero-3-phosphocholine	GP	PC	MS2-Search-DB	0.8445	59403-54-2	807541	2.75912e+06	425262	1.42802e+06	637820	316341	213850	169029	118561	142877	96902.2	114850	73444.1	167580	98732.5	230416	214779	470048	261274	181560	292702	274588	186833	272719	231414	1.28469	0.0945618	0.300907	-1.73261	insig
MW0012975	C42H84NO8P	1-Palmitoyl-2-stearoyl-sn-glycero-3-phosphocholine	GP	PC	MS2-Search-DB	0.7085	59403-51-9	382269	135533	239500	250034	83890.2	424683	609356	590554	335371	419495	357363	1.17844e+06	148994	56563	55822.3	57974.8	46732.8	50156.9	249496	68609.4	426463	74527.3	322559	732163	312075	0.955747	0.47819	0.794835	-0.331273	insig
MEDN0615	CH4NO5P	Carbamoyl phosphate	Organic acid And Its derivatives	Phosphoric acids	MS2-MetDNA	0.6086	590-55-6	23587.3	24715.3	21939.2	20135.8	23750.2	24395.8	23878.7	23464.3	26068.7	26340.1	21243.5	26280.2	21504.7	23983.8	22374.7	23003.2	24112.2	24476	23236.5	24957.4	24645.1	25328	24614.9	22736.3	25316.7	0.0218762	0.969587	1.00112	0.00161321	insig
MW0015051	C20H34O6	6-Ketoprostaglandin F1alpha	Hormones and hormone related compounds	Hormones and hormone related compounds	MS2-Search-DB	0.804	58962-34-8	66992.6	61225.2	65529.7	55369.7	62119.6	83447.6	55336.2	51995.5	56135.1	58324.1	59325.5	63518.1	60496.8	52441.4	55468	52347.7	56418.4	52952.4	51765.9	58116.7	74348.9	56864.8	52958.1	58352.2	51023.9	0.824797	0.182222	0.926124	-0.110723	insig
MW0108963	C4H11O3PS	O,O-Diethyl hydrogen thiophosphate	Aldehyde,Ketones,Esters	Esters	MS2-Search-DB	0.8264	5871-17-0	1.32273e+07	4.28791e+06	1.55301e+07	1.15579e+07	1.8254e+07	7.74592e+06	4.27053e+06	7.23444e+06	1.3908e+07	1.3215e+07	1.04129e+07	4.77114e+06	1.01418e+07	3.30397e+06	4.23814e+06	9.67641e+06	1.64227e+07	3.56528e+06	2.89626e+06	1.97924e+07	1.70295e+07	1.19139e+07	1.96124e+07	1.70184e+07	1.70391e+07	0.104732	0.90599	1.02434	0.0346906	insig
MW0168941	C6H6O6	Cis-Aconitic Acid	Organic acid And Its derivatives	Organic acid And Its derivatives	MS2-Insilico	0.5311	585-84-2	97526.3	120951	107501	86438.4	122541	102353	199117	135345	116190	89158.8	120389	168797	90799.8	119810	101360	96528.1	141043	112046	93739.5	95151.8	123561	268716	185894	68415.5	92567.7	0.0860809	0.653124	1.06408	0.0896012	insig
MW0137679	C11H12BrNO	Cinromide	Alcohol and amines	Amines	MS2-Search-DB	0.5866	58473-74-8	125938	181062	167971	134209	132817	143430	200699	143295	216701	150964	237546	162833	165344	182046	188631	202730	198222	216895	215975	244624	208082	232650	218720	203821	257870	1.82283	0.000701643	1.30905	0.388516	insig
MW0120983	C9H10N2	5,6-Dimethylbenzimidazole	Benzene and substituted derivatives	Benzene and substituted derivatives	MS2-Search-Local	0.7344	582-60-5	2.72289e+06	2.85725e+06	2.61155e+06	2.78415e+06	2.86252e+06	2.74592e+06	2.62167e+06	2.79049e+06	2.43764e+06	2.3384e+06	2.48619e+06	2.39842e+06	3.24923e+06	3.00564e+06	2.50308e+06	2.39527e+06	2.76114e+06	2.5491e+06	2.66065e+06	2.53053e+06	3.07043e+06	2.86909e+06	2.85645e+06	2.53001e+06	2.55702e+06	0.217394	0.842591	1.00656	0.00943548	insig
MEDP0160	C10H13N5O4	Adenosine	Nucleotide And Its metabolites	Nucleotide and Its metabolites	MS2-Search-Local	0.9287	58-61-7	3790.23	11197.1	253275	1826.26	57446.6	1009.72	2103.59	2132	3352.58	1191.62	2939.14	484.232	1407.85	2682.51	1741.83	2692.61	2822.1	2926.88	1736.29	1130.65	3910.22	2119.16	5604.79	219548	2788.81	0.518915	0.570307	0.503047	-0.991235	insig
MW0126343	C12H13ClN4	Pyrimethamine	Heterocyclic compounds	Heterocyclic compounds	MS2-Search-DB	0.6299	58-14-0	87759.3	85047.6	72798.5	83267	89029.6	86174.9	90405.9	98091.9	83994.5	95083.9	98737.3	101332	93307.3	100936	107776	108101	113629	106978	113903	95581.5	100552	99133.4	98893.6	101297	97426.8	2.07783	2.40635e-05	1.17599	0.233876	insig
MEDL02259	C8H10N4O2	Caffeine	Heterocyclic compounds	Heterocyclic compounds	MS2-Search-Local	0.8157	58-08-2	26740.6	1.50403e+06	1.8078e+06	283048	9.95593e+06	35194.5	2.2002e+06	520998	2.21853e+06	3.3007e+06	2.52371e+06	2.27221e+06	1.77529e+07	1.91147e+06	3.06608e+06	3.0534e+06	588378	2.3734e+06	2.77518e+06	3.39489e+06	20877.6	84182.8	2.8906e+06	1.47355e+07	358369	0.521312	0.317397	1.76332	0.818292	insig
MW0126353	C11H11NO	Pyroquilon	Aldehyde,Ketones,Esters	Ketones	MS2-Search-DB	0.7371	57369-32-1	584610	605167	592017	553939	588309	624203	561229	555514	566668	614602	565543	603913	573601	567091	564159	529955	542255	485749	489438	537066	524085	467802	522614	520961	522957	1.7032	0.000472657	0.914225	-0.12938	insig
MW0122448	C14H11NO3	7-Ethoxyresorufin	Heterocyclic compounds	Heterocyclic compounds	MS2-Search-DB	0.7134	5725-91-7	98928.4	85064.7	84397.7	105627	100487	98687.8	100916	87189.2	108440	86811.6	106535	103251	95656.3	111152	100316	103473	73426.2	100410	93840.2	92320.5	74267.8	96831.8	112240	128353	103048	0.341775	0.385254	1.04202	0.0593899	insig
MEDL01878	C11H11NO4	Methyl dioxindole-3-acetate	Heterocyclic compounds	Indole and Its derivatives	MS2-Search-Local	0.8265	57061-18-4	923988	1.96071e+06	936499	1.93422e+06	1.9783e+06	1.96871e+06	955134	980462	969355	1.02606e+06	996118	865654	1.01328e+06	1.84974e+06	1.79661e+06	1.86296e+06	1.88529e+06	871242	862859	932298	1.8893e+06	887956	964772	824179	843969	0.327925	0.497572	0.89712	-0.156628	insig
MEDP1243	C10H12N2O	4-Hydroxytryptamine	Tryptamines,Cholines,Pigments	Tryptamines	MS2-Search-Local	0.8677	570-14-9	6.15722	5.59432	100.404	4.55686	4.69147	15.6183	12.3294	16.2744	149.623	3.85272	27.3838	18.174	7610.98	1546.81	7638.15	6719.72	62568.8	7109.04	86156.2	2.4275	5.58372	188.228	5178.86	6.29632	7.39192	1.41806	0.0861276	386.049	8.59264	insig
MW0115178	C3H8O2	Propylene glycol	Alcohol and amines	Alcohols	MS2-Search-DB	0.7476	57-55-6	3.63336e+06	3.0605e+06	8.40336e+06	3.01862e+06	4.14743e+06	5.94988e+06	3.00507e+06	3.32205e+06	2.0451e+07	2.85144e+06	3.4145e+06	3.57101e+06	5.04714e+06	5.17124e+06	3.50334e+06	1.96824e+07	1.93772e+07	3.96987e+06	3.45374e+06	3.69912e+06	4.16075e+06	1.76042e+07	3.69969e+06	2.80176e+06	3.75725e+06	0.318506	0.653258	1.18613	0.24626	insig
MEDP0086	CH4N2O	Urea	Alcohol and amines	Amines	MS2-Search-DB	0.6187	57-13-6	1.13046e+07	6.01441e+06	5.89215e+06	5.40429e+06	6.33486e+06	6.25249e+06	5.42672e+06	4.7738e+06	5.65264e+06	1.17113e+07	5.71773e+06	1.17564e+07	5.9977e+06	1.16476e+07	6.08875e+06	4.86342e+06	2.2547e+06	6.35944e+06	1.03412e+07	5.52095e+06	1.22505e+07	6.1633e+06	5.81163e+06	6.35987e+06	1.22511e+07	0.167392	0.554319	1.09921	0.136466	insig
MEDN0305	C4H9N3O2	Creatine	Organic acid And Its derivatives	Organic acid And Its derivatives	MS2-Search-Local	0.7095	57-00-1	199393	319130	424833	329421	163462	489561	200385	215391	213417	98497.1	368738	412034	69480.9	116449	271684	172068	304250	394369	177466	253361	173794	229142	258695	213087	194747	0.42528	0.600422	0.906822	-0.141108	insig
MW0141122	C44H84NO8P	1,2-Dioleoyl PC	GP	PC	MS2-Search-DB	0.7943	56648-95-4	26139.5	188632	178277	109335	93039.9	497231	373467	23816	630687	501027	354225	34317.5	562044	221123	101286	62503	41506.3	71716.8	700152	53273.1	52835.5	73130.5	84833.4	27869.3	33710.9	0.656974	0.284644	0.629254	-0.668285	insig
MEDP1126	C8H11NO	(R)-(-)-2-phenylglycine	Amino acid and Its metabolites	Amino acid derivatives	MS2-Search-Local	0.9452	56613-80-0	8.45194e+07	9.52247e+07	8.28089e+07	9.07009e+07	8.47205e+07	9.32963e+07	7.99394e+07	8.98449e+07	9.09119e+07	8.69739e+07	8.09843e+07	9.09585e+07	1.00783e+08	1.0104e+08	8.54963e+07	8.08848e+07	8.82003e+07	8.9154e+07	7.67835e+07	1.01354e+08	9.36607e+07	7.94926e+07	9.42509e+07	7.48091e+07	8.14199e+07	0.0808514	0.983687	1.00065	0.000941298	insig
MW0104504	C3H8NO5P	2-Amino-3-phosphonopropionic acid	Organic acid And Its derivatives	Organic acid And Its derivatives	MS2-Search-DB	0.5707	5652-28-8	72661.8	72158	100204	98725.4	104028	166039	65662.2	115807	119975	96458.4	135035	95897.9	99289	99062.4	108057	63867.6	103630	66190.4	86857.2	98946.8	98579.2	125368	92789	82063.9	88236.8	0.210136	0.645451	0.951431	-0.0718294	insig
MW0146998	C2O4Ca	Calcium oxalate	Others	Others	MS2-Insilico	0.7173	563-72-4	1.69184e+06	1.52496e+06	1.52522e+06	1.57263e+06	1.64821e+06	1.7059e+06	703435	1.56638e+06	1.56368e+06	1.39781e+06	1.58285e+06	1.5194e+06	2.22189e+06	1.55244e+06	2.47654e+06	1.09742e+06	1.63935e+06	1.12713e+06	1.69456e+06	1.46315e+06	1.34893e+06	956744	2.46552e+06	962561	831425	0.000878266	0.811758	1.02639	0.0375782	insig
MW0118228	C5H6ClN3	2-Amino-4-chloro-6-methylpyrimidine	Heterocyclic compounds	Heterocyclic compounds	MS2-Search-DB	0.7211	5600-21-5	76730.8	90732.2	80620.2	83696.9	75164.7	83588.8	78208.3	76376.3	77758.5	78181.7	74733.8	78774.3	85803.3	75648.5	78416	86796.3	77645.1	86593.7	75811.2	72492.3	73372.5	77015.3	83531.2	77605.7	73937.9	0.454883	0.432824	0.980517	-0.0283852	insig
MW0125165	C5H6N2OS	Methylthiouracil	Heterocyclic compounds	Heterocyclic compounds	MS2-Search-DB	0.7171	56-04-2	3.67244e+06	4.80809e+06	4.68392e+06	3.98179e+06	3.43783e+06	4.2029e+06	3.90182e+06	4.64091e+06	3.64051e+06	4.05789e+06	4.82492e+06	4.40001e+06	4.12842e+06	4.09409e+06	3.47851e+06	4.70607e+06	3.41968e+06	4.60682e+06	4.83116e+06	1.74459e+06	3.71528e+06	1.63426e+06	9.439e+06	3.7122e+06	4.36642e+06	0.262898	0.829938	1.02534	0.0360991	insig
MW0106144	C7H7Cl3NO3PS	Chlorpyrifos-methyl	Organic acid And Its derivatives	Phosphoric acids	MS2-Search-DB	0.6649	5598-13-0	211722	212218	224133	214366	207117	202512	217968	200557	228685	234533	258139	228979	180901	172283	181355	184192	214017	195381	231575	211850	205914	193072	214076	194341	179352	1.02338	0.0949776	0.942649	-0.0852081	insig
MW0124515	C10H17N3O2	Isouron	Heterocyclic compounds	Heterocyclic compounds	MS2-Search-DB	0.7774	55861-78-4	271183	255005	227223	254937	15431.7	264486	257261	267726	270470	275407	275635	283857	279458	271220	276171	275998	274929	15818.4	256607	268010	273775	268184	256396	267154	266436	0.26616	0.557607	1.07657	0.10644	insig
MW0107967	C9H11NO3	L-Tyrosine	Amino acid and Its metabolites	Amino acids	MS2-Search-Local	0.9406	556-03-6	1.40966e+06	2.04862e+06	1.83961e+06	1.59186e+06	1.82779e+06	1.35176e+06	1.25372e+06	1.51921e+06	2.08598e+06	1.07633e+06	1.27665e+06	2.02497e+06	1.15359e+06	2.03728e+06	1.33658e+06	959872	733187	852382	606106	2.59733e+06	1.08463e+06	1.11502e+06	1.7173e+06	729361	757846	1.03472	0.0834727	0.790697	-0.338803	insig
MEDP1685	C18H39NO3	Phytosphingosine	SL	SPH	MS2-Search-Local	0.7859	554-62-1	8.51523e+06	9.88033e+06	9.36413e+06	9.47194e+06	8.50965e+06	9.61759e+06	1.11075e+07	1.05917e+07	9.88394e+06	1.06612e+07	1.10463e+07	9.91068e+06	1.02935e+07	1.17808e+07	1.01196e+07	9.44085e+06	1.18841e+07	1.05715e+07	9.79568e+06	1.10033e+07	9.64662e+06	8.46406e+06	9.04199e+06	8.55357e+06	8.6745e+06	0.351798	0.524074	1.02611	0.0371819	insig
MW0126866	C7H4Cl3NO3	Triclopyr	Heterocyclic compounds	Heterocyclic compounds	MS2-Search-DB	0.5682	55335-06-3	431665	514434	1.02692e+06	142011	439525	183393	1.24931e+06	431971	1.25951e+06	733407	504522	382507	406908	214733	674310	492049	1.18015e+06	425920	444479	419000	411866	434156	932829	105749	446858	0.398831	0.345835	0.777278	-0.363497	insig
MEDL01977	C9H15NO	9-Methyl-9-azabicyclo[3.3.1]nonan-3-one	Heterocyclic compounds	Heterocyclic compounds	MS2-Search-DB	0.7219	552-70-5	236236	626752	550680	979767	2.27917e+06	206064	666509	1.63415e+06	1.06512e+06	3.20964e+06	318960	325601	262550	1.06897e+06	242028	387756	556413	674566	524826	546931	201750	1.21276e+06	820890	526247	1.10427e+06	0.892871	0.106082	0.510707	-0.969433	insig
MW0048992	C24H40N2	Conessine	Heterocyclic compounds	Heterocyclic compounds	MS2-Search-DB	0.6557	546-06-5	3.10504e+06	3.03697e+06	3.00778e+06	3.14731e+06	3.3972e+06	3.20185e+06	2.97078e+06	3.33103e+06	3.06809e+06	3.58661e+06	3.08344e+06	3.19988e+06	3.37964e+06	3.25756e+06	2.96612e+06	2.66847e+06	3.11112e+06	2.90884e+06	2.83081e+06	3.13366e+06	3.33849e+06	3.01172e+06	3.30658e+06	2.83679e+06	3.12707e+06	0.674193	0.202765	0.96612	-0.0497263	insig
MW0055180	C14H28O2	Myristic acid	FA	Others	MS2-Search-DB	0.7201	544-63-8	778513	2.07008e+06	966569	1.75914e+06	806390	1.04866e+06	1.06439e+06	1.05939e+06	897775	940867	1.23905e+06	994732	2.28165e+06	1.79197e+06	1.4078e+06	888632	1.1862e+06	960103	793093	921063	753480	832575	738173	639480	723520	0.237947	0.730234	0.945215	-0.0812851	insig
MW0013536	C24H48O3	2-Hydroxytetracosanoic acid	Organic acid And Its derivatives	Organic acid And Its derivatives	MS2-Insilico	0.5582	544-57-0	63583.6	55369.3	73064.1	48325.3	55535.6	63102.2	37049.9	60646.9	132409	64804.3	22127.2	152658	19378.4	25590.9	46042.5	84815	63558.1	36235.2	82603.2	45573.2	29451.9	54733.5	34538.9	120032	55499.6	0.715356	0.576154	0.889893	-0.168296	insig
FDATP01719	C8H20ClN	Octodrine (2-Amino-6-methylheptan)	Others	FDA	MS2-Search-Local	0.5773	543-82-8	396057	215602	383718	92131.5	112148	93780.1	114943	371632	94608.8	386769	96284.3	91532.3	379747	188849	105681	103239	186095	173739	80232.6	88303.6	85596.3	104035	88130.5	173156	102974	0.960236	0.0905187	0.603639	-0.728243	insig
MW0114584	C8H19NO	Heptaminol	Alcohol and amines	Alcohols	MS2-Search-DB	0.6067	543-15-7	156835	262924	181246	180514	159822	174674	160354	195665	173617	202504	235149	174778	343488	192976	237365	178350	271289	195252	169845	161434	190417	192568	164774	165495	199919	0.663478	0.226164	1.10853	0.148647	insig
MW0105414	C4H6O3	Acetoacetic acid	Organic acid And Its derivatives	Organic acid And Its derivatives	MS2-Search-DB	0.7143	541-50-4	131893	129418	121089	151196	104573	116171	134219	135878	122231	134419	130003	119379	130889	121653	116177	111706	101245	135819	103709	98673.1	99159.6	136443	130412	109505	147795	0.88971	0.143289	0.932839	-0.100301	insig
MW0111074	C7H15NO3	L-Carnitine	Amino acid and Its metabolites	Amino acids	MS2-Search-DB	0.6283	541-15-1	4.11846e+06	4.20926e+06	4.15059e+06	4.24458e+06	3.87579e+06	3.85816e+06	4.15516e+06	4.25715e+06	4.3425e+06	4.39252e+06	4.159e+06	3.77302e+06	4.15719e+06	3.99508e+06	3.81807e+06	3.93011e+06	4.31754e+06	4.22687e+06	4.24171e+06	4.14056e+06	4.08267e+06	3.98369e+06	4.34579e+06	3.96704e+06	4.45855e+06	0.393346	0.481765	0.987031	-0.0188328	insig
MW0157973	C2H2Cl2	trans-1,2-Dichloroethene	Others	Hydrocarbon derivatives	MS2-Insilico	0.717	540-59-0	870037	872372	811694	873362	851611	883027	876784	879574	866221	884338	919351	905318	920784	889055	876514	893241	911344	889184	901643	842800	906683	885081	863677	894481	884428	1.3899	0.00878701	1.02923	0.0415608	insig
MW0007593	C11H17NO3	Mescaline	Benzene and substituted derivatives	Benzene and substituted derivatives	MS2-Search-DB	0.7183	54-04-6	343775	334105	378418	244583	237970	430588	355425	273920	118058	283263	659130	284671	311789	251065	199878	345141	285809	250523	279217	269876	265527	293075	240268	251686	278440	0.0705161	0.954103	0.992431	-0.0109619	insig
MW0157470	C41H48N2O8	Thalicarpine	Alkaloids	Alkaloids	MS2-Insilico	0.7432	5373-42-2	2.80622e+06	2.57548e+06	2.36656e+06	3.03413e+06	3.08947e+06	3.07578e+06	1.93009e+06	2.76304e+06	2.91992e+06	1.68252e+06	2.81721e+06	2.80379e+06	3.10586e+06	3.42518e+06	3.01273e+06	2.73013e+06	2.22048e+06	3.62224e+06	3.01184e+06	2.87858e+06	3.30984e+06	3.28698e+06	3.071e+06	3.50097e+06	3.0103e+06	1.30134	0.0304074	1.16366	0.218666	insig
MEDN0057	C11H13NO4	N-Acetyl-L-Tyrosine	Amino acid and Its metabolites	Amino acid derivatives	MS2-Search-Local	0.7198	537-55-3	171895	72547.3	119852	53717.1	308602	198142	28799	377863	41267.6	396504	17853.9	116006	185880	552354	120840	10214.3	89924.3	287910	209428	341788	71939.6	100554	240456	787612	65428.5	0.104756	0.612063	1.20514	0.269204	insig
MW0007517	C29H33ClN2O2	Loperamide	Benzene and substituted derivatives	Benzene and substituted derivatives	MS2-Search-DB	0.9119	53179-11-6	1.4042e+06	1.21438e+06	1.20079e+06	1.61263e+06	1.75377e+06	1.5259e+06	764737	1.32685e+06	1.62774e+06	710787	1.29908e+06	1.27298e+06	1.2821e+06	1.72169e+06	1.61139e+06	1.24348e+06	1.34352e+06	1.86696e+06	1.40486e+06	1.30276e+06	1.59528e+06	1.61408e+06	1.32439e+06	1.85631e+06	1.39011e+06	0.888141	0.218734	1.12258	0.166816	insig
MW0003350	C9H13N	2-Phenylpropan-1-amine hydrochloride	Others	Others	MS2-Search-DB	0.7192	52991-03-4	382011	236240	202337	498249	461989	512865	473867	310973	548509	529441	1.59932e+06	468738	1.3826e+06	284909	534882	283249	917983	531528	544218	1.46411e+06	867129	376410	1.52892e+06	524092	306530	1.17507	0.0145988	1.86289	0.897544	insig
MW0012920	C21H45O6P	1-Octadecyl lysophosphatidic acid	GP	PA	MS2-Search-DB	0.7113	52977-29-4	17146.1	16093.5	5499.71	8114.96	6145.79	10889.6	13789.6	15126.1	16503.5	24704	14366.6	17392.8	7324.24	21880.3	19728.3	25347.9	14544.7	24161.8	15763.9	29943.8	17465.6	14608.6	20478.9	37086.7	18133.2	1.26992	0.0220441	1.48357	0.569078	insig
Lmhp001461	C11H20N2O3	L-Prolyl-L-Leucine	Amino acid and Its metabolites	Small Peptide	MS2-Search-DB	0.8511	52899-07-7	4.58154e+06	3.23769e+06	5.51205e+06	8.93207e+06	4.91351e+06	5.48294e+06	3.42173e+06	3.04068e+06	3.55582e+06	3.83446e+06	4.28076e+06	4.66477e+06	5.5087e+06	8.9417e+06	4.16803e+06	1.88895e+06	4.86839e+06	4.5266e+06	4.15201e+06	5.24945e+06	2.89894e+06	6.91466e+06	3.24009e+06	2.30302e+06	3.3066e+06	0.229149	0.794906	0.959064	-0.0603007	insig
MW0012825	C24H52NO6P	1-Hexadecyl-sn-glycero-3-phosphocholine	GP	PC	MS2-Search-Local	0.8863	52691-62-0	627970	625719	529729	426118	543384	726478	546345	432306	615011	652661	659262	881218	552782	706292	873781	759970	616856	784317	593191	780665	916770	519046	402656	370192	678430	0.777364	0.0687721	1.17545	0.23321	insig
MW0168747	C11H6O3	Angelicin	Heterocyclic compounds	Heterocyclic compounds	MS2-Search-Local	0.7655	523-50-2	527802	806034	771122	768484	482198	454756	461516	433981	414336	467729	448667	415465	452204	422113	389658	376802	387137	355499	407530	381173	412556	448428	400899	340586	356981	1.80686	0.0108311	0.715312	-0.483355	insig
MW0053623	C42H72O13	Ginsenoside Rg2	Steroids	Steroid	MS2-Search-DB	0.6897	52286-74-5	2.94439e+06	2.49774e+06	1.88313e+06	2.64698e+06	3.0317e+06	3.01156e+06	1.6479e+06	2.77056e+06	2.85473e+06	1.28508e+06	2.26057e+06	2.35342e+06	2.49368e+06	3.58803e+06	3.55822e+06	2.52997e+06	4.94795e+06	4.10756e+06	2.96962e+06	2.96869e+06	3.07256e+06	3.30687e+06	3.22822e+06	4.29237e+06	2.86329e+06	1.37757	0.0107138	1.31688	0.397123	insig
MW0107685	C3H7NO2S	L-Cysteine	Amino acid and Its metabolites	Amino acids	MS2-Search-DB	0.6736	52-90-4	418551	872583	300580	329215	322494	303961	325730	344429	333315	348044	345379	446361	352268	249561	325736	339970	318014	293323	291380	586132	289557	319330	440533	326089	299955	0.445091	0.492345	0.893173	-0.162988	insig
MW0110019	C4H8Cl3O4P	Trichlorfon	Others	Insecticide	MS2-Search-DB	0.6043	52-68-6	7310.45	4872.91	3220.92	11557.3	4485.01	6302.64	7368.13	6047.92	7402.84	10103.4	11865.5	22703.7	14956.3	15786.9	16728	15675.2	18178.6	19058.6	12703.1	8099.5	19455.2	13953.5	13126.4	13686.5	13172.9	2.20685	5.36328e-07	2.2246	1.15354	up
MW0110043	C9H15O6P	Tris(2-carboxyethyl)phosphine hydrochloride	Organic acid And Its derivatives	Organic acid And Its derivatives	MS2-Search-DB	0.7112	51805-45-9	316622	288014	260055	261291	287805	256479	296227	295728	255258	208904	238791	257855	233183	274962	224961	267641	230951	172518	145703	224627	228847	87442.3	229055	226790	102673	1.27809	0.00163813	0.769273	-0.378432	insig
MEDP2105	C16H34O9	3,6,9,12,15,18,21-Heptaoxatricosane-21,23-diol	Benzene and substituted derivatives	Benzene and substituted derivatives	MS2-Search-Local	0.8919	5117-19-1	3.03312e+06	2.82343e+06	3.24041e+06	3.65307e+06	3.35365e+06	2.94533e+06	1.93684e+06	2.78027e+06	3.94291e+06	2.05986e+06	2.6643e+06	2.75276e+06	2.78721e+06	3.41957e+06	3.67895e+06	2.74313e+06	7.39498e+06	3.89473e+06	3.01127e+06	3.06925e+06	3.25788e+06	3.37699e+06	3.93474e+06	3.52135e+06	3.25286e+06	0.844887	0.144479	1.18155	0.240675	insig
MW0006695	C9H13N	Dextroamphetamine	Benzene and substituted derivatives	Benzene and substituted derivatives	MS2-Search-DB	0.8276	51-64-9	316539	95452.7	66922.4	100759	232567	100045	121808	317542	150426	216158	489893	410156	354495	517697	546677	258065	318651	222075	409529	189550	203672	262886	414706	354355	275333	1.80992	0.00034018	2.02836	1.02031	up
MW0012806	C25H52NO7P	1-Heptadecanoyl-sn-glycero-3-phosphocholine	GP	PC	MS2-Search-DB	0.9246	50930-23-9	359873	338026	292978	270103	290990	325101	318351	366581	389860	375609	350163	367137	345745	371148	414816	404464	441165	412174	387421	394169	389153	350258	369578	443722	422464	1.75942	0.00140113	1.17478	0.232392	insig
MEDP0902	C12H24O3	12-Hydroxydodecanoic acid	Organic acid And Its derivatives	Organic acid And Its derivatives	MS2-Search-Local	0.6743	505-95-3	138250	147771	86333.9	130294	89808.7	176315	133556	225904	114765	159679	120988	122890	160166	144222	107625	104620	180981	125217	96819.7	130802	94719.1	73494.7	102878	59552.7	128614	0.830348	0.147665	0.833449	-0.262834	insig
MEDN0061	C10H11NO3	Phenaceturic acid	Amino acid and Its metabolites	Amino acid derivatives	MS2-Search-Local	0.7469	500-98-1	549767	570113	531178	538612	553965	579660	562248	576588	560571	1.28591e+06	558473	1.15618e+06	542370	521782	494545	513989	540411	488893	1.03936e+06	507655	498012	484231	516392	1.03727e+06	469905	0.181284	0.948487	0.990125	-0.0143177	insig
MEDTN02958	C3H7NO5S	L-Cysteic acid	Organic acid And Its derivatives	Organic acid And Its derivatives	MS2-Search-Local	0.5616	498-40-8	218739	245179	121899	141311	144959	158011	150818	170507	73782.4	117237	146074	149128	42257.3	86422.3	47104.1	30747.7	128483	161171	84768.5	97614.9	155629	141704	149714	62797.3	677671	0.816698	0.815074	0.93414	-0.0982896	insig
MW0168946	C5H6O4	Citraconic Acid	Organic acid And Its derivatives	Organic acid And Its derivatives	MS2-Search-DB	0.6468	498-23-7	467360	397706	280098	592567	351059	460537	672472	655241	720835	644210	691705	210727	570410	306403	457221	887440	571956	548105	1.04216e+06	333204	519902	832613	391491	614024	390745	0.123742	0.664251	1.06422	0.0897978	insig
MEDP0646	C8H8O	2,3-Dihydrobenzofuran	Benzene and substituted derivatives	Benzene and substituted derivatives	MS2-Search-Local	0.9273	496-16-2	1.66571e+06	1.95328e+06	1.76562e+06	2.01349e+06	1.90326e+06	2.1195e+06	1.75813e+06	1.85648e+06	1.92805e+06	1.80179e+06	1.758e+06	1.90022e+06	2.35433e+06	2.42043e+06	1.15713e+06	1.85126e+06	1.91645e+06	2.09992e+06	1.81565e+06	2.27325e+06	2.21237e+06	1.80062e+06	2.1755e+06	1.03547e+06	1.91207e+06	0.0591998	0.749923	1.019	0.0271483	insig
MW0169265	C9H9NO3	Hippuric Acid	Organic acid And Its derivatives	Organic acid And Its derivatives	MS2-MetDNA	0.9719	495-69-2	46639	62795.5	46399.8	65335.7	52545.6	49060.4	50558.9	45247.5	63302.9	35934.7	54831.9	49390.4	56867.2	63747.8	38981.5	57887.7	47549.7	42669.1	40587.9	58953.7	41014.2	48956.3	57617.5	30335.3	46972.3	0.358322	0.488835	0.948028	-0.0769978	insig
MW0063634	C29H46O4	Neotigogenin acetate	Others	Others	MS2-Search-DB	0.6705	4948-43-0	23279.9	82090.4	46522.1	62635.8	64978.2	38754.2	86508.7	50950.5	49423.4	78346.4	36195.3	28718.9	75508.1	74967.6	90176.3	37864	30689.9	28613.8	59469.1	33869.3	34849.2	66710	45144.3	22036.7	45680.5	0.67294	0.204839	0.811774	-0.300849	insig
FDATN00641	C10H6O4	Chromocarb	Organic acid And Its derivatives	Organic acid And Its derivatives	MS2-Search-DB	0.7157	4940-39-0	300616	313024	358124	354183	364360	335904	342813	349072	319364	421769	380537	303024	391218	355025	317375	309355	333614	288726	344653	373005	340303	337191	392403	311897	341396	0.136649	0.737617	0.986679	-0.0193479	insig
MW0000126	C10H14N2	Anabasine	Alkaloids	Alkaloids	MS2-Search-DB	0.7274	494-52-0	911203	305445	409249	301028	484563	413335	293561	553459	358105	744444	502076	326973	304686	466016	374611	540514	400364	286860	391912	350947	549769	371676	397506	371222	374498	0.566628	0.285875	0.839147	-0.253004	insig
MW0114665	C11H16O	Cis-Jasmone	Aldehyde,Ketones,Esters	Ketones	MS2-Search-Local	0.6337	488-10-8	1.60927e+07	2.29648e+07	1.76702e+07	1.86183e+07	1.62861e+07	1.65146e+07	1.66788e+07	2.6994e+07	2.54475e+07	2.17474e+07	2.51273e+07	1.87232e+07	1.92415e+07	1.57924e+07	1.66162e+07	1.58734e+07	2.17357e+07	1.84246e+07	1.26711e+07	1.36969e+07	1.57067e+07	1.63545e+07	1.5483e+07	1.186e+07	1.67622e+07	1.12893	0.0748	0.851091	-0.232615	insig
MEDN0621	C8H7NO4S	Indoxyl sulfate	Heterocyclic compounds	Indole and Its derivatives	MS2-MetDNA	0.8199	487-94-5	993950	384068	971471	997542	979949	1.05991e+06	946253	1.04694e+06	298266	1.05634e+06	1.07539e+06	901000	273019	933532	864695	939025	914513	921859	987295	987082	941871	1.01784e+06	380202	902772	222680	0.250442	0.632119	0.935945	-0.0955047	insig
MW0124414	C9H7NO	Indole-3-carboxaldehyde	Heterocyclic compounds	Indole and Its derivatives	MS2-Search-Local	0.7861	487-89-8	580679	416501	679166	122451	692651	703072	584540	732734	630694	156811	622355	914578	610738	273044	133221	156437	192453	478827	130997	155894	139647	232575	686880	628616	183708	0.950993	0.115179	0.696944	-0.520886	insig
MW0107415	C14H18N2O2	Hypaphorine	Organic acid And Its derivatives	Organic acid And Its derivatives	MS2-Search-Local	0.8708	487-58-1	833976	94157.8	716756	129198	1.36285e+06	702821	165708	165929	76914	122928	134725	86402.2	173119	659772	196595	76639.8	90657.4	35709.9	113942	30748.1	355267	134321	221477	69086.4	96463.4	1.08647	0.0892622	0.377456	-1.40562	insig
MW0126281	C31H32N6O2	Purmorphamine	Heterocyclic compounds	Heterocyclic compounds	MS2-Search-DB	0.8954	483367-10-8	2.41836e+06	2.06002e+06	1.929e+06	2.63441e+06	2.88496e+06	2.75248e+06	1.34372e+06	2.25608e+06	2.5377e+06	1.22831e+06	2.22283e+06	2.16246e+06	2.2079e+06	2.97682e+06	2.72472e+06	2.16204e+06	2.00754e+06	3.12048e+06	2.45005e+06	2.28488e+06	2.79781e+06	2.72422e+06	2.38601e+06	3.1433e+06	2.43829e+06	1.00159	0.141959	1.1434	0.193326	insig
MEDN0536	C18H22O5S	estrone 3-sulfate	Hormones and hormone related compounds	Hormones and hormone related compounds	MS2-Search-DB	0.7104	481-97-0	294117	294045	280926	284000	292858	282713	254854	259266	248930	273163	272375	227727	247913	233775	200888	196577	224282	175939	178375	197027	216540	184284	208199	169412	180062	2.1825	1.66504e-07	0.750697	-0.413697	insig
MW0016332	C28H48O	Campesterol	Hormones and hormone related compounds	Hormones and hormone related compounds	MS2-Search-DB	0.623	474-62-4	93228.8	95059.1	108468	58199.3	57123.7	125764	120221	76897.7	138358	68350.2	63128	79998.1	63261	129545	83505.6	75307.8	85664.6	137567	67581.6	68090.5	60280.8	57624.3	64917.1	109205	125151	0.496312	0.422	0.899697	-0.152489	insig
MW0111409	C3H6O4	D-Glyceric Acid	Organic acid And Its derivatives	Organic acid And Its derivatives	MS2-MetDNA	0.5343	473-81-4	696159	532895	731846	701896	714615	760002	607918	706350	367817	740685	734315	620632	419623	591503	649401	409692	366139	490553	384776	585668	376798	389633	268223	307014	358490	1.62028	0.0014811	0.706531	-0.501175	insig
MEDL01794	C30H48O3	Betulinic Acid	Terpenoids	Triterpene	MS2-Search-DB	0.6088	472-15-1	210298	192836	174732	204132	194335	215841	172554	192960	184029	192821	208265	194019	204939	219097	171434	197241	183169	197106	195349	176351	209577	198470	199914	165774	209704	0.166822	0.750835	1.00986	0.0141512	insig
MW0109767	C7H13NO2	Stachydrine	Amino acid and Its metabolites	Amino acid and Its metabolites	MS2-Search-Local	0.8894	471-87-4	1.01493e+06	147768	2.72215e+06	1.40625e+06	5.04788e+06	264998	2.54273e+06	87030.8	66616.7	154293	142435	2.98339e+06	4.59497e+06	2.72903e+06	107340	301180	337642	156738	521071	841441	96072.7	142589	2.36946e+06	213397	154957	0.167639	0.643673	0.777512	-0.363063	insig
MW0107601	C5H11NO2	Isovaline	Amino acid and Its metabolites	Amino acid derivatives	MS2-Search-DB	0.7035	465-58-7	5.04899e+06	6.27032e+06	1.15481e+07	5.80316e+06	4.53315e+06	5.67338e+06	5.86886e+06	5.48089e+06	4.75346e+06	6.50832e+06	5.51332e+06	5.49157e+06	4.34976e+06	5.78416e+06	4.78412e+06	1.10341e+07	4.93422e+06	2.08976e+06	4.88088e+06	5.24404e+06	7.12898e+06	5.26837e+06	7.53899e+06	4.46092e+06	5.09619e+06	0.463387	0.484424	0.906394	-0.14179	insig
MEDN0841	C4H8N2O3	3-Ureidopropionic Acid	Organic acid And Its derivatives	Organic acid And Its derivatives	MS2-Search-DB	0.6705	462-88-4	173524	259814	273588	203835	203808	201110	200153	198889	209833	239951	421073	301126	213084	112503	226135	186040	213205	227649	220955	189956	243943	306976	193439	207257	156011	0.0376966	0.591041	1.05316	0.0747238	insig
MW0151238	C3H4N2O2	Hydantoin	Heterocyclic compounds	Heterocyclic compounds	MS2-Insilico	0.6115	461-72-3	1.28116e+06	1.53918e+06	1.14407e+06	1.29535e+06	1.29582e+06	845151	1.16616e+06	2.02019e+06	1.26791e+06	1.39679e+06	1.7314e+06	1.10441e+06	1.66937e+06	1.24047e+06	1.13746e+06	1.58583e+06	1.41599e+06	861154	803136	1.24738e+06	1.02512e+06	1.5736e+06	512250	1.29752e+06	1.30549e+06	0.418322	0.492174	0.931224	-0.102799	insig
FDATN01445	C4H7NO2S	Timonacic	Others	FDA	MS2-Search-DB	0.7192	444-27-9	702663	575651	223364	349627	421301	528988	688427	458886	264140	390784	262986	345560	345033	547265	387050	322222	237497	506081	321585	273372	209787	466453	460588	245578	348405	0.995205	0.0843872	0.764503	-0.387407	insig
MW0120897	C5H6N2O3	5-Hydroxymethyluracil	Nucleotide And Its metabolites	Nucleotide and Its metabolites	MS2-MetDNA	0.8552	4433-40-3	235.698	562.871	251.037	915.78	1070.88	465.044	567.69	1073.95	505.741	703.169	716.781	785.899	164.966	1137.99	1018.71	697.75	987.483	287.733	758.787	716.636	128.781	819.735	939.832	716.613	668.818	0.0800976	0.58714	1.10692	0.146551	insig
MW0006211	C6H7NO2S	Benzenesulfonamide	Benzene and substituted derivatives	Benzene and substituted derivatives	MS2-Search-Local	0.5054	4388-24-3	1.31127e+06	1.29469e+06	1.16191e+06	1.36879e+06	1.27072e+06	1.41108e+06	1.24415e+06	1.15142e+06	1.58958e+06	1.11066e+06	1.50015e+06	1.16037e+06	1.01203e+06	1.08211e+06	1.07503e+06	1.00112e+06	1.04686e+06	1.01988e+06	1.9769e+06	1.39241e+06	2.52442e+06	2.94996e+06	2.53277e+06	2.49257e+06	2.17397e+06	0.742542	0.0644282	1.28749	0.364564	insig
MW0000119	C20H26N2O2	Ajmaline	Alkaloids	Alkaloids	MS2-Search-DB	0.6816	4360-12-7	2.97783e+06	2.73934e+06	3.31754e+06	3.59555e+06	3.08944e+06	2.76284e+06	2.0046e+06	2.59512e+06	3.91579e+06	2.19681e+06	2.61637e+06	2.53917e+06	2.72808e+06	3.11134e+06	3.18408e+06	2.65434e+06	5.59884e+06	3.7577e+06	2.83262e+06	2.95344e+06	3.21485e+06	3.30516e+06	3.50583e+06	3.0902e+06	3.078e+06	0.652231	0.287758	1.09997	0.137459	insig
MW0106353	C6H10N6O	Dacarbazine	Amino acid and Its metabolites	Small Peptide	MS2-Search-DB	0.7028	4342-03-4	398965	122865	388313	110154	788098	440823	102582	329891	264680	216213	284058	798223	180368	840867	397922	463255	441273	616654	334343	432869	411777	584115	150562	397113	481789	1.01692	0.111966	1.43663	0.522687	insig
MW0112276	C6H7NOS	2-Propionylthiazole	Heterocyclic compounds	Heterocyclic compounds	MS2-Search-DB	0.5107	43039-98-1	363999	436097	203220	360712	326695	1.1452e+06	1.13011e+06	213709	911845	238116	205148	1.65628e+06	858243	241461	1.09638e+06	333787	267037	984573	979290	137610	301944	997497	230001	220243	1.01347e+06	0.0894791	0.555205	1.19118	0.25239	insig
MW0011902	C44H84NO8P	1,2-dioleoyl-sn-glycero-3-phosphatidylcholine	GP	PC	MS2-Search-DB	0.9292	4235-95-4	6.40537e+06	6.46722e+06	5.38675e+06	4.15645e+06	2.89224e+06	741122	1.082e+06	9.41107e+06	2.45403e+06	9.8012e+06	6.65175e+06	5.05586e+06	3.59605e+06	1.46343e+06	445234	308921	240228	622477	444295	1.46275e+06	487234	587862	852845	892749	977805	1.65773	0.0119208	0.329109	-1.60336	down
MW0105431	C5H7ClN2O3	Acivicin	Others	Others	MS2-Search-DB	0.6506	42228-92-2	634098	637688	610491	642752	663284	675561	651952	635409	647749	645732	655557	638304	630970	654426	688766	670878	666461	639564	653495	627592	639152	634024	646814	640084	648691	0.330385	0.527918	1.007	0.0100693	insig
MW0110011	C6H6O6	trans-Aconitic acid	Organic acid And Its derivatives	Organic acid And Its derivatives	MS2-Search-DB	0.6062	4023-65-8	247823	174072	548504	176263	128824	104997	201311	159002	122444	466110	135645	374452	146663	474145	145467	222212	142265	140219	220505	274340	205163	76718.5	143201	219828	380654	0.0479604	0.821465	0.944892	-0.0817785	insig
MW0125834	C9H6N2O3	Nitroxoline	Heterocyclic compounds	Heterocyclic compounds	MS2-Search-Local	0.6844	4008-48-4	616734	536201	549450	555888	485734	528626	518127	504435	481822	530914	566234	500218	483202	472026	465777	494893	492390	437145	447391	413656	486607	453493	421680	379547	440251	1.7767	0.000660052	0.873474	-0.195164	insig
MEDP1102	C17H33NO4	Carnitine C10:0	FA	CAR	MS2-Search-Local	0.9295	3992-45-8	2.00159e+06	1.34028e+06	231942	1.7004e+06	938121	1.05176e+06	709527	801086	212401	538977	538407	170328	781615	608889	1.7169e+06	549179	118207	3.47613e+06	1.71694e+06	375954	691357	2.15358e+06	557298	237223	986395	0.216887	0.932269	1.02724	0.0387774	insig
MEDP1025	C14H20N2O3	Phe-Val	Amino acid and Its metabolites	Amino acid derivatives	MS2-Search-Local	0.5509	3918-92-1	116748	69.9084	94.546	111071	115846	119579	110034	112359	117456	111893	112911	113647	117244	2.89018e+06	107769	91.8156	115962	15455.9	109577	3.25588e+06	69.0507	111326	127.529	91.0098	4242.12	0.166462	0.197136	5.06625	2.34092	insig
MW0007640	C11H17NO3	Methoxamine	Benzene and substituted derivatives	Benzene and substituted derivatives	MS2-Search-DB	0.7204	390-28-3	521583	465982	512984	260686	484076	448217	458036	269796	385889	498940	433769	451108	443674	374111	416601	389263	368005	348003	334727	459978	463447	190567	345946	333848	336249	0.694572	0.165693	0.880794	-0.183124	insig
MW0016385	C15H24O2	Capsidiol	Alcohol and amines	Alcohols	MS2-Search-DB	0.7157	37208-05-2	2.36242e+06	1.41956e+06	405867	1.10544e+06	1.57071e+06	1.69271e+06	2.07632e+06	1.23767e+06	1.43089e+06	1.7789e+06	422351	387777	1.55541e+06	1.99322e+06	1.25498e+06	405006	2.00026e+06	1.66542e+06	397337	1.74633e+06	395694	1.66555e+06	1.79942e+06	1.32401e+06	1.95583e+06	0.563609	0.326005	0.838549	-0.254033	insig
MW0108594	C7H15N3O2	N5-(1-Iminoethyl)-L-ornithine	Amino acid and Its metabolites	Amino acid derivatives	MS2-Search-DB	0.7049	36889-13-1	103625	111576	131033	114215	131490	97892.2	145339	116987	107919	164388	137762	109416	124256	108499	118634	129916	104210	92091.4	108680	140300	102672	114233	126442	87409.5	115512	0.579412	0.323165	0.936483	-0.0946752	insig
MW0104959	C3H9NO3S	3-Amino-1-propanesulfonic acid	Organic acid And Its derivatives	Organic acid And Its derivatives	MS2-Search-DB	0.7172	3687-18-1	833939	271928	1.24916e+06	203379	1.21005e+06	840881	1.07153e+06	1.11886e+06	432918	172071	169400	1.25715e+06	244871	798635	1.23464e+06	319764	299992	1.06412e+06	1.14756e+06	1.21328e+06	1.22033e+06	267239	1.19606e+06	162216	1.16755e+06	0.0300662	0.813297	1.05904	0.0827557	insig
MEDP0034	C7H13N3O3	3-Methylhistidine	Amino acid and Its metabolites	Amino acid derivatives	MS2-Search-DB	0.7178	368-16-1	1.2477e+07	1.24777e+07	1.14937e+07	1.40372e+07	1.33136e+07	7.26149e+06	1.18262e+07	1.27195e+07	1.18879e+07	1.06033e+07	1.2762e+07	8.45385e+06	1.25611e+07	1.16516e+07	5.96358e+06	1.22844e+07	1.2705e+07	9.79296e+06	1.32248e+07	1.40208e+07	8.7541e+06	1.071e+07	7.92695e+06	4.40256e+06	5.98328e+06	0.831186	0.0905133	0.853514	-0.228513	insig
MW0103653	C8H12N4O5	Ribavirin	Nucleotide And Its metabolites	Nucleotide and Its metabolites	MS2-Search-DB	0.7149	36791-04-5	1.04331e+06	1.03481e+06	1.00902e+06	1.03487e+06	1.11346e+06	1.12777e+06	975827	1.1481e+06	995462	1.08664e+06	1.0785e+06	927796	1.0356e+06	1.04743e+06	932361	950363	1.00452e+06	1.05649e+06	1.04328e+06	972476	1.00386e+06	967992	1.131e+06	965960	972774	1.10788	0.0464842	0.951841	-0.0712072	insig
MW0112752	C9H12N2O	Kynuramine	Alcohol and amines	Amines	MS2-Search-DB	0.7057	363-36-0	116748	73117.3	50282.4	88858.2	56753	81417.3	92210	71090.2	59918.9	82553.4	38275.7	60460.7	69755.8	64999.4	91200.4	58054.2	33313.8	120361	91999.4	69951.7	79184.3	118514	68467.4	58556.1	100311	0.231714	0.79377	0.968934	-0.045529	insig
MW0106741	C9H17NO2	Gabapentin	Amino acid and Its metabolites	Amino acid derivatives	MS2-Search-DB	0.6093	360-70-3	420618	437341	426245	383774	327210	417716	439506	478525	430254	437251	383104	462552	319813	362686	439339	391238	446734	406012	399050	403614	306674	423173	370030	429265	428366	0.806254	0.217765	0.948233	-0.0766868	insig
MW0102866	C6H6O4	trans,trans-Muconic acid	FA	FFA	MS2-Search-DB	0.6603	3588-17-8	239086	129455	747888	411291	390014	169670	165388	240943	256713	336683	255707	167232	138234	1.22744e+06	199978	170144	252301	209117	203364	206752	199480	180933	196456	219371	244867	0.464169	0.68079	0.879214	-0.185713	insig
MW0108922	C7H11NO3	N-Tigloylglycine	Amino acid and Its metabolites	Amino acid derivatives	MS2-Search-DB	0.7071	35842-45-6	207417	608412	206626	25347.7	70012.2	310085	640878	470151	605555	660118	625927	244885	531287	252600	303794	663452	194487	228430	644068	567979	621429	199839	384615	341295	378247	0.651668	0.730476	1.08331	0.115444	insig
MW0054114	C5H12O7P2	Isopentenyl pyrophosphate	Organic acid And Its derivatives	Phosphoric acids	MS2-Search-DB	0.7049	358-71-4	105843	90934.8	70450.8	63159.4	77852.8	73840.2	72045.3	87585.5	90549.3	95730.1	70177.4	89889.5	99014.8	97723.7	90904.4	81311	108462	94942.2	87566.1	106210	95535.6	86805	83555.4	78806.3	82093.8	0.955087	0.158603	1.08938	0.123508	insig
MEDP1339	C26H53NO7P	LPC(18:1/0:0)	GP	LPC	MS2-Search-Local	0.9212	3542-29-8	1.12474e+07	1.04895e+07	1.00802e+07	1.06111e+07	9.50682e+06	1.38091e+07	1.24947e+07	8.73606e+06	1.26709e+07	8.76674e+06	1.19565e+07	1.14857e+07	1.07591e+07	1.01944e+07	1.43867e+07	1.83628e+07	1.35245e+07	1.56676e+07	1.30416e+07	1.09455e+07	1.15913e+07	1.38928e+07	1.01608e+07	1.08474e+07	1.02276e+07	1.01497	0.0573614	1.1502	0.201883	insig
MW0056964	C46H84NO8P	PC(18:0/20:4(5Z,8Z,11Z,14Z))	GP	PC	MS2-Search-DB	0.8209	35418-59-8	181427	325995	278939	220953	224378	111626	215107	271155	382157	220559	202772	224772	145001	154138	123709	29345	28547.6	28069.8	84684.5	50546.4	139072	48482.1	63418.3	35816.4	42637.8	1.89214	8.13378e-05	0.384002	-1.38081	down
MW0110797	C4H9N3O2	3-Guanidinopropionic acid	Organic acid And Its derivatives	Organic acid And Its derivatives	MS2-Search-DB	0.5767	353-09-3	212000	206639	169115	236233	256589	191437	186491	454868	176056	213932	502762	247092	186874	378395	253855	183545	249554	171608	227017	221312	191698	390427	224408	129004	248498	0.265736	0.52853	1.10159	0.139589	insig
MW0003668	C17H18N2S2	Dibenzthion	Benzene and substituted derivatives	Benzene and substituted derivatives	MS2-Search-DB	0.6464	350-12-9	1.08013e+06	1.4972e+06	505507	1.08888e+06	1.12869e+06	1.29885e+06	718878	941008	1.15181e+06	1019.29	1.06864e+06	1.06068e+06	1.16489e+06	1.8116e+06	1.34522e+06	936646	1.22658e+06	1.46351e+06	1.2293e+06	1.27247e+06	1.32924e+06	1.24841e+06	2.03363e+06	1.48665e+06	1.65754e+06	0.924767	0.0185918	1.44036	0.526434	insig
MEDP0364	C10H12N2O2	Trans-3-Hydroxycotinine	Heterocyclic compounds	Heterocyclic compounds	MS2-Search-Local	0.6182	34834-67-8	1.38487e+06	1.39418e+06	1.27886e+06	1.33474e+06	1.32759e+06	1.35691e+06	1.22955e+06	1.3098e+06	1.14488e+06	1.15697e+06	1.20609e+06	1.20748e+06	1.48253e+06	1.34947e+06	1.20702e+06	1.14961e+06	1.33927e+06	1.22443e+06	1.21777e+06	1.19372e+06	1.44379e+06	1.34434e+06	1.31112e+06	1.24249e+06	1.23224e+06	0.128851	0.692641	0.988329	-0.016937	insig
MW0006932	C5H12N2O2	D-Ornithine	Amino acid and Its metabolites	Amino acids	MS2-Search-Local	0.7442	348-66-3	72710.5	67086.5	63456.4	69044.5	69572	72023.4	151835	76217.6	75961.8	157200	135798	85032.8	145624	90734.3	87941	134598	88356	83318.5	130556	78655.6	79113.8	143395	144949	81324.6	128505	1.06715	0.124332	1.24777	0.319352	insig
MEDP1098	C11H11NO3	5-Methoxyindole-3-acetic acid	Heterocyclic compounds	Indole and Its derivatives	MS2-Search-Local	0.5462	3471-31-6	3.14085e+07	4.57634e+07	3.00119e+07	4.13043e+07	3.87422e+07	3.42564e+07	3.22862e+07	3.24268e+07	4.34333e+07	2.1693e+07	3.24375e+07	3.61304e+07	5.76125e+07	5.49483e+07	3.16457e+07	4.45012e+07	3.59501e+07	3.65704e+07	3.35781e+07	4.54617e+07	3.64363e+07	3.82251e+07	4.65329e+07	2.4704e+07	3.41151e+07	0.779648	0.216967	1.11738	0.160126	insig
MW0112918	C3H7O7P	3-Phosphoglyceric acid	Organic acid And Its derivatives	Organic acid And Its derivatives	MS2-Search-DB	0.6443	3443-58-1	42975.6	41629.4	40290.7	42838.8	44047.4	45921.6	42852.9	41557.6	45370.7	42567.3	42974.8	42612.4	41005.5	40538.4	39755.3	43818.2	39226.3	42435	40377	39551.6	40634.6	43362.8	41838.5	43580.9	41294.5	1.19777	0.0425805	0.965783	-0.0502285	insig
MEDTN03140	C3H7O7P	2-Phospho-D-Glyceric Acid	Organic acid And Its derivatives	Phosphoric acids	MS2-Search-DB	0.5229	3443-57-0	7.67159e+07	7.57043e+07	8.03539e+07	8.0201e+07	8.01062e+07	7.75662e+07	8.00042e+07	8.05006e+07	8.08755e+07	7.82308e+07	8.14832e+07	7.88151e+07	7.86635e+07	7.84646e+07	7.8276e+07	7.07606e+07	7.38764e+07	7.72282e+07	8.0359e+07	7.51999e+07	7.80401e+07	7.83294e+07	7.38626e+07	7.96379e+07	7.5954e+07	0.957023	0.0716279	0.977697	-0.0325401	insig
MW0138019	C5H9NO2	D-Proline	Organic acid And Its derivatives	Sulfonic acids	MS2-MetDNA	0.6686	344-25-2	757.56	550.827	499.45	977.067	1557.87	144.345	196.448	714.612	1865.32	1387.02	615.709	246.703	969.88	2460.56	807.349	185.448	2916.9	157.878	1037.19	2250.28	204.894	472.221	1036.69	9748.47	351.254	0.255795	0.300112	1.80809	0.854469	insig
MW0122960	C3H4ClN5	6-Chloro-1,3,5-triazine-2,4-diamine	Heterocyclic compounds	Heterocyclic compounds	MS2-Search-DB	0.65	3397-62-4	741115	886071	2.19972e+06	825030	968411	829720	889360	795516	876118	1.70299e+06	1.2009e+06	962187	962542	882495	1.58688e+06	1.08522e+06	2.14119e+06	698295	981397	628513	1.21591e+06	1.6181e+06	850584	1.0359e+06	1.54833e+06	0.318311	0.638596	1.0826	0.114494	insig
MW0104793	C2H6O3S2	2-Mercaptoethanesulfonic acid	Organic acid And Its derivatives	Organic acid And Its derivatives	MS2-Search-DB	0.609	3375-50-6	2.07477e+06	2.55637e+06	2.02393e+06	2.10792e+06	2.047e+06	2.06676e+06	2.14935e+06	2.06709e+06	2.11768e+06	2.15123e+06	2.09822e+06	2.17312e+06	2.08678e+06	2.1728e+06	2.15754e+06	2.16287e+06	2.22816e+06	2.07302e+06	2.18837e+06	2.03339e+06	2.09146e+06	2.02157e+06	2.06441e+06	2.08913e+06	2.18885e+06	0.183102	0.786193	0.993339	-0.0096422	insig
MW0126652	C10H19N5O	Terbumeton	Heterocyclic compounds	Heterocyclic compounds	MS2-Search-DB	0.7183	33693-04-8	840823	698981	824500	724238	850862	798919	714193	827342	645698	923788	897471	756882	856031	861350	668746	753312	791177	738235	745337	746660	793338	770118	881844	662676	734637	0.126898	0.815289	0.99013	-0.0143095	insig
MW0052941	C42H58O6	Fucoxanthin	Aldehyde,Ketones,Esters	Esters	MS2-Search-DB	0.6929	3351-86-8	15655.9	11931.4	22554.7	26380.4	11369.8	5968.68	5075.19	15642.8	44314.3	8943.62	15260.1	12997.5	15630.9	27341.5	22545.3	16671	16388.2	31394.7	24014	17733.2	10054	26240.3	31351.8	20310.7	27805.2	0.980152	0.319425	1.25415	0.326708	insig
MADN0614	C6H8N2O2S	2-Aminobenzenesulfonamide	Benzene and substituted derivatives	Benzene and substituted derivatives	MS2-Search-Local	0.636	3306-62-5	8.20152e+06	8.07706e+06	8.20233e+06	8.28719e+06	8.26204e+06	8.54578e+06	7.89933e+06	8.30529e+06	8.18946e+06	8.57868e+06	8.743e+06	7.68e+06	8.25091e+06	8.16394e+06	7.99915e+06	7.56718e+06	8.36568e+06	7.71768e+06	8.0815e+06	8.14959e+06	8.24377e+06	8.11287e+06	8.43253e+06	7.83134e+06	7.81448e+06	0.849844	0.0990062	0.978442	-0.0314418	insig
MEDP1780	C15H22N2O3	Leu-Phe	Amino acid and Its metabolites	Small Peptide	MS2-Search-Local	0.912	3303-55-7	352826	168913	51717.9	126837	475408	1.12049e+06	160764	226378	170208	226096	257379	537670	1.89375e+06	690510	835489	1.16335e+06	774279	436879	349232	430020	2.16034e+06	326435	122576	101348	205906	1.21339	0.0562708	2.22649	1.15477	insig
MW0001097	C9H10Cl2N2O	Diuron	Benzene and substituted derivatives	Benzene and substituted derivatives	MS2-Search-DB	0.5053	330-54-1	106434	84289.5	247352	113516	78188.7	125811	114540	164582	100756	128881	103157	69794.8	97958	122352	210189	141986	126344	116251	125187	78900.8	129519	98880.5	226377	428020	155921	0.378711	0.427343	1.17628	0.234228	insig
MW0009972	C10H12Cl3O2PS	Trichloronat	Benzene and substituted derivatives	Benzene and substituted derivatives	MS2-Search-DB	0.6793	327-98-0	367466	355007	146951	379298	374769	233958	356165	363968	447047	394570	338903	379477	367580	350503	354352	349214	305847	352250	272152	362074	338900	305787	358011	308388	294163	0.153693	0.835301	0.982218	-0.0258842	insig
MEDP1093	C5H4N4O	Allopurinol	Nucleotide And Its metabolites	Nucleotide and Its metabolites	MS2-Search-Local	0.826	315-30-0	189250	121374	15616.5	19319.1	14247.3	198595	11308.6	35927.7	28456	134046	76264.7	82370.7	207126	177781	64216.7	310007	316346	37574.3	180693	110848	296781	100184	43500.2	72980.9	52974.9	1.31794	0.0776773	1.84832	0.886213	insig
MW0062192	C10H20NO4PS	Propetamphos	Others	Others	MS2-Search-DB	0.6836	31218-83-4	349629	364293	382321	381059	365126	324869	331557	346799	409095	373084	413503	344076	218517	267945	299502	255477	228369	198111	143236	313541	189111	190529	207493	173713	166800	1.95735	1.45268e-05	0.663376	-0.592102	insig
MW0107942	C6H11NO2	L-Pipecolic acid	Organic acid And Its derivatives	Organic acid And Its derivatives	MS2-MetDNA	0.8648	3105-95-1	6850.01	3005.47	2654.61	3572.04	287.619	2634.24	2950.69	186.198	1176.7	8498.88	4156.32	12966.6	825.353	2350.87	1922.33	3614.47	185.261	940.253	1244.24	544.99	2382.05	771.589	551.122	634.836	1072.63	0.55853	0.450438	0.715833	-0.482305	insig
MW0007515	C11H12Cl2N2O	Lofexidine	Benzene and substituted derivatives	Benzene and substituted derivatives	MS2-Search-DB	0.6961	31036-80-3	150638	149181	140746	143711	144861	124271	62143.4	59333.2	148542	141687	126403	125569	134526	139653	118818	123967	139349	138148	149277	113691	154500	154999	147018	131373	152848	0.674409	0.404874	1.08035	0.111495	insig
MEDP0618	C12H23NO4	Carnitine 2-methyl-C4	FA	CAR	MS2-Search-Local	0.9267	31023-25-3	828958	1.284e+06	937820	847151	1.15823e+06	843274	830115	740193	736945	827105	451763	1.07849e+06	576000	1.13877e+06	1.32742e+06	973920	797096	767424	932089	1.7219e+06	1.3622e+06	812407	886004	746205	785847	0.19375	0.601969	1.05954	0.083442	insig
MW0010030	C12H17NO3	Vanillic acid diethylamide	Benzene and substituted derivatives	Phenolics	MS2-Search-DB	0.7132	304-84-7	138313	204523	90678.3	107506	152646	112590	143373	127987	139953	106248	110519	137557	198723	141613	194984	89524.8	203892	130473	99219.5	139133	314343	138039	151633	138454	97595.1	0.621325	0.276147	1.15107	0.20297	insig
MW0105179	C6H11NO3	4-Acetamidobutyric acid	Organic acid And Its derivatives	Organic acid And Its derivatives	MS2-Search-Local	0.6841	3025-96-5	142871	111131	116602	131668	189284	174703	161712	111528	80431.5	154302	152261	86458.6	62717	151458	80875.6	106253	34219.9	53620	88505.5	64904	37049.9	50794.9	101879	50503.9	44409.5	1.7788	0.000440764	0.565605	-0.822132	insig
MEDP0574	C18H35NO	Oleamide	Alcohol and amines	Amines	MS2-Search-Local	0.8408	301-02-0	736921	2.79202e+06	257705	375984	1.13492e+06	1.21134e+06	256343	598234	4.30306e+06	653340	584160	2.51586e+06	1.53513e+06	1.12474e+06	2.39398e+06	3.45288e+06	1.17345e+06	1.11954e+06	4.44665e+06	1.44687e+06	2.1495e+06	694956	1.8849e+06	8.47335e+06	712892	1.19428	0.142357	1.82409	0.867178	insig
MW0006037	C9H13N	Amphetamine	Benzene and substituted derivatives	Benzene and substituted derivatives	MS2-Search-DB	0.7209	300-62-9	358187	366385	358974	355425	357483	365613	349392	344819	338268	364650	365491	338979	357399	344987	322217	323930	339163	297905	301621	333056	371455	310620	357170	307635	301729	1.39454	0.00242085	0.931551	-0.102294	insig
MW0122647	C11H9NO4	Xanthurenic acid 8-methyl ether	Organic acid And Its derivatives	Organic acid And Its derivatives	MS2-Search-DB	0.7662	2929-14-8	399746	488887	397585	468423	445829	419500	424756	415573	570656	355793	498468	479587	475865	508430	430630	528348	429270	415840	421644	540693	384493	437552	504505	341784	434076	0.424966	0.489231	1.03815	0.0540216	insig
MW0103595	C10H12N4O5	Inosine	Nucleotide And Its metabolites	Nucleotide and Its metabolites	MS2-Search-DB	0.905	292853-81-7	1.36414e+06	259733	1.04081e+06	82231	94487.6	98378.4	84815	351591	325834	951621	118276	75510.5	1.59628e+06	1.93401e+06	1.17529e+06	1.04215e+06	700784	476249	673870	1.06079e+06	207329	494257	977606	1.79314e+06	115201	0.980367	0.107982	1.78222	0.833678	insig
MW0107649	C4H9NO3	L-Allothreonine	Amino acid and Its metabolites	Amino acids	MS2-Search-Local	0.6272	28954-12-3	529332	511574	255760	465627	102786	236057	127644	220197	125953	244379	254003	451442	92645	219227	203958	160955	165891	155159	66507.6	109105	139759	468251	208192	146011	422370	0.724326	0.307097	0.771696	-0.373895	insig
MW0150782	C16H35NO2	Hexadecasphinganine	SL	SPH	MS2-Insilico	0.5665	28457-97-8	441470	446602	303238	285496	438418	497940	497440	500299	449874	480614	323567	314952	547218	539486	476209	421266	530050	471743	291117	488608	421561	389541	413811	371508	390327	0.00537839	0.805715	0.9814	-0.0270862	insig
MEDP0442	C8H20NO6P	Choline Alfoscerate	GP	PC	MS2-Search-Local	0.8085	28319-77-9	284540	256784	246911	309930	224666	344435	274462	244716	246770	177002	385245	273832	293633	304309	272416	424882	245342	365156	245840	203035	222865	315416	241911	216851	235613	0.426387	0.333901	1.08454	0.117089	insig
MW0106686	C2H8O7P2	Etidronic acid	Organic acid And Its derivatives	Organic acid And Its derivatives	MS2-Search-DB	0.5347	2809-21-4	492411	252032	288742	262302	438979	241078	257410	225178	346609	505782	308636	544968	292892	531324	538295	411632	422807	436444	389713	778884	626594	617030	571493	542312	335352	1.60305	0.00365315	1.4798	0.565404	insig
MW0001335	C19H20N6O	Imidocarb	Benzene and substituted derivatives	Benzene and substituted derivatives	MS2-Search-DB	0.9116	27885-92-3	5.20691e+06	4.76652e+06	6.20915e+06	7.07482e+06	5.44794e+06	4.97219e+06	3.4655e+06	4.74479e+06	6.5772e+06	3.83654e+06	5.05333e+06	4.45253e+06	4.79199e+06	5.55172e+06	5.81556e+06	4.54028e+06	1.02466e+07	6.50043e+06	4.7104e+06	4.60151e+06	5.25345e+06	5.77081e+06	5.72184e+06	4.85293e+06	4.94541e+06	0.324609	0.580206	1.05553	0.0779677	insig
MW0013002	C44H84NO8P	1-Stearoyl-2-linoleoyl-sn-glycero-3-phosphocholine	GP	PC	MS2-Search-DB	0.9144	27098-24-4	104695	276304	133044	103277	4560.68	35768.5	95189	356592	240672	626720	176912	779354	293384	52986	28797.7	16810.8	8961.76	8948.71	11331.7	9812.67	2306.13	1421.33	147256	6199.22	4814.76	1.27404	0.247498	0.522487	-0.936533	insig
MW0013613	C42H82NO8P	2-Oleoyl-1-palmitoyl-sn-glycero-3-phosphocholine	GP	PC	MS2-Search-DB	0.9175	26853-31-6	131302	255867	361057	175275	270002	136247	127672	167357	104822	151087	160480	98251.6	164113	84611.8	66966.9	53259.1	53953.3	55635.8	118686	128560	127309	172420	75326	102774	331405	1.3424	0.04444	0.635849	-0.653244	insig
MW0002124	C11H15NO2	2,3,5-Trimethacarb	Benzene and substituted derivatives	Benzene and substituted derivatives	MS2-Search-DB	0.6149	2655-15-4	567967	961518	512790	337539	614582	672105	574099	507624	587402	584131	950902	444337	978358	625549	958556	636882	760141	281324	327688	649738	543092	485441	955545	523403	599902	0.250949	0.476082	1.09474	0.130583	insig
MW0009530	C12H17NO2	Promecarb	Benzene and substituted derivatives	Benzene and substituted derivatives	MS2-Search-DB	0.6605	2631-37-0	539918	482803	495999	600030	630929	544255	329872	501173	662556	337122	471956	505814	515527	658853	726418	496329	1.62712e+06	775658	542638	554691	591135	611590	692379	677565	575234	1.08754	0.0674007	1.30388	0.382811	insig
MW0114590	C12H26O7	Hexaethylene glycol	Alcohol and amines	Alcohols	MS2-Search-Local	0.8812	2615-15-8	1.41288e+06	1.34313e+06	1.70104e+06	1.73463e+06	1.46156e+06	1.2961e+06	1.02932e+06	1.23073e+06	1.92542e+06	1.10858e+06	1.32541e+06	1.15425e+06	1.35897e+06	1.38601e+06	1.44167e+06	1.24578e+06	2.06433e+06	1.77162e+06	1.39689e+06	1.38976e+06	1.60962e+06	1.63306e+06	1.54094e+06	1.34746e+06	1.41109e+06	0.358513	0.66606	1.03331	0.0472797	insig
MW0109598	C4H9NO2Se	Se-methylselenocysteine	Amino acid and Its metabolites	Amino acid derivatives	MS2-MetDNA	0.8927	26046-90-2	40050.8	39493.9	32094.6	39491.2	40298.4	43022.8	31775.6	68763.7	46360.4	35039.4	83885.7	70368.1	60327.9	33317.4	64470.6	32962	46609.5	26663.7	47747.5	39776.3	60729.8	40109.4	35401.8	34422.7	34056.4	0.403054	0.303917	1.13811	0.186642	insig
MW0111035	C8H17N3	Ethyldimethylaminopropyl Carbodiimide	Alcohol and amines	Amines	MS2-Search-DB	0.6081	25952-53-8	562851	508377	530041	581900	152749	533716	551088	554015	518632	571579	520988	502210	162140	162462	503654	551543	570860	503836	511728	681365	456955	567240	133036	495879	554355	0.492778	0.422538	0.90534	-0.143468	insig
MW0106705	C11H8N2O3S2	D-Luciferin	Heterocyclic compounds	Heterocyclic compounds	MS2-Search-DB	0.9211	2591-17-5	5.99539e+06	6.53988e+06	7.41711e+06	7.62439e+06	7.98347e+06	7.27813e+06	7.29336e+06	7.63987e+06	6.71287e+06	9.12067e+06	8.10852e+06	6.19489e+06	8.50131e+06	7.72061e+06	6.58309e+06	6.54583e+06	7.1134e+06	6.53642e+06	8.6212e+06	8.07045e+06	7.13032e+06	7.01158e+06	8.77911e+06	6.69551e+06	7.36283e+06	0.11979	0.914633	1.00514	0.00739488	insig
MEDP2121	C15H33N	Pentadecylamine	Alcohol and amines	Amines	MS2-Search-Local	0.6554	2570-26-5	1.00697e+07	1.06086e+07	1.0188e+07	9.97283e+06	1.00715e+07	1.14889e+07	1.16994e+07	1.12427e+07	1.05148e+07	1.13546e+07	1.17075e+07	1.0957e+07	1.26404e+07	1.25552e+07	1.16759e+07	1.00328e+07	1.24689e+07	1.14514e+07	1.00885e+07	1.13228e+07	9.99079e+06	9.21832e+06	9.55856e+06	9.24187e+06	9.45555e+06	0.0946295	0.790043	1.00963	0.0138299	insig
MEDP1177	C5H11NO2	N-Methyl-alpha-aminoisobutyric acid	Amino acid and Its metabolites	Amino acid derivatives	MS2-Search-DB	0.6964	2566-34-9	2.22733e+06	3.87075e+06	1.87908e+06	1.78763e+06	2.04963e+06	2.00189e+06	1.97711e+06	1.78522e+06	1.54044e+06	2.12984e+06	1.99194e+06	2.18286e+06	3.6721e+06	1.04063e+06	1.92822e+06	2.90194e+06	1.96526e+06	1.05889e+06	1.81467e+06	1.95794e+06	1.57083e+06	1.15359e+06	1.29115e+06	1.13196e+06	1.92247e+06	0.74648	0.311698	0.865438	-0.208497	insig
MW0063665	C25H49NO4	Stearoyl-L-carnitine	FA	CAR	MS2-MetDNA	0.8013	25597-09-5	82657.6	80358.3	47975.4	51218.5	48225.3	72682.5	93452.2	64307	45991.1	88903.4	60515	114840	58596.7	47757.1	107527	186634	63925.7	89494.1	72337.6	37191.2	101930	88387.3	47270	37786.3	60597	0.249402	0.365187	1.15896	0.212832	insig
MEDP1084	C19H37NO4	Carnitine C12:0	FA	CAR	MS2-Search-Local	0.8953	25518-54-1	540946	389474	59718.9	401811	273304	419292	239027	216467	62784.1	174758	103700	82352.1	431399	183456	766929	157369	65314.3	826920	765042	110229	240341	550952	185221	80399.4	280448	0.0271476	0.616057	1.1593	0.213253	insig
MEDP0577	C11H21NO4	Carnitine isoC4:0	FA	CAR	MS2-Search-Local	0.9142	25518-49-4	1.89002e+06	1.37574e+06	1.55735e+06	1.35494e+06	1.81692e+06	1.08815e+06	1.71366e+06	1.53943e+06	1.41609e+06	2.13663e+06	765075	1.68749e+06	789522	2.41061e+06	3.8397e+06	1.62192e+06	960914	2.30017e+06	1.30994e+06	2.93931e+06	2.58448e+06	1.12371e+06	1.83137e+06	1.87806e+06	1.26554e+06	0.24795	0.35428	1.14578	0.196331	insig
MW0127080	CH5AsO2	Methylarsonous acid	Organic acid And Its derivatives	Organic acid And Its derivatives	MS2-Insilico	0.6745	25400-23-1	6.22637e+06	6.4149e+06	6.19118e+06	6.21656e+06	6.23743e+06	6.30198e+06	6.46096e+06	6.24456e+06	6.41734e+06	6.52461e+06	6.54316e+06	6.56098e+06	6.56262e+06	6.28527e+06	5.97794e+06	6.55056e+06	6.49582e+06	6.52098e+06	6.32671e+06	6.36601e+06	6.0469e+06	2.84666e+06	6.16819e+06	6.20534e+06	5.86128e+06	0.461873	0.345676	0.962728	-0.0548004	insig
MEDP1310	C11H12N2O3	4-hydroxy-L-tryptophan	Amino acid and Its metabolites	Amino acid derivatives	MS2-Search-Local	0.9237	25242-90-4	1.59098e+06	1.92778e+06	1.57557e+06	1.83401e+06	1.72392e+06	1.61023e+06	1.60465e+06	1.58286e+06	2.23519e+06	1.42547e+06	1.94271e+06	1.85772e+06	1.81079e+06	1.99674e+06	1.68109e+06	2.0735e+06	1.66637e+06	1.58298e+06	1.58298e+06	2.12604e+06	1.41796e+06	1.61046e+06	1.9361e+06	1.31446e+06	1.64036e+06	0.223558	0.694255	1.02238	0.0319247	insig
MW0104828	C6H10O3	2-Oxohexanoic acid	Organic acid And Its derivatives	Organic acid And Its derivatives	MS2-MetDNA	0.7125	2492-75-3	61790.7	74730.4	68831.3	72971.3	71166.2	33272	60444.2	68310.1	67036.8	64855.9	71379.5	67604.3	40962.2	65030.5	60126.7	71597.3	59346.5	46405.6	70728.1	77268.5	52057.7	63209.9	66621.2	50967.1	50179.4	0.368562	0.468202	0.946504	-0.0793188	insig
MEDN0659	H4O7P2	Pyrophosphate	Organic acid And Its derivatives	Phosphoric acids	MS2-Search-DB	0.5945	2466-09-3	138365	114579	120827	103278	144920	138471	117932	102604	141021	119935	158619	128851	92615.9	85831.4	134808	70312.4	33176.5	67377.1	28958.9	98261.2	50906.2	101996	45335	46276.9	80029.6	1.56485	0.00103138	0.656695	-0.606705	insig
MW0108964	C4H11O3PS	O,O-Diethyl thiophosphate	Aldehyde,Ketones,Esters	Esters	MS2-Search-DB	0.8974	2465-65-8	1.21156e+06	4.20517e+06	1.14767e+06	1.19364e+06	1.16009e+06	1.18245e+06	1.17622e+06	1.12454e+06	1.32126e+06	4.32712e+06	1.17396e+06	1.21476e+06	947473	986483	1.10549e+06	1.2162e+06	1.20279e+06	1.06754e+06	3.80089e+06	1.11995e+06	834332	1.06921e+06	1.05274e+06	1.08555e+06	2.13141e+06	0.746413	0.317493	0.739025	-0.436304	insig
MW0126012	C5H4N4O2	Oxypurinol	Heterocyclic compounds	Heterocyclic compounds	MS2-Search-Local	0.717	2465-59-0	3.4004e+06	2.01401e+06	3.6842e+06	3.40443e+06	2.0925e+06	4.01402e+06	3.70236e+06	3.46999e+06	3.46764e+06	4.56412e+06	4.37512e+06	3.16778e+06	2.80379e+06	2.82775e+06	2.00768e+06	2.41153e+06	2.0809e+06	2.23335e+06	1.74124e+06	1.72163e+06	1.32699e+06	2.58587e+06	1.46919e+06	1.71914e+06	1.65599e+06	1.65302	0.00267698	0.672863	-0.571615	insig
MW0006427	C12H17NO3	Bufexamac	Benzene and substituted derivatives	Benzene and substituted derivatives	MS2-Search-DB	0.6587	2438-72-4	127666	236212	133151	227892	74462.7	184302	90264.1	165898	145558	99575.9	173929	153586	88452.3	152047	162966	133456	157164	160445	227980	160742	90470.5	60303.3	120840	238629	118391	0.0699557	0.931438	0.987398	-0.0182957	insig
MW0007400	C11H16NO4PS	Isocarbophos	Benzene and substituted derivatives	Benzene and substituted derivatives	MS2-Search-DB	0.5581	24353-61-5	17392.1	23335.6	15372.2	17188.9	15269.4	14413	8399.83	17184	20066.2	13808.1	12178.1	18686.2	11202.6	22071.4	18336	19174.5	20743	20674.1	15305	30187.7	19570.3	21381	20067.6	11510.9	19904.2	0.73187	0.171971	1.15329	0.205759	insig
MW0053496	C20H34O	Geranylgeraniol	Alcohol and amines	Alcohols	MS2-Search-DB	0.6034	24034-73-9	695599	356713	326701	289353	317124	424381	432762	443358	385306	424313	467120	399037	862959	713845	482011	345595	503650	385667	332339	389083	331348	270568	263041	262342	277704	0.00720158	0.868969	1.02326	0.0331712	insig
MW0009532	C12H11Cl2NO	Propyzamide	Benzene and substituted derivatives	Benzene and substituted derivatives	MS2-Search-DB	0.6976	23950-58-5	643466	637864	626525	638325	625365	664450	601711	603952	607323	645895	649388	564613	629910	589210	543242	544928	573464	517812	517532	548600	572938	530844	549074	490319	523571	1.96445	9.93713e-06	0.883835	-0.178151	insig
MW0109330	C20H30N6O4	Pro-Phe-Arg	Amino acid and Its metabolites	Small Peptide	MS2-Search-DB	0.5459	23846-09-5	4.18391e+06	4.80842e+06	6.18509e+06	5.81877e+06	5.96394e+06	6.41939e+06	5.80859e+06	4.32825e+06	5.25269e+06	5.70373e+06	5.98472e+06	6.06433e+06	5.57798e+06	4.52773e+06	4.74442e+06	4.2967e+06	4.72462e+06	4.45866e+06	4.50581e+06	5.3463e+06	6.06672e+06	5.67614e+06	5.62259e+06	4.73079e+06	4.41365e+06	0.611416	0.282415	0.939199	-0.0904971	insig
MW0117021	C8H7NO	4-Hydroxyindole	Heterocyclic compounds	Indole and Its derivatives	MS2-Search-DB	0.7206	2380-94-1	443743	413690	398229	418801	426896	415011	381561	374515	363311	437400	409726	350417	392366	400264	347455	340504	379931	318278	341477	352930	377164	353845	367054	329989	328194	1.79232	0.000349228	0.882132	-0.180933	insig
MEDL02503	C23H45NO4	Carnitine C16:0	Alkaloids	Alkaloids	MS2-Search-Local	0.8852	2364-67-2	531007	614525	305459	526872	526735	674070	694023	495824	234867	927978	315319	388647	1.32307e+06	359333	414873	547999	445869	857545	602337	351014	724492	786912	412544	219036	435093	0.101783	0.937875	0.986386	-0.0197753	insig
MW0111261	C11H18N4O2	Pirimicarb	Heterocyclic compounds	Heterocyclic compounds	MS2-Search-DB	0.7166	23103-98-2	252288	225314	209953	278072	360616	307146	149535	265872	304550	148023	240407	248743	327786	354844	314350	252465	273695	422345	310440	295163	337297	303748	317760	374593	290725	1.39627	0.0284289	1.24315	0.313998	insig
MEDP1436	C13H25NO4	Carnitine C6:0	FA	CAR	MS2-Search-Local	0.9222	22671-29-0	654399	318856	159841	502022	296093	379659	510620	332405	124435	283433	170206	143725	294232	222270	660922	259652	68068.3	691689	529090	172708	413812	669710	258564	158191	378164	0.281974	0.823778	0.952899	-0.0696045	insig
MW0015833	C32H46N2O8	Anthranoyllycoctonine	Benzene and substituted derivatives	Benzene and substituted derivatives	MS2-Search-DB	0.6996	22413-78-1	319339	285479	255040	343453	409423	379905	136869	325674	395891	188892	302282	313849	368845	436406	403494	308228	338462	519105	365397	366251	397502	382669	358812	486556	366908	1.33101	0.0314145	1.25325	0.325677	insig
MEDP0584	C6H5N5O	Pterine	Heterocyclic compounds	Pteridines and derivatives	MS2-Search-DB	0.6684	2236-60-4	1.91522e+06	1.28762e+06	1.77371e+06	1.74599e+06	1.81888e+06	2.2939e+06	2.17513e+06	1.46895e+06	1.49298e+06	2.00215e+06	2.47926e+06	1.99044e+06	2.59769e+06	1.74472e+06	787105	1.86799e+06	1.87618e+06	1.70832e+06	1.95425e+06	1.77201e+06	2.36023e+06	2.27552e+06	1.08116e+06	2.00708e+06	1.64945e+06	0.119823	0.624365	1.04412	0.06229	insig
MW0146493	C47H71NO12	Azaspiracid	Organic acid And Its derivatives	Organic acid And Its derivatives	MS2-Insilico	0.5623	214899-21-5	3.55743e+06	3.11689e+06	2.75965e+06	3.70757e+06	3.8102e+06	3.85718e+06	2.17477e+06	3.4483e+06	3.85391e+06	1.8351e+06	3.21773e+06	3.2071e+06	3.49908e+06	4.40748e+06	4.05452e+06	3.11713e+06	3.45856e+06	4.80722e+06	3.77117e+06	3.68617e+06	4.0899e+06	4.01373e+06	3.80359e+06	4.78407e+06	3.54881e+06	1.29075	0.0356358	1.1927	0.254236	insig
MW0168376	C45H73NO15	Solanine	Alkaloids	Alkaloids	MS2-Search-DB	0.8311	20562-02-1	2.52465e+06	2.18265e+06	1.88468e+06	2.63689e+06	2.72593e+06	2.84556e+06	1.46618e+06	2.53594e+06	2.79379e+06	1.25095e+06	2.25623e+06	2.24671e+06	2.5124e+06	3.16139e+06	2.91014e+06	2.16901e+06	2.49524e+06	3.5968e+06	2.7222e+06	2.71456e+06	2.89683e+06	2.8204e+06	2.89866e+06	3.62876e+06	2.50035e+06	1.27498	0.0375411	1.21181	0.277162	insig
MW0103836	C2H8NO3P	2-Aminoethylphosphonic acid	Organic acid And Its derivatives	Organic acid And Its derivatives	MS2-Search-DB	0.6976	2041-14-7	180096	275392	259409	264105	163004	160429	158970	152226	142521	163625	191786	142965	146267	145286	133254	132458	221852	123891	117287	137549	142792	148413	139651	117078	123595	1.54399	0.0208341	0.751519	-0.412118	insig
MW0124785	C16H21ClN4	Mepiprazole	Heterocyclic compounds	Heterocyclic compounds	MS2-Search-DB	0.8864	20326-12-9	1.13435e+07	1.04051e+07	1.44195e+07	1.56955e+07	1.16454e+07	1.06621e+07	8.18862e+06	1.02089e+07	1.49879e+07	8.96393e+06	1.21705e+07	9.07925e+06	1.09642e+07	1.12599e+07	1.18646e+07	9.60679e+06	1.74461e+07	1.41876e+07	1.05998e+07	9.71994e+06	1.23352e+07	1.29583e+07	1.07783e+07	9.77468e+06	1.0382e+07	0.0228859	0.911899	0.99054	-0.0137126	insig
MEDP1892	C14H31N	Tetradecylamine	Alcohol and amines	Amines	MS2-Search-DB	0.7039	2016-42-4	572791	441414	558239	235648	552509	573040	532360	443634	584286	600970	563292	239438	539471	541399	419629	525796	465867	528144	396572	560536	218988	407637	422565	521074	532554	0.520442	0.275122	0.900636	-0.150985	insig
MEDN0067	C18H20N2O3	Phe-Phe	Amino acid and Its metabolites	Small Peptide	MS2-Search-Local	0.9516	201023-39-4	4.21933e+06	2.30681e+06	1.41527e+06	3.50882e+06	7.8685e+06	7.51799e+06	2.89378e+06	3.0228e+06	1.72028e+06	4.62654e+06	4.0682e+06	6.17864e+06	3.3263e+07	8.465e+06	8.77699e+06	1.36003e+07	5.57417e+06	6.94281e+06	8.19174e+06	9.18289e+06	1.54662e+07	5.40261e+06	4.52931e+06	2.51453e+06	4.87069e+06	1.61416	0.0213826	2.33634	1.22425	up
MEDL02183	C11H6O4	Xanthotoxol	Heterocyclic compounds	Heterocyclic compounds	MS2-Search-DB	0.5112	2009-24-7	1159.43	2802.76	880.053	1042.1	1226.87	1982.78	1189.91	2248.58	646.596	2108.54	983.396	960.793	1469.45	760.534	1966	1067.63	1999.64	1322.83	230.934	2164.03	1762.66	696.122	1238.58	731.506	1194.8	0.56337	0.285322	0.808886	-0.305992	insig
MW0002372	C7H5Cl2NO	2,6-Dichlorobenzamide	Benzene and substituted derivatives	Benzene and substituted derivatives	MS2-Search-DB	0.6903	2008-58-4	131866	91755.8	62839.8	137799	55926.5	113718	123042	132325	67697	62917	139112	70344.5	36678.5	56661.7	94462.7	56245.6	44825.9	39556.9	84734.2	60704.6	40014.5	33535.1	42205.4	38716.8	38228.7	1.66025	0.00680359	0.596006	-0.746602	insig
MW0130916	C30H40N2O6	2-Piperidinecarboxylic acid,1-(3,3-dimethyl-1,2-dioxopentyl)-,(1R)-1-(3-aminophenyl)-3-(3,4-dimethoxyphenyl)propyl ester,(2S)-	Organic acid And Its derivatives	Organic acid And Its derivatives	MS2-Search-DB	0.8309	195513-96-3	4.02941e+06	3.49595e+06	2.93332e+06	3.948e+06	4.49129e+06	4.2924e+06	2.35592e+06	3.59947e+06	3.92448e+06	2.12394e+06	3.44282e+06	3.58792e+06	3.37995e+06	4.80745e+06	5.15081e+06	3.58961e+06	9.67273e+06	5.16691e+06	3.82559e+06	3.64648e+06	4.26344e+06	4.48992e+06	4.38454e+06	5.03384e+06	3.85151e+06	1.17685	0.0402619	1.29365	0.371449	insig
MEDP1337	C26H54NO7P	LPC(18:0/0:0)	GP	LPC	MS2-Search-Local	0.9127	19420-57-6	9.18013e+06	6.97212e+06	7.21872e+06	6.06744e+06	6.16513e+06	9.72523e+06	8.39434e+06	7.69212e+06	9.59218e+06	7.32816e+06	8.04094e+06	1.05706e+07	8.43244e+06	8.57006e+06	1.19917e+07	1.71363e+07	1.04479e+07	1.18483e+07	1.06034e+07	9.02318e+06	1.1113e+07	8.84479e+06	8.14672e+06	8.71475e+06	1.11294e+07	1.58309	0.00272141	1.31582	0.395964	insig
MEDL00392	C26H52NO7P	1-Oleoyl-sn-glycero-3-phosphocholine	GP	LPC	MS2-MetDNA	0.8929	19420-56-5	30985.1	23266.8	21824.8	20171.2	20730.2	26784.3	25247.3	19239.9	28794.5	19858.3	26514.4	24877.9	29858.6	25596.5	33112	40377.9	29775.9	31884.9	28558.6	24689.4	25550	31893.2	25529.8	26426.1	25014.5	1.48971	0.0088362	1.2091	0.273938	insig
MW0169068	C18H29NO3	Dihydrocapsaicin	Heterocyclic compounds	Heterocyclic compounds	MS2-Search-Local	0.693	19408-84-5	334837	300614	328299	184421	188618	374063	92314.1	159395	399225	284862	156990	279487	161581	203986	224862	233755	264678	256413	223209	236683	76261	169712	333470	299973	332096	0.470053	0.366687	0.869819	-0.201213	insig
MW0110553	C9H13N	(S)-(-)-N,alpha-Dimethylbenzylamine	Alcohol and amines	Amines	MS2-Search-DB	0.7314	19131-99-8	443869	150658	197075	275863	313838	461902	439995	403875	221592	549793	565055	778492	373791	416240	279276	931767	963429	512659	293775	665129	539888	547576	668980	972245	518335	1.53902	0.00175279	1.74001	0.799096	insig
MW0062208	C39H62O12	Prosapogenin A	Steroids	Steroidal saponins	MS2-Search-DB	0.9024	19057-67-1	1.73348e+06	1.47893e+06	1.06709e+06	1.54865e+06	1.83661e+06	1.78252e+06	980136	1.5542e+06	1.68144e+06	744997	1.42041e+06	1.46969e+06	1.52326e+06	2.1756e+06	2.1652e+06	1.6109e+06	3.18693e+06	2.4452e+06	1.72928e+06	1.6707e+06	1.89452e+06	1.97484e+06	1.85437e+06	2.44214e+06	1.72738e+06	1.47108	0.00650544	1.35528	0.438592	insig
MW0006549	C8Cl4N2	Chlorothalonil	Benzene and substituted derivatives	Benzene and substituted derivatives	MS2-Insilico	0.6971	1897-45-6	154333	299703	276684	295776	326708	272020	346201	288457	397618	306773	239327	320289	271253	152156	181260	37906.9	324485	315804	323565	333338	314863	363785	135330	350243	270060	0.614608	0.287738	0.884684	-0.176766	insig
MEDL01804	C9H17NO	Methylisopelletierine	Heterocyclic compounds	Heterocyclic compounds	MS2-Search-Local	0.6181	18747-42-7	184527	94761.5	97003.6	95482.6	99052.8	484028	95242.7	223322	91705.9	85744.5	104593	96328.6	124230	110084	107659	97498.8	99944.2	81975.6	87120.5	112363	96655.2	102763	91395.3	99266.3	100595	0.898742	0.202618	0.650161	-0.621132	insig
MW0126051	C15H18N4O4	PD-160725 2-hydroxyethanesulfonate	Heterocyclic compounds	Heterocyclic compounds	MS2-Search-DB	0.8692	186268-11-1	714215	673722	1.31823e+06	1.13995e+06	738960	728819	487400	665519	1.16149e+06	526772	633735	637996	567921	730128	730075	699987	1.17613e+06	766112	644092	606776	633753	810653	1.00449e+06	688085	674348	0.409441	0.425455	0.899586	-0.152667	insig
MW0158838	C33H42N4O6	Urobilin	Organic acid And Its derivatives	Organic acid And Its derivatives	MS2-Search-DB	0.5861	1856-98-0	185173	150360	117747	123405	155922	168461	214576	186386	99737.9	98246.8	348198	89694	225876	246618	124400	229331	118912	337742	159290	350274	100730	160457	285936	203600	202996	0.98928	0.0265072	1.41512	0.500925	insig
MW0009705	C13H21NO3	Salbutamol	Benzene and substituted derivatives	Benzene and substituted derivatives	MS2-Search-DB	0.6739	18559-94-9	2.6911e+06	2.60934e+06	3.65368e+06	3.60045e+06	2.75926e+06	2.52544e+06	1.93978e+06	2.22406e+06	4.10278e+06	2.17327e+06	3.31497e+06	2.25164e+06	2.81906e+06	2.58391e+06	2.97102e+06	2.41257e+06	3.34569e+06	3.24957e+06	2.81542e+06	2.68855e+06	3.15531e+06	3.60701e+06	2.81483e+06	2.54054e+06	2.55185e+06	0.269357	0.853411	1.01658	0.0237209	insig
MEDTN00646	C13H10BrN3O4	1-(2-Bromophenyl)-3-(2-hydroxy-4-nitrophenyl)urea	Benzene and substituted derivatives	Benzene and substituted derivatives	MS2-Search-DB	0.6547	182498-32-4	9644.97	12180.9	9775.26	7056.26	9992.32	8280.69	7724.41	10133.2	11634.8	12363.5	6171.4	11695.6	7133.34	7794.33	7789.57	6849.36	11497.6	9305.52	7823.86	9979.48	9554.46	9797.34	9690.08	7002.51	8921	0.888787	0.129158	0.884099	-0.17772	insig
MW0137085	C19H16O5	7-Hydroxywarfarin	Heterocyclic compounds	Heterocyclic compounds	MS2-Search-DB	0.7157	17834-03-6	1.00064e+07	9.96464e+06	9.70234e+06	1.0004e+07	1.07054e+07	1.07119e+07	9.38461e+06	1.04903e+07	9.60309e+06	1.09925e+07	1.08595e+07	8.8516e+06	9.97443e+06	1.00858e+07	8.97683e+06	9.20334e+06	9.76048e+06	9.3106e+06	1.01403e+07	9.34373e+06	9.62947e+06	9.40175e+06	1.09796e+07	9.34403e+06	9.45504e+06	1.04465	0.0584625	0.953848	-0.0681691	insig
MW0006136	C17H21NO4S4	Bensultap	Benzene and substituted derivatives	Benzene and substituted derivatives	MS2-Search-DB	0.5091	17606-31-4	130104	147812	123926	104911	128856	119439	111123	133340	155444	151708	102390	143177	114912	125715	111216	110875	145379	135249	114565	132626	130318	134596	131458	107974	127301	0.541659	0.347698	0.952935	-0.0695497	insig
MW0106489	C4H10N2O2	DL-2,4-Diaminobutyric acid	Organic acid And Its derivatives	Organic acid And Its derivatives	MS2-Search-DB	0.6765	1758-80-1	620923	402497	454190	1.19022e+06	433054	375410	1.25064e+06	605970	1.14923e+06	410574	408404	386484	422003	442504	433053	1.19511e+06	451014	356620	1.08034e+06	392590	290198	940758	455894	465069	442261	0.641147	0.298552	0.789463	-0.341056	insig
MEDP0338	C24H50NO7P	1-Palmitoyl-sn-glycero-3-phosphocholine	GP	LPC	MS2-Search-Local	0.8526	17364-16-8	3.33363e+07	3.46975e+07	3.42641e+07	3.14393e+07	3.10871e+07	3.91621e+07	3.45432e+07	3.39577e+07	3.47093e+07	2.72485e+07	3.76932e+07	3.64363e+07	3.67585e+07	3.2946e+07	3.96281e+07	4.47785e+07	4.00919e+07	4.11451e+07	3.8943e+07	3.81378e+07	3.64334e+07	3.42943e+07	2.82717e+07	3.35588e+07	3.28947e+07	1.11941	0.0280746	1.10035	0.137966	insig
MEDP1665	C10H19NO4	Carnitine C3:0	FA	CAR	MS2-Search-Local	0.9176	17298-37-2	3.86454e+06	2.6937e+06	2.61482e+06	2.92704e+06	2.90551e+06	3.58099e+06	2.25391e+06	2.87595e+06	3.31827e+06	2.53407e+06	1.77388e+06	2.73939e+06	1.81879e+06	2.56125e+06	3.51212e+06	1.42039e+06	2.83292e+06	3.14221e+06	2.42401e+06	3.55376e+06	3.76439e+06	2.48569e+06	2.10116e+06	2.30094e+06	1.92821e+06	0.87382	0.109892	0.864855	-0.209469	insig
MEDN1024	C6H11NO2	D-piperidine acid	Heterocyclic compounds	Heterocyclic compounds	MS2-Search-Local	0.9433	1723-00-8	378577	320302	285116	477683	419557	327792	222412	92821.4	489264	493518	599496	801148	155792	261012	332040	350937	140472	208015	169952	117589	310979	219572	149680	123166	160324	0.909879	0.241662	0.779417	-0.359532	insig
MW0016119	C3H9O6P	Glucerol 2-phosphate	GP	GP	MS2-Search-Local	0.7429	17181-54-3	276387	271761	286153	274195	234530	263805	466432	224458	205823	433264	298937	211844	197732	394238	350757	270608	215631	366683	221901	179089	470478	257205	259785	407977	231250	0.0721334	0.895646	0.983861	-0.0234743	insig
MW0006389	C21H24O4	Bisphenol A diglycidyl ether	Benzene and substituted derivatives	Benzene and substituted derivatives	MS2-Search-DB	0.8009	1675-54-3	124032	131463	77409.5	96475.3	112627	100980	70126.8	135930	117261	56160.8	121940	105567	93519.9	179176	166577	118361	134186	246865	143162	124631	105756	163982	167926	180003	144377	1.51865	0.0029504	1.43185	0.517882	insig
MW0049152	C6H12N2O3	Daminozide	FA	Others	MS2-Search-DB	0.7161	1596-84-5	979339	1.0628e+06	1.25192e+06	1.0894e+06	1.10295e+06	936665	1.36997e+06	1.08727e+06	1.00342e+06	1.5622e+06	1.16302e+06	1.03738e+06	1.15539e+06	997457	1.10966e+06	1.04483e+06	1.03147e+06	849756	1.01353e+06	1.10335e+06	1.00197e+06	1.039e+06	1.17986e+06	805945	1.08817e+06	0.900472	0.150201	0.90983	-0.136332	insig
MW0148480	C44H84NO7P	Dihomo--Linolenoyl PAF C-16	GP	PC	MS2-Search-DB	0.758	155575-01-2	654413	2.36178e+06	8.6064e+06	6.37352e+06	844480	2.03273e+06	595754	788049	664565	635984	1.391e+06	951985	801849	335415	454928	194043	180748	296249	222717	692115	568123	328216	329660	280879	653930	1.69403	0.0696489	0.217391	-2.20163	insig
MW0106122	C5H9Cl2N3O2	Carmustine	Alcohol and amines	Amines	MS2-Search-DB	0.5757	154-93-8	738759	776774	276043	938815	924873	959682	931621	932664	1.1366e+06	1.03431e+06	892405	1.04671e+06	895002	219473	1.07721e+06	821445	246882	972182	889182	901872	866426	841004	864022	863251	825574	0.288821	0.614963	0.941999	-0.0862027	insig
MEDP0593	C5H5N5S	Thioguanine	Nucleotide And Its metabolites	Nucleotide and Its metabolites	MS2-Search-DB	0.5327	154-42-7	219237	143692	99814.8	218594	205235	224981	197450	98308.6	411294	292287	203615	154151	162495	158417	324013	185216	203769	199137	134460	168576	207712	190715	201573	155107	197836	0.183316	0.509687	0.89908	-0.153479	insig
MW0108974	C8H24N4O3P2	Schradan	Alcohol and amines	Amines	MS2-Search-DB	0.7218	152-16-9	172409	297225	133357	186976	217859	306936	150641	188681	328169	95508.1	178256	273976	92525.1	154181	161714	159340	128640	210690	203330	143835	89439.3	212099	204849	46118.1	67557	1.0032	0.0945623	0.746492	-0.4218	insig
MW0159763	Na3AlF6	Cryolite	Heterocyclic compounds	Heterocyclic compounds	MS2-Insilico	0.7205	15096-52-3	1.90039e+06	2.06858e+06	591131	2.28345e+06	2.28998e+06	2.41379e+06	2.25745e+06	2.2445e+06	1.02433e+06	1.13038e+06	2.36931e+06	348250	2.1196e+06	927649	988361	2.02159e+06	754727	943424	2.25962e+06	471205	2.19842e+06	2.18478e+06	2.24359e+06	2.12048e+06	1.00101e+06	0.519007	0.318187	0.84055	-0.250594	insig
MEDP1574	C9H9NO	3-Methyloxindole	Heterocyclic compounds	Indole and Its derivatives	MS2-Search-Local	0.6508	1504-06-9	387928	234664	506390	104042	242952	86835.9	91830.3	122697	83208.6	86648.4	379811	472408	112959	209991	86543.1	135095	91942.7	79549.8	125155	229133	658052	384566	221493	134337	90043	0.28513	0.617942	1.16786	0.223867	insig
MW0106523	C9H11NO3	DL-O-tyrosine	Amino acid and Its metabolites	Amino acids	MS2-Search-Local	0.9633	150-30-1	2.55548e+07	2.98458e+07	2.65914e+07	2.7437e+07	2.72967e+07	2.99092e+07	2.50929e+07	2.65369e+07	2.81267e+07	2.59461e+07	2.61046e+07	2.80629e+07	3.05361e+07	3.13888e+07	2.75642e+07	2.61634e+07	2.58944e+07	2.69065e+07	2.36827e+07	3.37082e+07	2.88563e+07	2.54063e+07	2.96031e+07	2.3211e+07	2.62948e+07	0.251476	0.723258	1.01194	0.0171222	insig
MW0015543	C9H17NO4	Acetyl-L-carnitine	FA	CAR	MS2-Search-Local	0.9712	14992-62-2	1.08256e+07	6.81365e+06	4.56705e+06	8.05816e+06	5.01653e+06	7.51029e+06	8.6115e+06	6.49542e+06	5.4089e+06	7.37099e+06	3.36611e+06	5.44288e+06	6.12065e+06	6.00469e+06	8.4277e+06	5.17844e+06	3.13194e+06	1.10943e+07	8.44748e+06	6.28817e+06	7.35758e+06	1.06475e+07	6.23978e+06	5.3472e+06	9.35811e+06	0.235265	0.782691	0.966377	-0.0493416	insig
MW0118785	C5H10OS	2-Methylthiolan-3-ol	Heterocyclic compounds	Heterocyclic compounds	MS2-Search-DB	0.6938	149834-43-5	3.64756e+06	5.17293e+06	1.48836e+06	1.53676e+06	1.78994e+06	5.69259e+06	5.20004e+06	1.3708e+06	4.91821e+06	1.54558e+06	5.17267e+06	5.16343e+06	5.11748e+06	1.30095e+06	5.09642e+06	76363.5	796239	1.23676e+06	4.50181e+06	480254	3.7552e+06	5.27219e+06	3.75881e+06	696561	6.05007e+06	0.468492	0.995541	0.99858	-0.00205031	insig
MW0055444	C15H29NO4	Octanoylcarnitine	FA	Others	MS2-Search-DB	0.9539	14919-35-8	3.48218e+06	2.65609e+06	516108	2.79178e+06	1.54818e+06	1.7183e+06	1.39649e+06	1.40983e+06	414288	1.06846e+06	966100	163723	1.1513e+06	1.08232e+06	3.74555e+06	1.02282e+06	234845	4.88077e+06	3.17912e+06	686438	1.23557e+06	4.38184e+06	1.06189e+06	472378	1.98142e+06	0.271192	0.922915	1.02916	0.041462	insig
MW0105574	C4H9N3O3	Albizziin	Organic acid And Its derivatives	Organic acid And Its derivatives	MS2-Search-DB	0.6795	1483-07-4	696358	665164	637917	675571	651483	701765	707518	617973	725858	652724	743270	688839	1.06222e+06	635795	779531	204656	220636	468888	212582	415861	367043	565881	383988	392949	347433	1.29874	0.015924	0.741651	-0.431187	insig
MEDP1060	C9H7NO	Hydroxyquinoline	Heterocyclic compounds	Heterocyclic compounds	MS2-Search-Local	0.8605	148-24-3	3.73216e+06	5.23216e+06	3.6701e+06	4.83465e+06	4.50794e+06	4.06799e+06	3.88897e+06	3.85471e+06	5.3246e+06	2.90761e+06	4.1716e+06	4.4609e+06	6.67028e+06	6.33419e+06	3.90381e+06	5.33043e+06	4.26756e+06	4.4065e+06	4.01418e+06	5.53978e+06	4.07059e+06	4.42222e+06	5.4342e+06	3.03653e+06	4.14084e+06	0.804333	0.184964	1.11379	0.155477	insig
MW0169698	C5H9NO2	Proline	Amino acid and Its metabolites	Amino acids	MS2-Search-Local	0.946	147-85-3	414287	191061	239585	202467	209715	259343	194336	399756	244140	501233	328345	233851	196049	275818	251813	369340	219519	205871	233158	224234	335512	239773	244410	286858	293866	0.217323	0.550359	0.919356	-0.121304	insig
MW0110915	C44H82NO6PS	Arachidonoyl thio-PC	Benzene and substituted derivatives	Benzene and substituted derivatives	MS2-Search-DB	0.7899	146797-82-2	1.93953e+06	1.46656e+06	5.01047e+06	2.78918e+06	2.96321e+06	7.81278e+06	1.61765e+06	5.60862e+06	2.58495e+06	1.27544e+06	765952	268527	213026	661950	296459	300444	985851	1.13194e+06	445291	5.25858e+06	882426	2.91458e+06	2.96735e+06	852908	1.8246e+06	1.57685	0.0216751	0.398565	-1.32711	down
MW0054004	C5H4N4O	Hypoxanthine	Heterocyclic compounds	Heterocyclic compounds	MS2-Search-Local	0.9582	146469-94-5	4.45401e+06	3.49397e+06	4.03271e+06	820084	1.04392e+06	5.06109e+06	784745	1.39624e+06	879351	5.22507e+06	2.15485e+06	2.22686e+06	9.40178e+06	1.28187e+07	7.69469e+06	5.4002e+06	3.59116e+06	2.02727e+06	1.31595e+06	8.14771e+06	4.63764e+06	2.86372e+06	2.52819e+06	689250	375159	0.674079	0.146117	1.61506	0.69159	insig
ZINC6021239	C2H2O4	Oxalic acid	Organic acid And Its derivatives	Organic acid And Its derivatives	MS2-Search-DB	0.6519	144-62-7	275385	266524	292250	255058	274425	313812	282712	294234	258854	257476	218161	275400	237227	296572	305088	312502	291828	251386	325374	381175	483666	336173	299504	338068	311821	0.983399	0.0676815	1.12219	0.166323	insig
MW0159670	NaHCO3	Sodium bicarbonate	Others	Metal, Non-metal and related compounds	MS2-Insilico	0.6852	144-55-8	312762	286814	727074	387243	744849	172473	724142	586164	666962	294618	499851	289908	702216	585796	198933	274068	562055	236656	189744	242517	812127	304272	790290	261072	826823	0.238518	0.684878	0.921366	-0.118153	insig
MW0116263	C15H14N4O	N-(1-Methyl-5-indolyl)-N'-(3-pyridyl)urea	Heterocyclic compounds	Heterocyclic compounds	MS2-Search-DB	0.7092	143797-63-1	103960	67507.1	35191.9	50931.6	69571.1	83048.5	54948	78788.4	39771.8	30356.4	40346.4	18014	50882.7	53242.5	8882.76	35015.9	58715.7	62653.7	58692.4	37418.1	30916.7	24855.5	69583.4	55602.2	42045.3	0.995189	0.0519573	0.702268	-0.509907	insig
MEDP1584	C6H13NO5	2-Amino-2-deoxymannose	Nucleotide And Its metabolites	Nucleotide and Its metabolites	MS2-Search-Local	0.5409	14307-02-9	503322	556927	402291	518690	426455	492978	419995	248687	336762	560114	452397	458066	492818	490668	253266	430108	383450	429936	361352	384668	939786	440271	499182	329559	387166	0.0219591	0.965084	1.00498	0.00716563	insig
MW0118913	C4H4N2OS	2-Thiouracil	Heterocyclic compounds	Heterocyclic compounds	MS2-Search-DB	0.7308	141-90-2	518902	242011	433359	428138	122468	418301	338372	207641	229472	436875	235610	447931	301314	131411	412940	345892	347786	421961	308868	155531	338097	169310	142460	462315	300354	0.412473	0.481249	0.893049	-0.163189	insig
MW0114564	C2H4O2	Glycolaldehyde	Aldehyde,Ketones,Esters	Aldehydes	MS2-Search-DB	0.52	141-46-8	123538	121898	109873	125771	131940	122697	131930	139267	142501	156534	162814	152569	162761	165616	173485	163551	175523	166037	173189	160487	169171	165646	163292	176168	162624	2.41425	3.93226e-06	1.2726	0.347783	insig
MW0169936	C9H8O2	Cinnamic acid	Organic acid And Its derivatives	Organic acid And Its derivatives	MS2-Search-DB	0.7804	140-10-3	866953	1.03942e+06	910333	959946	970391	1.00334e+06	893609	953197	985355	913554	906507	984506	1.11077e+06	1.11247e+06	974950	906503	937705	945538	850082	1.12916e+06	1.04045e+06	903486	1.0615e+06	816341	926921	0.486143	0.432824	1.02547	0.0362807	insig
MW0106102	C9H15NO3S	Captopril	Organic acid And Its derivatives	Organic acid And Its derivatives	MS2-Search-DB	0.6843	138452-88-7	487389	444874	379139	419427	439669	399568	396617	375458	406962	422898	399838	457537	395160	369734	347270	353874	336357	264208	170634	657742	388583	395063	362519	337880	346523	0.816628	0.132346	0.892125	-0.164682	insig
MW0169814	C13H18O7	Salicin	Benzene and substituted derivatives	Benzene and substituted derivatives	MS2-Search-DB	0.7154	138-52-3	426822	419099	410753	425522	477968	453461	403463	468573	432596	430485	429952	389791	443845	434074	377727	385827	416106	398485	450030	415803	407302	413601	456548	396510	403992	1.04131	0.0543959	0.95347	-0.0687404	insig
MW0109254	C3H5O6P	Phosphoenolpyruvate	Organic acid And Its derivatives	Organic acid And Its derivatives	MS2-MetDNA	0.8547	138-08-9	4466.18	4561.14	6732.8	8645.84	3445.48	3037.31	4418.19	1414.8	8165.51	9184.65	10216.9	7065.97	1693.72	1573.15	8061.64	4460.31	6295.08	1556.41	2132.88	3130.26	1944	2268.84	3435.99	4599.12	5247.4	0.799141	0.295052	0.785148	-0.348963	insig
MW0118552	C30H44N6O2	2H-1-Benzopyran-6-ol,2-((4-(2,6-di-1-pyrrolidinyl-4-pyrimidinyl)-1-piperazinyl)methyl)-3,4-dihydro-2,5,7,8-tetramethyl-,dihydrochloride,(2R)-	Others	Others	MS2-Search-DB	0.7187	137018-55-4	4.75801e+06	4.23704e+06	3.48787e+06	3.1514e+06	3.65694e+06	3.7576e+06	4.52776e+06	5.2369e+06	6.06737e+06	5.87186e+06	3.56753e+06	6.20913e+06	3.64098e+06	4.26307e+06	6.39335e+06	6.06992e+06	6.73948e+06	5.40819e+06	5.96455e+06	5.75999e+06	4.41391e+06	4.77187e+06	4.9148e+06	7.48594e+06	6.57766e+06	1.09571	0.0327993	1.22421	0.291855	insig
MW0007503	C14H22N2O	Lidocaine	Benzene and substituted derivatives	Benzene and substituted derivatives	MS2-Search-DB	0.9718	137-58-6	8.35924e+07	9.04515e+07	8.6588e+07	8.19007e+07	9.11648e+07	8.25068e+07	8.33478e+07	8.27282e+07	8.19463e+07	9.02888e+07	8.49421e+07	7.71304e+07	8.16971e+07	8.32402e+07	7.72658e+07	7.69966e+07	7.55391e+07	7.52988e+07	7.91835e+07	7.9311e+07	8.15521e+07	7.89546e+07	8.03824e+07	7.60729e+07	7.68357e+07	1.91622	0.000327997	0.924034	-0.113981	insig
MW0002191	C9H13N	2,4,5-Trimethylaniline	Benzene and substituted derivatives	Benzene and substituted derivatives	MS2-Search-DB	0.8861	137-17-7	266379	247627	237841	542210	258155	252655	592274	294066	292892	315685	309819	544491	522867	494790	332206	422361	335021	317199	463976	294201	309036	522292	485072	316484	301316	1.02305	0.171779	1.20637	0.27067	insig
MW0010168	H2O3S2	Thiosulfuric acid	Others	Metal, Non-metal and related compounds	MS2-Insilico	0.6895	13686-28-7	166331	289483	218546	273721	391361	390293	232947	230953	135089	230473	219203	215673	145933	165007	273913	256553	361074	242710	298899	130378	326666	281586	156724	410821	162795	0.26231	0.714539	0.950282	-0.073573	insig
MEDL00773	C13H16N2O5	L-Aspartyl-L-Phenylalanine	Amino acid and Its metabolites	Amino acid and Its metabolites	MS2-Search-Local	0.9008	13433-09-5	318255	148526	39544.1	216752	641935	773983	183701	296941	169444	315660	227061	644545	2.46166e+06	826212	1.11273e+06	1.63285e+06	798793	407356	627768	507399	1.58471e+06	429959	183216	109285	145246	1.26964	0.0212416	2.51203	1.32885	up
MW0062139	C27H44O6	Ponasterone A	Hormones and hormone related compounds	Hormones and hormone related compounds	MS2-Search-DB	0.7239	13408-56-5	74489.5	61528.6	27574.3	41674.2	36456.4	49044.3	58489.7	41305.6	42088.5	88129.6	84636.7	57570.2	49415.3	100404	75926.4	80014.4	49635.9	106496	62604.9	100658	88729.9	65010.7	71113	83999.2	52005.7	1.55723	0.00684787	1.44427	0.530339	insig
MW0111276	C12H21N	Rimantadine	Alcohol and amines	Amines	MS2-Search-DB	0.7197	13392-28-4	150698	151769	224579	204535	115917	184500	139202	138582	146733	130892	204812	121523	205744	232574	111013	119416	196746	181154	140473	147343	273399	158137	167704	128341	101691	0.232255	0.669071	1.04576	0.0645518	insig
MADP0533	C26H41N3O5	MG-132	Benzene and substituted derivatives	Benzene and substituted derivatives	MS2-Search-Local	0.5823	133407-82-6	4.61665e+06	3.9802e+06	3.66729e+06	4.69118e+06	5.48354e+06	5.01377e+06	2.68829e+06	4.30994e+06	5.00791e+06	2.60407e+06	3.80385e+06	4.16367e+06	4.24522e+06	5.58879e+06	6.2933e+06	4.10789e+06	1.26805e+07	6.48261e+06	4.76134e+06	4.71492e+06	5.23122e+06	5.13802e+06	5.70419e+06	6.26121e+06	4.92137e+06	1.21123	0.0374762	1.3329	0.414565	insig
MW0108101	C12H26N4O3	Lysyl-Lysine	Amino acid and Its metabolites	Small Peptide	MS2-Search-Local	0.6222	13184-13-9	1.15487e+07	1.10014e+07	1.11288e+07	1.11881e+07	1.1659e+07	1.11726e+07	1.08401e+07	1.07813e+07	1.06271e+07	1.15903e+07	1.15863e+07	1.04855e+07	1.16116e+07	1.13845e+07	1.08371e+07	1.03573e+07	1.09261e+07	1.06501e+07	1.09881e+07	1.07507e+07	1.10671e+07	1.06462e+07	1.11259e+07	1.02938e+07	1.08646e+07	0.848981	0.120095	0.977698	-0.0325387	insig
MW0103994	C5H8O5	(S)-2-Hydroxyglutaric acid	Organic acid And Its derivatives	Organic acid And Its derivatives	MS2-Search-DB	0.7114	13095-48-2	300013	344663	352632	334404	321690	271189	361576	318326	334806	341776	330371	309568	231537	311842	327029	329271	291567	307297	342797	230186	243185	388636	352713	332298	364928	0.698637	0.31397	0.953595	-0.0685513	insig
MEDL00873	CH4N2O2	Hydroxyurea	Alcohol and amines	Amines	MS2-Search-Local	0.8238	127-07-1	628297	770513	769530	716496	821461	614812	571121	695045	795683	491485	564523	748267	519505	924636	594228	419059	330855	382233	269199	983981	484607	394968	361009	326041	337650	1.31177	0.0136269	0.740982	-0.432489	insig
MW0123178	C10H16N2O3	Butabarbital	Heterocyclic compounds	Heterocyclic compounds	MS2-Search-DB	0.6741	125-40-6	178544	222352	240867	264365	202978	322808	319487	177425	187133	512674	256496	352320	221814	163417	150623	241738	183300	149221	171671	317911	184694	198227	188530	96018.2	202783	0.997328	0.138688	0.780828	-0.356923	insig
MW0013615	C42H80NO10P	2-Oleoyl-1-stearoyl-sn-glycero-3-phosphoserine	GP	PC	MS2-Search-DB	0.5132	124262-93-7	311322	156984	245913	268986	320976	78564.4	238271	318622	413365	220450	289730	178161	353207	497131	346799	186825	192715	654340	355781	264884	157037	548238	602274	187997	640477	0.809962	0.0667448	1.4133	0.499069	insig
MW0111235	C18H39N	Octadecylamine	Alcohol and amines	Amines	MS2-Search-DB	0.6401	124-30-1	21560.7	24201.8	26099.4	23467.7	22565.3	31389.8	38923.4	29437.7	35620.3	52082.4	26462.6	38200.9	28395.2	28618.4	27326.8	64314.1	35990.8	34246.7	36541	56486	22747.1	21439.1	23763.7	26785.8	33517.1	0.404716	0.479746	1.10221	0.140394	insig
MW0063802	C14H28O	Tetradecanal	FA	Others	MS2-Search-DB	0.6786	124-25-4	240739	269533	264448	263096	252573	496488	240292	244767	262044	273836	287786	270468	258676	335942	335689	254950	303378	499463	257192	285047	255568	242195	287043	259206	488561	0.495169	0.40312	1.09721	0.133846	insig
MW0107859	C5H8O3	Levulinic acid	Organic acid And Its derivatives	Organic acid And Its derivatives	MS2-Search-DB	0.6688	123-76-2	1.44407e+06	1.32682e+06	1.13625e+06	1.36008e+06	1.31885e+06	1.35072e+06	1.40763e+06	1.12061e+06	1.38792e+06	1.16834e+06	1.29036e+06	1.32642e+06	2.19681e+06	1.34297e+06	1.46507e+06	532416	2.22048e+06	2.32756e+06	369621	1.48505e+06	889998	2.73073e+06	854412	379049	371317	0.445907	0.935492	1.01282	0.0183734	insig
MEDP1049	C8H10O2	2-Phenoxyethanol	Alcohol and amines	Alcohols	MS2-Search-DB	0.6293	122-99-6	7.80983e+06	6.40266e+06	560822	7.76464e+06	7.54852e+06	745068	7.63154e+06	2.08836e+06	7.43283e+06	1.26885e+06	7.86488e+06	7.64033e+06	4.82967e+06	8.26232e+06	4.72283e+06	1.83372e+06	1.88941e+06	694606	931920	1.58462e+06	8.25645e+06	3.32412e+06	8.17712e+06	8.24077e+06	8.25897e+06	0.199791	0.895276	1.03563	0.0505032	insig
MW0013052	C29H56NO9P	2-(5-Oxovaleryl)phosphatidylcholine	GP	PC	MS2-Search-DB	0.8974	121324-31-0	157793	175541	72279.6	13494	65946.8	86989.4	76825.5	32322.7	48843.4	34918.7	82012.1	24015.2	53461.1	129482	19096.5	50018.4	10349	85466	102497	67566	112768	58685.1	28662.3	47474.9	101221	0.208411	0.552857	0.847785	-0.23823	insig
MW0111163	C8H11N	N,N-Dimethylaniline	Benzene and substituted derivatives	Benzene and substituted derivatives	MS2-Search-DB	0.895	121-69-7	1.05147e+07	1.66413e+07	2.66317e+07	1.72852e+07	2.66513e+07	2.58576e+07	2.57537e+07	2.67687e+07	2.86347e+07	2.83723e+07	2.86152e+07	2.82436e+07	2.828e+07	2.82847e+07	2.89406e+07	2.53358e+07	7.83109e+06	2.61436e+07	1.12461e+07	2.63553e+07	2.95335e+07	2.63726e+07	1.03087e+07	2.46766e+07	2.52725e+07	0.00869704	0.889225	1.01651	0.0236244	insig
MW0110000	C8H15NO2	Tranexamic acid	Organic acid And Its derivatives	Organic acid And Its derivatives	MS2-Search-DB	0.7247	1197-18-8	85208.6	194463	64716.5	35386.3	37959.9	126336	45956.4	50952.8	61544.7	61782	103169	218693	301247	135394	35814.1	40507.1	79660.3	214490	54662.8	561979	78999	117657	133032	135004	88775	1.11077	0.0577681	2.00538	1.00387	insig
MW0007780	C8H8O3	Methyl salicylate	Benzene and substituted derivatives	Benzene and substituted derivatives	MS2-Search-DB	0.8833	119-36-8	111688	103646	90588.8	94273.7	99746.9	92998.7	103169	99894.6	114940	114257	120823	121119	124537	132590	114118	110474	118885	111319	120157	111843	107024	112163	115478	118148	115461	1.91563	0.000437607	1.14068	0.18989	insig
MEDP0685	C4H9NO2S	Methylcysteine	Amino acid and Its metabolites	Amino acids	MS2-Search-Local	0.716	1187-84-4	156649	166608	177713	213253	221480	153096	143093	226855	135915	139429	169179	198618	156535	289515	208359	142261	185801	159312	170628	183890	151270	218252	228232	148438	198831	0.521274	0.362752	1.07996	0.110976	insig
MEDN1870	C25H37N3O5	BW-A868C	Benzene and substituted derivatives	Benzene and substituted derivatives	MS2-Search-DB	0.6455	118675-50-6	467542	408696	373559	479035	556588	503429	272572	436274	531005	267668	396015	436839	433905	584129	648863	419158	1.42053e+06	690254	476970	488951	520319	528546	578072	643332	498851	1.20363	0.0426731	1.36002	0.44363	insig
MW0111340	C3H9NO	Trimethylamine oxide	Alcohol and amines	Amines	MS2-Search-Local	0.6963	1184-78-7	361098	176017	158795	292948	498692	135861	63407	98561.8	285513	379297	106186	160402	838242	233263	396776	160836	167986	452015	349022	222656	480161	144702	232545	187434	128229	0.44591	0.566477	1.15922	0.21315	insig
MW0110487	C5H10N2O7P2	Zoledronic acid	Organic acid And Its derivatives	Organic acid And Its derivatives	MS2-Search-DB	0.687	118072-93-8	627082	647329	620790	577227	557349	572601	663806	592184	661275	642453	597387	656420	539005	530758	618458	290363	602277	580378	578025	573695	560809	574553	502566	516288	582873	1.10413	0.0190484	0.89838	-0.154603	insig
MW0006467	C20H30N2O4	Calpeptin	Benzene and substituted derivatives	Benzene and substituted derivatives	MS2-Search-DB	0.6818	117591-20-5	1.69502e+06	1.5653e+06	1.92689e+06	2.10497e+06	1.79106e+06	1.62646e+06	1.1633e+06	1.562e+06	2.33508e+06	1.28512e+06	1.56221e+06	1.50681e+06	1.63017e+06	1.87519e+06	1.92603e+06	1.5981e+06	3.41823e+06	2.26669e+06	1.69431e+06	1.76231e+06	1.91441e+06	1.95042e+06	2.12511e+06	1.85563e+06	1.81216e+06	0.800236	0.190301	1.12958	0.175784	insig
MEDP1271	C16H22O4	Bis(2-ethylhexyl) phthalate	Aldehyde,Ketones,Esters	Esters	MS2-Search-Local	0.9498	117-81-7	476579	394956	389020	387019	417644	396635	417884	406113	456212	458507	456252	517803	479397	480575	479257	478649	466727	441830	418075	435092	403660	423402	442828	511984	411899	1.28907	0.0146423	1.08675	0.120015	insig
MW0013571	C5H10O2	2-Methylbutanoic acid	Organic acid And Its derivatives	Organic acid And Its derivatives	MS2-Search-DB	0.7114	116-53-0	98958.7	90736.7	93148.9	93927.7	201985	88471	82909.4	205764	86054.3	98006.4	84743	88623.9	82569.3	83799.6	83038.3	89483.5	82337	74872.6	86837.1	78629.4	88062.1	85571.6	82206.8	83098.6	89322.6	1.35113	0.0797245	0.738735	-0.43687	insig
MEDP1045	C33H34N4O6	Biliverdin	Tryptamines,Cholines,Pigments	Pigments	MS2-Search-DB	0.7531	114-25-0	125743	179895	69560.5	303203	179895	172758	251896	233685	270794	86876	141496	261892	125698	51572.8	244122	155688	294228	322365	233340	76922.6	74161.8	174164	132339	38338.1	18775.4	0.697301	0.384786	0.834123	-0.261667	insig
MW0127427	C11H21NOS	Cycloate	Heterocyclic compounds	Heterocyclic compounds	MS2-Search-DB	0.5497	1134-23-2	909337	944098	943768	997396	796612	986372	977028	882740	871498	859999	998154	834009	812021	832489	813506	855649	759988	768984	801892	794346	892216	897440	852946	706778	829932	1.54329	0.00414215	0.905265	-0.143588	insig
MW0052616	C22H42O2	Erucic acid	FA	FFA	MS2-MetDNA	0.9073	112-86-7	2859.18	609.504	350.804	390.07	323.333	87.3127	1086.99	855.893	1243.79	2444.66	1194.78	1360.57	2337.42	5591.05	1064.48	3089.57	2270.74	2014.95	974.54	793.984	1737.05	1953.13	1605.64	1017.9	4119.12	1.47805	0.0290314	2.02408	1.01727	up
MW0012353	C22H43NO	13Z-Docosenamide	FA	Oxidized lipids	MS2-MetDNA	0.8872	112-84-5	1203.55	484.119	619.551	640.617	884.638	887.16	588.527	38.1959	394.688	474.269	63.5377	373.297	897.509	2384.87	781.516	482.233	184.719	135.9	402.549	505.412	53.2942	392.21	166.506	536.342	1429.87	0.367871	0.851985	0.942808	-0.0849647	insig
MW0115350	C8H18O5	Tetraethylene glycol	Alcohol and amines	Alcohols	MS2-Search-DB	0.7707	112-60-7	153969	136723	147135	177257	212552	171698	79318.2	148181	197347	89007.8	139866	147033	168386	203133	180320	140837	183629	226457	168861	166717	182190	181372	163861	244630	164933	1.08319	0.110866	1.1729	0.230078	insig
MW0054909	C17H34O2	Methyl palmitate	FA	Others	MS2-Search-DB	0.7205	112-39-0	139807	50674.6	131875	86980.9	132059	110368	114575	66598.6	87994	61773.8	67942.9	88493.2	89339.1	78129.1	61634.8	293127	90339.3	90034.7	82477.5	73300.8	49355.8	36425.5	48539.2	40310.7	44287.4	0.802797	0.404112	0.836966	-0.256759	insig
MW0150748	C11H22O2	Undecanoic acid	FA	FFA	MS2-Search-DB	0.5909	112-37-8	256206	270897	154875	242813	259878	197447	319661	357942	181562	177347	314913	181280	381003	384031	183404	163936	247430	216362	172777	191803	159120	148545	142687	242565	154313	0.494552	0.442618	0.905243	-0.143623	insig
MW0102906	C6H6O4	trans-trans-Muconic acid	FA	FFA	MS2-Search-DB	0.5292	1119-72-8	4.01075e+06	5.06738e+06	4.81154e+06	4.91087e+06	3.92343e+06	4.66991e+06	1.45712e+07	3.80322e+06	1.52118e+07	3.9215e+06	1.49555e+07	5.06239e+06	3.25542e+06	3.36696e+06	3.81313e+06	4.85079e+06	1.2409e+07	4.32608e+06	4.18333e+06	3.82182e+06	3.03982e+06	4.42754e+06	4.04718e+06	3.83655e+06	3.51057e+06	0.619602	0.472903	0.81052	-0.30308	insig
MW0011404	C18H30O	Farnesylacetone	Aldehyde,Ketones,Esters	Ketones	MS2-Search-DB	0.5936	1117-52-8	298431	384461	354712	301344	319605	368462	543820	411073	382451	501935	552078	439436	1.49084e+06	894241	531219	416120	588306	341206	350600	354452	307420	350786	320514	200504	350112	0.550539	0.210854	1.29113	0.368636	insig
MW0012808	C7H16O	1-Heptanol	Alcohol and amines	Alcohols	MS2-Search-DB	0.6954	111-70-6	993925	1.07072e+06	1.89487e+06	1.78318e+06	968763	934620	2.01935e+06	850243	1.70829e+06	1.95384e+06	1.05855e+06	1.67911e+06	1.00651e+06	1.59554e+06	831600	1.74627e+06	950902	1.43019e+06	1.61808e+06	801959	963478	1.6553e+06	852619	661047	1.61653e+06	0.583937	0.327528	0.868385	-0.203594	insig
MW0054875	C9H18O2	Methyl octanoate	FA	Others	MS2-Search-DB	0.5116	111-11-5	53208.8	61942.9	61482.1	51380.9	59283.7	78681.5	83643.5	83368.7	80384.2	71723.3	81820.5	81647.8	196672	161410	85830.5	63849.6	128499	84103.3	74925.4	82167.9	61768.8	55090.2	57190	53964.4	60345.9	0.854725	0.0971693	1.29352	0.371302	insig
ZINC5133329	C6H6O	Phenol	Benzene and substituted derivatives	Phenolics	MS2-Search-DB	0.6953	108-95-2	199896	319533	204156	216380	216651	219903	203061	210407	207942	224051	223890	192243	238828	222150	201692	199715	217203	210701	209168	222488	221647	212962	242343	207379	213864	0.256769	0.590866	0.970988	-0.0424744	insig
MEDP0669	C6H6ClN	3-Chloroaniline	Benzene and substituted derivatives	Benzene and substituted derivatives	MS2-Search-Local	0.9027	108-42-9	1.78259e+07	1.8213e+07	1.72682e+07	1.74616e+07	1.78629e+07	1.80946e+07	1.68937e+07	1.71168e+07	1.73228e+07	1.7554e+07	1.79513e+07	1.59382e+07	1.75646e+07	1.78752e+07	1.65599e+07	1.62273e+07	1.72012e+07	1.62858e+07	1.63042e+07	1.68975e+07	1.7554e+07	1.64729e+07	1.72969e+07	1.53806e+07	1.58613e+07	1.36213	0.00332637	0.954259	-0.0675467	insig
MW0126791	C8H14O2S2	Thioctic acid	Organic acid And Its derivatives	Organic acid And Its derivatives	MS2-Search-DB	0.7181	1077-28-7	3.99551e+06	3.92263e+06	3.79926e+06	3.80627e+06	3.77463e+06	3.87233e+06	3.64892e+06	3.48928e+06	3.37933e+06	3.77712e+06	3.69604e+06	3.29579e+06	3.49489e+06	3.21874e+06	3.00955e+06	3.00317e+06	3.06053e+06	2.63138e+06	2.64944e+06	2.93034e+06	3.00981e+06	2.77999e+06	2.85382e+06	2.53228e+06	2.67745e+06	2.18083	2.3967e-07	0.797952	-0.325627	insig
MW0133679	C9H6O3	4-Hydroxycoumarin	Aldehyde,Ketones,Esters	Ketones	MS2-Search-DB	0.6587	1076-38-6	293239	146042	166224	153114	143681	124896	157496	127212	132882	197203	155837	140541	143590	132415	119138	133412	116752	114234	121077	125483	123836	136443	154137	108381	146060	1.37712	0.0716004	0.800384	-0.321236	insig
MW0107191	C3H8NO5P	N-(Phosphonomethyl)glycine	Amino acid and Its metabolites	Amino acid and Its metabolites	MS2-Search-Local	0.5048	1071-83-6	69088.3	53105.4	50679.7	39231.3	45644.7	49077.3	53172.3	40551.7	90436.5	51424.4	50354.3	73283.4	46705.7	48801	46050.2	41270.1	53522.6	36162	35739	33886.6	57964.2	62242.1	43708.2	76262	47112.9	0.465834	0.496471	0.925576	-0.111577	insig
MEDP2166	C5H8O4	Ethyl hydrogen malonate	Aldehyde,Ketones,Esters	Esters	MS2-Search-DB	0.6767	1071-46-1	206807	211799	189866	197047	197912	217116	211682	183168	203733	180830	177517	180081	216207	181348	196587	187367	237404	190450	231196	166217	139910	177935	157016	178659	122326	0.956959	0.0648557	0.913425	-0.130641	insig
MW0104668	C2H8NO4P	2-Aminoethyl dihydrogen phosphate	GP	PE	MS2-Search-DB	0.6756	1071-23-4	390344	387434	379501	390379	381793	776133	387682	394764	408616	783329	826782	423190	797800	412333	815449	427148	856481	422525	811264	380222	410588	406951	378323	385242	387338	0.494854	0.324497	1.15978	0.213856	insig
MW0111256	C5H15NO4P	Phosphocholine	Organic acid And Its derivatives	Phosphoric acids	MS2-Search-Local	0.8716	107-73-3	174801	178144	686567	174733	163613	218838	730844	165190	175456	152184	199103	210194	202224	159702	207739	250073	220547	227101	193869	199786	198717	744612	140400	167526	169287	0.256134	0.550223	0.825159	-0.277256	insig
MEDP0039	C5H11NO2	Betaine	Others	Others	MS2-Search-Local	0.9192	107-43-7	4.40307e+06	4.82762e+06	4.23558e+06	2.91691e+06	2.50761e+06	2.69587e+06	3.43107e+06	3.71992e+06	6.0827e+06	6.00044e+06	4.88704e+06	3.15782e+06	2.64925e+06	2.76557e+06	5.14181e+06	4.62336e+06	4.61356e+06	2.72832e+06	6.46584e+06	3.12951e+06	5.8269e+06	4.85012e+06	4.41919e+06	6.9693e+06	5.31614e+06	0.388582	0.442416	1.10309	0.141556	insig
MW0053897	C16H32O	hexadeca-9-en-1-ol	Organic acid And Its derivatives	Organic acid And Its derivatives	MS2-Search-DB	0.7136	10378-01-5	62272.4	80192.9	92640.1	83394.3	75415.8	68083.2	68731.4	83223.8	98048.8	103138	81795.5	109534	55646.7	79833.2	96100.5	90765.2	109249	90007.9	83771.4	94531.1	72874	65992.6	95072.5	104944	109508	0.531716	0.205235	1.09562	0.131747	insig
MW0007511	C3H6O3	D-Lactic Acid	Organic acid And Its derivatives	Organic acid And Its derivatives	MS2-MetDNA	0.9019	10326-41-7	41816.5	26052.8	19382.3	30168.4	31693.3	39670.6	30494.9	71221.9	46247.5	16554.1	18856.3	24727.6	21114.9	42782.3	14067.1	15451.9	18000.2	12100.6	34912.8	95311.2	55889.5	85580	34747.8	58086.6	22103.6	0.0772142	0.851494	1.04487	0.0633232	insig
MW0137667	C11H12O2	Ethyl cinnamate	Organic acid And Its derivatives	Organic acid And Its derivatives	MS2-Search-DB	0.7207	103-36-6	97583.3	88092.9	193534	89751.9	183703	78238.2	193555	77291.1	69378.8	76453	104231	449333	413604	96178.4	388640	159209	67077	66584.1	64984.8	101594	169095	206506	71102.9	188065	76544	0.615688	0.134021	1.52364	0.60752	insig
MW0111342	C9H21N	Tripropylamine	Alcohol and amines	Amines	MS2-Search-DB	0.841	102-69-2	328951	411907	402146	375694	296862	392682	398014	344037	398935	455117	407493	436020	355406	409227	390414	358877	403944	337289	386878	408793	320034	354854	440129	333341	314798	0.141684	0.857152	0.991409	-0.012447	insig
MW0009858	C25H34N4O2S	Tenovin-6	Benzene and substituted derivatives	Benzene and substituted derivatives	MS2-Search-DB	0.7181	1011557-82-6	571522	513696	538163	664832	840906	569116	315205	582149	752890	332474	549641	483750	673840	790935	654962	506969	609385	956752	686430	606896	636272	664862	685926	873509	720428	1.07478	0.105246	1.18531	0.245267	insig
MW0110992	C12H23N	Dicyclohexylamine	Alcohol and amines	Amines	MS2-Search-DB	0.7446	101-83-7	675114	719676	1.10789e+06	549700	507179	710750	717958	546436	528610	589652	618890	542223	665863	628614	489259	504495	547085	480151	543943	507579	698547	532276	842295	530830	532107	0.862219	0.176642	0.8682	-0.2039	insig
MW0115599	C3H4Cl2	1,3-Dichloropropene	Others	Hydrocarbon derivatives	MS2-Insilico	0.598	10061-02-6	698766	540929	1.14978e+06	925794	955703	907135	466700	1.34957e+06	816651	853784	1.12471e+06	305343	1.38672e+06	617651	464802	284404	122246	582175	233109	692676	461638	935385	914883	980498	343320	0.993823	0.0741328	0.727046	-0.459882	insig
MW0147529	C3H4Cl2	cis-1,3-Dichloropropene	Others	Hydrocarbon derivatives	MS2-Insilico	0.5118	10061-01-5	3.61342e+06	3.9724e+06	3.96194e+06	3.45444e+06	4.30071e+06	4.07316e+06	1.73119e+06	3.35591e+06	2.47396e+06	4.09269e+06	3.97684e+06	2.09037e+06	4.08102e+06	2.16258e+06	2.85216e+06	3.52772e+06	2.4781e+06	2.71829e+06	3.84645e+06	2.98872e+06	3.67517e+06	2.34433e+06	2.73329e+06	3.85739e+06	3.74209e+06	0.534773	0.263454	0.895894	-0.1586	insig
MW0124365	C4H5NO2	Hymexazol	Heterocyclic compounds	Heterocyclic compounds	MS2-Search-DB	0.5109	10004-44-1	241260	173472	80417.1	334918	222056	267635	185404	143010	160644	148060	226614	331794	155330	118538	145138	125802	22178.6	199424	92480.1	100103	145693	197479	166814	290604	178434	0.631829	0.348274	0.85048	-0.233651	insig
MW0006140	C7H6O	Benzaldehyde	Benzene and substituted derivatives	Benzene and substituted derivatives	MS2-Search-Local	0.6937	100-52-7	1.29419e+06	1.04871e+06	1.13106e+06	1.13881e+06	2.55653e+06	1.06351e+06	885961	1.49962e+06	752493	1.25866e+06	736764	1.23789e+06	676321	1.18355e+06	1.10571e+06	982259	1.03767e+06	1.0109e+06	1.49657e+06	747383	1.64577e+06	653396	1.0599e+06	539119	1.25352e+06	0.847476	0.201803	0.811152	-0.301956	insig
MW0005284	C6H5NO3	4-Nitrophenol	Benzene and substituted derivatives	Phenolics	MS2-Search-DB	0.6124	100-02-7	1.06974e+07	1.18392e+07	1.08593e+07	1.12746e+07	1.08574e+07	1.16546e+07	1.10451e+07	8.97054e+06	1.06161e+07	1.17081e+07	1.10331e+07	1.09246e+07	1.10913e+07	1.1041e+07	1.07995e+07	9.51506e+06	8.75149e+06	8.53128e+06	1.0241e+07	1.13654e+07	1.14517e+07	1.16399e+07	1.10188e+07	1.18142e+07	1.15319e+07	0.314255	0.530456	0.978493	-0.0313659	insig
MW0063661	C41H83N2O6P	stearoyl sphingomyelin	SL	SM	MS2-MetDNA	0.8302	-	156322	587030	4.85473e+06	573268	324685	387564	171688	26857.3	3505.97	5115.26	6861.79	5659.24	1515.86	9090.96	4114.42	1760.29	303267	263870	11073.4	208351	375361	133728	39303.6	19064.9	6173.2	1.10867	0.219054	0.130611	-2.93665	insig
MW0114085	C3H3ClO	cis-3-Chloroallyl aldehyde	Aldehyde,Ketones,Esters	Aldehydes	MS2-Insilico	0.6572	-	2.12229e+06	2.05429e+06	3.50679e+06	740982	1.11835e+06	2.18474e+06	1.51933e+06	704953	1.71804e+06	2.06533e+06	247506	186189	1.60482e+06	1.15265e+06	289765	1.68999e+06	3.36861e+06	1.761e+06	1.59754e+06	2.64605e+06	2.49765e+06	2.09116e+06	2.09384e+06	1.9764e+06	3.81637e+06	0.167902	0.942154	1.01567	0.0224331	insig
MW0015670	C30H46O2	alpha,gamma-Onoceradienedione	Others	Others	MS2-Insilico	0.6858	-	423424	404026	406803	426451	417017	417637	387513	385147	396849	422757	431475	377132	455766	428525	382394	412597	409249	403810	391540	401648	425059	402921	409601	366634	385175	0.148062	0.682193	0.992186	-0.011317	insig
MW0159130	C25H30N4O4	Val-Phe-Trp	Amino acid and Its metabolites	Small Peptide	MS2-Search-DB	0.6255	-	1.7315e+06	2.15038e+06	2.81496e+06	1.96802e+06	2.30373e+06	2.15738e+06	2.50212e+06	2.19199e+06	2.31887e+06	2.47895e+06	2.39974e+06	2.11188e+06	2.71215e+06	1.57904e+06	2.40212e+06	1.46095e+06	2.76243e+06	1.79684e+06	1.92969e+06	2.21728e+06	2.03452e+06	2.0562e+06	2.06012e+06	2.08761e+06	1.61413e+06	0.740038	0.201953	0.920353	-0.11974	insig
MW0158476	C27H42N12O6	Tyr-His-Arg-Arg	Amino acid and Its metabolites	Small Peptide	MS2-Search-DB	0.7032	-	3.53878e+06	3.23049e+06	3.07342e+06	3.93337e+06	4.44244e+06	4.11895e+06	2.33311e+06	3.75191e+06	4.07235e+06	2.19468e+06	3.4549e+06	3.53616e+06	4.41874e+06	4.73677e+06	4.37769e+06	3.42846e+06	3.10735e+06	5.52588e+06	4.39011e+06	4.11639e+06	4.43097e+06	4.28084e+06	4.22444e+06	5.17169e+06	4.18256e+06	1.38216	0.019059	1.2181	0.284633	insig
MW0158252	C17H22N4O5	Trp-Thr-Gly	Amino acid and Its metabolites	Small Peptide	MS2-Search-DB	0.8179	-	304587	290588	637329	528481	305130	291125	167110	266189	546969	189584	248656	261098	223199	312846	315313	294258	554262	330421	276230	253086	248238	351873	544299	294001	282225	0.209411	0.566036	0.905374	-0.143415	insig
MW0110137	C15H19N3O4	Trp-Thr	Amino acid and Its metabolites	Small Peptide	MS2-Search-DB	0.6433	-	241332	282196	189902	197857	148180	489254	179611	255729	250837	108423	239059	203593	101804	237291	186558	124807	141402	299363	346805	135774	144754	289757	230734	45148.3	100617	0.775248	0.263276	0.804404	-0.314008	insig
MW0158115	C21H28N4O6	Trp-Asp-Ile	Amino acid and Its metabolites	Small Peptide	MS2-Search-DB	0.8772	-	683904	602062	651803	867261	888741	761360	349315	645487	839319	362765	642381	629304	643457	859337	773667	607429	761349	948759	685950	626127	744412	792854	676498	913564	688972	0.767914	0.326151	1.10183	0.139898	insig
MW0110034	C5H12NO2	Trimethylammonioacetate	Aldehyde,Ketones,Esters	Esters	MS2-Insilico	0.7027	-	3.76774e+06	8.07905e+06	2.62747e+06	7.46387e+06	3.21868e+06	7.54787e+06	3.74032e+06	3.83074e+06	1.3727e+07	3.84035e+06	3.43529e+06	4.18982e+06	2.59487e+06	2.52901e+06	4.1738e+06	4.34231e+06	2.56369e+06	1.48777e+07	2.98945e+06	3.14363e+06	2.53592e+06	2.5052e+06	8.0381e+06	3.62196e+06	3.74152e+06	0.831226	0.309626	0.752407	-0.410416	insig
MW0157826	C20H28N4O5S1	Thr-Trp-Met	Amino acid and Its metabolites	Small Peptide	MS2-Search-DB	0.7948	-	360282	375714	490028	386496	485188	509703	408760	385863	398689	410647	496595	614174	549689	399961	396097	374364	454840	361880	349806	466135	421154	417611	433646	347401	318137	0.00626762	0.835115	1.01337	0.019156	insig
MW0157888	C10H16N4O4	Thr-His	Amino acid and Its metabolites	Small Peptide	MS2-Search-Local	0.6322	-	126260	131533	122023	48678.7	130285	56930.2	141039	143307	140539	157071	140989	139855	142328	53567.7	130742	117722	53950.4	46909.6	130451	132277	42554	114816	117346	44628.5	118951	0.664866	0.261729	0.850035	-0.234405	insig
MW0157613	C21H40N6O7	Thr-Gln-Leu-Lys	Amino acid and Its metabolites	Small Peptide	MS2-Search-DB	0.696	-	515956	634649	689653	567798	651445	514542	713449	607919	640912	308593	655656	607067	304860	213453	290655	501329	710084	243025	236895	733512	574731	265809	594642	288092	224986	1.22956	0.0224505	0.735088	-0.44401	insig
MW0009918	C16H22N4O	Thonzylamine	Benzene and substituted derivatives	Phenolics	MS2-Search-Local	0.6242	-	737049	702465	910411	1.03419e+06	807383	733831	517891	675430	964302	570612	733746	665163	684303	808534	849563	651531	1.52415e+06	960718	681073	678780	779185	847932	839212	715866	729755	0.323649	0.566122	1.05829	0.0817323	insig
MW0010222	H2O3S2	Thiosulfate	Others	Metal, Non-metal and related compounds	MS2-Insilico	0.6552	-	3.64007e+07	3.70113e+07	4.64316e+07	3.91153e+07	4.00171e+07	4.26349e+07	3.9349e+07	3.81203e+07	3.6155e+07	5.84943e+07	3.64779e+07	3.94774e+07	3.78938e+07	5.9582e+07	5.98869e+07	3.57229e+07	3.82517e+07	3.88845e+07	4.29997e+07	3.76002e+07	3.7009e+07	1.55585e+07	5.57382e+07	5.64713e+07	6.06183e+07	0.0522925	0.593061	1.05088	0.0716027	insig
MW0100742	C42H80O6	TG(i-21:0/8:0/10:0)	GL	TG	MS2-MetDNA	0.7244	-	573251	491117	41694.3	264219	52400.5	23875.1	20498.5	12607.2	8036.16	26867.5	35323.2	34773.7	74016.4	54950.7	32168.2	84007.7	591796	119400	38555.8	68708.5	61455.3	44186.4	47426.2	61971	34346.3	0.16094	0.454716	0.608793	-0.715977	insig
MW0064008	C42H80O6	TG(10:0/16:0/i-13:0)	GL	TG	MS2-MetDNA	0.77	-	61240.7	772143	6.8518e+06	409991	90044.1	23704.9	174803	132562	59044.6	60313.8	107974	124620	302169	616774	216397	67481.8	2.79408e+06	861751	158536	691984	360962	178768	680020	646980	376211	0.750357	0.655305	0.631854	-0.662336	insig
MW0064002	C42H80O6	TG(10:0/16:0/a-13:0)[rac]	GL	TG	MS2-MetDNA	0.8245	-	1.63568e+06	575009	25267.3	87997.3	78139.9	26764.2	32073.6	34382.8	35810.9	101280	67174.2	151292	302294	255870	116101	51110.9	2.36349e+06	297097	157404	208532	182365	127798	147553	223328	106729	0.921912	0.807367	1.20502	0.269054	insig
MW0063991	C42H80O6	TG(10:0/16:0/13:0)	GL	TG	MS2-MetDNA	0.5866	-	62438.9	6220.31	51865.2	7645.42	4200.69	3144.97	8593.15	4529.44	4859.64	6947.99	7167.61	10728	10305.8	5799.38	13156.5	103147	118781	14208.6	6341.91	12956.3	8533.11	3971.06	4572.03	7257.42	5287.02	0.31224	0.605509	1.38037	0.465059	insig
MW0109696	C18H28N6O6	Ser-Tyr-Arg	Amino acid and Its metabolites	Small Peptide	MS2-Search-DB	0.8525	-	117928	94445.7	61664.2	68850.9	80261.6	73058.5	82505.6	101498	95266.3	116164	213265	212982	257804	141588	132083	151000	137722	124898	113750	114848	186117	111384	121877	126201	115815	1.96255	0.000139202	1.69076	0.757672	insig
MW0063483	C45H75NO11	Scytophycin C	Heterocyclic compounds	Heterocyclic compounds	MS2-Search-DB	0.7301	-	1.7904e+06	1.50022e+06	1.088e+06	1.64616e+06	1.84378e+06	1.87015e+06	957479	1.71369e+06	1.7817e+06	748540	1.3677e+06	1.40459e+06	1.52672e+06	2.25876e+06	2.25115e+06	1.50946e+06	2.9169e+06	2.69615e+06	1.86967e+06	1.87323e+06	1.86905e+06	2.0874e+06	2.13366e+06	2.89462e+06	1.80558e+06	1.41027	0.0079621	1.35941	0.442981	insig
MW0063555	C39H80N2O6P	SM(d18:1/16:0)	SL	SM	MS2-Search-DB	0.9295	-	2.51701e+06	26473.2	14271.9	35641.9	19566	9860.89	7246.86	1845.09	1198.26	6722.6	11402.9	9871.48	30731	71082.9	81728.6	220565	113938	117667	73201.4	33528.7	11196.1	17736	22188.3	28691.2	44250.6	0.812089	0.435102	0.224201	-2.15714	insig
MW0109436	C9H16N2O4	Pro-Thr	Amino acid and Its metabolites	Small Peptide	MS2-Search-Local	0.6291	-	145906	149277	167919	48372.7	154332	168216	235450	134301	7015.58	71993.5	361892	8517.75	88619.1	1.0273e+06	114814	63964.6	146531	123830	69551.6	537597	415416	50036.5	405805	143908	210685	0.597863	0.107266	1.95849	0.969738	insig
MEDL00444	C11H20N2O3	Pro-Ile	Amino acid and Its metabolites	Small Peptide	MS2-Search-DB	0.8364	-	834657	1.13611e+06	993158	1.3584e+06	803518	901135	616611	999005	708856	658154	769198	814327	1.10474e+06	886041	1.3106e+06	546280	874907	887268	1.33566e+06	1.08101e+06	869153	1.20321e+06	1.17273e+06	753949	1.13747e+06	0.494868	0.389614	1.09117	0.125878	insig
MW0168263	H3O3P	Phosphite	Others	Metal, Non-metal and related compounds	MS2-Insilico	0.6496	-	97019.3	97786.8	109924	94152.2	166189	103009	135790	117546	225377	99665.4	108687	108744	91990.8	102359	96248.6	122262	95993.1	99203.7	79225.5	97870.4	103227	109537	95824.2	95901.9	88299.1	1.18092	0.0950795	0.799798	-0.322292	insig
MW0115115	C20H30O10	Phenethyl rutinoside	Benzene and substituted derivatives	Benzene and substituted derivatives	MS2-Search-DB	0.8268	-	209757	278325	290578	223224	260038	199855	312145	241873	295641	298534	313842	232477	359312	205437	332239	235118	373398	244596	248310	318110	218562	270957	249167	342753	213270	0.392724	0.414378	1.06197	0.0867368	insig
MW0155416	C25H30N4O4	Phe-Val-Trp	Amino acid and Its metabolites	Small Peptide	MS2-Search-DB	0.6448	-	7.04886e+06	9.85585e+06	1.05664e+07	7.21607e+06	8.43808e+06	6.57935e+06	1.08033e+07	8.12368e+06	1.01658e+07	1.01227e+07	1.03056e+07	7.81941e+06	1.04567e+07	6.68702e+06	1.10237e+07	6.33556e+06	1.19781e+07	7.37013e+06	8.19608e+06	1.01392e+07	6.78233e+06	8.72028e+06	7.36271e+06	1.00809e+07	6.5169e+06	0.247304	0.733277	0.972967	-0.0395367	insig
MW0155388	C30H44N8O6	Phe-Tyr-Lys-Arg	Amino acid and Its metabolites	Small Peptide	MS2-Search-DB	0.8715	-	3.84608e+06	3.37245e+06	2.65255e+06	3.5519e+06	4.08556e+06	4.06892e+06	2.33409e+06	3.44928e+06	3.55598e+06	1.96139e+06	3.27297e+06	3.34692e+06	3.32772e+06	4.51284e+06	4.71642e+06	3.47225e+06	7.5664e+06	4.91398e+06	3.72578e+06	3.57247e+06	4.01425e+06	4.26399e+06	4.04013e+06	4.94067e+06	3.76892e+06	1.33351	0.0161886	1.28668	0.363656	insig
MW0155346	C23H36N6O7	Phe-Thr-Asn-Lys	Amino acid and Its metabolites	Small Peptide	MS2-Search-DB	0.6922	-	151472	130908	153601	143117	186048	110482	278152	230911	146334	174803	353668	120401	355458	227683	183443	226666	255616	333056	266413	333021	144391	166269	287702	234694	273973	1.44466	0.00391139	1.47043	0.556239	insig
MW0155441	C13H16N2O5	Phe-Asp-OH	Amino acid and Its metabolites	Small Peptide	MS2-MetDNA	0.9241	-	11077.4	11360	8037.92	13108.2	10904	10740.3	10709	10071.6	9419.6	8111.47	11038.3	8931.67	7431.66	10312.6	8801.31	10048.1	9051.66	8784.08	8763.59	8167.73	9108.57	9560.47	8053.91	6237.01	9271.8	1.32739	0.0217822	0.859979	-0.217627	insig
MW0139259	C47H68O15	Pectenotoxin 3	GP	PE	MS2-Insilico	0.6683	-	1.19873e+06	1.0978e+06	863745	1.34636e+06	1.28372e+06	1.28211e+06	694022	1.0706e+06	1.29895e+06	518458	1.19655e+06	1.13855e+06	1.28496e+06	1.50266e+06	1.35206e+06	1.17075e+06	1.21722e+06	1.71165e+06	1.25467e+06	1.09562e+06	1.51076e+06	1.48834e+06	1.29487e+06	1.40397e+06	1.24643e+06	1.39729	0.0218473	1.24324	0.314099	insig
MW0169628	C23H45NO4	Palmitoyl-L-Carnitine	FA	CAR	MS2-Search-DB	0.7194	-	104880	90054.7	36803.2	58430.3	52830.5	69285.4	82927.8	67588.4	57616.1	91067.9	82689.4	65172.8	52750.2	121465	70274.4	91194.7	69191.1	126309	70870.1	132653	117634	66052.9	97741.3	114186	74053.4	1.09297	0.0565278	1.26706	0.341481	insig
MW0061107	C38H71O10P	PG(16:1(9Z)/16:1(9Z))	GP	PG	MS2-MetDNA	0.5886	-	84368.8	42327.1	67946.5	77469.3	87373.6	27948.3	63260.8	92560.4	122532	74683.5	92569.1	77822.3	125908	135369	124252	67419.8	77294.2	167976	95179.5	78389.4	66926.2	135717	146098	91880.9	144583	1.36539	0.00849543	1.46518	0.551079	insig
MW0060771	C47H90NO8P	PE-NMe2(22:1(13Z)/18:1(11Z))	GP	PE	MS2-MetDNA	0.6003	-	2400.05	1126.73	815.858	1883.83	1428.68	833.843	1571.91	618.586	3427.65	573.21	1331.67	160.896	212.958	2144.44	1468.26	577.575	794.97	2207.74	2411.23	546.665	335.529	1509.37	2162.23	682.568	4080.9	0.487829	0.818377	0.936717	-0.0943149	insig
MW0060767	C44H86NO8P	PE-NMe2(22:1(13Z)/15:0)	GP	PE	MS2-MetDNA	0.8854	-	425432	627768	224901	52665.7	104675	550024	304786	469069	141976	146878	273203	94846.1	64454.9	24004.7	17457.8	9801.33	1345.68	11359.8	249594	108463	19221.1	21407.8	43641.4	47232.9	272290	1.68517	0.00754538	0.275208	-1.86141	down
MW0060666	C47H78NO8P	PE-NMe2(20:4(5Z,8Z,11Z,14Z)/20:4(5Z,8Z,11Z,14Z))	GP	PE	MS2-MetDNA	0.7087	-	334.298	75171.1	106331	77375.5	53518.6	56067	29623	12208	9686.51	8676.06	9348.79	8612.94	8535.78	12830.3	14465.7	12697.1	12102.6	11633.9	12200.4	58854.7	50314	22982.9	19280.3	14441.4	12980.7	0.302112	0.0704698	0.437121	-1.19389	insig
MW0060530	C49H86NO8P	PE-NMe2(20:0/22:6(4Z,7Z,10Z,13Z,16Z,19Z))	GP	PE	MS2-MetDNA	0.5713	-	6693.5	1454.08	3050.94	452.169	5571.43	6480.96	6078.42	6443.76	1917.61	9443.28	4706.2	2925.5	1410.66	4275.45	4883.12	2942.84	3790.97	1842.28	3286.47	728.444	377.291	796.422	3653.68	3773.78	4040.99	0.798881	0.0831718	0.608498	-0.716676	insig
MW0060398	C43H76NO8P	PE-NMe2(18:2(9Z,12Z)/18:3(9Z,12Z,15Z))	GP	PE	MS2-MetDNA	0.5548	-	190621	270968	131580	171442	172776	103935	130368	173354	208236	145683	381717	259036	478082	528606	213845	262586	262326	311887	202048	315602	239622	545940	268538	131955	289217	1.80725	0.000532347	1.84073	0.88028	insig
MW0060356	C47H80NO8P	PE-NMe2(18:1(11Z)/22:6(4Z,7Z,10Z,13Z,16Z,19Z))	GP	PE	MS2-MetDNA	0.837	-	39614.6	42211.7	24123.3	10488.1	27059.3	8758.37	6396.08	4840.57	2282.91	1746.75	1681.57	4566.62	3750.81	4926.98	5387.1	5265.31	7331.6	31864.1	6857.84	20454.6	8089.08	7337.41	6615.87	5351.75	5202.08	0.680046	0.133426	0.496185	-1.01105	insig
MW0060352	C47H88NO8P	PE-NMe2(18:1(11Z)/22:2(13Z,16Z))	GP	PE	MS2-MetDNA	0.7017	-	98278.9	62577.7	79833.6	87448.6	106877	28734.1	64207.5	116277	160137	90615.1	110037	81660.7	106444	198261	118683	69960.8	89667.7	191947	118409	122714	57682.1	160595	228654	59490.1	214054	0.971442	0.045326	1.43634	0.5224	insig
MW0060349	C45H78NO8P	PE-NMe2(18:1(11Z)/20:5(5Z,8Z,11Z,14Z,17Z))	GP	PE	MS2-MetDNA	0.8551	-	1584.18	11302.2	7738.93	7538.82	18298.1	26339.4	22416	13549.6	3510.65	4460.57	1515.89	6346.81	1330.85	2510.6	3140.27	721.644	1252.49	503.418	5870.28	12590.7	11987.5	6014.53	2273.19	5627.08	9423.71	1.25349	0.031555	0.406087	-1.30014	down
MW0060325	C47H84NO8P	PE-NMe2(18:0/22:5(4Z,7Z,10Z,13Z,16Z))	GP	PE	MS2-MetDNA	0.9202	-	14565.4	18110.3	14716.6	6654.32	13837.7	6778.18	1155.47	995.799	814.083	573.052	203.517	528.369	910.673	1094.12	1794.04	4052.87	3693.51	10870.9	2887.51	7468.64	3955.19	5377.61	3744.05	2217.7	2765.39	0.590935	0.083682	0.439587	-1.18578	insig
MW0060266	C45H82NO8P	PE-NMe2(16:0/22:4(7Z,10Z,13Z,16Z))	GP	PE	MS2-MetDNA	0.7829	-	63988	62010.3	56515.6	48318.9	49544.5	35151.9	12418.8	42214.5	36033	81440.3	87658.7	103703	91069.3	62928.8	85695.1	45804.9	40961.2	21351.1	5611.3	14649.4	12730.4	6350.1	6658.77	3129.4	6294.42	0.942923	0.428117	0.812896	-0.298857	insig
MW0060238	C44H78NO8P	PE-NMe2(15:0/22:5(4Z,7Z,10Z,13Z,16Z))	GP	PE	MS2-MetDNA	0.9031	-	7731.59	894.247	677.413	1025.45	2669.4	4579.92	5285.38	6250.47	8126.17	5063.97	6271.36	3920.43	3815.67	1252.48	542.204	1686.05	2583.04	2556.15	2891.84	1082.72	3887.07	1397.73	1267.44	1551.24	2422.82	0.739389	0.0923741	0.585102	-0.77324	insig
MW0060237	C44H80NO8P	PE-NMe2(15:0/22:4(7Z,10Z,13Z,16Z))	GP	PE	MS2-MetDNA	0.9137	-	7885.17	19202.6	18567	19263	12511.8	10783	9270.61	7869.77	9896.08	13926.8	10561.4	12955.2	14745.8	15617.7	14478.2	6216.71	10668.6	8885.7	10990.6	29737.2	30769.6	17583.2	12914.7	9937.14	8325.67	0.332217	0.563974	1.10644	0.145923	insig
MW0060228	C42H80NO8P	PE-NMe2(15:0/20:2(11Z,14Z))	GP	PE	MS2-MetDNA	0.8709	-	2.07781e+06	336866	1.91098e+06	2.22564e+06	1.79604e+06	1.1442e+06	950799	571434	252408	98773.9	138562	83592.7	153837	419610	403463	201835	374973	664075	523581	202347	1.8461e+06	1.3207e+06	395198	362052	1.10614e+06	0.928323	0.0603108	0.480781	-1.05655	insig
MW0060213	C45H86NO8P	PE-NMe2(14:1(9Z)/24:1(15Z))	GP	PE	MS2-MetDNA	0.5074	-	12123.5	3322.02	9720.35	10506.6	13609.4	932.494	7623.55	11108.4	20160.3	7848.3	9661.85	4013.71	13876.9	17723.4	9059.73	6273.7	6687.11	24475.2	11315.4	10640.4	2735.63	17389.6	23872.9	3782.03	24435.8	0.469131	0.308504	1.27856	0.354516	insig
MW0059618	C44H84NO8P	PE-NMe(20:1(11Z)/18:1(9Z))	GP	PE	MS2-MetDNA	0.905	-	153497	658539	140209	28376.2	627817	228716	290347	465841	423885	353054	272949	244797	260465	131709	87311.1	13756.5	48176.5	129819	74068.4	319374	327341	191757	196817	159419	78676.9	0.951737	0.0360941	0.501726	-0.995027	insig
MW0059617	C44H84NO8P	PE-NMe(20:1(11Z)/18:1(11Z))	GP	PE	MS2-MetDNA	0.7505	-	1.18e+06	210974	155778	151654	119540	157892	814645	2.20727e+06	806510	726011	518829	636293	339945	75083.4	112931	62144.5	49033.4	42261.7	70068.3	67788.6	83477.2	71354.2	29970.1	199580	236062	1.58059	0.0501909	0.264901	-1.91647	insig
MW0059602	C48H96NO8P	PE-NMe(20:0/22:0)	GP	PE	MS2-MetDNA	0.5584	-	100603	53225.6	73203.7	79207.9	92251.5	29302.5	63413.9	92777.8	129351	81239.9	96806.2	68512.7	110557	140096	97935.9	62824.8	64152.5	160255	105803	96554.5	59324.6	133781	163052	56368.9	157361	0.909411	0.0662101	1.3201	0.40065	insig
MW0059591	C44H82NO8P	PE-NMe(20:0/18:3(6Z,9Z,12Z))	GP	PE	MS2-MetDNA	0.6263	-	1.74504e+06	496464	830084	2.77006e+06	1.26318e+06	1.20083e+06	2.88551e+06	3.02265e+06	2.06459e+06	1.3519e+06	1.32769e+06	265853	390526	588053	442945	417498	320219	824625	1.80136e+06	2.45052e+06	745687	1.37787e+06	3.63437e+06	431806	2.51297e+06	1.03855	0.13752	0.662949	-0.59303	insig
MW0059590	C44H84NO8P	PE-NMe(20:0/18:2(9Z,12Z))	GP	PE	MS2-MetDNA	0.9628	-	372344	906588	107935	59651.6	283527	1.14146e+06	771184	255156	872414	197363	837571	726453	159975	458692	388946	255651	113618	60666.9	69960.5	690133	500622	345417	477194	153704	80904.9	0.418462	0.32454	0.713891	-0.486224	insig
MW0059585	C42H84NO8P	PE-NMe(20:0/16:0)	GP	PE	MS2-MetDNA	0.9687	-	1.60447e+06	1.45794e+06	2.85556e+06	8.85295e+06	2.13696e+06	3.07997e+06	3.65038e+06	1.02659e+06	833927	212930	155490	164007	187325	250841	1.02654e+06	1.07914e+06	274593	1.18327e+06	1.41911e+06	2.9242e+06	2.44134e+06	3.54809e+06	4.12828e+06	3.19638e+06	504365	0.747674	0.232055	0.582951	-0.778554	insig
MW0059479	C44H82NO8P	PE-NMe(18:2(9Z,12Z)/20:1(11Z))	GP	PE	MS2-MetDNA	0.9727	-	91680.2	575551	14849.6	109698	251048	96833.3	54915.9	14466.1	1244.03	4812.1	3148.07	10098.7	34068	20439.2	28135.6	32644.7	4891.7	50565.2	54063.8	86438.3	97895.5	43754.7	43658.9	60929	52030.1	0.208002	0.187452	0.341679	-1.54929	insig
MW0059478	C44H84NO8P	PE-NMe(18:2(9Z,12Z)/20:0)	GP	PE	MS2-MetDNA	0.8992	-	24127	49482.4	90604.7	68345.2	193871	62807.5	72969.4	132001	115159	116912	81523.4	50635.4	72109.7	35879.5	29935.9	25162.2	22952.6	19982.3	66791.4	31353.9	65547.7	57570.1	54144.9	41809	40135.1	1.47272	0.0156616	0.500593	-0.998291	insig
MW0059450	C44H84NO8P	PE-NMe(18:1(9Z)/20:1(11Z))	GP	PE	MS2-MetDNA	0.8508	-	479117	440586	235431	408504	8692.07	225110	299566	336646	874986	670961	365154	427635	482580	164770	136369	135937	11530.1	13760	23296.8	1914.62	222654	205207	147620	151102	7145.11	1.06858	0.0183329	0.418246	-1.25758	down
MW0059443	C42H80NO8P	PE-NMe(18:1(9Z)/18:1(11Z))	GP	PE	MS2-MetDNA	0.8058	-	43945.9	1.60396e+06	866431	1.71518e+06	683247	1.65268e+06	792816	209678	48039.8	29125.3	187939	193285	117453	250595	467999	323459	705917	283628	334329	1.9854e+06	2.00305e+06	829867	436113	454052	156951	0.225452	0.505942	0.761275	-0.39351	insig
MW0059430	C46H86NO8P	PE-NMe(18:1(11Z)/22:2(13Z,16Z))	GP	PE	MS2-MetDNA	0.8016	-	71647	60104.4	74089.1	97050.1	236618	313390	99470.4	179830	184801	136249	130665	154150	75122.8	54435.9	80350.1	67407.5	50267.1	35177.7	46404.8	31595.4	34517.4	30128.7	106490	101719	60750.2	1.60739	0.0208173	0.485891	-1.04129	down
MW0059421	C44H84NO8P	PE-NMe(18:1(11Z)/20:1(11Z))	GP	PE	MS2-MetDNA	0.9415	-	535986	462734	495308	1.00234e+06	289613	344512	322120	773411	487492	297333	692144	468491	368747	278931	137525	58479.9	38929.2	23379.1	106322	21298	77014.9	219520	6148.92	187265	92275.1	1.67299	0.00224207	0.369394	-1.43677	down
MW0059415	C42H80NO8P	PE-NMe(18:1(11Z)/18:1(9Z))	GP	PE	MS2-MetDNA	0.8524	-	27921.2	29932	2.06426e+06	3.12521e+06	2.1834e+06	1.45717e+06	1.39806e+06	591490	267939	954347	127139	126016	111360	206398	246716	231664	205400	191550	223239	259594	1.40347e+06	1.33225e+06	556276	345422	267038	0.714989	0.0357135	0.321414	-1.6375	insig
MW0059414	C42H80NO8P	PE-NMe(18:1(11Z)/18:1(11Z))	GP	PE	MS2-MetDNA	0.9195	-	244132	1.93016e+06	4.23192e+07	8.86115e+07	4.41619e+07	8.18874e+07	1.75727e+07	2.75504e+06	5.69523e+06	4.97762e+06	3.70374e+06	899589	1.19246e+06	3.37415e+06	2.16665e+06	3.80304e+06	3.24783e+06	5.40455e+06	5.56428e+06	3.83333e+06	1.90414e+07	2.66695e+07	1.37028e+07	8.82326e+06	2.20085e+06	0.699486	0.0700461	0.238097	-2.07038	insig
MW0059403	C46H82NO8P	PE-NMe(18:0/22:5(4Z,7Z,10Z,13Z,16Z))	GP	PE	MS2-MetDNA	0.8527	-	556141	512898	337887	140286	307943	254748	915536	578550	784622	469403	806007	514831	524926	75155.4	842848	16595	28721.7	180803	333429	172576	129610	46474.4	60307.8	23711.4	25389.3	1.42522	0.0381235	0.518921	-0.946414	insig
MW0059394	C44H82NO8P	PE-NMe(18:0/20:3(5Z,8Z,11Z))	GP	PE	MS2-MetDNA	0.9215	-	605214	5.8713e+06	1.83616e+06	886195	3.46732e+06	833397	333997	304081	216465	148074	45771.2	118837	171427	176540	95576	87184.3	126562	381568	554174	4.39857e+06	212635	239867	488110	425521	405993	1.17843	0.179307	0.364465	-1.45615	insig
MW0059393	C44H84NO8P	PE-NMe(18:0/20:2(11Z,14Z))	GP	PE	MS2-MetDNA	0.9885	-	697365	509301	476970	372143	284140	491739	1.57567e+06	3.26117e+06	4.20509e+06	3.97911e+06	828277	3.23981e+06	2.75406e+06	1.47994e+06	917730	620884	287435	409309	315896	31403.5	92829.6	446670	560005	285797	145495	0.916376	0.200329	0.522121	-0.937544	insig
MW0059372	C44H82NO8P	PE-NMe(16:1(9Z)/22:2(13Z,16Z))	GP	PE	MS2-MetDNA	0.99	-	135346	526168	999265	327355	304736	160650	48788.6	42225	27021.6	31861.1	6976.89	28125.4	32086.2	54407.7	151482	34416.2	297404	70239.7	277356	24758.1	68342.6	252544	329592	110843	57680.2	0.70089	0.19361	0.459974	-1.12038	insig
MW0059363	C42H80NO8P	PE-NMe(16:1(9Z)/20:1(11Z))	GP	PE	MS2-MetDNA	0.878	-	6290.42	34973.7	46497.7	31663.2	21978.2	25233.9	12501.3	5712.6	5823.37	5821.36	4987.1	4365.45	4496.5	4337.01	4920.9	1006.4	5408.35	5527.14	5099.54	21397.3	20001.9	8790.23	4988.83	5202.47	4519.92	1.44347	0.0252622	0.356408	-1.4884	down
MW0059343	C44H84NO8P	PE-NMe(16:0/22:2(13Z,16Z))	GP	PE	MS2-MetDNA	0.9758	-	13945.7	10106.4	10519.8	8455.39	6169.32	8305.69	16534.7	17767	18245.1	13541.2	15516.9	10868.4	8981.99	3861.88	3085.1	2860.47	1893.6	1582.96	4970.02	2555.45	2643.98	2861.72	3158.58	2753.92	2773.16	2.03174	0.000246026	0.379577	-1.39753	down
MW0059333	C42H84NO8P	PE-NMe(16:0/20:0)	GP	PE	MS2-MetDNA	0.9773	-	74224.4	2.16086e+06	3.96028e+06	6.47445e+06	7.47928e+06	820805	780643	691859	215577	131862	97033.9	146697	243015	918036	917664	215491	227798	220865	259257	403579	715641	4.55969e+06	3.5397e+06	2.17589e+06	314153	0.53706	0.196884	0.437461	-1.19277	insig
MW0059315	C43H78NO8P	PE-NMe(15:0/22:4(7Z,10Z,13Z,16Z))	GP	PE	MS2-MetDNA	0.6859	-	12154	18934	15386.5	7389.76	14422.1	4225.27	5187.4	1707.89	1739.84	2508.48	804.024	1207.78	4899.6	1999.87	1552.53	4810.29	2108.82	6895.85	2335.31	7440.59	5462.65	4286.68	5941.02	3552.95	2095.43	1.01702	0.0477673	0.441442	-1.1797	down
MW0059297	C39H78NO8P	PE-NMe(15:0/18:0)	GP	PE	MS2-MetDNA	0.6249	-	212510	2.3656e+06	275149	169347	321549	552804	69602.8	39629.6	36941.6	78866.6	232672	45020.1	46508	348853	65823	59712.4	312511	102643	85036.7	295522	110813	89569.7	443105	75563.5	81196.9	0.556384	0.290213	0.387279	-1.36855	insig
MW0059291	C44H84NO8P	PE-NMe(14:1(9Z)/24:1(15Z))	GP	PE	MS2-MetDNA	0.7687	-	257693	190174	231183	394131	298024	183281	116492	376900	380973	275368	686251	663510	233491	135369	82487.5	34469.3	27441.1	10990.7	15208.7	10740.2	3147.26	133748	143458	5952.57	3868.48	1.56341	0.0713091	0.53993	-0.889156	insig
MW0059284	C42H80NO8P	PE-NMe(14:1(9Z)/22:1(13Z))	GP	PE	MS2-MetDNA	0.9303	-	465904	471436	308057	6.1595e+06	3.93844e+06	1.21864e+06	1.7267e+06	1.01449e+06	397024	294642	118662	54987.6	526253	314329	390711	226553	357868	187776	218102	327840	1.21023e+06	2.04502e+06	1.02645e+06	739515	564987	1.01594	0.128744	0.346332	-1.52977	insig
MW0059262	C44H86NO8P	PE-NMe(14:0/24:1(15Z))	GP	PE	MS2-MetDNA	0.9497	-	645125	817653	134078	513043	1.40824e+06	1.42657e+06	1.15543e+06	282690	702517	243199	209019	993528	245089	117958	335310	438890	102245	175906	475690	231388	217430	193334	434109	83271.8	1.24291e+06	1.28457	0.0493805	0.49997	-1.00009	down
MW0059256	C42H80NO8P	PE-NMe(14:0/22:2(13Z,16Z))	GP	PE	MS2-Insilico	0.6427	-	43671.6	31721.2	48524.9	47670.4	57424.7	16065.1	31987.2	54991.3	92457.9	47738.8	55117.8	41513.5	53299.2	97974	65887.9	36830.8	43452.8	91931.9	56201.9	64686.7	33511.7	75862.3	118968	44719	110700	1.0318	0.0601638	1.39848	0.483862	insig
MW0059254	C42H84NO8P	PE-NMe(14:0/22:0)	GP	PE	MS2-MetDNA	0.9778	-	1.06853e+06	2.80925e+06	2.4786e+06	5.53726e+06	1.41679e+07	1.02057e+07	2.99112e+06	4.24128e+06	2.31835e+06	1.08452e+06	31321.1	88267.8	58780.9	871662	97306.6	252402	1.20737e+06	1.73005e+06	341310	1.63167e+06	263815	2.75356e+06	2.76236e+06	2.08377e+06	1.51764e+06	1.60162	0.024982	0.223034	-2.16467	down
MW0058713	C42H82NO8P	PE(22:1(13Z)/15:0)	GP	PE	MS2-MetDNA	0.9796	-	259228	1.78174e+06	1.99816e+06	3.69111e+06	467970	3.34467e+06	1.26951e+06	1.15735e+06	863059	891574	796844	842482	760101	1.27028e+06	1.02084e+06	838871	257858	1.75072e+06	1.45859e+06	1.02775e+06	2.32809e+06	373351	334703	131519	298033	0.820108	0.115996	0.571937	-0.806071	insig
MW0058275	C47H92NO8P	PE(18:1(9Z)/24:0)	GP	PE	MS2-MetDNA	0.7022	-	19327.1	9796.75	12230.1	15468.7	17524.2	4769.17	13000.7	43309.7	23873.4	15697.4	18754.4	13235.2	53574.9	26699.7	18994.9	13694.5	34061.1	35686.6	23005	19111.4	12637.3	25276.6	28282.6	12065.2	30171.8	1.02859	0.134219	1.39146	0.476595	insig
MW0058103	C42H80NO8P	PE(15:0/22:2(13Z,16Z))	GP	PE	MS2-MetDNA	0.8292	-	7818.83	4149.07	2.77343e+06	5.61224e+06	3.4285e+06	2.79661e+06	1.98527e+06	466851	355548	156866	140992	157013	119820	265897	373494	451893	307018	292265	329504	407731	1.29516e+06	1.82074e+06	756001	545979	441410	0.0502572	0.0691292	0.292064	-1.77564	insig
MEDP1165	C26H56NO6P	PC(O-16:0/O-2:0)	GP	LPC	MS2-Search-Local	0.8956	-	40204.2	40134.3	37451.9	24201.2	28750.4	48499.3	50725.9	32708.7	78925.4	54647.4	33162.9	51194.5	38061.2	43071.9	99573	69328	44707.6	49174.4	50468.8	35474	41790.3	46996.3	34999.4	36651.9	73577.7	0.547111	0.36912	1.14343	0.193372	insig
MEDP1221	C25H54NO6P	PC(O-16:0/O-1:0)	GP	LPC	MS2-Search-Local	0.664	-	152259	136536	122567	145066	140302	151875	127757	134588	131680	133433	142681	134690	138206	153895	118663	144204	129032	142687	148279	128033	159387	134911	147216	120436	142020	0.189746	0.7569	1.00981	0.0140815	insig
MW0057313	C43H80NO8P	PC(20:3(8Z,11Z,14Z)/15:0)	GP	PC	MS2-MetDNA	0.5741	-	419733	201130	276546	349511	387723	141187	335013	401637	488228	266092	366889	197914	444421	590480	413170	237346	213397	813329	460332	322262	188738	662814	710232	225525	773078	0.65745	0.0962441	1.35095	0.433974	insig
MW0057245	C42H80NO8P	PC(20:2(11Z,14Z)/14:0)	GP	PC	MS2-MetDNA	0.7763	-	77069.5	90674.5	546640	937811	559920	162854	131516	50624.1	19137.2	7402.53	7534.5	13830.2	10106.6	18505	26586.6	22473	32565.9	67803	31088	34900.3	128265	127656	59292.2	58247.6	60067.2	1.2327	0.0619643	0.180345	-2.47117	insig
MW0057213	C42H80NO8P	PC(20:1(11Z)/14:1(9Z))	GP	PC	MS2-MetDNA	0.9162	-	5918.51	992.843	1.29488e+06	2.21217e+06	1.572e+06	913744	1.29941e+06	386113	227273	71548.9	63165.3	99420.7	58567.9	121871	177047	193698	126272	123150	128167	213195	1.93341e+06	790611	343909	246234	180768	0.0258507	0.103844	0.400756	-1.3192	insig
MW0057212	C42H82NO8P	PC(20:1(11Z)/14:0)	GP	PC	MS2-MetDNA	0.9808	-	32750.9	180493	121370	822669	72794	32639.8	10074.3	5030.35	2226.13	4882.34	23849.9	11116.5	13042.6	14189.8	21093.9	24138.4	30651.6	38582	21261.2	484773	66393	35209.6	30398.4	52811.6	49191.8	0.0962401	0.443808	0.475618	-1.07212	insig
MW0057180	C42H82NO8P	PC(20:0/14:1(9Z))	GP	PC	MS2-MetDNA	0.9866	-	28991.9	299833	412477	291626	119095	250982	147152	90684.4	6742.79	9275.99	5402.22	16144.4	8028.98	17540.7	25512.4	20916.5	35214.3	11410.2	29614.1	340699	163491	82205.5	20190.4	57798.4	7789.91	1.05743	0.0464935	0.338777	-1.56159	down
MW0057179	C42H84NO8P	PC(20:0/14:0)	GP	PC	MS2-MetDNA	0.9379	-	1150.01	139914	337683	788208	179583	207319	437992	367266	205499	108930	61210.5	51506.3	50435.6	73597.3	70115.1	68791.2	85951.4	76922.3	111043	180930	220186	299791	382901	253147	149139	0.237843	0.0977147	0.513342	-0.962007	insig
MW0057168	C48H84NO8P	PC(18:4(6Z,9Z,12Z,15Z)/22:2(13Z,16Z))	GP	PC	MS2-MetDNA	0.8146	-	134358	388917	15015	348565	474844	1.22663e+06	1.8545e+06	388545	333579	278237	162620	221329	55753.2	44182.1	24842.7	29656.7	40672.7	30745.9	17675.3	29961.2	42314.1	31434.2	205359	2.1422e+06	224074	1.43512	0.166716	0.40452	-1.30572	insig
MW0057125	C46H86NO8P	PC(18:3(9Z,12Z,15Z)/20:0)	GP	PC	MS2-MetDNA	0.647	-	44250.8	55553.2	25277	62829.5	96455.1	155600	115919	104333	114464	52378.2	109369	112904	69720.3	33020.6	28105.2	40751.8	43587.1	13801.8	25462.1	20107.7	26561.6	26118.9	96147.4	82713	38181.4	1.1995	0.0582108	0.617893	-0.694571	insig
MW0057120	C44H80NO8P	PC(18:3(9Z,12Z,15Z)/18:1(9Z))	GP	PC	MS2-MetDNA	0.9093	-	348843	2.43614e+06	6.87919e+06	5.29337e+06	860519	6.35008e+06	649024	1.79333e+06	298673	261200	215024	232853	646373	31824	543197	228228	279420	1.21127e+06	1.49745e+06	1.60055e+07	3.7044e+06	1.10856e+06	2.04176e+06	461664	384239	0.620477	0.650792	0.757287	-0.401088	insig
MW0057106	C48H78NO8P	PC(18:3(6Z,9Z,12Z)/22:6(4Z,7Z,10Z,13Z,16Z,19Z))	GP	PC	MS2-MetDNA	0.9614	-	17722.9	10507.2	11834.5	16131.7	15263.1	4286.53	12772.3	15392.4	14731.3	9238.36	12774.5	3124.34	15392.2	15614.2	9973.44	8413.63	6455.46	25205	16084.2	9700.85	8622.4	22418.2	16681.2	6686.61	18839.4	0.0771349	0.893398	1.02171	0.030992	insig
MW0057086	C44H80NO8P	PC(18:3(6Z,9Z,12Z)/18:1(11Z))	GP	PC	MS2-MetDNA	0.8301	-	163705	902531	1.28885e+06	1.29564e+06	2.63403e+06	951115	524907	433372	396281	412830	570607	139452	279428	343836	369675	285772	262535	761043	392296	1.61419e+06	995019	400240	629129	657785	420100	0.729478	0.173004	0.601345	-0.733735	insig
MW0057060	C46H86NO8P	PC(18:2(9Z,12Z)/20:1(11Z))	GP	PC	MS2-MetDNA	0.6718	-	304899	215777	68181.2	281357	393347	100697	375242	475737	147872	486747	558158	355264	293386	112908	87319.5	311409	245367	90921.2	270844	56542.4	49462.9	62671.6	84760.7	50709.8	107949	1.09111	0.109844	0.640424	-0.642901	insig
MW0057020	C44H84NO8P	PC(18:1(9Z)/18:1(9Z))	GP	PC	MS2-MetDNA	0.8929	-	71099.9	193210	339630	266843	210077	276917	126115	118304	113693	121744	88476.9	84125.2	68135.6	50070.2	45724.4	54360.3	32625.6	32952.8	71448.6	86167.3	108828	78191.7	70035.3	51096.1	42513.5	2.08163	0.00191335	0.349998	-1.51458	down
MW0057005	C48H84NO8P	PC(18:1(11Z)/22:5(7Z,10Z,13Z,16Z,19Z))	GP	PC	MS2-MetDNA	0.8211	-	92121.7	48222.3	40330.1	198132	362868	184553	194650	256709	217815	187277	129348	115200	108070	59588.8	71237.9	67635.5	51478.9	48369.5	61025.5	40934.3	48377.6	38736.2	220673	240344	84811.9	1.27148	0.0274258	0.518258	-0.948257	insig
MW0056999	C46H80NO8P	PC(18:1(11Z)/20:5(5Z,8Z,11Z,14Z,17Z))	GP	PC	MS2-MetDNA	0.8953	-	198319	51855.7	65412.5	78233	188127	27505.2	141845	88078	106896	162198	95006.8	137369	251834	274189	222119	66928.2	133952	151444	101733	73800.6	127052	291600	134181	59630.5	142037	0.848507	0.150462	1.36096	0.444625	insig
MW0056986	C44H84NO8P	PC(18:1(11Z)/18:1(11Z))	GP	PC	MS2-MetDNA	0.9442	-	810524	567893	180911	221687	802285	146172	167089	182691	140365	775505	146090	183633	131955	98451.2	81412.9	63761.2	70256.4	152010	114974	224332	156397	546287	402225	79525.2	69299.7	1.42791	0.042166	0.420615	-1.24943	down
MW0056985	C44H86NO8P	PC(18:1(11Z)/18:0)	GP	PC	MS2-MetDNA	0.9602	-	216879	514631	197535	44906.8	136264	327129	485403	267101	219871	169221	130112	64898.2	25713.4	8573.04	7629.56	1600.89	42453.4	11167.6	185222	58158.9	15787.3	7568.36	9812.12	30751.8	88783.5	2.03189	0.00128139	0.177911	-2.49077	down
MW0056962	C46H86NO8P	PC(18:0/20:3(5Z,8Z,11Z))	GP	PC	MS2-MetDNA	0.7868	-	98945.2	7511.53	103421	333289	521403	1.95159e+06	763680	139296	620925	250097	129681	233182	153159	91164	75093.5	95671.1	52483.6	63792.9	111194	76878.7	57919	68955.5	198500	307232	635210	0.834094	0.113845	0.327076	-1.6123	insig
MW0056956	C44H82NO8P	PC(18:0/18:3(6Z,9Z,12Z))	GP	PC	MS2-MetDNA	0.9611	-	1.15408e+06	419891	92914.4	299152	199057	97187.1	103078	74097.2	18973.4	27265.6	35421.7	38918.4	68688	110334	241683	132014	162276	408505	75989.5	92675.4	129309	156925	105049	172847	187249	0.106605	0.355973	0.568019	-0.815988	insig
MW0056953	C44H86NO8P	PC(18:0/18:1(11Z))	GP	PC	MS2-MetDNA	0.9668	-	1.45316e+06	109736	517495	17312.4	589434	1.83689e+06	624572	1.46133e+06	924794	1.13817e+06	1.07865e+06	347495	437191	205782	200659	13767.4	48279.8	765726	887916	459364	285348	1.00812e+06	50370.6	1.21539e+06	755811	0.581311	0.128847	0.596485	-0.745443	insig
MW0056928	C44H82NO8P	PC(16:1(9Z)/20:2(11Z,14Z))	GP	PC	MS2-MetDNA	0.9614	-	69070.1	570698	366951	131476	369385	122250	55512.4	45563.4	43998.4	21404.2	6182.27	13338.9	33471	24971.5	28213	29443.5	33403.1	45596	57675.3	237245	63577.6	53906.7	62595.4	48387.1	52503.1	1.25615	0.0645419	0.293383	-1.76914	insig
MW0056927	C44H84NO8P	PC(16:1(9Z)/20:1(11Z))	GP	PC	MS2-MetDNA	0.9275	-	149688	115545	107697	102359	143511	36848.8	175080	190237	285080	272562	176590	184722	396580	91699.1	69977.6	45267.5	33164.3	7019.31	16305	1818.12	983.417	97177.9	74672.9	1249.95	2230.29	1.39355	0.0446248	0.506546	-0.981234	insig
MW0056926	C36H72NO8P	PC(16:1(9Z)/20:0)	GP	PC	MS2-MetDNA	0.8639	-	110163	104621	83076.3	101717	106861	98101.3	83528.2	101225	117376	73339.2	100168	110738	112156	136795	55111	145274	145013	189479	32113.9	170063	172450	184344	174780	145768	114880	0.847017	0.013728	1.35314	0.436313	insig
MW0056920	C42H80NO8P	PC(16:1(9Z)/18:1(11Z))	GP	PC	MS2-MetDNA	0.9858	-	239553	3.22165e+06	1.48759e+07	2.07218e+06	7.30232e+06	2.29138e+06	1.43558e+06	605380	225330	283276	287525	274193	1.28421e+06	2.72822e+06	642742	523565	446882	537548	620834	1.58382e+06	2.55248e+06	1.58079e+06	4.37624e+06	883242	611954	0.401129	0.210747	0.387768	-1.36674	insig
MW0056895	C44H82NO8P	PC(16:0/20:3(5Z,8Z,11Z))	GP	PC	MS2-MetDNA	0.9822	-	452694	282613	148958	270170	860927	134848	56802.2	39515.5	16707.9	21231	112784	26949.7	43055.7	27139.7	38688.4	38110.9	68408.6	452678	58434	90660.1	329980	89342.1	335577	65633	70660.9	0.486598	0.265232	0.539324	-0.890775	insig
MW0056894	C44H84NO8P	PC(16:0/20:2(11Z,14Z))	GP	PC	MS2-MetDNA	0.9278	-	17092.5	80121.9	139507	113094	189058	67375.9	88187.3	56481.7	64246.4	54419	43674.1	39889.8	22869.5	17933.9	9482.46	7912.34	6963.27	6911.97	6905.8	3315.54	30908.9	29797.8	20750.9	16095.8	11280.7	2.09002	0.00156495	0.210593	-2.24747	down
MW0056893	C44H86NO8P	PC(16:0/20:1(11Z))	GP	PC	MS2-MetDNA	0.9544	-	1.08085e+06	2.01548e+06	178874	437584	452570	1.15883e+06	1.4558e+06	1.25049e+06	4.14931e+06	853175	747862	482002	289560	114637	128534	116165	154193	597678	650904	156517	826301	178499	1.06653e+06	533664	794767	1.46907	0.0445955	0.349771	-1.51552	down
MW0056892	C44H88NO8P	PC(16:0/20:0)	GP	PC	MS2-MetDNA	0.5524	-	101570	71894.3	83525.5	86332.5	106552	28622.8	53930.3	105695	159855	90451.6	100858	73678	89844.9	177240	116300	63167.9	78692.9	214755	101331	127402	60704.3	127604	209522	69617.1	204217	0.856033	0.0868117	1.36191	0.445627	insig
MW0056886	C42H82NO8P	PC(16:0/18:1(11Z))	GP	PC	MS2-MetDNA	0.9948	-	56133.7	615457	704224	479426	175063	462811	154628	139854	71379.9	89526.2	53629.1	58961.9	62463.1	80662.6	71173.9	58717.9	81988.4	108346	95962.4	538602	328786	109226	110354	92480	86940	1.09352	0.0727724	0.438255	-1.19016	insig
MW0056869	C45H86NO8P	PC(15:0/22:2(13Z,16Z))	GP	PC	MS2-MetDNA	0.7115	-	69770.7	34169.6	46227.8	54674.2	60993.8	20855.6	44785.1	68057.1	82558.7	54531.7	64068.4	47107.2	76876.9	94270.2	72605.5	43918.1	47003.7	111167	72695.1	62972.4	46362	91336.8	105878	44972	103768	1.07354	0.0377455	1.34793	0.43075	insig
MW0056836	C44H82NO8P	PC(14:1(9Z)/22:2(13Z,16Z))	GP	PC	MS2-MetDNA	0.9694	-	132606	77854.1	3263.49	40822	10925.4	512.621	187.982	234.949	22375.4	33989.2	1116.66	1272.33	13767	257.943	3438.01	7963.46	2980.76	482687	3792.88	5262.67	11769.5	3162.09	504.166	20571	4849.07	0.270862	0.880359	1.16366	0.218671	insig
MW0056834	C44H86NO8P	PC(14:1(9Z)/22:0)	GP	PC	MS2-MetDNA	0.9582	-	294786	147240	32828.5	28578.2	72763.9	206358	207472	159513	153024	666807	123177	70425.6	24881.8	7599.44	34420.9	7709.33	3667.5	52426	112813	36773.3	5823.01	2629.93	23158.9	92047.3	128725	1.67398	0.0324449	0.245858	-2.0241	down
MW0056827	C42H80NO8P	PC(14:1(9Z)/20:1(11Z))	GP	PC	MS2-MetDNA	0.9417	-	51475.6	36727.9	2.54634e+06	3.65062e+06	2.37007e+06	1.84063e+06	1.62481e+06	651191	253874	135020	147720	133794	124728	230338	272971	248271	224557	209551	243305	287689	1.53232e+06	1.2706e+06	601940	388838	488109	0.578322	0.0583477	0.324435	-1.624	insig
MW0056826	C42H82NO8P	PC(14:1(9Z)/20:0)	GP	PC	MS2-MetDNA	0.9875	-	837773	1.94286e+06	998004	312722	756793	548188	550055	353271	228310	1.04162e+06	319167	237602	260423	196141	148085	492381	215758	482825	471636	701834	359653	638975	1.0123e+06	279803	364483	1.21344	0.0660774	0.544376	-0.877325	insig
MW0056803	C44H84NO8P	PC(14:0/22:2(13Z,16Z))	GP	PC	MS2-MetDNA	0.9233	-	510089	328544	151769	1.10067e+06	162677	131229	516660	853364	4.4437e+06	855224	678476	687785	542602	1.21318e+06	173662	112280	97880.3	369543	231965	67630.8	86141.3	410876	477609	100344	89352.5	0.982468	0.216376	0.39315	-1.34685	insig
MW0056795	C42H80NO8P	PC(14:0/20:2(11Z,14Z))	GP	PC	MS2-MetDNA	0.9457	-	107770	84241.3	239223	407021	217734	181093	152273	57391	30038.7	9504.82	10709.3	11538.4	14944.1	25317.2	53924.8	28906.4	28838.2	77937.1	35233.1	44957.9	156323	135812	74903.3	51740.9	77117.1	1.11108	0.0378693	0.371485	-1.42862	down
MW0056794	C42H82NO8P	PC(14:0/20:1(11Z))	GP	PC	MS2-MetDNA	0.9927	-	3618.83	61045.4	67097.6	43077.5	18173.2	41333.7	7923.15	2376.71	766.195	616	608.433	1749.94	1557.43	2074.89	2183.18	2372.66	3696.67	4643.99	2762.13	53275.4	31076.6	5469.63	6046.84	3122.77	388.088	0.813048	0.0922242	0.327953	-1.60844	insig
MW0056793	C42H84NO8P	PC(14:0/20:0)	GP	PC	MS2-MetDNA	0.9623	-	4450.64	112288	247822	602462	3.79179e+06	2.98614e+06	349882	303199	163412	89751	45102.9	42718.6	36630.5	56114.3	61737.5	58704.2	76529.6	67328.4	89820.5	147968	165430	230986	296846	196840	144129	0.979295	0.113648	0.132304	-2.91807	insig
MW0056787	C40H78NO8P	PC(14:0/18:1(11Z))	GP	PC	MS2-MetDNA	0.5893	-	313551	588424	724559	380325	493247	292106	697334	443393	605399	599695	603922	383878	633352	304586	701380	264509	811604	332835	402289	639102	284823	472159	369793	621373	280117	0.410782	0.555617	0.921977	-0.117198	insig
MW0056686	C40H79O8P	PA(i-22:0/i-15:0)	GP	PA	MS2-MetDNA	0.9864	-	140832	966325	1.81931e+06	96886	366900	70928	204828	60828.6	17532.9	25258	34188.4	33462.9	45046.5	97843.1	79443.2	58520.9	108257	133216	89982.8	309812	209541	168111	218387	142742	139630	0.38729	0.204423	0.330392	-1.59775	insig
MW0056679	C40H79O8P	PA(i-22:0/a-15:0)	GP	PA	MS2-MetDNA	0.8899	-	353566	158933	491039	630969	430888	931843	1.60437e+06	1.48307e+06	855365	956725	724702	582303	350021	130030	114749	102474	106397	98803.2	624326	207325	343937	293593	196004	157852	500463	1.64309	0.010599	0.382686	-1.38577	down
MW0056235	C47H81O8P	PA(22:1(13Z)/22:5(7Z,10Z,13Z,16Z,19Z))	GP	PA	MS2-MetDNA	0.5461	-	22113.3	13080.8	20857	21396	21559.4	1561.42	15654	20906.1	41302.7	14947.7	20854.1	12514.7	21230	36061.7	19121	14219.7	13426.2	46942.6	23476.9	17932.7	8893.55	37868.3	49143.8	11265.6	50680.5	0.631602	0.216584	1.32256	0.403332	insig
MW0056234	C47H81O8P	PA(22:1(13Z)/22:5(4Z,7Z,10Z,13Z,16Z))	GP	PA	MS2-MetDNA	0.691	-	37141.4	19834.6	26142.4	30842.8	33631.4	11066.2	26283.8	31543.2	29748.2	19617.9	25678.9	12093.6	30649.9	28599.7	20839.1	15297.5	13274.3	43566.6	28410.1	20325.8	13993.9	40815.3	36975.6	13308.3	38435.2	0.292896	0.771559	0.958589	-0.061016	insig
MW0056226	C45H81O8P	PA(22:1(13Z)/20:3(8Z,11Z,14Z))	GP	PA	MS2-MetDNA	0.6058	-	13787	24155.5	28704.1	30910.7	21326.6	7182.17	3820.3	1939.26	1779.11	1308.51	2203.61	4443.83	5658.15	15417.6	16555	3442.85	11160.6	6536.03	4874.2	49465.4	41873.7	29733.1	24829.1	11557.4	8986.88	0.500312	0.669667	1.16983	0.226294	insig
MW0056221	C44H81O8P	PA(22:1(13Z)/19:2(10Z,13Z))	GP	PA	MS2-MetDNA	0.9503	-	618043	331601	209837	10234.4	133305	38444.2	587001	1.19527e+06	93005.9	711537	736971	1.53587e+06	623611	209183	185405	106822	210890	92522.1	248558	91131	98291.3	193384	287035	5477.7	24071.3	0.303754	0.605122	0.789017	-0.341872	insig
MW0056211	C40H77O8P	PA(22:1(13Z)/15:0)	GP	PA	MS2-MetDNA	0.9789	-	2.46133e+06	2.49047e+06	1.2538e+07	5.77931e+06	3.35546e+06	2.19867e+06	1.21114e+07	1.10085e+06	422704	331453	1.23012e+06	1.12645e+06	284682	2.42052e+06	2.72006e+06	2.58951e+06	466165	2.11561e+06	2.22791e+06	5.07819e+06	7.7076e+06	3.02496e+06	1.33295e+06	884822	661576	0.46845	0.208922	0.527715	-0.922168	insig
MW0056202	C42H83O8P	PA(22:0/i-17:0)	GP	PA	MS2-MetDNA	0.9179	-	1.15973e+07	7.1142e+06	2.23672e+06	2.64374e+06	1.18974e+06	3.63596e+06	3.47287e+06	1.22408e+07	1.97672e+06	2.04166e+06	5.94352e+06	3.93454e+06	847708	218224	259635	221222	351622	234901	3.16018e+06	491622	525123	790536	425857	593726	5.55397e+06	1.75921	0.038053	0.3261	-1.61662	down
MW0056188	C47H81O8P	PA(22:0/22:6(4Z,7Z,10Z,13Z,16Z,19Z))	GP	PA	MS2-MetDNA	0.7323	-	185489	99343.4	298729	162489	181191	52882.2	281615	180725	221003	154705	417205	266876	510507	566098	525122	360982	255389	323467	455059	154575	112016	577989	610883	267831	300958	1.60241	0.000363009	2.09183	1.06476	up
MW0056179	C45H81O8P	PA(22:0/20:4(8Z,11Z,14Z,17Z))	GP	PA	MS2-MetDNA	0.8458	-	7945.29	2762.28	1613.22	3452.85	9851.01	14000	11005.3	8048.47	6101.27	6027.56	4511.81	3233.26	1011.46	1394.38	1049.25	383.298	1632.05	1306.54	3675.18	1493.03	1294.87	615.427	2477.45	5552.91	5231.96	1.82258	0.00372193	0.328242	-1.60717	down
MW0056139	C37H73O8P	PA(21:0/a-13:0)	GP	PA	MS2-MetDNA	0.6731	-	203648	110258	184371	200143	221334	55813.4	168343	216758	324191	155268	200092	130174	236562	351543	250053	125759	133900	467793	255894	191046	112566	388585	423073	150148	442766	0.809211	0.076769	1.39844	0.483815	insig
MW0055915	C40H79O8P	PA(20:0/i-17:0)	GP	PA	MS2-MetDNA	0.5936	-	13014.9	8215.96	14249.6	13660.5	15433	3397.33	9899.84	12135.9	29270.9	9288.95	12018.9	8184.72	12577	23068.3	14066.1	8288.08	9134.17	30616.2	14630.6	10662.5	4982.4	23633.3	30161.2	8576.01	31157.1	0.450793	0.315482	1.2536	0.326072	insig
MW0055907	C40H79O8P	PA(20:0/a-17:0)	GP	PA	MS2-MetDNA	0.7617	-	216687	119469	177143	197884	225835	65848.3	159696	230324	294454	176960	228779	173429	296735	332665	288289	165903	87084.9	413531	250045	200368	155113	342541	368755	88358.7	364147	0.745724	0.0683331	1.34304	0.425502	insig
MW0055896	C45H87O8P	PA(20:0/22:1(13Z))	GP	PA	MS2-MetDNA	0.5419	-	298.784	72.7559	433.129	337.582	371.626	2405.43	1832.1	2226.59	1350.32	2859	3043.55	2720.55	3191.07	2779.28	2298.5	4244.66	4154.41	1952.18	3081.45	2500.47	2611.07	1675.51	910.342	2588.42	2718.77	1.70156	0.00169067	2.21379	1.14652	up
MW0154729	C20H35D4NO2	Oleoyl Ethanolamide-d4	FA	FFA	MS2-Search-DB	0.8383	-	2.01258e+06	2.06402e+06	2.49015e+06	1.9509e+06	2.90032e+06	2.06795e+06	2.43004e+06	2.7731e+06	3.3136e+06	2.77448e+06	1.73959e+06	3.57654e+06	1.41506e+06	1.94725e+06	2.82506e+06	2.64185e+06	3.16039e+06	2.60314e+06	2.4903e+06	2.77006e+06	3.13491e+06	1.91583e+06	2.18373e+06	3.18135e+06	5.06708e+06	0.231462	0.401608	1.09381	0.129359	insig
MW0055397	C36H60O10	Notoginsenoside T1	Terpenoids	Triterpene	MS2-Insilico	0.5077	-	5.80239e+06	5.06926e+06	3.99276e+06	5.43328e+06	6.59816e+06	6.26312e+06	3.4025e+06	5.70093e+06	5.90037e+06	2.83686e+06	4.76733e+06	5.07127e+06	5.41966e+06	7.5006e+06	7.61903e+06	5.17257e+06	1.12365e+07	8.4897e+06	6.28304e+06	6.14337e+06	6.38111e+06	6.75868e+06	6.58128e+06	8.51892e+06	6.08072e+06	1.42241	0.00860868	1.33365	0.415384	insig
MW0055318	C18H27NO	N-Isobutyl-2,4,8,10,12-tetradecapentaenamide	FA	Others	MS2-Insilico	0.5701	-	118124	112812	105175	111080	117374	117539	104829	107279	109191	116766	122816	104970	113481	110870	107879	103520	110153	105744	106185	108630	112429	112469	112435	105112	114637	0.562871	0.370894	0.982786	-0.0250506	insig
MW0127526	C7H8S	Methyl phenyl sulfide	Others	Others	MS2-Insilico	0.6049	-	144231	142467	171524	144309	141513	158225	131023	168511	159624	156242	149492	126196	156920	154038	161185	119243	146604	179902	122194	129034	167063	155929	183317	144660	142723	0.219907	0.700647	0.983305	-0.0242888	insig
MW0108238	C17H30N6O4S	Met-His-Lys	Amino acid and Its metabolites	Small Peptide	MS2-Search-DB	0.5478	-	798215	1.15805e+06	1.23435e+06	800697	975135	712634	1.2497e+06	909510	1.14434e+06	1.14073e+06	1.16098e+06	843192	1.17644e+06	698300	1.20116e+06	675217	1.33109e+06	776751	845217	1.12693e+06	708919	954595	795209	1.1327e+06	674132	0.517071	0.408203	0.928599	-0.106872	insig
MW0153504	C14H25N5O6S1	Met-Asn-Gln	Amino acid and Its metabolites	Small Peptide	MS2-Search-DB	0.854	-	53803.9	52679.7	52096.9	51187.6	53388.2	55108.9	50727.4	51781.5	54130.1	51566.8	1.718e+06	5.40094e+06	174.921	52568.8	1.81565e+06	519497	93.0613	767686	50500.6	51698.5	54535.1	48.0071	49330.5	49519.1	48017.3	0.195777	0.100045	13.3952	3.74364	insig
MW0054544	C28H50NO7P	LysoPC(20:4(5Z,8Z,11Z,14Z))	GP	LPC	MS2-MetDNA	0.9549	-	796825	708037	467663	523052	511535	638394	795467	527311	662542	377463	1.42344e+06	552890	1.17437e+06	1.06263e+06	936134	1.3576e+06	504999	1.79448e+06	887798	1.12879e+06	670301	1.30518e+06	877190	813475	854068	1.73882	0.000463416	1.70247	0.767626	insig
MW0054501	C25H49O7P	LysoPA(22:1(13Z)/0:0)	GP	LPA	MS2-MetDNA	0.8491	-	490943	522857	344368	319683	371044	434923	445035	394919	473194	414347	400522	389840	262400	320930	423314	436194	453579	588689	348843	466816	466843	421729	388299	459192	499012	0.0935892	0.983083	1.00146	0.00210717	insig
MW0054488	C21H41O7P	LysoPA(18:1(9Z)/0:0)	GP	LPA	MS2-MetDNA	0.9555	-	255771	292198	581695	368829	287117	287033	410875	277497	495575	368913	302430	446453	302587	274241	395189	470735	847371	212650	524258	210387	227464	221229	184873	384183	289751	0.366381	0.864751	0.973437	-0.0388398	insig
MW0153022	C23H46N6O5	Lys-Ile-Val-Lys	Amino acid and Its metabolites	Small Peptide	MS2-Search-DB	0.8753	-	28964.1	21839.8	27678.9	34670.7	20278.1	26058.6	36166.5	24490.7	28380.4	77151.2	33225.9	31741.8	104083	35319.2	69309.5	116857	40891.1	98437.8	32372	60066.9	28322.9	48293	41124.8	60760.9	32196	1.42718	0.0199128	1.70516	0.769905	insig
MW0152573	C25H45N5O8	Leu-Val-Val-Val-Asp	Amino acid and Its metabolites	Small Peptide	MS2-Search-DB	0.7188	-	1.19795e+06	1.10963e+06	1.10019e+06	1.12417e+06	1.01543e+06	1.50044e+06	1.36552e+06	960569	1.4279e+06	961670	1.3162e+06	1.27504e+06	1.24596e+06	1.15863e+06	1.67092e+06	2.23308e+06	1.46621e+06	1.63649e+06	1.4782e+06	1.21451e+06	1.36704e+06	1.66121e+06	1.20424e+06	1.24157e+06	1.20002e+06	1.31861	0.0161622	1.21105	0.276263	insig
MEDP1682	C17H25N3O4	Leu-Gly-Phe	Amino acid and Its metabolites	Small Peptide	MS2-Search-Local	0.6206	-	18262	21226.3	16414.3	31932.5	18057.9	21811.4	15422	16579.7	28272.5	12223.1	22462.8	30419.4	18524.3	44589.6	29580.3	34069.8	13245.8	29531.5	19254.2	40744.3	14918.9	23938.1	34940.6	21985.4	25873.4	1.09968	0.0318834	1.34557	0.428219	insig
MW0152259	C13H23N3O6S1	Leu-Asp-Cys	Amino acid and Its metabolites	Small Peptide	MS2-Search-DB	0.6337	-	401596	460382	490807	512198	469451	410003	415617	449407	536834	478097	563722	408506	209980	292376	356510	279295	260070	199217	135282	376745	199693	161598	227054	169673	166163	1.97727	1.10552e-05	0.577501	-0.792106	insig
MW0152139	C41H60O9	Lasonolide A	Heterocyclic compounds	Heterocyclic compounds	MS2-Insilico	0.5618	-	5.40867e+06	4.67647e+06	3.56843e+06	4.72083e+06	5.93227e+06	5.72894e+06	3.20452e+06	5.21241e+06	5.34337e+06	2.59051e+06	4.37085e+06	4.32758e+06	4.57327e+06	6.59173e+06	6.55027e+06	4.77077e+06	9.65469e+06	7.29087e+06	5.33878e+06	5.28738e+06	5.51975e+06	5.86266e+06	5.53302e+06	7.35377e+06	5.15812e+06	1.25692	0.024782	1.26738	0.341844	insig
MEDP1325	C30H51NO7P	LPC(22:6/0:0)	GP	LPC	MS2-Search-Local	0.7747	-	206117	358335	391502	695001	631536	199078	626124	352629	575526	314442	199748	974429	960323	608623	724838	806393	135068	1.13672e+06	433149	204187	543966	769517	605032	124497	59642.8	0.122934	0.28329	1.26982	0.344625	insig
MEDP1322	C30H53NO7P	LPC(22:5/0:0)	GP	LPC	MS2-Search-Local	0.8959	-	252319	171659	94986.8	213233	135911	142895	215517	47138.4	201646	697334	226657	1.34227e+06	390422	20344.5	337689	473691	143682	352193	242590	338304	164088	212648	106133	176492	136755	0.313926	0.349887	1.43112	0.517144	insig
MEDP1334	C28H51NO7P	LPC(20:4/0:0)	GP	LPC	MS2-Search-Local	0.8923	-	8.29499e+06	8.46655e+06	5.54819e+06	7.37e+06	7.7566e+06	6.97881e+06	7.3173e+06	5.38184e+06	1.00941e+07	7.32263e+06	9.33541e+06	9.81881e+06	1.41076e+07	9.84959e+06	1.18752e+07	1.10243e+07	7.21165e+06	1.51451e+07	9.51091e+06	8.97271e+06	1.1088e+07	1.40901e+07	7.4426e+06	5.23918e+06	8.66063e+06	1.44468	0.00305783	1.37188	0.456158	insig
MEDP1326	C28H57NO7P	LPC(20:1/0:0)	GP	LPC	MS2-Search-Local	0.8895	-	89609.6	53899.2	59239.2	49943.4	53308.3	90542.9	70726.7	55954.7	101798	74031.5	65516.2	92860	47856.3	65463.2	99949.4	122032	119655	72835.7	113836	75789	100023	90679.5	76807.4	88704.3	67474.6	1.03004	0.0519087	1.23928	0.3095	insig
MEDP1348	C24H49NO7P	LPC(16:1/0:0)	GP	LPC	MS2-Search-Local	0.9299	-	1.21549e+06	1.21498e+06	1.60651e+06	1.79816e+06	1.59747e+06	2.11241e+06	1.93931e+06	964929	1.76346e+06	763063	1.55064e+06	2.14573e+06	1.95667e+06	1.49464e+06	2.34252e+06	3.7983e+06	1.56477e+06	3.10546e+06	1.42735e+06	1.43061e+06	1.8037e+06	2.16873e+06	1.18891e+06	1.54182e+06	1.26081e+06	0.956338	0.0830084	1.28121	0.357507	insig
MEDP0494	C23H48NO7P	LPC(15:0/0:0)	GP	LPC	MS2-Search-Local	0.7936	-	329397	379121	198001	270870	252696	406133	365205	271516	456867	161750	623566	477973	351938	286766	438218	495932	592232	863324	332154	489015	430020	386371	195303	365971	252735	1.12807	0.02125	1.41925	0.505126	insig
MEDP1318	C30H55NO7P	LPC(0:0/22:4)	GP	LPC	MS2-Search-Local	0.7017	-	157789	136345	83224.3	194478	92825.8	131330	121819	75109	210687	134328	91094	336944	222882	89692.8	254369	216620	100293	313607	148981	85175.8	106324	206240	84566.1	71299.1	106470	0.272812	0.302949	1.21309	0.278689	insig
MEDP1336	C28H49NO7P	LPC(0:0/20:5)	GP	LPC	MS2-Search-Local	0.8784	-	118372	179991	102252	130998	130207	129791	229759	148931	182384	39581.2	683919	127419	279673	634908	128876	1.08514e+06	109921	559743	188244	2.3188e+06	263933	268589	1.02961e+06	1.17469e+06	194810	1.6773	0.00987856	4.33263	2.11524	up
MEDP1331	C28H53NO7P	LPC(0:0/20:3)	GP	LPC	MS2-Search-Local	0.9234	-	499332	375669	366144	568178	561729	456419	548245	314350	614417	384633	517345	866898	478345	566541	763435	759152	371450	1.08458e+06	506090	510740	634229	667575	495631	292371	506975	0.93689	0.0427101	1.28259	0.359065	insig
MEDP1330	C28H55NO7P	LPC(0:0/20:2)	GP	LPC	MS2-Search-Local	0.899	-	357931	207825	178269	222785	242873	331541	249377	177129	277412	170428	265782	376094	237243	271166	335246	564029	269190	507128	321429	216930	262412	268185	285860	302168	217149	1.12015	0.0401539	1.29714	0.37534	insig
MEDP1343	C26H49NO7P	LPC(0:0/18:3)	GP	LPC	MS2-Search-Local	0.8355	-	569192	432265	185748	205363	188165	232665	118497	260243	325868	111619	431860	421097	294733	498905	271579	848519	271803	957626	768052	201076	306139	549952	145141	222642	254971	1.0597	0.0462746	1.63372	0.708158	insig
MW0054131	C9H18O2	Isopropyl hexanoate	Aldehyde,Ketones,Esters	Esters	MS2-Insilico	0.5591	-	160132	69564.9	147926	61197.3	66900.4	81308	161983	159429	145194	161276	189407	60277.1	92504.8	195214	150793	62396.6	67977.3	164063	143249	67843	66031.2	56763.4	59059.1	48329.7	50914.2	0.763636	0.257244	0.80929	-0.305271	insig
MW0107555	C24H40N5O8	Isodesmosine	Heterocyclic compounds	Heterocyclic compounds	MS2-Search-DB	0.8816	-	934209	816598	684395	921180	1.04871e+06	1.00757e+06	548793	838904	926458	488485	805137	837263	791511	1.13225e+06	1.21669e+06	841688	2.31307e+06	1.2279e+06	889022	851658	1.00874e+06	1.05424e+06	1.0399e+06	1.2026e+06	905541	1.19411	0.0374372	1.3079	0.387254	insig
MW0151352	C19H28N4O5	Ile-Asn-Phe	Amino acid and Its metabolites	Small Peptide	MS2-Search-DB	0.873	-	3.15637e+06	2.94104e+06	3.31576e+06	4.19571e+06	3.39769e+06	3.20552e+06	2.04062e+06	2.85982e+06	3.87293e+06	2.14317e+06	2.96993e+06	2.90282e+06	2.81917e+06	3.57556e+06	3.81974e+06	2.86511e+06	7.78949e+06	3.97194e+06	2.88511e+06	2.83349e+06	3.2397e+06	3.60025e+06	3.83344e+06	3.25093e+06	3.11505e+06	0.641578	0.251011	1.14518	0.195572	insig
MW0151330	C29H56N8O6	Ile-Arg-Ile-Ile-Val	Amino acid and Its metabolites	Small Peptide	MS2-Search-DB	0.7963	-	93778.4	47548.2	94828.2	101079	90340.9	19947	52915.3	107871	274641	74468.5	97445.4	69849.7	111154	189677	123180	66491.7	69617.2	185335	113322	97338.9	54469.5	159946	250414	99305.7	185917	0.878154	0.282496	1.30453	0.383525	insig
MW0010223	H2O3S2	Hydroxidodioxidosulfidosulfate	Heterocyclic compounds	Heterocyclic compounds	MS2-Insilico	0.6833	-	414076	714079	508743	457677	562423	203692	1.05022e+06	247708	972886	965741	841848	545742	485548	231691	1.01282e+06	1.14472e+06	609538	292170	1.35807e+06	518666	298098	280590	1.29252e+06	904711	291366	0.0981221	0.649684	1.10521	0.14432	insig
MW0151054	C28H32N6O8	His-Phe-Tyr-Asp	Amino acid and Its metabolites	Small Peptide	MS2-Search-DB	0.7111	-	16286.7	33538.5	18271.2	107423	48260.1	110076	47023.8	109627	47375.7	15496.7	27594.5	37914.4	36294	4891.94	30764.4	22931.3	89020.6	55750.7	40652.4	11949.2	17685.4	37184	35211.2	3128.1	340.805	0.94234	0.0881006	0.543706	-0.879103	insig
MW0107324	C21H30N8O4	His-Phe-Arg	Amino acid and Its metabolites	Small Peptide	MS2-Search-DB	0.8245	-	137258	140231	146932	137010	130501	184203	155496	143465	155921	113677	165568	170628	171604	144560	173693	211249	165704	186780	166583	154416	170028	145700	122149	139343	140576	1.09722	0.0436606	1.12069	0.164387	insig
MW0151003	C27H41N7O6	His-Leu-Tyr-Lys	Amino acid and Its metabolites	Small Peptide	MS2-Search-DB	0.6417	-	2.13519e+06	1.84009e+06	1.73769e+06	2.27562e+06	2.86619e+06	2.55251e+06	1.26865e+06	2.14608e+06	2.32281e+06	1.24552e+06	1.93848e+06	2.00423e+06	2.8144e+06	2.8636e+06	2.58586e+06	2.12369e+06	1.85596e+06	3.30578e+06	2.61472e+06	2.4676e+06	2.92029e+06	2.47417e+06	2.53315e+06	3.12067e+06	2.4787e+06	1.4023	0.0221992	1.24573	0.316992	insig
MW0150836	C23H40N10O7	His-Arg-Lys-Glu	Amino acid and Its metabolites	Small Peptide	MS2-Search-DB	0.8936	-	4.13612e+06	3.60764e+06	2.89027e+06	3.94577e+06	4.50479e+06	4.40191e+06	2.48333e+06	3.71775e+06	3.89124e+06	2.14227e+06	3.51296e+06	3.68646e+06	3.54821e+06	4.88088e+06	5.21727e+06	3.73911e+06	8.99056e+06	5.31748e+06	3.98848e+06	3.78264e+06	4.40502e+06	4.65785e+06	4.39285e+06	5.31119e+06	4.02861e+06	1.2781	0.0231297	1.29633	0.374435	insig
MW0150835	C30H54N10O6	His-Arg-Leu-Leu-Leu	Amino acid and Its metabolites	Small Peptide	MS2-Search-DB	0.6257	-	1255.53	1241.88	690.142	190.193	287.222	799.682	971.659	567.443	285.86	440.577	521.35	314.497	387.193	1866.29	443.757	380.382	186.102	385.962	2856.71	355.048	534.845	646.563	302.397	748.757	788.855	0.0884275	0.852981	1.06175	0.0864483	insig
MW0150455	C28H45N5O6	Gly-Phe-Leu-Leu-Val	Amino acid and Its metabolites	Small Peptide	MS2-Search-DB	0.6897	-	450250	392745	309453	424973	525584	485207	258207	419054	484024	234030	373763	412966	421924	580927	619758	411176	1.18808e+06	676214	468194	474087	491413	518813	516968	656799	465174	1.35395	0.0183275	1.38508	0.46997	insig
MW0150409	C22H40N6O7	Gly-Leu-Ser-Pro-Lys	Amino acid and Its metabolites	Small Peptide	MS2-Search-DB	0.7806	-	19813.7	17889.2	14692.4	13880.4	16742.4	17949.2	20780.8	23073.1	25345	25964	21783.2	27237.8	18994.4	21069.8	31635.9	30053.9	28742.3	23914	28943.3	24817	18951.5	23924.1	22665.2	37318.7	29842.8	1.53207	0.00256562	1.32529	0.406308	insig
MW0150398	C28H46N8O6	Gly-Leu-Arg-Val-Phe	Amino acid and Its metabolites	Small Peptide	MS2-Search-DB	0.7277	-	6.27295e+06	5.51044e+06	4.42171e+06	6.00893e+06	7.4332e+06	6.89413e+06	3.70906e+06	6.22654e+06	6.40009e+06	3.17657e+06	5.26652e+06	5.63493e+06	5.98704e+06	8.12029e+06	8.57065e+06	5.74914e+06	1.32715e+07	9.33926e+06	6.8478e+06	6.70332e+06	7.04899e+06	7.2948e+06	7.1991e+06	9.06148e+06	6.82508e+06	1.41802	0.00961071	1.343	0.425458	insig
MW0150397	C23H42N10O8	Gly-Leu-Arg-Asn-Gln	Amino acid and Its metabolites	Small Peptide	MS2-Search-DB	0.7491	-	2.95477e+06	2.64683e+06	2.49563e+06	3.22714e+06	3.76278e+06	3.40469e+06	1.87566e+06	3.05692e+06	3.33231e+06	1.79176e+06	2.75535e+06	2.80229e+06	3.41569e+06	3.88142e+06	3.44495e+06	2.72352e+06	2.46036e+06	4.44791e+06	3.5379e+06	3.27661e+06	3.65243e+06	3.4049e+06	3.43552e+06	4.29164e+06	3.35876e+06	1.21843	0.0465854	1.18837	0.248984	insig
MW0150327	C23H41N5O8	Gly-Asp-Ile-Val-Ile	Amino acid and Its metabolites	Small Peptide	MS2-Search-DB	0.7083	-	1.36443e+06	1.20011e+06	1.17385e+06	1.49291e+06	1.94978e+06	1.58942e+06	778000	1.39e+06	1.60403e+06	747715	1.23735e+06	1.24499e+06	1.73117e+06	1.87206e+06	1.64783e+06	1.31874e+06	1.32596e+06	2.20661e+06	1.64472e+06	1.54531e+06	1.77913e+06	1.58523e+06	1.70138e+06	2.02826e+06	1.6353e+06	1.2969	0.0424067	1.22918	0.297691	insig
MW0106966	C11H20N2O5	Glu-Leu	Amino acid and Its metabolites	Small Peptide	MS2-Search-DB	0.9176	-	1.48638e+07	1.50147e+07	1.47068e+07	1.56448e+07	1.52094e+07	1.56497e+07	1.54023e+07	1.47203e+07	1.45273e+07	1.53676e+07	1.57675e+07	1.28649e+07	1.46486e+07	1.45405e+07	1.27606e+07	1.35622e+07	1.37e+07	1.24313e+07	1.25635e+07	1.25423e+07	1.36061e+07	1.32573e+07	1.38609e+07	1.14505e+07	1.26171e+07	1.92732	1.43552e-05	0.883144	-0.17928	insig
MW0115720	CH2Cl2	Dichloromethane	Others	Others	MS2-Insilico	0.7017	-	688251	413273	286463	306565	284790	311430	313079	682709	320121	502670	349339	291425	332007	511108	289126	321846	575010	610061	209544	317598	315662	521364	326233	325274	321486	0.331547	0.545713	0.911269	-0.134051	insig
MW0148264	C30H46O2	Demethylphylloquinol	Alcohol and amines	Alcohols	MS2-Insilico	0.6969	-	421231	503755	395647	511144	591625	515867	491614	573113	390746	614779	373053	474732	441319	417538	499655	445009	535953	486492	463641	533661	554749	489140	496198	479892	501162	0.343363	0.454034	0.957136	-0.0632035	insig
MW0050935	C47H78O5	DG(22:1(13Z)/22:6(4Z,7Z,10Z,13Z,16Z,19Z)/0:0)	GL	DG	MS2-MetDNA	0.9546	-	526729	499958	471747	376367	440823	7780.29	337816	754340	819090	954869	686275	594798	476001	242756	160193	104183	91275.1	67385.1	113583	72391.6	269100	88693.8	97140.9	88017.4	146556	1.00222	0.00897004	0.423719	-1.23882	down
MW0050928	C45H76O5	DG(22:1(13Z)/20:5(5Z,8Z,11Z,14Z,17Z)/0:0)	GL	DG	MS2-MetDNA	0.8934	-	180596	299864	1.69793e+06	244623	264017	1.10169e+06	1.43963e+06	1.2868e+06	704053	868502	771524	2.67796e+06	1.44894e+06	153828	173562	152504	130222	368763	665937	259460	396018	257985	928640	366174	743155	0.647187	0.485162	0.782642	-0.353575	insig
MW0050800	C44H86O5	DG(21:0/i-20:0/0:0)	GL	DG	MS2-MetDNA	0.541	-	1.65935e+06	377107	1.68943e+06	1.01082e+06	982341	7.36972e+06	2.79828e+06	3.09948e+06	5.93761e+06	6.56415e+06	5.45028e+06	1.15234e+06	1.49279e+06	215152	224282	378005	186417	209710	1.21073e+06	232214	493672	1.29753e+06	988752	221312	3.24261e+06	1.50639	0.0413618	0.359833	-1.4746	down
MW0050214	C39H68O5	DG(18:3(6Z,9Z,12Z)/18:1(9Z)/0:0)	GL	DG	MS2-MetDNA	0.7502	-	133311	72339.8	127632	140990	145287	33969.3	103253	140271	235593	105070	129742	95133.6	166626	245935	170405	89883.2	97522.1	302439	162806	128338	77295.1	251555	283751	115285	290897	0.90233	0.072156	1.40453	0.490087	insig
MW0148148	C20H20N2O2	DAN-1 EE	Aldehyde,Ketones,Esters	Esters	MS2-Search-DB	0.6695	-	152618	198753	118831	157654	55564.9	130960	140310	83816.6	107414	112730	219653	181829	26492.2	46387.6	58309.4	94395.8	91814.5	192343	85404.6	35104	35537.7	72617.7	162298	13606.3	41117.8	1.22908	0.112067	0.718711	-0.476517	insig
MW0148132	C6H12N2O4	D-Alanyl-D-serine	Amino acid and Its metabolites	Small Peptide	MS2-MetDNA	0.7077	-	250584	256176	167536	239010	528521	226529	257440	158077	448668	574093	379631	243172	179517	568623	221942	171685	241767	155331	212414	543089	169700	173419	214451	159917	169055	0.623444	0.343958	0.816256	-0.292906	insig
MW0106268	C12H16N2O4S1	Cys-Tyr	Amino acid and Its metabolites	Small Peptide	MS2-Search-DB	0.5934	-	269887	329667	167879	486443	346815	328251	236527	186203	492939	228417	314413	307358	371019	474399	352697	205450	341230	303435	292896	305104	370845	296666	517058	427695	332641	0.7963	0.343854	1.13089	0.177464	insig
MEDTP01667	C17H27NO4	Carnitine C9:1-OH	FA	CAR	MS2-Search-Local	0.9171	-	359334	187705	775427	52963.7	132603	476917	172986	141068	164289	184413	613062	133814	966402	1.04293e+06	34621.3	199351	298924	60098.3	889305	251996	54289.9	259430	344990	329819	469103	0.342489	0.244018	1.49768	0.582733	insig
MEDTP01664	C21H41NO4	Carnitine C14:0	FA	CAR	MS2-Search-Local	0.8947	-	127513	153864	37161.2	118358	103426	127661	124773	106186	31947.8	176025	54165.9	63029.7	231374	85460	114215	76352.6	75081.3	241184	118865	64878	122114	188627	89818	51794.5	97240.5	0.0627429	0.96601	1.00833	0.0119631	insig
MEDP1515	C16H31NO4	Carnitine C9:0	FA	CAR	MS2-Search-Local	0.8344	-	100103	128673	32071.8	120659	96777.4	122388	67672.1	50189.6	39932.1	25131.5	36231.5	15763.9	71949	107056	72262.7	101052	62508.2	80537.1	97575.3	121461	120492	75200.4	148386	127628	74304.3	0.485286	0.565751	1.11656	0.159067	insig
MEDP1428	C15H27NO4	Carnitine C8:1	FA	CAR	MS2-Search-Local	0.7451	-	554695	1.09992e+06	995606	233499	445971	997511	395843	739408	287864	293895	923603	210215	863927	1.09221e+06	47659.3	429063	196636	120051	1.85526e+06	481044	466903	395209	235450	507181	710158	0.396508	0.826419	0.941349	-0.0871981	insig
MEDP1387	C26H47NO4	Carnitine C19:2	FA	CAR	MS2-Search-Local	0.5171	-	218327	212516	203027	206188	222358	221047	197582	205252	215883	215994	246163	199127	228026	210570	208513	203677	215365	220390	206291	202623	216030	208656	219530	210294	208631	0.181273	0.663237	1.00838	0.0120415	insig
MEDP1390	C25H47NO4	Carnitine C18:1	FA	CAR	MS2-Search-Local	0.8854	-	721363	661803	350742	652433	548181	944132	1.10221e+06	690727	288056	681116	393366	459353	708518	455876	704558	639521	541616	753841	667245	323450	1.36114e+06	1.11635e+06	438029	226358	549021	0.249525	0.704573	0.937467	-0.0931606	insig
MEDP1399	C23H41NO4	Carnitine C16:2	FA	CAR	MS2-Search-Local	0.7724	-	88525.3	122270	23675.1	55991.4	42444.2	77481.3	67437.3	34963.3	16660.4	41594.6	23168.2	20850.4	57672.2	30402.5	71617.6	31256.7	21378.8	65776.3	137062	24650.3	62483.9	102045	24091.5	37952.2	57705.7	0.273894	0.66544	0.896737	-0.157243	insig
MEDP1398	C23H43NO4	Carnitine C16:1	FA	CAR	MS2-Search-Local	0.8718	-	291238	216292	71576.5	252777	216903	307057	290188	198076	66343.6	171516	125778	107281	353236	163999	173209	163127	99105.8	409366	267050	94728.3	292932	448239	158415	67282.9	184654	0.0653235	0.98134	0.995343	-0.00673414	insig
MEDP1407	C21H37NO4	Carnitine C14:2	FA	CAR	MS2-Search-Local	0.9249	-	2.18288e+06	327628	127631	615493	940010	694451	492332	718538	268243	297703	533855	323669	1.26023e+06	562818	1.25896e+06	207571	88066.4	685788	681391	388801	1.0333e+06	2.00489e+06	542579	654433	1.08421e+06	0.323725	0.703311	1.13135	0.17805	insig
MEDP1412	C20H37NO4	Carnitine C13:1	FA	CAR	MS2-Search-Local	0.7806	-	76730.7	213892	29911	208734	109982	90065.9	55191.6	46846.2	22254.9	23200	146617	9184.48	73735.2	78640.5	139291	56827.1	125417	311421	38886.1	184179	58039.3	180668	592728	75823.9	61222.3	0.599669	0.227546	1.62155	0.69737	insig
MEDP1522	C20H39NO4	Carnitine C13:0	FA	CAR	MS2-Search-Local	0.8945	-	70837.8	124306	57516.4	86713.6	50559.5	111699	87680.5	70078.7	13515	21739.1	149708	13569.6	99850.6	198738	48197.4	128864	65145.9	84964	58642.8	399089	122966	43614.5	746402	488602	87269.3	1.03003	0.0538251	2.62544	1.39256	insig
MEDP1414	C19H35NO4	Carnitine C12:1	FA	CAR	MS2-Search-Local	0.7141	-	414866	145208	96013.8	286588	210885	263724	153150	148314	43132.4	106944	90570.8	50060.4	372338	130711	489220	94377	36317.1	1.41174e+06	717443	78381.9	175207	1.09593e+06	148105	66306.2	192623	0.239594	0.186658	1.83692	0.877292	insig
MW0146238	C11H17N3O6	Asp-Pro-Gly	Amino acid and Its metabolites	Small Peptide	MS2-Search-DB	0.7192	-	165683	164473	152095	150363	135553	148929	153764	139103	137882	143018	138758	163081	200254	125936	126880	134281	127309	118102	111861	129297	128730	139277	120392	97667.8	114106	1.22069	0.0223847	0.883574	-0.178576	insig
MW0146217	C24H36N8O8	Asp-Phe-Gln-Arg	Amino acid and Its metabolites	Small Peptide	MS2-Search-DB	0.806	-	3.13022e+06	2.68984e+06	2.41519e+06	3.33833e+06	3.70626e+06	3.51286e+06	1.85615e+06	2.91926e+06	3.12246e+06	1.67451e+06	2.87833e+06	2.85659e+06	3.04283e+06	3.82837e+06	3.4902e+06	2.89609e+06	2.40253e+06	4.11343e+06	3.28311e+06	2.99761e+06	3.70477e+06	3.47814e+06	3.16016e+06	3.95313e+06	3.18227e+06	1.1043	0.0901308	1.15794	0.211559	insig
MW0145720	C14H24N6O7	Asn-Gln-Gln	Amino acid and Its metabolites	Small Peptide	MS2-Search-DB	0.9012	-	266901	248839	331235	397220	349136	302320	134877	238751	392390	143791	254306	246712	275957	340598	296520	249697	304005	368208	273709	241240	286131	310951	278498	331946	285768	0.463782	0.77319	1.03233	0.0459062	insig
MW0145522	C22H45N11O6	Arg-Thr-Lys-Arg	Amino acid and Its metabolites	Small Peptide	MS2-Search-DB	0.7193	-	89803.5	66411.1	87151.8	48415.8	80422.9	89253.4	108074	130888	157685	149354	98632.7	171987	100983	119757	191508	171973	189433	144103	163203	152906	108970	124783	131058	159614	191062	1.57737	0.0033554	1.46902	0.554857	insig
MW0145509	C19H38N10O6	Arg-Thr-Ala-Arg	Amino acid and Its metabolites	Small Peptide	MS2-Search-DB	0.7057	-	5.58336e+06	4.86671e+06	4.09105e+06	5.40462e+06	6.6557e+06	6.13755e+06	3.23929e+06	5.33425e+06	5.81392e+06	2.99882e+06	4.53365e+06	4.98951e+06	5.17548e+06	6.90667e+06	7.6181e+06	4.96955e+06	1.41047e+07	7.98557e+06	5.86992e+06	5.76559e+06	6.2938e+06	6.22859e+06	6.6094e+06	7.84454e+06	5.92078e+06	1.28488	0.0244439	1.34085	0.423149	insig
MW0145452	C16H32N6O4S2	Arg-Met-Met	Amino acid and Its metabolites	Small Peptide	MS2-Search-DB	0.8399	-	2.20562e+06	2.90163e+06	2.92177e+06	2.14521e+06	2.51792e+06	2.01897e+06	2.92661e+06	2.32709e+06	3.05192e+06	3.15744e+06	3.06583e+06	2.41737e+06	3.1353e+06	2.16753e+06	3.37336e+06	2.48203e+06	3.43135e+06	2.40041e+06	2.55067e+06	2.92145e+06	2.24166e+06	2.6244e+06	2.42069e+06	3.07175e+06	2.20095e+06	0.264991	0.637079	1.03167	0.0449847	insig
MW0145433	C27H50N10O10	Arg-Lys-Asp-Lys-Glu	Amino acid and Its metabolites	Small Peptide	MS2-Search-DB	0.7718	-	3.75974e+06	3.35156e+06	3.23682e+06	4.14786e+06	4.63416e+06	4.2697e+06	2.45601e+06	3.97547e+06	4.35413e+06	2.27783e+06	3.67085e+06	3.77345e+06	4.55055e+06	5.06009e+06	4.59248e+06	3.57492e+06	3.29584e+06	5.81343e+06	4.47732e+06	4.31771e+06	4.68879e+06	4.60996e+06	4.36508e+06	5.37437e+06	4.31603e+06	1.37454	0.020526	1.21548	0.281531	insig
MW0145298	C28H44N8O10	Arg-Asp-Leu-Tyr-Ser	Amino acid and Its metabolites	Small Peptide	MS2-Search-DB	0.8249	-	3.06579e+06	2.83396e+06	2.58401e+06	3.34622e+06	3.53394e+06	3.44453e+06	2.14977e+06	3.06491e+06	3.17946e+06	1.8577e+06	3.13294e+06	3.06367e+06	3.42477e+06	3.74519e+06	3.35259e+06	3.0151e+06	2.36038e+06	3.98002e+06	3.38654e+06	3.11691e+06	3.60683e+06	3.56173e+06	3.32252e+06	3.81822e+06	3.27396e+06	1.2102	0.0477422	1.15074	0.202567	insig
MW0105632	C41H60N4O8	Antanapeptin A	Benzene and substituted derivatives	Benzene and substituted derivatives	MS2-Search-DB	0.7037	-	3.81715e+06	3.39983e+06	3.17294e+06	4.1786e+06	4.38062e+06	4.27042e+06	2.51976e+06	3.91892e+06	4.3281e+06	2.2052e+06	3.71715e+06	3.72634e+06	4.18785e+06	5.08758e+06	4.47501e+06	3.45145e+06	2.17336e+06	5.51174e+06	4.27434e+06	4.2506e+06	4.58879e+06	4.48638e+06	4.25662e+06	5.27895e+06	4.09536e+06	0.985117	0.0688889	1.17084	0.227539	insig
MW0144790	C16H27N5O8	Ala-Val-Asn-Asp	Amino acid and Its metabolites	Small Peptide	MS2-Search-DB	0.6841	-	158935	41875.3	13613.6	128547	313683	494258	56584.7	162385	83997.5	232534	281610	505446	872345	356965	868181	606832	166456	300388	109175	377443	1.15359e+06	285613	61450.4	14576.7	80476.3	0.994924	0.0280339	2.38793	1.25576	insig
MW0144755	C22H35N5O7	Ala-Thr-Tyr-Lys	Amino acid and Its metabolites	Small Peptide	MS2-Search-DB	0.689	-	3.42062e+06	3.0188e+06	2.74391e+06	3.66883e+06	3.86032e+06	3.62483e+06	2.01937e+06	3.0345e+06	3.54233e+06	1.91693e+06	2.99417e+06	3.10029e+06	2.8158e+06	4.05181e+06	4.50771e+06	2.98576e+06	8.89565e+06	4.37866e+06	3.19755e+06	3.04602e+06	3.58667e+06	3.82659e+06	3.78314e+06	4.2428e+06	3.28637e+06	1.02213	0.0736503	1.26846	0.343083	insig
MW0144704	C11H19N3O4	Ala-Pro-Ala	Amino acid and Its metabolites	Small Peptide	MS2-Search-DB	0.8643	-	215438	190552	191071	171975	187197	168567	169116	182352	149920	183287	189867	120590	172847	148428	119993	141526	146322	121397	139980	133944	147018	138350	159261	110843	135708	1.9322	4.63727e-05	0.783312	-0.352342	insig
MW0105512	C14H26N6O6	Ala-Glu-Arg	Amino acid and Its metabolites	Small Peptide	MS2-Search-DB	0.688	-	138131	54941.9	10476.3	132719	130418	47621.6	61138.7	355066	141252	179395	309989	163973	203193	437680	409980	228771	114549	275394	44209.4	279112	228012	176878	96835.7	24910.3	157763	0.978332	0.0639304	1.67911	0.747695	insig
MW0144545	C28H44N6O7S	Ala-Gln-Phe-Ile-Met	Amino acid and Its metabolites	Small Peptide	MS2-Search-DB	0.8805	-	3.32074e+06	3.00605e+06	2.70168e+06	3.63687e+06	3.84781e+06	3.69619e+06	2.1921e+06	3.22578e+06	3.41441e+06	1.92384e+06	3.21831e+06	3.1345e+06	3.55231e+06	4.08394e+06	3.59176e+06	3.16182e+06	2.52622e+06	4.37471e+06	3.60967e+06	3.24776e+06	3.87311e+06	3.75017e+06	3.54609e+06	4.23614e+06	3.47751e+06	1.13253	0.0705186	1.14932	0.200785	insig
MW0105428	C2H5O5P	Acetylphosphate	Organic acid And Its derivatives	Organic acid And Its derivatives	MS2-MetDNA	0.5762	-	316420	294144	149115	213038	282533	133471	142322	144677	173752	148168	92894.4	338866	109836	248750	305189	197764	153369	112295	201380	300056	137808	167272	171251	188544	226041	0.136528	0.920529	0.984933	-0.0219021	insig
MW0144429	C26H39N5	AGELASINE	Heterocyclic compounds	Heterocyclic compounds	MS2-Search-DB	0.6984	-	304091	288810	271234	298054	338329	299795	286498	321269	286673	356568	287016	329847	328607	311381	290683	259469	306367	300364	270226	318131	328177	284216	314025	275211	290000	0.270519	0.589407	0.981808	-0.0264865	insig
MW0112973	C9H11N3O2	4-(Nitrosoamino)-1-(3-pyridinyl)-1-butanone	Aldehyde,Ketones,Esters	Ketones	MS2-Insilico	0.5836	-	117629	126390	112200	105230	117478	118418	112350	114657	127626	129647	106695	124950	108283	117686	109539	109559	125972	117441	111472	116399	116200	120017	118159	108787	111141	0.679741	0.266087	0.971713	-0.0413983	insig
MW0143190	C30H46	4,4'-Diapophytofluene	Others	Hydrocarbon derivatives	MS2-Insilico	0.6664	-	409757	453313	445490	421999	430269	555995	586198	554702	515756	466521	491764	518491	706178	629153	496843	481619	635594	573964	493022	566386	479556	357176	347332	372015	383976	0.238619	0.601101	1.03761	0.0532681	insig
MW0127315	C6H8S2	3-Vinyl-1,2-dithiacyclohex-5-ene	Heterocyclic compounds	Heterocyclic compounds	MS2-Search-DB	0.6045	-	1.48797e+07	1.81493e+06	1.27028e+07	1.74912e+06	5.26067e+06	2.71915e+06	2.52637e+06	1.31075e+07	1.48141e+06	1.49931e+07	2.61431e+06	1.813e+06	4.1028e+06	1.21671e+07	2.16408e+06	1.88099e+06	4.78241e+06	2.23789e+06	2.81649e+06	1.94484e+06	1.61433e+07	1.46258e+07	4.96905e+06	254528	1.92903e+06	0.502277	0.359934	0.696717	-0.521356	insig
MW0112914	C3H4O3	3-Oxopropanoic acid	Organic acid And Its derivatives	Organic acid And Its derivatives	MS2-MetDNA	0.9668	-	104484	80066.2	77716.5	80933.7	75840.9	102986	94807.4	83785	97005.9	47225.8	89169.4	93780.9	103732	95841.8	88976.7	106123	91149	82391.5	122970	45916.6	118760	137392	93917.2	104839	114727	0.84639	0.0640568	1.1755	0.233278	insig
MW0014098	C30H48O3	3-Hydroxylanosta-7,24-dien-21-oic acid	Organic acid And Its derivatives	Organic acid And Its derivatives	MS2-Search-DB	0.6714	-	1.50416e+06	1.50706e+06	1.39868e+06	1.52304e+06	1.68745e+06	1.55277e+06	1.47211e+06	1.64087e+06	1.53091e+06	1.73164e+06	1.54333e+06	1.62689e+06	1.67931e+06	1.65934e+06	1.50388e+06	1.34688e+06	1.59101e+06	1.47892e+06	1.41791e+06	1.56704e+06	1.65724e+06	1.51816e+06	1.695e+06	1.44286e+06	1.52334e+06	0.0220911	0.909859	0.996915	-0.00445781	insig
MW0142592	C28H38O6	3-HYDROXYDEOXODIHYDRODEOXYGEDUNIN	Others	Others	MS2-Search-DB	0.6318	-	238436	389882	243278	227158	223354	226745	357646	207731	337241	277180	227618	174940	205094	201195	165936	192323	198608	149030	168143	189406	177245	166862	177948	116443	157740	2.03131	0.00108679	0.651978	-0.617105	insig
MW0119496	C9H13N	3-Butylpyridine	Heterocyclic compounds	Heterocyclic compounds	MS2-Insilico	0.8288	-	787196	613876	573755	351312	586024	549528	645353	551299	657452	645888	684237	551679	617358	367780	351304	710521	641424	598859	545300	635748	716232	597923	375718	589194	566995	0.31831	0.579316	0.956136	-0.0647116	insig
MW0131107	C42H30O10	3-(3,4-dihydroxyphenyl)-11,19-bis(4-hydroxyphenyl)-4,12,20-trioxaheptacyclo[16.6.1.1(2),.1(1),(1)(3).0(2)(1),(2).0,(2).0(1),(2)]heptacosa-1(25),5,7,9(27),13,15,17(26),21,23-nonaene-7,15,23-triol	Alcohol and amines	Alcohols	MS2-Insilico	0.7998	-	501554	716622	251897	504134	568868	733782	389834	453245	562435	351241	564563	584834	617465	948606	700597	544281	713025	740362	687819	699981	728794	690931	982259	798390	876716	1.75985	0.00145632	1.4408	0.526867	insig
MW0118988	C9H13N	3-(2-Methylpropyl)pyridine	Heterocyclic compounds	Heterocyclic compounds	MS2-Insilico	0.7764	-	95319.7	81415.1	52075.7	132655	39478.5	35012.9	75379.6	125733	96262.7	192854	313747	230013	350287	118527	270514	148629	118028	133688	297011	62067.3	324283	277970	104536	122878	267420	1.65505	0.000619907	2.25987	1.17624	up
MW0159863	C5H4N4O	3,7-dihydropurin-6-one	Nucleotide And Its metabolites	Nucleotide and Its metabolites	MS2-MetDNA	0.9726	-	109710	148825	100546	106993	88667.1	129771	98917.5	98682.7	95872.8	206586	168437	98638.2	150516	163150	115914	257804	184019	73469.6	218900	93554.4	296155	183829	59510	59215.9	72279.5	0.448626	0.2202	1.23555	0.305152	insig
MW0131558	C33H40O20	3,4,5-trihydroxy-6-({5-hydroxy-4-oxo-2-phenyl-6,8-bis[3,4,5-trihydroxy-6-(hydroxymethyl)oxan-2-yl]-3,4-dihydro-2H-1-benzopyran-7-yl}oxy)oxane-2-carboxylic acid	Organic acid And Its derivatives	Organic acid And Its derivatives	MS2-Insilico	0.5889	-	322614	494459	175122	315169	391618	435588	241261	307762	385306	206392	362516	357973	398649	603616	474709	381420	453312	493865	448875	426476	448601	465728	625374	522388	565086	1.74149	0.00200082	1.43063	0.516649	insig
MW0142146	C42H59NO5	20,21-Diprenylterpendole J	Heterocyclic compounds	Heterocyclic compounds	MS2-Insilico	0.5743	-	87495	48552.3	96003.8	102766	91295.6	21891.9	64158.1	94205.8	248160	71934.2	91074.4	66977.2	113361	165774	126071	66275.7	68607.9	203355	112244	86803.1	55941.7	171002	197528	92002.9	199620	0.860876	0.240175	1.30722	0.386504	insig
MW0164178	C23H48NO7P	2-azaniumylethyl [(2R)-2-hydroxy-3-octadecanoyloxypropyl] phosphate	Others	Others	MS2-MetDNA	0.8909	-	44004.9	40559.7	18064.8	24048.8	21805.1	42591.6	37431.5	62007.5	46513.2	14267.7	44597.3	47229.3	43675.2	33936	52682.4	60252.7	63539.3	86357.8	40101.8	54033.5	47824.7	44240.3	25348.6	43030.7	31003.6	1.2034	0.0507763	1.3623	0.446044	insig
MW0013590	C10H20O2	2-Methylpropyl hexanoate	Organic acid And Its derivatives	Organic acid And Its derivatives	MS2-Insilico	0.6633	-	2.39486e+06	2.55832e+06	2.43211e+06	2.47886e+06	2.50023e+06	2.83745e+06	2.75405e+06	2.83244e+06	2.66846e+06	2.63753e+06	2.87422e+06	2.61029e+06	3.30831e+06	5.68207e+06	2.61906e+06	2.45046e+06	3.24355e+06	2.57544e+06	2.55652e+06	2.81445e+06	2.54023e+06	2.16952e+06	2.3286e+06	2.06374e+06	2.25295e+06	0.386257	0.406682	1.07532	0.10476	insig
MW0117478	C9H13N	2-(2-Methylpropyl)pyridine	Heterocyclic compounds	Pyridine and pyridine derivatives	MS2-Insilico	0.8254	-	2.33378e+06	728354	5.88147e+06	2.24121e+06	586979	2.27526e+06	704684	2.80248e+06	651478	2.99982e+06	2.02803e+06	983833	648578	5.64151e+06	621039	568622	317473	1.10161e+06	3.05975e+06	2.06612e+06	636668	548940	2.20566e+06	2.23495e+06	1.78277e+06	0.497993	0.444751	0.768528	-0.37983	insig
MW0168471	C10H6N4O2	2-(1h-1,2,4-triazol-5-yl)-1h-isoindole-1,3(2h)-dione	Heterocyclic compounds	Indole and Its derivatives	MS2-Search-DB	0.703	-	2.52394e+06	2.48996e+06	2.41908e+06	2.42882e+06	2.39222e+06	2.44631e+06	2.35061e+06	2.22884e+06	2.17814e+06	2.42399e+06	2.3823e+06	2.08262e+06	2.22942e+06	2.04107e+06	1.92871e+06	1.88755e+06	1.91821e+06	1.68473e+06	1.65549e+06	1.88079e+06	1.91051e+06	1.69249e+06	1.80486e+06	1.62198e+06	1.69715e+06	2.18255	2.06992e-07	0.793288	-0.334083	insig
MW0168474	C7H5NO4	2,3-PYRIDINEDICARBOXYLIC ACID	Heterocyclic compounds	Pyridine and pyridine derivatives	MS2-Search-DB	0.647	-	118273	135826	108910	112217	104229	146112	95606.2	119951	145110	89283.5	167365	114062	193384	157989	105173	164489	131370	104703	130791	93531.9	119612	104759	131471	129135	142763	0.813396	0.126161	1.12892	0.174942	insig
MW0012846	C26H50NO7P	1-Linoleoyl-sn-glycero-3-phosphorylcholine	GP	PC	MS2-Search-DB	0.752	-	13417.4	21234.9	6121.48	14982.5	13748	14595.3	25349.4	16096	19371.1	5240.47	79678.7	15181.8	28502.4	63716.5	14686	110625	12345.5	61279.3	12422.4	227023	28287.1	31991.5	111485	121637	23021.2	1.65776	0.00800692	4.18178	2.06412	up
MW0141767	C8H13NO	1-Indolizidinone	Aldehyde,Ketones,Esters	Ketones	MS2-MetDNA	0.5747	-	133708	131062	119433	121606	93717.8	104665	126255	90802	125871	93480.1	143134	112518	121295	141849	230868	279458	128963	233959	133162	105916	112126	120697	105247	126498	110052	1.03094	0.0419823	1.28923	0.366509	insig
MW0141756	C5H12O8P2	1-Hydroxy-2-methyl-2-butenyl 4-diphosphate	Organic acid And Its derivatives	Phosphoric acids	MS2-MetDNA	0.5216	-	334598	424689	307264	400493	379455	410222	336623	342281	370239	292166	294232	345419	426648	462682	333526	334819	304543	360868	319883	431820	431292	373217	449721	281853	336936	0.257825	0.775362	1.01675	0.0239688	insig
MW0116280	C12H17NO2	1-(2,3-Dihydro-6,7-dimethyl-1H-pyrrolizin-5-yl)-2-hydroxy-1-propanone	Aldehyde,Ketones,Esters	Ketones	MS2-Insilico	0.5785	-	3.78629e+06	3.39199e+06	3.45476e+06	4.20069e+06	4.25902e+06	3.67783e+06	2.29508e+06	3.45937e+06	4.49246e+06	2.32538e+06	3.23589e+06	3.39307e+06	3.42411e+06	4.44376e+06	4.9477e+06	3.36013e+06	1.0445e+07	5.0447e+06	3.78151e+06	3.77338e+06	4.07716e+06	4.15965e+06	4.83626e+06	4.65265e+06	4.01499e+06	1.05237	0.0707031	1.27494	0.350428	insig
MW0011791	C46H84NO7P	1-(1Z-Octadecenyl)-2-(5Z,8Z,11Z,14Z-eicosatetraenoyl)-sn-glycero-3-phosphocholine	GP	PC	MS2-Search-DB	0.7778	-	1025.98	2404.2	488901	524313	471556	328823	627927	247480	97965.2	26477.9	19971.9	15646.4	18366.3	50607	105694	57273.5	39404	21592	34214.2	42577.1	238224	241388	115156	61098.6	42740.8	0.422772	0.0234819	0.261272	-1.93638	insig
MW0011790	C48H84NO7P	1-(1Z-Octadecenyl)-2-(4Z,7Z,10Z,13Z,16Z,19Z-docosahexaenoyl)-sn-glycero-3-phosphocholine	GP	PC	MS2-Search-DB	0.7882	-	751234	4.54696e+06	622852	255318	761544	367196	177895	148141	89411.7	99125.8	143270	527130	107899	837482	128469	129642	175931	236064	213376	743180	274361	236490	257917	179661	205886	0.627333	0.284314	0.374845	-1.41563	insig
MW0116650	C28H38O7	1,3-Dideacetyldeoxykhivorin	Heterocyclic compounds	Heterocyclic compounds	MS2-Search-DB	0.7467	-	39773.6	29321.5	30417.5	27207.3	25713.8	40884.8	36902.4	36996.1	41764.7	36903.6	36803.9	44141.4	40949.7	39931.1	54556	71436.4	46918.3	50435.2	44623.1	37973.7	45425.1	44782.5	39176.1	43835	51282.9	1.77405	0.000585904	1.3343	0.416079	insig
MW0116581	C2H4S3	1,2,4-Trithiolane	Heterocyclic compounds	Heterocyclic compounds	MS2-Insilico	0.659	-	500349	234623	800810	1.51691e+06	354723	1.41411e+06	256190	1.31332e+06	1.37678e+06	1.52118e+06	280869	231169	721802	1.37075e+06	708846	563649	671541	1.25662e+06	1.34572e+06	534971	194420	515112	324754	161944	222832	0.723427	0.136638	0.653461	-0.613826	insig
MW0111670	C3H4Br2O	1,1-Dibromo-2-propanone	Aldehyde,Ketones,Esters	Ketones	MS2-Insilico	0.6988	-	361303	360553	348970	341820	341127	302278	362011	360681	355691	338118	335668	374741	321380	367493	343748	409183	362387	379570	333508	350448	375638	379385	370662	355781	361427	0.888349	0.0971933	1.04074	0.0576048	insig
MW0147818	C21H23D11O2	-CP 47,497-d11	Heterocyclic compounds	Heterocyclic compounds	MS2-Search-DB	0.7392	-	112353	94002.6	111730	93500.5	87906.5	449863	91541.2	142038	168780	112488	89604.9	185901	298702	105946	159984	127628	167058	129156	110601	619717	111116	78366.4	98045	140491	164261	0.454355	0.601689	1.1777	0.235967	insig
MW0140724	C26H51NO4S	(Z)-2-tetracos-15-enamidoethanesulfonic acid	Others	Others	MS2-Search-DB	0.7035	-	5.52915e+06	4.17031e+06	5.87635e+06	5.53871e+06	5.49724e+06	7.54409e+06	6.19893e+06	4.40424e+06	5.93875e+06	4.73869e+06	5.2105e+06	7.31576e+06	7.02517e+06	5.30316e+06	7.14888e+06	6.86877e+06	7.11159e+06	8.29723e+06	6.80698e+06	6.74425e+06	7.05969e+06	5.63015e+06	4.45361e+06	5.2053e+06	5.55734e+06	1.05007	0.0554595	1.15133	0.2033	insig
MW0140553	C10H9NO2	(Indol-3-yl)glycolaldehyde	Heterocyclic compounds	Indole and Its derivatives	MS2-MetDNA	0.5946	-	94871.9	109750	118872	124370	135985	126256	224011	123489	116173	135836	132282	195978	151411	224487	103722	110677	211163	192496	113285	125359	119201	117956	160645	95809	218694	0.601039	0.214098	1.15717	0.210597	insig
MW0140518	C18H36O	(E) 9-octadecen-1-ol	Others	Others	MS2-Search-DB	0.6017	-	5230.5	11197.9	8574.22	6213.85	6143.92	6242.55	8334.4	10248.5	14677.2	10801.1	6035.56	16865.5	5281.14	6364.91	13708	11194.1	14533.6	9868.03	9893.48	13569.9	6599.9	11245.8	7850.04	18058.4	13709.5	0.685336	0.128164	1.2531	0.325501	insig
MW0115921	C23H25N3O3S	(4,5-Bis(4-methoxyphenyl)thiazol-2-yl)(4-methylpiperazin-1-yl)methanone hydrochloride	Others	Others	MS2-Search-DB	0.7169	-	139587	135395	131347	141667	143264	148917	127924	131659	131218	138935	135099	107732	132183	134625	107609	102924	119125	103948	105944	115547	114983	109645	117492	95462	101614	1.99736	3.29449e-06	0.829218	-0.270177	insig
MW0011150	C45H74O15	(3b,21b)-12-Oleanene-3,21,28-triol 28-[arabinosyl-(1->3)-arabinosyl-(1->3)-arabinoside]	Terpenoids	Terpene	MS2-Insilico	0.5866	-	995182	794782	569031	904163	994899	1.05098e+06	476779	938731	996518	378153	739487	765007	845822	1.28403e+06	1.27317e+06	829793	1.62173e+06	1.61867e+06	1.07064e+06	1.05145e+06	1.05975e+06	1.18751e+06	1.23609e+06	1.76673e+06	1.04909e+06	1.46725	0.00514447	1.43215	0.518186	insig
MW0127810	C51H79NO14	(1R,16Z,27Z,29Z)-1,18-dihydroxy-12-[1-(4-hydroxy-3-methoxycyclohexyl)propan-2-yl]-19,31-dimethoxy-15,17,21,23,30,36-hexamethyl-11,25,37-trioxa-4-azatetracyclo[31.3.1.0(2),(2)]heptatriaconta-16,27,29-triene-2,3,10,14,20-pentone	Others	Others	MS2-Insilico	0.7239	-	1.5974e+06	1.312e+06	1.10356e+06	1.66746e+06	1.65237e+06	1.81907e+06	815960	1.56434e+06	1.80277e+06	727842	1.39413e+06	1.3978e+06	1.60447e+06	2.06499e+06	1.91182e+06	1.32835e+06	1.63192e+06	2.49156e+06	1.78789e+06	1.79149e+06	1.86816e+06	1.87042e+06	2.02319e+06	2.62374e+06	1.66888e+06	1.40442	0.0149477	1.30173	0.380425	insig
MW0010770	C23H32ClNO5	(+)-Cloprostenol methylamide	Hormones and hormone related compounds	Hormones and hormone related compounds	MS2-Search-DB	0.7495	-	577477	643785	835288	525109	642202	610566	653318	689202	644302	738739	750118	675212	891790	693361	737803	468822	871662	582222	639657	659282	645698	665303	661939	622862	566508	0.229686	0.621343	1.0297	0.0422253	insig
