# Supplementary material for: Linoleic acid promotes TF expression through PPAR-α, which leads to tumor progression in primary pulmonary lymphoepithelioma-like carcinoma
Source: Research Square preprint supplement (doi:10.21203/rs.3.rs-5704972/v1), 2025-01-10
Supplement: Supplementary file 3 [file 1d516e82df81de218851c215.docx]

Supplementary Table 2. Primer sequences

| Gene | Primer sequences |
| --- | --- |
| PPAR-α | F: 5′-TGAACAAAGACGGGATG - 3′  R: 5′-TCAAACTTGGGTTCCATGAT - 3′ |
| PPAR-γ | F: 5′-TGAATCCAGAGTCCGCTGACCTC-3′  R: 5′-ATCGCCCTCGCCTTTGCTTTG-3′ |
| NF-κB | F: 5′-ATGTGGAGATCATTGAGCAGC-3′  R: 5′-CCTGGTCCTGTGTAGCCATT-3′ |
| SREBP-1 | F: 5′-GTCTCAGTCCCCTGGTCTCT-3′  R: 5′-TTGATAGGCAGCTTCTCCGC-3′ |
| Erg-1 | F:5′-CGCACAGTGCAGAAAAACG-3′  R: 5′-TGTCTGTTCGGACAACTTCCTT-3′ |
| GAPDH | F: 5′-AGGTCGGTGTGAACGGATTTG-3′  R: 5′-GGGGTCGTTGATGGCAACA-3′ |
