# Supplementary material for: Linoleic acid promotes TF expression through PPAR-α, which leads to tumor progression in primary pulmonary lymphoepithelioma-like carcinoma
Source: Research Square preprint supplement (doi:10.21203/rs.3.rs-5704972/v1), 2025-01-10
Supplement: Supplementary file 4 [file 2a7446478485b1ac81f97045.xlsx]

## Sheet: Pathway enrichment
Supplementary Table 6.Pathway enrichment of the pLELC and CON group.
#Term	ID	Input number	Background number	Input	P-Value	All	Diff	p-adjust	Hyperlink
Ferroptosis - Homo sapiens (human)	hsa04216	2	2	P02787;P00450	0.00361958	258	16	0.0542937	http://www.genome.jp/kegg-bin/show_pathway?map=hsa04216&multi_query=hsa:7018+red,green%0d%0ahsa:1356+blue,green%0d%0a
HIF-1 signaling pathway - Homo sapiens (human)	hsa04066	1	1	P02787	0.0620155	258	16	0.186047	http://www.genome.jp/kegg-bin/show_pathway?map=hsa04066&multi_query=hsa:7018+red,green%0d%0a
Biotin metabolism - Homo sapiens (human)	hsa00780	1	1	P43251	0.0620155	258	16	0.186047	http://www.genome.jp/kegg-bin/show_pathway?map=hsa00780&multi_query=hsa:686+red,green%0d%0a
Porphyrin metabolism - Homo sapiens (human)	hsa00860	1	1	P00450	0.0620155	258	16	0.186047	http://www.genome.jp/kegg-bin/show_pathway?map=hsa00860&multi_query=hsa:1356+blue,green%0d%0a
Mineral absorption - Homo sapiens (human)	hsa04978	1	1	P02787	0.0620155	258	16	0.186047	http://www.genome.jp/kegg-bin/show_pathway?map=hsa04978&multi_query=hsa:7018+red,green%0d%0a
Fluid shear stress and atherosclerosis - Homo sapiens (human)	hsa05418	1	2	P33151	0.120411	258	16	0.225771	http://www.genome.jp/kegg-bin/show_pathway?map=hsa05418&multi_query=hsa:1003+red,green%0d%0a
Leukocyte transendothelial migration - Homo sapiens (human)	hsa04670	1	2	P33151	0.120411	258	16	0.225771	http://www.genome.jp/kegg-bin/show_pathway?map=hsa04670&multi_query=hsa:1003+red,green%0d%0a
Cell adhesion molecules - Homo sapiens (human)	hsa04514	1	2	P33151	0.120411	258	16	0.225771	http://www.genome.jp/kegg-bin/show_pathway?map=hsa04514&multi_query=hsa:1003+red,green%0d%0a
Vitamin digestion and absorption - Homo sapiens (human)	hsa04977	1	4	P43251	0.227126	258	16	0.378544	http://www.genome.jp/kegg-bin/show_pathway?map=hsa04977&multi_query=hsa:686+red,green%0d%0a
Metabolic pathways - Homo sapiens (human)	hsa01100	1	7	P43251	0.364682	258	16	0.547023	http://www.genome.jp/kegg-bin/show_pathway?hsa01100+hsa:686
Prion disease - Homo sapiens (human)	hsa05020	1	10	P02748	0.479024	258	16	0.653215	http://www.genome.jp/kegg-bin/show_pathway?map=hsa05020&multi_query=hsa:735+blue,green%0d%0a
Complement and coagulation cascades - Homo sapiens (human)	hsa04610	2	51	P02748;P05154	0.862709	258	16	0.979482	http://www.genome.jp/kegg-bin/show_pathway?map=hsa04610&multi_query=hsa:5104+red,green%0d%0ahsa:735+blue,green%0d%0a
Amoebiasis - Homo sapiens (human)	hsa05146	1	33	P02748	0.895759	258	16	0.979482	http://www.genome.jp/kegg-bin/show_pathway?map=hsa05146&multi_query=hsa:735+blue,green%0d%0a
Systemic lupus erythematosus - Homo sapiens (human)	hsa05322	1	45	P02748	0.957976	258	16	0.979482	http://www.genome.jp/kegg-bin/show_pathway?map=hsa05322&multi_query=hsa:735+blue,green%0d%0a
Coronavirus disease - COVID-19 - Homo sapiens (human)	hsa05171	1	54	P02748	0.979482	258	16	0.979482	http://www.genome.jp/kegg-bin/show_pathway?map=hsa05171&multi_query=hsa:735+blue,green%0d%0a
