# Supplementary material for: Linoleic acid promotes TF expression through PPAR-α, which leads to tumor progression in primary pulmonary lymphoepithelioma-like carcinoma
Source: Research Square preprint supplement (doi:10.21203/rs.3.rs-5704972/v1), 2025-01-10
Supplement: Supplementary file 5 [file 365dc1e9e1d4de90f06e39cf.xlsx]

## Sheet: GO annotation
Supplementary Table 5.GO annotation and secondary classification of GO between the pLELC and CON group.
Protein ID	Symbol	GO_ID	GO term	DB:Reference	Evidence Code	Aspect	Taxon and Interacting taxon	Date
P02787	TF	GO:0005576	extracellular region	Reactome:R-HSA-8868648	TAS	cellular_component	taxon:9606	20150505
P02787	TF	GO:0005576	extracellular region	PMID:9990067	IDA	cellular_component	taxon:9606	20150710
P02787	TF	GO:0005576	extracellular region	Reactome:R-HSA-8868651	TAS	cellular_component	taxon:9606	20150505
P02787	TF	GO:0006879	cellular iron ion homeostasis	GO_REF:0000002	IEA	biological_process	taxon:9606	20220419
P02787	TF	GO:0005768	endosome	GO_REF:0000107	IEA	cellular_component	taxon:9606	20220419
P02787	TF	GO:0005515	protein binding	PMID:16271884	IPI	molecular_function	taxon:9606	20220423
P02787	TF	GO:0070062	extracellular exosome	PMID:23533145	HDA	cellular_component	taxon:9606	20140714
P02787	TF	GO:0005576	extracellular region	Reactome:R-HSA-8867754	TAS	cellular_component	taxon:9606	20150505
P02787	TF	GO:0030669	clathrin-coated endocytic vesicle membrane	Reactome:R-HSA-8868661	TAS	cellular_component	taxon:9606	20190205
P02787	TF	GO:0005886	plasma membrane	PMID:21873635	IBA	cellular_component	taxon:9606	20200710
P02787	TF	GO:0030669	clathrin-coated endocytic vesicle membrane	Reactome:R-HSA-8869438	TAS	cellular_component	taxon:9606	20190205
P02787	TF	GO:0055037	recycling endosome	PMID:21873635	IBA	cellular_component	taxon:9606	20200710
P02787	TF	GO:0005576	extracellular region	GO_REF:0000044	IEA	cellular_component	taxon:9606	20220419
P02787	TF	GO:0005769	early endosome	GO_REF:0000107	IEA	cellular_component	taxon:9606	20220419
P02787	TF	GO:0005515	protein binding	PMID:14691533	IPI	molecular_function	taxon:9606	20220423
P02787	TF	GO:0005576	extracellular region	Reactome:R-HSA-917807	TAS	cellular_component	taxon:9606	20150505
P02787	TF	GO:0005770	late endosome	PMID:15880641	IDA	cellular_component	taxon:9606	20090721
P02787	TF	GO:0005576	extracellular region	Reactome:R-HSA-917888	TAS	cellular_component	taxon:9606	20150505
P02787	TF	GO:0034756	regulation of iron ion transport	PMID:18353247	IGI	biological_process	taxon:9606	20180206
P02787	TF	GO:0005576	extracellular region	Reactome:R-HSA-917814	TAS	cellular_component	taxon:9606	20150505
P02787	TF	GO:0005576	extracellular region	PMID:14718574	NAS	cellular_component	taxon:9606	20040422
P02787	TF	GO:0005576	extracellular region	Reactome:R-HSA-8868072	TAS	cellular_component	taxon:9606	20150505
P02787	TF	GO:0005515	protein binding	PMID:22327295	IPI	molecular_function	taxon:9606	20220423
P02787	TF	GO:0005576	extracellular region	Reactome:R-HSA-8868071	TAS	cellular_component	taxon:9606	20150505
P02787	TF	GO:0030669	clathrin-coated endocytic vesicle membrane	Reactome:R-HSA-8871193	TAS	cellular_component	taxon:9606	20190205
P02787	TF	GO:0030669	clathrin-coated endocytic vesicle membrane	Reactome:R-HSA-8871194	TAS	cellular_component	taxon:9606	20190205
P02787	TF	GO:0060395	SMAD protein signal transduction	GO_REF:0000107	IEA	biological_process	taxon:9606	20220419
P02787	TF	GO:0030669	clathrin-coated endocytic vesicle membrane	Reactome:R-HSA-8868659	TAS	cellular_component	taxon:9606	20190205
P02787	TF	GO:0005576	extracellular region	Reactome:R-HSA-482770	TAS	cellular_component	taxon:9606	20150505
P02787	TF	GO:0005905	clathrin-coated pit	PMID:12857860	IDA	cellular_component	taxon:9606	20061009
P02787	TF	GO:0070062	extracellular exosome	PMID:19056867	HDA	cellular_component	taxon:9606	20131024
P02787	TF	GO:0005615	extracellular space	PMID:16502470	HDA	cellular_component	taxon:9606	20140603
P02787	TF	GO:0006826	iron ion transport	GO_REF:0000002	IEA	biological_process	taxon:9606	20220419
P02787	TF	GO:0030139	endocytic vesicle	PMID:15292400	IDA	cellular_component	taxon:9606	20041029
P02787	TF	GO:1990459	transferrin receptor binding	PMID:9465039	TAS	molecular_function	taxon:9606	20150604
P02787	TF	GO:0005615	extracellular space	PMID:22664934	HDA	cellular_component	taxon:9606	20131220
P02787	TF	GO:0005905	clathrin-coated pit	GO_REF:0000107	IEA	cellular_component	taxon:9606	20220419
P02787	TF	GO:0005576	extracellular region	Reactome:R-HSA-917839	TAS	cellular_component	taxon:9606	20150505
P02787	TF	GO:0034774	secretory granule lumen	Reactome:R-HSA-482770	TAS	cellular_component	taxon:9606	20130528
P02787	TF	GO:0016324	apical plasma membrane	PMID:11208127	IDA	cellular_component	taxon:9606	20061103
P02787	TF	GO:0005576	extracellular region	Reactome:R-HSA-8866277	TAS	cellular_component	taxon:9606	20150505
P02787	TF	GO:1990459	transferrin receptor binding	PMID:18353247	IPI	molecular_function	taxon:9606	20150816
P02787	TF	GO:0005576	extracellular region	Reactome:R-HSA-8867756	TAS	cellular_component	taxon:9606	20150505
P02787	TF	GO:0010008	endosome membrane	Reactome:R-HSA-917814	TAS	cellular_component	taxon:9606	20150505
P02787	TF	GO:0030669	clathrin-coated endocytic vesicle membrane	Reactome:R-HSA-8868660	TAS	cellular_component	taxon:9606	20190205
P02787	TF	GO:1990459	transferrin receptor binding	PMID:29388418	IPI	molecular_function	taxon:9606	20191122
P02787	TF	GO:0009925	basal plasma membrane	PMID:15880641	IDA	cellular_component	taxon:9606	20090721
P02787	TF	GO:0070371	ERK1 and ERK2 cascade	GO_REF:0000107	IEA	biological_process	taxon:9606	20220419
P02787	TF	GO:0005515	protein binding	PMID:22343719	IPI	molecular_function	taxon:9606	20220423
P02787	TF	GO:0006826	iron ion transport	PMID:21873635	IBA	biological_process	taxon:9606	20200710
P02787	TF	GO:0005788	endoplasmic reticulum lumen	Reactome:R-HSA-8952289	TAS	cellular_component	taxon:9606	20170124
P02787	TF	GO:0005576	extracellular region	GO_REF:0000002	IEA	cellular_component	taxon:9606	20220419
P02787	TF	GO:0055037	recycling endosome	PMID:15880641	IDA	cellular_component	taxon:9606	20090721
P02787	TF	GO:2000147	positive regulation of cell motility	GO_REF:0000107	IEA	biological_process	taxon:9606	20220419
P02787	TF	GO:0030139	endocytic vesicle	PMID:15229288	IDA	cellular_component	taxon:9606	20060324
P02787	TF	GO:0031647	regulation of protein stability	PMID:25635054	TAS	biological_process	taxon:9606	20150612
P02787	TF	GO:0045780	positive regulation of bone resorption	GO_REF:0000107	IEA	biological_process	taxon:9606	20220419
P02787	TF	GO:0005576	extracellular region	Reactome:R-HSA-8868236	TAS	cellular_component	taxon:9606	20150505
P02787	TF	GO:0005515	protein binding	PMID:19664057	IPI	molecular_function	taxon:9606	20220423
P02787	TF	GO:0005515	protein binding	PMID:16354665	IPI	molecular_function	taxon:9606	20220423
P02787	TF	GO:0030139	endocytic vesicle	GO_REF:0000107	IEA	cellular_component	taxon:9606	20220419
P02787	TF	GO:0048260	positive regulation of receptor-mediated endocytosis	PMID:12704209	IDA	biological_process	taxon:9606	20150710
P02787	TF	GO:0005615	extracellular space	GO_REF:0000002	IEA	cellular_component	taxon:9606	20220419
P02787	TF	GO:0006811	ion transport	GO_REF:0000043	IEA	biological_process	taxon:9606	20220419
P02787	TF	GO:0030669	clathrin-coated endocytic vesicle membrane	Reactome:R-HSA-8868658	TAS	cellular_component	taxon:9606	20190205
P02787	TF	GO:0005515	protein binding	PMID:21788477	IPI	molecular_function	taxon:9606	20220423
P02787	TF	GO:0009986	cell surface	PMID:16195351	IDA	cellular_component	taxon:9606	20130726
P02787	TF	GO:0071281	cellular response to iron ion	PMID:18353247	IGI	biological_process	taxon:9606	20150702
P02787	TF	GO:0016020	membrane	GO_REF:0000107	IEA	cellular_component	taxon:9606	20220419
P02787	TF	GO:0006826	iron ion transport	GO_REF:0000107	IEA	biological_process	taxon:9606	20220419
P02787	TF	GO:0048471	perinuclear region of cytoplasm	PMID:20202662	IDA	cellular_component	taxon:9606	20111022
P02787	TF	GO:0005615	extracellular space	PMID:23580065	HDA	cellular_component	taxon:9606	20131220
P02787	TF	GO:0001895	retina homeostasis	PMID:23580065	HEP	biological_process	taxon:9606	20140103
P02787	TF	GO:1990459	transferrin receptor binding	PMID:9546397	IPI	molecular_function	taxon:9606	20150604
P02787	TF	GO:1990459	transferrin receptor binding	PMID:18353247	IPI	molecular_function	taxon:9606	20150702
P02787	TF	GO:0031410	cytoplasmic vesicle	PMID:12857860	IDA	cellular_component	taxon:9606	20061009
P02787	TF	GO:0031232	extrinsic component of external side of plasma membrane	PMID:18353247	IGI	cellular_component	taxon:9606	20150702
P02787	TF	GO:0008198	ferrous iron binding	PMID:18353247	IDA	molecular_function	taxon:9606	20150702
P02787	TF	GO:0031982	vesicle	PMID:18353773	IDA	cellular_component	taxon:9606	20140812
P02787	TF	GO:0034986	iron chaperone activity	PMID:18353247	IDA	molecular_function	taxon:9606	20180223
P02787	TF	GO:0030316	osteoclast differentiation	GO_REF:0000107	IEA	biological_process	taxon:9606	20220419
P02787	TF	GO:0005615	extracellular space	PMID:21873635	IBA	cellular_component	taxon:9606	20200710
P02787	TF	GO:0010008	endosome membrane	Reactome:R-HSA-917835	TAS	cellular_component	taxon:9606	20150505
P02787	TF	GO:0005576	extracellular region	Reactome:R-HSA-8868661	TAS	cellular_component	taxon:9606	20150505
P02787	TF	GO:0005576	extracellular region	Reactome:R-HSA-5691150	TAS	cellular_component	taxon:9606	20150505
P02787	TF	GO:0019731	antibacterial humoral response	PMID:21873635	IBA	biological_process	taxon:9606	20200710
P02787	TF	GO:0045893	positive regulation of transcription, DNA-templated	GO_REF:0000107	IEA	biological_process	taxon:9606	20220419
P02787	TF	GO:0005769	early endosome	PMID:15880641	IDA	cellular_component	taxon:9606	20090721
P02787	TF	GO:0046872	metal ion binding	GO_REF:0000043	IEA	molecular_function	taxon:9606	20220419
P02787	TF	GO:0042327	positive regulation of phosphorylation	GO_REF:0000107	IEA	biological_process	taxon:9606	20220419
P02787	TF	GO:0072562	blood microparticle	PMID:22516433	HDA	cellular_component	taxon:9606	20131223
P02787	TF	GO:0005576	extracellular region	Reactome:R-HSA-917987	TAS	cellular_component	taxon:9606	20150505
P02787	TF	GO:0045178	basal part of cell	PMID:15880641	IDA	cellular_component	taxon:9606	20090721
P02787	TF	GO:0005515	protein binding	PMID:20404192	IPI	molecular_function	taxon:9606	20220423
P02787	TF	GO:0005515	protein binding	PMID:15880641	IPI	molecular_function	taxon:9606	20090721
P02787	TF	GO:0048471	perinuclear region of cytoplasm	PMID:15880641	IDA	cellular_component	taxon:9606	20090721
P02787	TF	GO:0055072	iron ion homeostasis	PMID:18353247	IC	biological_process	taxon:9606	20150702
P02787	TF	GO:0005576	extracellular region	GO_REF:0000043	IEA	cellular_component	taxon:9606	20220419
P02787	TF	GO:0055037	recycling endosome	GO_REF:0000107	IEA	cellular_component	taxon:9606	20220419
P02787	TF	GO:1990712	HFE-transferrin receptor complex	PMID:9546397	IDA	cellular_component	taxon:9606	20150604
P02787	TF	GO:0010008	endosome membrane	Reactome:R-HSA-917807	TAS	cellular_component	taxon:9606	20150505
P02787	TF	GO:0005769	early endosome	PMID:21873635	IBA	cellular_component	taxon:9606	20200710
P02787	TF	GO:0007015	actin filament organization	GO_REF:0000107	IEA	biological_process	taxon:9606	20220419
P02787	TF	GO:0005576	extracellular region	Reactome:R-HSA-8868230	TAS	cellular_component	taxon:9606	20150505
P02787	TF	GO:0008199	ferric iron binding	GO_REF:0000002	IEA	molecular_function	taxon:9606	20220419
P02787	TF	GO:0005515	protein binding	PMID:32296183	IPI	molecular_function	taxon:9606	20220423
P02787	TF	GO:0048260	positive regulation of receptor-mediated endocytosis	PMID:18353247	IGI	biological_process	taxon:9606	20150702
P02787	TF	GO:0009617	response to bacterium	GO_REF:0000107	IEA	biological_process	taxon:9606	20220419
P02787	TF	GO:0005515	protein binding	PMID:29302006	IPI	molecular_function	taxon:9606	20220423
P02787	TF	GO:0055072	iron ion homeostasis	GO_REF:0000043	IEA	biological_process	taxon:9606	20220419
P35542	SAA4	GO:0005576	extracellular region	GO_REF:0000043	IEA	cellular_component	taxon:9606	20220419
P35542	SAA4	GO:0034364	high-density lipoprotein particle	GO_REF:0000043	IEA	cellular_component	taxon:9606	20220419
P35542	SAA4	GO:0006953	acute-phase response	GO_REF:0000043	IEA	biological_process	taxon:9606	20220419
P35542	SAA4	GO:0070062	extracellular exosome	PMID:23533145	HDA	cellular_component	taxon:9606	20140714
P35542	SAA4	GO:0005576	extracellular region	PMID:14718574	NAS	cellular_component	taxon:9606	20040422
P35542	SAA4	GO:0005576	extracellular region	GO_REF:0000002	IEA	cellular_component	taxon:9606	20220419
P35542	SAA4	GO:0005576	extracellular region	GO_REF:0000044	IEA	cellular_component	taxon:9606	20220419
P35542	SAA4	GO:0005515	protein binding	PMID:32296183	IPI	molecular_function	taxon:9606	20220423
P19827	ITIH1	GO:0072562	blood microparticle	PMID:22516433	HDA	cellular_component	taxon:9606	20131223
P19827	ITIH1	GO:0005576	extracellular region	PMID:14718574	NAS	cellular_component	taxon:9606	20040416
P19827	ITIH1	GO:0005515	protein binding	PMID:16873769	IPI	molecular_function	taxon:9606	20210819
P19827	ITIH1	GO:0030212	hyaluronan metabolic process	GO_REF:0000002	IEA	biological_process	taxon:9606	20220419
P19827	ITIH1	GO:0005576	extracellular region	GO_REF:0000044	IEA	cellular_component	taxon:9606	20220419
P19827	ITIH1	GO:0010466	negative regulation of peptidase activity	GO_REF:0000043	IEA	biological_process	taxon:9606	20220419
P19827	ITIH1	GO:0004867	serine-type endopeptidase inhibitor activity	GO_REF:0000002	IEA	molecular_function	taxon:9606	20220419
P19827	ITIH1	GO:0005540	hyaluronic acid binding	PMID:20463016	IDA	molecular_function	taxon:9606	20210819
P19827	ITIH1	GO:0005576	extracellular region	GO_REF:0000043	IEA	cellular_component	taxon:9606	20220419
P19827	ITIH1	GO:0062023	collagen-containing extracellular matrix	PMID:28675934	HDA	cellular_component	taxon:9606	20180719
P19827	ITIH1	GO:0004867	serine-type endopeptidase inhibitor activity	GO_REF:0000043	IEA	molecular_function	taxon:9606	20220419
P19827	ITIH1	GO:0062023	collagen-containing extracellular matrix	PMID:25037231	HDA	cellular_component	taxon:9606	20180511
P19827	ITIH1	GO:0030414	peptidase inhibitor activity	GO_REF:0000043	IEA	molecular_function	taxon:9606	20220419
P19827	ITIH1	GO:0005509	calcium ion binding	PMID:2446322	TAS	molecular_function	taxon:9606	20030904
P19827	ITIH1	GO:0005515	protein binding	PMID:20463016	IPI	molecular_function	taxon:9606	20210819
P19827	ITIH1	GO:0010951	negative regulation of endopeptidase activity	GO_REF:0000108	IEA	biological_process	taxon:9606	20220421
P19827	ITIH1	GO:0005515	protein binding	PMID:26468290	IPI	molecular_function	taxon:9606	20210830
P19827	ITIH1	GO:0070062	extracellular exosome	PMID:23533145	HDA	cellular_component	taxon:9606	20140714
P01011	SERPINA3	GO:0019216	regulation of lipid metabolic process	PMID:11835318	NAS	biological_process	taxon:9606	20031216
P01011	SERPINA3	GO:0005576	extracellular region	Reactome:R-HSA-481007	TAS	cellular_component	taxon:9606	20151022
P01011	SERPINA3	GO:0010466	negative regulation of peptidase activity	GO_REF:0000043	IEA	biological_process	taxon:9606	20220419
P01011	SERPINA3	GO:0034774	secretory granule lumen	Reactome:R-HSA-6798748	TAS	cellular_component	taxon:9606	20160715
P01011	SERPINA3	GO:0004867	serine-type endopeptidase inhibitor activity	PMID:21873635	IBA	molecular_function	taxon:9606	20211215
P01011	SERPINA3	GO:0072562	blood microparticle	PMID:22516433	HDA	cellular_component	taxon:9606	20131223
P01011	SERPINA3	GO:0005515	protein binding	PMID:14668352	IPI	molecular_function	taxon:9606	20061205
P01011	SERPINA3	GO:0005576	extracellular region	GO_REF:0000043	IEA	cellular_component	taxon:9606	20220419
P01011	SERPINA3	GO:0005515	protein binding	PMID:12709365	IPI	molecular_function	taxon:9606	20031211
P01011	SERPINA3	GO:0004867	serine-type endopeptidase inhibitor activity	PMID:2404007	TAS	molecular_function	taxon:9606	20090406
P01011	SERPINA3	GO:0030414	peptidase inhibitor activity	GO_REF:0000043	IEA	molecular_function	taxon:9606	20220419
P01011	SERPINA3	GO:0005576	extracellular region	PMID:14718574	NAS	cellular_component	taxon:9606	20040415
P01011	SERPINA3	GO:0005634	nucleus	PMID:14668352	TAS	cellular_component	taxon:9606	20061205
P01011	SERPINA3	GO:0070062	extracellular exosome	PMID:19056867	HDA	cellular_component	taxon:9606	20131024
P01011	SERPINA3	GO:0004867	serine-type endopeptidase inhibitor activity	GO_REF:0000043	IEA	molecular_function	taxon:9606	20220419
P01011	SERPINA3	GO:0035578	azurophil granule lumen	Reactome:R-HSA-6798751	TAS	cellular_component	taxon:9606	20160715
P01011	SERPINA3	GO:0062023	collagen-containing extracellular matrix	PMID:28344315	HDA	cellular_component	taxon:9606	20180727
P01011	SERPINA3	GO:0062023	collagen-containing extracellular matrix	PMID:28675934	HDA	cellular_component	taxon:9606	20180719
P01011	SERPINA3	GO:0005515	protein binding	PMID:14668352	IPI	molecular_function	taxon:9606	20220423
P01011	SERPINA3	GO:0030277	maintenance of gastrointestinal epithelium	PMID:8647626	NAS	biological_process	taxon:9606	20090812
P01011	SERPINA3	GO:0005576	extracellular region	PMID:8647626	NAS	cellular_component	taxon:9606	20090812
P01011	SERPINA3	GO:0006954	inflammatory response	PMID:12475184	NAS	biological_process	taxon:9606	20031216
P01011	SERPINA3	GO:0005615	extracellular space	GO_REF:0000002	IEA	cellular_component	taxon:9606	20220419
P01011	SERPINA3	GO:0004867	serine-type endopeptidase inhibitor activity	GO_REF:0000002	IEA	molecular_function	taxon:9606	20220419
P01011	SERPINA3	GO:0005576	extracellular region	Reactome:R-HSA-6798748	TAS	cellular_component	taxon:9606	20151022
P01011	SERPINA3	GO:0005576	extracellular region	GO_REF:0000044	IEA	cellular_component	taxon:9606	20220419
P01011	SERPINA3	GO:0031093	platelet alpha granule lumen	Reactome:R-HSA-481007	TAS	cellular_component	taxon:9606	20151211
P01011	SERPINA3	GO:0005576	extracellular region	PMID:9880565	NAS	cellular_component	taxon:9606	20031216
P01011	SERPINA3	GO:0005615	extracellular space	PMID:16502470	HDA	cellular_component	taxon:9606	20140603
P01011	SERPINA3	GO:0005515	protein binding	PMID:32814053	IPI	molecular_function	taxon:9606	20220423
P01011	SERPINA3	GO:0005615	extracellular space	PMID:21873635	IBA	cellular_component	taxon:9606	20211110
P01011	SERPINA3	GO:0070062	extracellular exosome	PMID:23533145	HDA	cellular_component	taxon:9606	20140714
P01011	SERPINA3	GO:0010951	negative regulation of endopeptidase activity	PMID:21873635	IBA	biological_process	taxon:9606	20210217
P01011	SERPINA3	GO:0003677	DNA binding	PMID:14668352	TAS	molecular_function	taxon:9606	20061205
P01011	SERPINA3	GO:0005615	extracellular space	PMID:25645918	IDA	cellular_component	taxon:9606	20150709
P01011	SERPINA3	GO:0005515	protein binding	PMID:14687906	IPI	molecular_function	taxon:9606	20051222
P01011	SERPINA3	GO:0006953	acute-phase response	GO_REF:0000043	IEA	biological_process	taxon:9606	20220419
P01011	SERPINA3	GO:0005576	extracellular region	Reactome:R-HSA-6798751	TAS	cellular_component	taxon:9606	20151022
P33151	CDH5	GO:0005911	cell-cell junction	PMID:21168935	IDA	cellular_component	taxon:9606	20150911
P33151	CDH5	GO:1990782	protein tyrosine kinase binding	PMID:11950700	IPI	molecular_function	taxon:9606	20190515
P33151	CDH5	GO:0005515	protein binding	PMID:20123964	IPI	molecular_function	taxon:9606	20220423
P33151	CDH5	GO:0043534	blood vessel endothelial cell migration	PMID:31934175	IMP	biological_process	taxon:9606	20200320
P33151	CDH5	GO:1903142	positive regulation of establishment of endothelial barrier	PMID:23288152	IMP	biological_process	taxon:9606	20150908
P33151	CDH5	GO:0044325	transmembrane transporter binding	PMID:19996314	IPI	molecular_function	taxon:9606	20100825
P33151	CDH5	GO:0045296	cadherin binding	PMID:21873635	IBA	molecular_function	taxon:9606	20200327
P33151	CDH5	GO:0043114	regulation of vascular permeability	PMID:26598555	IDA	biological_process	taxon:9606	20190517
P33151	CDH5	GO:0031115	negative regulation of microtubule polymerization	PMID:23159740	IDA	biological_process	taxon:9606	20210429
P33151	CDH5	GO:0008013	beta-catenin binding	PMID:18287330	IPI	molecular_function	taxon:9606	20100722
P33151	CDH5	GO:0071944	cell periphery	GO_REF:0000107	IEA	cellular_component	taxon:9606	20220419
P33151	CDH5	GO:0035307	positive regulation of protein dephosphorylation	PMID:11950700	IMP	biological_process	taxon:9606	20190516
P33151	CDH5	GO:0005886	plasma membrane	Reactome:R-HSA-419001	TAS	cellular_component	taxon:9606	20140321
P33151	CDH5	GO:0007179	transforming growth factor beta receptor signaling pathway	PMID:21168935	IDA	biological_process	taxon:9606	20150911
P33151	CDH5	GO:0005886	plasma membrane	PMID:9219219	TAS	cellular_component	taxon:9606	20030904
P33151	CDH5	GO:0007155	cell adhesion	GO_REF:0000002	IEA	biological_process	taxon:9606	20220419
P33151	CDH5	GO:0008285	negative regulation of cell population proliferation	GO_REF:0000107	IEA	biological_process	taxon:9606	20220419
P33151	CDH5	GO:0005886	plasma membrane	GO_REF:0000107	IEA	cellular_component	taxon:9606	20220419
P33151	CDH5	GO:0030335	positive regulation of cell migration	PMID:15572031	IDA	biological_process	taxon:9606	20190521
P33151	CDH5	GO:0005515	protein binding	PMID:18662404	IPI	molecular_function	taxon:9606	20220423
P33151	CDH5	GO:0005923	bicellular tight junction	GO_REF:0000107	IEA	cellular_component	taxon:9606	20220419
P33151	CDH5	GO:0031965	nuclear membrane	GO_REF:0000052	IDA	cellular_component	taxon:9606	20190905
P33151	CDH5	GO:0030513	positive regulation of BMP signaling pathway	PMID:26598555	IMP	biological_process	taxon:9606	20190517
P33151	CDH5	GO:0007156	homophilic cell adhesion via plasma membrane adhesion molecules	GO_REF:0000002	IEA	biological_process	taxon:9606	20220419
P33151	CDH5	GO:0005886	plasma membrane	GO_REF:0000002	IEA	cellular_component	taxon:9606	20220419
P33151	CDH5	GO:0070161	anchoring junction	GO_REF:0000043	IEA	cellular_component	taxon:9606	20220419
P33151	CDH5	GO:0046872	metal ion binding	GO_REF:0000043	IEA	molecular_function	taxon:9606	20220419
P33151	CDH5	GO:0019903	protein phosphatase binding	PMID:28926625	IPI	molecular_function	taxon:9606	20190523
P33151	CDH5	GO:0098742	cell-cell adhesion via plasma-membrane adhesion molecules	PMID:21873635	IBA	biological_process	taxon:9606	20200327
P33151	CDH5	GO:0005912	adherens junction	GO_REF:0000107	IEA	cellular_component	taxon:9606	20220419
P33151	CDH5	GO:0005886	plasma membrane	GO_REF:0000117	IEA	cellular_component	taxon:9606	20220419
P33151	CDH5	GO:0005515	protein binding	PMID:20332120	IPI	molecular_function	taxon:9606	20110221
P33151	CDH5	GO:0016020	membrane	GO_REF:0000043	IEA	cellular_component	taxon:9606	20220419
P33151	CDH5	GO:0006874	cellular calcium ion homeostasis	PMID:23159740	IDA	biological_process	taxon:9606	20190522
P33151	CDH5	GO:0005886	plasma membrane	Reactome:R-HSA-419002	TAS	cellular_component	taxon:9606	20140321
P33151	CDH5	GO:2000352	negative regulation of endothelial cell apoptotic process	PMID:31934175	IMP	biological_process	taxon:9606	20200320
P33151	CDH5	GO:0005886	plasma membrane	GO_REF:0000044	IEA	cellular_component	taxon:9606	20220419
P33151	CDH5	GO:0005912	adherens junction	PMID:26598555	IDA	cellular_component	taxon:9606	20190517
P33151	CDH5	GO:0005515	protein binding	PMID:15985432	IPI	molecular_function	taxon:9606	20190603
P33151	CDH5	GO:0009986	cell surface	PMID:23288152	IDA	cellular_component	taxon:9606	20150908
P33151	CDH5	GO:0070830	bicellular tight junction assembly	PMID:25753039	IMP	biological_process	taxon:9606	20190925
P33151	CDH5	GO:0031334	positive regulation of protein-containing complex assembly	PMID:26598555	IMP	biological_process	taxon:9606	20190520
P33151	CDH5	GO:0007043	cell-cell junction assembly	PMID:23288152	IMP	biological_process	taxon:9606	20150908
P33151	CDH5	GO:0016020	membrane	PMID:9219219	TAS	cellular_component	taxon:9606	20030904
P33151	CDH5	GO:0005886	plasma membrane	GO_REF:0000043	IEA	cellular_component	taxon:9606	20220419
P33151	CDH5	GO:0043184	vascular endothelial growth factor receptor 2 binding	PMID:25893857	IPI	molecular_function	taxon:9606	20181122
P33151	CDH5	GO:0005912	adherens junction	PMID:21873635	IBA	cellular_component	taxon:9606	20200327
P33151	CDH5	GO:0016021	integral component of membrane	GO_REF:0000043	IEA	cellular_component	taxon:9606	20220419
P33151	CDH5	GO:0034332	adherens junction organization	PMID:26598555	IDA	biological_process	taxon:9606	20190517
P33151	CDH5	GO:0005515	protein binding	PMID:26923917	IPI	molecular_function	taxon:9606	20191009
P33151	CDH5	GO:0098609	cell-cell adhesion	GO_REF:0000107	IEA	biological_process	taxon:9606	20220419
P33151	CDH5	GO:0005886	plasma membrane	Reactome:R-HSA-5357477	TAS	cellular_component	taxon:9606	20140321
P33151	CDH5	GO:0005654	nucleoplasm	GO_REF:0000052	IDA	cellular_component	taxon:9606	20190905
P33151	CDH5	GO:0034332	adherens junction organization	PMID:21873635	IBA	biological_process	taxon:9606	20170829
P33151	CDH5	GO:0050728	negative regulation of inflammatory response	PMID:28112401	IGI	biological_process	taxon:9606	20171208
P33151	CDH5	GO:0005911	cell-cell junction	PMID:20332120	IDA	cellular_component	taxon:9606	20110221
P33151	CDH5	GO:0005911	cell-cell junction	PMID:15572031	IDA	cellular_component	taxon:9606	20190704
P33151	CDH5	GO:0005509	calcium ion binding	PMID:21873635	IBA	molecular_function	taxon:9606	20200327
P33151	CDH5	GO:0005515	protein binding	PMID:20010843	IPI	molecular_function	taxon:9606	20220423
P33151	CDH5	GO:0001932	regulation of protein phosphorylation	PMID:23159740	IDA	biological_process	taxon:9606	20190522
P33151	CDH5	GO:0070700	BMP receptor binding	PMID:26598555	IPI	molecular_function	taxon:9606	20190517
P33151	CDH5	GO:0007043	cell-cell junction assembly	PMID:21873635	IBA	biological_process	taxon:9606	20200809
P33151	CDH5	GO:0035633	maintenance of blood-brain barrier	PMID:30280653	NAS	biological_process	taxon:9606	20200408
P33151	CDH5	GO:0005911	cell-cell junction	GO_REF:0000107	IEA	cellular_component	taxon:9606	20220419
P33151	CDH5	GO:1902396	protein localization to bicellular tight junction	PMID:25753039	IMP	biological_process	taxon:9606	20190925
P33151	CDH5	GO:0005912	adherens junction	PMID:25978380	IDA	cellular_component	taxon:9606	20161208
P33151	CDH5	GO:0019903	protein phosphatase binding	GO_REF:0000107	IEA	molecular_function	taxon:9606	20220419
P33151	CDH5	GO:0001955	blood vessel maturation	GO_REF:0000002	IEA	biological_process	taxon:9606	20220419
P33151	CDH5	GO:0005886	plasma membrane	GO_REF:0000052	IDA	cellular_component	taxon:9606	20190905
P33151	CDH5	GO:0005515	protein binding	PMID:28514442	IPI	molecular_function	taxon:9606	20220423
P33151	CDH5	GO:0005911	cell-cell junction	PMID:19996314	IDA	cellular_component	taxon:9606	20100722
P33151	CDH5	GO:0005911	cell-cell junction	PMID:23288152	IDA	cellular_component	taxon:9606	20150827
P33151	CDH5	GO:0030054	cell junction	GO_REF:0000024	ISS	cellular_component	taxon:9606	20130719
P33151	CDH5	GO:0016339	calcium-dependent cell-cell adhesion via plasma membrane cell adhesion molecules	PMID:21873635	IBA	biological_process	taxon:9606	20170829
P33151	CDH5	GO:0098609	cell-cell adhesion	PMID:15572031	IDA	biological_process	taxon:9606	20190704
P33151	CDH5	GO:0007155	cell adhesion	GO_REF:0000043	IEA	biological_process	taxon:9606	20220419
P33151	CDH5	GO:0005515	protein binding	PMID:17057644	IPI	molecular_function	taxon:9606	20220423
P33151	CDH5	GO:0070161	anchoring junction	GO_REF:0000044	IEA	cellular_component	taxon:9606	20220419
P33151	CDH5	GO:0005102	signaling receptor binding	PMID:12088286	IPI	molecular_function	taxon:9606	20080609
P33151	CDH5	GO:0005515	protein binding	PMID:18287330	IPI	molecular_function	taxon:9606	20220423
P33151	CDH5	GO:0030054	cell junction	GO_REF:0000107	IEA	cellular_component	taxon:9606	20220419
P33151	CDH5	GO:0000902	cell morphogenesis	PMID:21873635	IBA	biological_process	taxon:9606	20200809
P33151	CDH5	GO:0005912	adherens junction	PMID:26923917	IMP	cellular_component	taxon:9606	20191009
P33151	CDH5	GO:0044331	cell-cell adhesion mediated by cadherin	PMID:26598555	IDA	biological_process	taxon:9606	20190517
P33151	CDH5	GO:0005509	calcium ion binding	GO_REF:0000002	IEA	molecular_function	taxon:9606	20220419
P33151	CDH5	GO:0001944	vasculature development	PMID:21873635	IBA	biological_process	taxon:9606	20200327
P33151	CDH5	GO:2000114	regulation of establishment of cell polarity	GO_REF:0000107	IEA	biological_process	taxon:9606	20220419
P33151	CDH5	GO:0005515	protein binding	PMID:21183689	IPI	molecular_function	taxon:9606	20181213
P33151	CDH5	GO:0070051	fibrinogen binding	PMID:19413351	IMP	molecular_function	taxon:9606	20190521
P33151	CDH5	GO:2000114	regulation of establishment of cell polarity	PMID:21873635	IBA	biological_process	taxon:9606	20200327
P33151	CDH5	GO:0005923	bicellular tight junction	PMID:21873635	IBA	cellular_component	taxon:9606	20200327
P33151	CDH5	GO:0016020	membrane	GO_REF:0000002	IEA	cellular_component	taxon:9606	20220419
P33151	CDH5	GO:2000114	regulation of establishment of cell polarity	PMID:20332120	IMP	biological_process	taxon:9606	20110221
P33151	CDH5	GO:0009897	external side of plasma membrane	GO_REF:0000107	IEA	cellular_component	taxon:9606	20220419
P33151	CDH5	GO:0098609	cell-cell adhesion	GO_REF:0000002	IEA	biological_process	taxon:9606	20220419
P33151	CDH5	GO:0007156	homophilic cell adhesion via plasma membrane adhesion molecules	PMID:9219219	TAS	biological_process	taxon:9606	20030904
P33151	CDH5	GO:0001955	blood vessel maturation	GO_REF:0000107	IEA	biological_process	taxon:9606	20220419
P33151	CDH5	GO:0045766	positive regulation of angiogenesis	PMID:22391569	IGI	biological_process	taxon:9606	20180111
P33151	CDH5	GO:0016342	catenin complex	PMID:21873635	IBA	cellular_component	taxon:9606	20200327
P33151	CDH5	GO:0010628	positive regulation of gene expression	PMID:26598555	IMP	biological_process	taxon:9606	20190517
P33151	CDH5	GO:0005886	plasma membrane	PMID:25978380	IDA	cellular_component	taxon:9606	20161208
P02743	APCS	GO:0044869	negative regulation by host of viral exo-alpha-sialidase activity	PMID:23544079	IDA	biological_process	taxon:9606|taxon:387139	20140923
P02743	APCS	GO:0005615	extracellular space	PMID:10972085	TAS	cellular_component	taxon:9606	20030904
P02743	APCS	GO:0070062	extracellular exosome	PMID:19056867	HDA	cellular_component	taxon:9606	20131024
P02743	APCS	GO:0046790	virion binding	PMID:23544079	IDA	molecular_function	taxon:9606	20200117
P02743	APCS	GO:0005515	protein binding	PMID:32814053	IPI	molecular_function	taxon:9606	20220423
P02743	APCS	GO:0005576	extracellular region	GO_REF:0000043	IEA	cellular_component	taxon:9606	20220419
P02743	APCS	GO:0005509	calcium ion binding	PMID:23544079	IDA	molecular_function	taxon:9606	20200117
P02743	APCS	GO:0006457	protein folding	PMID:10812074	TAS	biological_process	taxon:9606	20030904
P02743	APCS	GO:0051082	unfolded protein binding	PMID:10812074	TAS	molecular_function	taxon:9606	20040806
P02743	APCS	GO:0005634	nucleus	PMID:21630459	HDA	cellular_component	taxon:9606	20140320
P02743	APCS	GO:1903019	negative regulation of glycoprotein metabolic process	PMID:23544079	IDA	biological_process	taxon:9606	20140514
P02743	APCS	GO:0005615	extracellular space	PMID:20551380	HDA	cellular_component	taxon:9606	20180313
P02743	APCS	GO:0045087	innate immune response	PMID:21873635	IBA	biological_process	taxon:9606	20220106
P02743	APCS	GO:0002674	negative regulation of acute inflammatory response	PMID:14607961	IC	biological_process	taxon:9606	20140514
P02743	APCS	GO:0005615	extracellular space	PMID:14607961	IDA	cellular_component	taxon:9606	20140514
P02743	APCS	GO:0045087	innate immune response	PMID:23544079	IDA	biological_process	taxon:9606	20140514
P02743	APCS	GO:0042802	identical protein binding	PMID:23850452	IPI	molecular_function	taxon:9606	20220423
P02743	APCS	GO:0061045	negative regulation of wound healing	PMID:14607961	IC	biological_process	taxon:9606	20140514
P02743	APCS	GO:0005576	extracellular region	PMID:14718574	NAS	cellular_component	taxon:9606	20040422
P02743	APCS	GO:0070062	extracellular exosome	PMID:23533145	HDA	cellular_component	taxon:9606	20140714
P02743	APCS	GO:0045656	negative regulation of monocyte differentiation	PMID:14607961	IDA	biological_process	taxon:9606	20150812
P02743	APCS	GO:0005615	extracellular space	PMID:23544079	IDA	cellular_component	taxon:9606	20140514
P02743	APCS	GO:0005515	protein binding	PMID:32296183	IPI	molecular_function	taxon:9606	20220423
P02743	APCS	GO:0072562	blood microparticle	PMID:22516433	HDA	cellular_component	taxon:9606	20131223
P02743	APCS	GO:0005576	extracellular region	Reactome:R-HSA-976734	TAS	cellular_component	taxon:9606	20130528
P02743	APCS	GO:0030246	carbohydrate binding	GO_REF:0000043	IEA	molecular_function	taxon:9606	20220419
P02743	APCS	GO:0005576	extracellular region	Reactome:R-HSA-976723	TAS	cellular_component	taxon:9606	20130528
P02743	APCS	GO:0051131	chaperone-mediated protein complex assembly	PMID:10972085	TAS	biological_process	taxon:9606	20041129
P02743	APCS	GO:0044871	negative regulation by host of viral glycoprotein metabolic process	PMID:23544079	IDA	biological_process	taxon:9606|taxon:387139	20140923
P02743	APCS	GO:0005615	extracellular space	PMID:21873635	IBA	cellular_component	taxon:9606	20220106
P02743	APCS	GO:0042802	identical protein binding	PMID:19372378	IPI	molecular_function	taxon:9606	20220423
P02743	APCS	GO:0042802	identical protein binding	PMID:22396542	IPI	molecular_function	taxon:9606	20220423
P02743	APCS	GO:0005515	protein binding	PMID:21106539	IPI	molecular_function	taxon:9606	20220423
P02743	APCS	GO:0005515	protein binding	PMID:22396542	IPI	molecular_function	taxon:9606	20220423
P02743	APCS	GO:0062023	collagen-containing extracellular matrix	PMID:27559042	HDA	cellular_component	taxon:9606	20180329
P02743	APCS	GO:0046872	metal ion binding	GO_REF:0000043	IEA	molecular_function	taxon:9606	20220419
P02743	APCS	GO:1903016	negative regulation of exo-alpha-sialidase activity	PMID:23544079	IDA	biological_process	taxon:9606	20140514
P02743	APCS	GO:0062023	collagen-containing extracellular matrix	PMID:20551380	HDA	cellular_component	taxon:9606	20180313
P02743	APCS	GO:0001849	complement component C1q complex binding	PMID:21873635	IBA	molecular_function	taxon:9606	20220106
P02743	APCS	GO:0005576	extracellular region	GO_REF:0000044	IEA	cellular_component	taxon:9606	20220419
P02743	APCS	GO:0001849	complement component C1q complex binding	PMID:23544079	IDA	molecular_function	taxon:9606	20200117
P02743	APCS	GO:0005576	extracellular region	PMID:27068509	HDA	cellular_component	taxon:9606	20180329
P02743	APCS	GO:0005576	extracellular region	Reactome:R-HSA-976817	TAS	cellular_component	taxon:9606	20130528
P02743	APCS	GO:0046597	negative regulation of viral entry into host cell	PMID:23544079	IDA	biological_process	taxon:9606	20151109
P02743	APCS	GO:0006953	acute-phase response	PMID:2987268	TAS	biological_process	taxon:9606	20040129
P02743	APCS	GO:0048525	negative regulation of viral process	PMID:23544079	IDA	biological_process	taxon:9606	20151106
P02743	APCS	GO:0005576	extracellular region	Reactome:R-HSA-977224	TAS	cellular_component	taxon:9606	20130528
P02765	AHSG	GO:0030500	regulation of bone mineralization	PMID:3474608	NAS	biological_process	taxon:9606	20040305
P02765	AHSG	GO:0005576	extracellular region	PMID:14718574	NAS	cellular_component	taxon:9606	20040415
P02765	AHSG	GO:0001501	skeletal system development	PMID:12153747	NAS	biological_process	taxon:9606	20040305
P02765	AHSG	GO:0005576	extracellular region	Reactome:R-HSA-6798748	TAS	cellular_component	taxon:9606	20151015
P02765	AHSG	GO:0006953	acute-phase response	PMID:12153747	IDA	biological_process	taxon:9606	20040305
P02765	AHSG	GO:0005576	extracellular region	PMID:27068509	HDA	cellular_component	taxon:9606	20180329
P02765	AHSG	GO:0005615	extracellular space	PMID:16502470	HDA	cellular_component	taxon:9606	20140603
P02765	AHSG	GO:0030502	negative regulation of bone mineralization	GO_REF:0000107	IEA	biological_process	taxon:9606	20220419
P02765	AHSG	GO:0030502	negative regulation of bone mineralization	GO_REF:0000024	ISS	biological_process	taxon:9606	20041006
P02765	AHSG	GO:0010951	negative regulation of endopeptidase activity	PMID:21873635	IBA	biological_process	taxon:9606	20200319
P02765	AHSG	GO:0005615	extracellular space	PMID:11922920	NAS	cellular_component	taxon:9606	20040305
P02765	AHSG	GO:0050766	positive regulation of phagocytosis	PMID:12725640	IDA	biological_process	taxon:9606	20040305
P02765	AHSG	GO:0004866	endopeptidase inhibitor activity	PMID:21873635	IBA	molecular_function	taxon:9606	20200319
P02765	AHSG	GO:0001503	ossification	GO_REF:0000107	IEA	biological_process	taxon:9606	20220419
P02765	AHSG	GO:0031093	platelet alpha granule lumen	Reactome:R-HSA-481007	TAS	cellular_component	taxon:9606	20151211
P02765	AHSG	GO:0070062	extracellular exosome	PMID:19056867	HDA	cellular_component	taxon:9606	20131024
P02765	AHSG	GO:0006907	pinocytosis	PMID:12773197	NAS	biological_process	taxon:9606	20040305
P02765	AHSG	GO:0034774	secretory granule lumen	Reactome:R-HSA-6798748	TAS	cellular_component	taxon:9606	20160715
P02765	AHSG	GO:0005615	extracellular space	GO_REF:0000002	IEA	cellular_component	taxon:9606	20220419
P02765	AHSG	GO:0031012	extracellular matrix	PMID:21873635	IBA	cellular_component	taxon:9606	20200319
P02765	AHSG	GO:0046627	negative regulation of insulin receptor signaling pathway	PMID:12153747	NAS	biological_process	taxon:9606	20040305
P02765	AHSG	GO:0050727	regulation of inflammatory response	PMID:12642050	IMP	biological_process	taxon:9606	20040305
P02765	AHSG	GO:0030500	regulation of bone mineralization	GO_REF:0000043	IEA	biological_process	taxon:9606	20220419
P02765	AHSG	GO:0019210	kinase inhibitor activity	PMID:12203945	NAS	molecular_function	taxon:9606	20040305
P02765	AHSG	GO:0072562	blood microparticle	PMID:22516433	HDA	cellular_component	taxon:9606	20131223
P02765	AHSG	GO:0005576	extracellular region	PMID:21873635	IBA	cellular_component	taxon:9606	20210128
P02765	AHSG	GO:0005576	extracellular region	GO_REF:0000043	IEA	cellular_component	taxon:9606	20220419
P02765	AHSG	GO:0004869	cysteine-type endopeptidase inhibitor activity	GO_REF:0000002	IEA	molecular_function	taxon:9606	20220419
P02765	AHSG	GO:0005576	extracellular region	Reactome:R-HSA-481007	TAS	cellular_component	taxon:9606	20151015
P02765	AHSG	GO:0005788	endoplasmic reticulum lumen	Reactome:R-HSA-8952289	TAS	cellular_component	taxon:9606	20170124
P02765	AHSG	GO:0062023	collagen-containing extracellular matrix	PMID:27559042	HDA	cellular_component	taxon:9606	20180329
P02765	AHSG	GO:0005794	Golgi apparatus	GO_REF:0000052	IDA	cellular_component	taxon:9606	20161204
P02765	AHSG	GO:0005576	extracellular region	GO_REF:0000044	IEA	cellular_component	taxon:9606	20220419
P02765	AHSG	GO:0070062	extracellular exosome	PMID:23533145	HDA	cellular_component	taxon:9606	20140714
P02748	C9	GO:0005886	plasma membrane	PMID:30552328	IC	cellular_component	taxon:9606	20201021
P02748	C9	GO:0019835	cytolysis	GO_REF:0000043	IEA	biological_process	taxon:9606	20220419
P02748	C9	GO:0005615	extracellular space	PMID:22832194	IDA	cellular_component	taxon:9606	20161223
P02748	C9	GO:0005576	extracellular region	Reactome:R-HSA-2530429	TAS	cellular_component	taxon:9606	20130528
P02748	C9	GO:0005576	extracellular region	GO_REF:0000044	IEA	cellular_component	taxon:9606	20220419
P02748	C9	GO:0051260	protein homooligomerization	PMID:30111885	IDA	biological_process	taxon:9606	20181105
P02748	C9	GO:0005615	extracellular space	PMID:26841934	IDA	cellular_component	taxon:9606	20161223
P02748	C9	GO:0005579	membrane attack complex	PMID:21873635	IBA	cellular_component	taxon:9606	20220303
P02748	C9	GO:0016021	integral component of membrane	GO_REF:0000043	IEA	cellular_component	taxon:9606	20220419
P02748	C9	GO:0005579	membrane attack complex	GO_REF:0000117	IEA	cellular_component	taxon:9606	20220419
P02748	C9	GO:0006957	complement activation, alternative pathway	GO_REF:0000043	IEA	biological_process	taxon:9606	20220419
P02748	C9	GO:0016020	membrane	GO_REF:0000043	IEA	cellular_component	taxon:9606	20220419
P02748	C9	GO:0005576	extracellular region	GO_REF:0000043	IEA	cellular_component	taxon:9606	20220419
P02748	C9	GO:0001906	cell killing	PMID:30111885	IDA	biological_process	taxon:9606	20181105
P02748	C9	GO:0006958	complement activation, classical pathway	GO_REF:0000043	IEA	biological_process	taxon:9606	20220419
P02748	C9	GO:0005579	membrane attack complex	GO_REF:0000043	IEA	cellular_component	taxon:9606	20220419
P02748	C9	GO:0051260	protein homooligomerization	PMID:26841934	IDA	biological_process	taxon:9606	20161223
P02748	C9	GO:0072562	blood microparticle	PMID:22516433	HDA	cellular_component	taxon:9606	20131223
P02748	C9	GO:0050778	positive regulation of immune response	PMID:30552328	IC	biological_process	taxon:9606	20201021
P02748	C9	GO:0005576	extracellular region	Reactome:R-HSA-2530445	TAS	cellular_component	taxon:9606	20130528
P02748	C9	GO:0070062	extracellular exosome	PMID:23533145	HDA	cellular_component	taxon:9606	20140714
P02748	C9	GO:0001906	cell killing	PMID:26841934	IDA	biological_process	taxon:9606	20161223
P02748	C9	GO:0005615	extracellular space	PMID:21873635	IBA	cellular_component	taxon:9606	20220303
P02748	C9	GO:0005515	protein binding	PMID:32814053	IPI	molecular_function	taxon:9606	20220423
P02748	C9	GO:0005579	membrane attack complex	GO_REF:0000002	IEA	cellular_component	taxon:9606	20220419
P02748	C9	GO:0005579	membrane attack complex	PMID:22832194	IDA	cellular_component	taxon:9606	20161223
P02748	C9	GO:0005579	membrane attack complex	PMID:26841934	IDA	cellular_component	taxon:9606	20161223
P02748	C9	GO:0002376	immune system process	GO_REF:0000043	IEA	biological_process	taxon:9606	20220419
P02748	C9	GO:0006955	immune response	GO_REF:0000002	IEA	biological_process	taxon:9606	20220419
P02748	C9	GO:0005576	extracellular region	Reactome:R-HSA-8852580	TAS	cellular_component	taxon:9606	20130528
P02748	C9	GO:0005579	membrane attack complex	PMID:30552328	IPI	cellular_component	taxon:9606	20201021
P02748	C9	GO:0070062	extracellular exosome	PMID:19056867	HDA	cellular_component	taxon:9606	20131024
P02748	C9	GO:0045087	innate immune response	GO_REF:0000043	IEA	biological_process	taxon:9606	20220419
P02748	C9	GO:0005886	plasma membrane	PMID:26841934	IDA	cellular_component	taxon:9606	20161223
P02748	C9	GO:0006956	complement activation	PMID:21873635	IBA	biological_process	taxon:9606	20220303
P02748	C9	GO:0005576	extracellular region	Reactome:R-HSA-173725	TAS	cellular_component	taxon:9606	20130528
P00450	CP	GO:0005576	extracellular region	Reactome:R-HSA-917891	TAS	cellular_component	taxon:9606	20130516
P00450	CP	GO:0005765	lysosomal membrane	PMID:17897319	HDA	cellular_component	taxon:9606	20130924
P00450	CP	GO:0005576	extracellular region	Reactome:R-HSA-5655733	TAS	cellular_component	taxon:9606	20130516
P00450	CP	GO:0070062	extracellular exosome	PMID:23533145	HDA	cellular_component	taxon:9606	20140714
P00450	CP	GO:0005615	extracellular space	PMID:16502470	HDA	cellular_component	taxon:9606	20140603
P00450	CP	GO:0005886	plasma membrane	PMID:21873635	IBA	cellular_component	taxon:9606	20181121
P00450	CP	GO:0055072	iron ion homeostasis	PMID:21873635	IBA	biological_process	taxon:9606	20181121
P00450	CP	GO:0004322	ferroxidase activity	Reactome:R-HSA-917891	TAS	molecular_function	taxon:9606	20211108
P00450	CP	GO:0016491	oxidoreductase activity	PMID:21873635	IBA	molecular_function	taxon:9606	20200807
P00450	CP	GO:0005576	extracellular region	PMID:14718574	NAS	cellular_component	taxon:9606	20040415
P00450	CP	GO:0051087	chaperone binding	PMID:19996109	IPI	molecular_function	taxon:9606	20100113
P00450	CP	GO:0070062	extracellular exosome	PMID:19056867	HDA	cellular_component	taxon:9606	20131024
P00450	CP	GO:0016491	oxidoreductase activity	GO_REF:0000043	IEA	molecular_function	taxon:9606	20220419
P00450	CP	GO:0005615	extracellular space	PMID:7708681	TAS	cellular_component	taxon:9606	20030904
P00450	CP	GO:0005576	extracellular region	Reactome:R-HSA-5621402	TAS	cellular_component	taxon:9606	20140919
P00450	CP	GO:0005615	extracellular space	PMID:19996109	IDA	cellular_component	taxon:9606	20100113
P00450	CP	GO:0006825	copper ion transport	GO_REF:0000043	IEA	biological_process	taxon:9606	20220419
P00450	CP	GO:0072562	blood microparticle	PMID:22516433	HDA	cellular_component	taxon:9606	20131223
P00450	CP	GO:0004322	ferroxidase activity	GO_REF:0000003	IEA	molecular_function	taxon:9606	20220419
P00450	CP	GO:0005576	extracellular region	GO_REF:0000043	IEA	cellular_component	taxon:9606	20220419
P00450	CP	GO:0006879	cellular iron ion homeostasis	PMID:9445478	TAS	biological_process	taxon:9606	20030904
P00450	CP	GO:0005615	extracellular space	PMID:20551380	HDA	cellular_component	taxon:9606	20180313
P00450	CP	GO:0004322	ferroxidase activity	PMID:7708681	TAS	molecular_function	taxon:9606	20030904
P00450	CP	GO:0006811	ion transport	GO_REF:0000043	IEA	biological_process	taxon:9606	20220419
P00450	CP	GO:0005788	endoplasmic reticulum lumen	Reactome:R-HSA-8952289	TAS	cellular_component	taxon:9606	20170124
P00450	CP	GO:0016491	oxidoreductase activity	GO_REF:0000002	IEA	molecular_function	taxon:9606	20220419
P00450	CP	GO:0006826	iron ion transport	PMID:21873635	IBA	biological_process	taxon:9606	20181121
P00450	CP	GO:0006879	cellular iron ion homeostasis	Reactome:R-HSA-917937	TAS	biological_process	taxon:9606	20220103
P00450	CP	GO:0005576	extracellular region	GO_REF:0000044	IEA	cellular_component	taxon:9606	20220419
P00450	CP	GO:0004322	ferroxidase activity	GO_REF:0000116	IEA	molecular_function	taxon:9606	20220419
P00450	CP	GO:0005507	copper ion binding	GO_REF:0000002	IEA	molecular_function	taxon:9606	20220419
P00450	CP	GO:0046872	metal ion binding	GO_REF:0000043	IEA	molecular_function	taxon:9606	20220419
P00450	CP	GO:0005576	extracellular region	Reactome:R-HSA-904830	TAS	cellular_component	taxon:9606	20130516
O75882	ATRN	GO:0070062	extracellular exosome	PMID:23533145	HDA	cellular_component	taxon:9606	20140714
O75882	ATRN	GO:0005886	plasma membrane	PMID:9736737	NAS	cellular_component	taxon:9606	20040811
O75882	ATRN	GO:0006954	inflammatory response	GO_REF:0000043	IEA	biological_process	taxon:9606	20220419
O75882	ATRN	GO:0042552	myelination	GO_REF:0000107	IEA	biological_process	taxon:9606	20220419
O75882	ATRN	GO:0034446	substrate adhesion-dependent cell spreading	PMID:21873635	IBA	biological_process	taxon:9606	20190301
O75882	ATRN	GO:0005576	extracellular region	GO_REF:0000043	IEA	cellular_component	taxon:9606	20220419
O75882	ATRN	GO:0009888	tissue development	PMID:21873635	IBA	biological_process	taxon:9606	20220413
O75882	ATRN	GO:0016020	membrane	GO_REF:0000043	IEA	cellular_component	taxon:9606	20220419
O75882	ATRN	GO:0005576	extracellular region	GO_REF:0000044	IEA	cellular_component	taxon:9606	20220419
O75882	ATRN	GO:0005886	plasma membrane	PMID:21873635	IBA	cellular_component	taxon:9606	20190301
O75882	ATRN	GO:0030246	carbohydrate binding	GO_REF:0000043	IEA	molecular_function	taxon:9606	20220419
O75882	ATRN	GO:0005604	basement membrane	PMID:21873635	IBA	cellular_component	taxon:9606	20201204
O75882	ATRN	GO:0005615	extracellular space	PMID:16502470	HDA	cellular_component	taxon:9606	20140603
O75882	ATRN	GO:0038023	signaling receptor activity	GO_REF:0000107	IEA	molecular_function	taxon:9606	20220419
O75882	ATRN	GO:0006979	response to oxidative stress	GO_REF:0000107	IEA	biological_process	taxon:9606	20220419
O75882	ATRN	GO:0005737	cytoplasm	GO_REF:0000107	IEA	cellular_component	taxon:9606	20220419
O75882	ATRN	GO:0009887	animal organ morphogenesis	PMID:21873635	IBA	biological_process	taxon:9606	20220413
O75882	ATRN	GO:0005886	plasma membrane	GO_REF:0000044	IEA	cellular_component	taxon:9606	20220419
O75882	ATRN	GO:0043473	pigmentation	GO_REF:0000107	IEA	biological_process	taxon:9606	20220419
O75882	ATRN	GO:0070062	extracellular exosome	PMID:19056867	HDA	cellular_component	taxon:9606	20131024
O75882	ATRN	GO:0005887	integral component of plasma membrane	PMID:10086356	TAS	cellular_component	taxon:9606	20030904
O75882	ATRN	GO:0038023	signaling receptor activity	PMID:10086356	TAS	molecular_function	taxon:9606	20030904
O75882	ATRN	GO:0005886	plasma membrane	GO_REF:0000043	IEA	cellular_component	taxon:9606	20220419
O75882	ATRN	GO:0016021	integral component of membrane	GO_REF:0000043	IEA	cellular_component	taxon:9606	20220419
O75882	ATRN	GO:0005615	extracellular space	PMID:17261078	IDA	cellular_component	taxon:9606	20100804
O75882	ATRN	GO:0016477	cell migration	PMID:21873635	IBA	biological_process	taxon:9606	20190301
O75882	ATRN	GO:0021549	cerebellum development	GO_REF:0000107	IEA	biological_process	taxon:9606	20220419
O75882	ATRN	GO:0040014	regulation of multicellular organism growth	GO_REF:0000107	IEA	biological_process	taxon:9606	20220419
O75882	ATRN	GO:0005886	plasma membrane	GO_REF:0000107	IEA	cellular_component	taxon:9606	20220419
O75882	ATRN	GO:0005615	extracellular space	PMID:9736737	TAS	cellular_component	taxon:9606	20030904
Q96PD5	PGLYRP2	GO:0016045	detection of bacterium	PMID:21873635	IBA	biological_process	taxon:9606	20190821
Q96PD5	PGLYRP2	GO:0016020	membrane	PMID:11461926	NAS	cellular_component	taxon:9606	20031216
Q96PD5	PGLYRP2	GO:0051701	biological process involved in interaction with host	GO_REF:0000107	IEA	biological_process	taxon:9606	20220419
Q96PD5	PGLYRP2	GO:0008745	N-acetylmuramoyl-L-alanine amidase activity	PMID:14506276	IDA	molecular_function	taxon:9606	20161025
Q96PD5	PGLYRP2	GO:0016787	hydrolase activity	GO_REF:0000043	IEA	molecular_function	taxon:9606	20220419
Q96PD5	PGLYRP2	GO:0005576	extracellular region	Reactome:R-HSA-6799977	TAS	cellular_component	taxon:9606	20160715
Q96PD5	PGLYRP2	GO:0016045	detection of bacterium	PMID:11461926	IDA	biological_process	taxon:9606	20031216
Q96PD5	PGLYRP2	GO:0008745	N-acetylmuramoyl-L-alanine amidase activity	PMID:7663175	TAS	molecular_function	taxon:9606	20061107
Q96PD5	PGLYRP2	GO:0008745	N-acetylmuramoyl-L-alanine amidase activity	GO_REF:0000003	IEA	molecular_function	taxon:9606	20220419
Q96PD5	PGLYRP2	GO:0042834	peptidoglycan binding	PMID:11461926	IDA	molecular_function	taxon:9606	20031216
Q96PD5	PGLYRP2	GO:0016020	membrane	GO_REF:0000044	IEA	cellular_component	taxon:9606	20220419
Q96PD5	PGLYRP2	GO:0032689	negative regulation of interferon-gamma production	GO_REF:0000107	IEA	biological_process	taxon:9606	20220419
Q96PD5	PGLYRP2	GO:0016019	peptidoglycan immune receptor activity	PMID:11461926	IDA	molecular_function	taxon:9606	20031216
Q96PD5	PGLYRP2	GO:0016020	membrane	GO_REF:0000043	IEA	cellular_component	taxon:9606	20220419
Q96PD5	PGLYRP2	GO:0008745	N-acetylmuramoyl-L-alanine amidase activity	GO_REF:0000002	IEA	molecular_function	taxon:9606	20220419
Q96PD5	PGLYRP2	GO:0005576	extracellular region	GO_REF:0000044	IEA	cellular_component	taxon:9606	20220419
Q96PD5	PGLYRP2	GO:0070062	extracellular exosome	PMID:23533145	HDA	cellular_component	taxon:9606	20140714
Q96PD5	PGLYRP2	GO:0032827	negative regulation of natural killer cell differentiation involved in immune response	GO_REF:0000107	IEA	biological_process	taxon:9606	20220419
Q96PD5	PGLYRP2	GO:0045087	innate immune response	PMID:11461926	NAS	biological_process	taxon:9606	20031216
Q96PD5	PGLYRP2	GO:0050727	regulation of inflammatory response	GO_REF:0000107	IEA	biological_process	taxon:9606	20220419
Q96PD5	PGLYRP2	GO:0001519	peptide amidation	PMID:7663175	NAS	biological_process	taxon:9606	20061107
Q96PD5	PGLYRP2	GO:0008270	zinc ion binding	GO_REF:0000002	IEA	molecular_function	taxon:9606	20220419
Q96PD5	PGLYRP2	GO:0046872	metal ion binding	GO_REF:0000043	IEA	molecular_function	taxon:9606	20220419
Q96PD5	PGLYRP2	GO:0050830	defense response to Gram-positive bacterium	PMID:21873635	IBA	biological_process	taxon:9606	20190821
Q96PD5	PGLYRP2	GO:0016019	peptidoglycan immune receptor activity	PMID:21873635	IBA	molecular_function	taxon:9606	20190821
Q96PD5	PGLYRP2	GO:0050830	defense response to Gram-positive bacterium	PMID:11461926	IDA	biological_process	taxon:9606	20040128
Q96PD5	PGLYRP2	GO:0005576	extracellular region	Reactome:R-HSA-6799981	TAS	cellular_component	taxon:9606	20160715
Q96PD5	PGLYRP2	GO:0005576	extracellular region	GO_REF:0000043	IEA	cellular_component	taxon:9606	20220419
Q96PD5	PGLYRP2	GO:0042834	peptidoglycan binding	PMID:21873635	IBA	molecular_function	taxon:9606	20190821
Q96PD5	PGLYRP2	GO:0002376	immune system process	GO_REF:0000043	IEA	biological_process	taxon:9606	20220419
Q96PD5	PGLYRP2	GO:0009253	peptidoglycan catabolic process	GO_REF:0000002	IEA	biological_process	taxon:9606	20220419
Q96PD5	PGLYRP2	GO:0005515	protein binding	PMID:32296183	IPI	molecular_function	taxon:9606	20220423
P05452	CLEC3B	GO:0030246	carbohydrate binding	GO_REF:0000043	IEA	molecular_function	taxon:9606	20220419
P05452	CLEC3B	GO:0062023	collagen-containing extracellular matrix	PMID:22261194	ISS	cellular_component	taxon:9606	20180206
P05452	CLEC3B	GO:0005576	extracellular region	GO_REF:0000043	IEA	cellular_component	taxon:9606	20220419
P05452	CLEC3B	GO:0005615	extracellular space	PMID:15901484	IDA	cellular_component	taxon:9606	20120910
P05452	CLEC3B	GO:0062023	collagen-containing extracellular matrix	PMID:28675934	HDA	cellular_component	taxon:9606	20180719
P05452	CLEC3B	GO:0005576	extracellular region	Reactome:R-HSA-481009	TAS	cellular_component	taxon:9606	20151211
P05452	CLEC3B	GO:0001503	ossification	PMID:7798325	IEP	biological_process	taxon:9606	20111124
P05452	CLEC3B	GO:0005576	extracellular region	PMID:14718574	NAS	cellular_component	taxon:9606	20040512
P05452	CLEC3B	GO:0005615	extracellular space	PMID:7798325	IDA	cellular_component	taxon:9606	20111124
P05452	CLEC3B	GO:0071310	cellular response to organic substance	PMID:7589422	IEP	biological_process	taxon:9606	20111124
P05452	CLEC3B	GO:0001652	granular component	PMID:15848710	IDA	cellular_component	taxon:9606	20111125
P05452	CLEC3B	GO:0010756	positive regulation of plasminogen activation	GO_REF:0000024	ISS	biological_process	taxon:9606	20111125
P05452	CLEC3B	GO:0005576	extracellular region	PMID:27068509	HDA	cellular_component	taxon:9606	20180329
P05452	CLEC3B	GO:0031089	platelet dense granule lumen	Reactome:R-HSA-481009	TAS	cellular_component	taxon:9606	20151211
P05452	CLEC3B	GO:0070062	extracellular exosome	PMID:23533145	HDA	cellular_component	taxon:9606	20140714
P05452	CLEC3B	GO:0071560	cellular response to transforming growth factor beta stimulus	PMID:7589422	IEP	biological_process	taxon:9606	20111124
P05452	CLEC3B	GO:0005737	cytoplasm	PMID:15848710	IDA	cellular_component	taxon:9606	20120910
P05452	CLEC3B	GO:0030282	bone mineralization	PMID:7798325	IDA	biological_process	taxon:9606	20111124
P05452	CLEC3B	GO:0005615	extracellular space	PMID:21873635	IBA	cellular_component	taxon:9606	20170602
P05452	CLEC3B	GO:0001503	ossification	PMID:21873635	IBA	biological_process	taxon:9606	20170602
P05452	CLEC3B	GO:0036143	kringle domain binding	PMID:9786936	IPI	molecular_function	taxon:9606	20120311
P05452	CLEC3B	GO:0005509	calcium ion binding	PMID:9786936	IDA	molecular_function	taxon:9606	20111124
P05452	CLEC3B	GO:0005576	extracellular region	GO_REF:0000044	IEA	cellular_component	taxon:9606	20220419
P05452	CLEC3B	GO:0030282	bone mineralization	PMID:21873635	IBA	biological_process	taxon:9606	20200323
P05452	CLEC3B	GO:0005615	extracellular space	PMID:20551380	HDA	cellular_component	taxon:9606	20180313
P05452	CLEC3B	GO:0001503	ossification	GO_REF:0000107	IEA	biological_process	taxon:9606	20220419
P05452	CLEC3B	GO:0008201	heparin binding	PMID:10727405	IDA	molecular_function	taxon:9606	20111124
P05452	CLEC3B	GO:0030282	bone mineralization	PMID:7589422	IEP	biological_process	taxon:9606	20111124
P05452	CLEC3B	GO:0005737	cytoplasm	PMID:15901484	IDA	cellular_component	taxon:9606	20120910
P05452	CLEC3B	GO:0005737	cytoplasm	PMID:7798325	IDA	cellular_component	taxon:9606	20111124
P00738	HP	GO:0072562	blood microparticle	PMID:22516433	HDA	cellular_component	taxon:9606	20131223
P00738	HP	GO:0005576	extracellular region	Reactome:R-HSA-2168883	TAS	cellular_component	taxon:9606	20200428
P00738	HP	GO:0072562	blood microparticle	PMID:21873635	IBA	cellular_component	taxon:9606	20200330
P00738	HP	GO:0005576	extracellular region	PMID:14718574	NAS	cellular_component	taxon:9606	20040415
P00738	HP	GO:0005615	extracellular space	PMID:21873635	IBA	cellular_component	taxon:9606	20200809
P00738	HP	GO:0070062	extracellular exosome	PMID:23533145	HDA	cellular_component	taxon:9606	20140714
P00738	HP	GO:0030492	hemoglobin binding	PMID:19740759	IDA	molecular_function	taxon:9606	20110216
P00738	HP	GO:0005576	extracellular region	Reactome:R-HSA-6798749	TAS	cellular_component	taxon:9606	20160715
P00738	HP	GO:0051354	negative regulation of oxidoreductase activity	PMID:19740759	IDA	biological_process	taxon:9606	20101221
P00738	HP	GO:0035580	specific granule lumen	Reactome:R-HSA-6798749	TAS	cellular_component	taxon:9606	20160715
P00738	HP	GO:0010942	positive regulation of cell death	PMID:19740759	IDA	biological_process	taxon:9606	20101221
P00738	HP	GO:0004252	serine-type endopeptidase activity	PMID:21873635	IBA	molecular_function	taxon:9606	20170228
P00738	HP	GO:2000296	negative regulation of hydrogen peroxide catabolic process	PMID:19740759	IDA	biological_process	taxon:9606	20110110
P00738	HP	GO:1904724	tertiary granule lumen	Reactome:R-HSA-6798745	TAS	cellular_component	taxon:9606	20160715
P00738	HP	GO:0031838	haptoglobin-hemoglobin complex	PMID:19740759	IDA	cellular_component	taxon:9606	20110216
P00738	HP	GO:0005576	extracellular region	Reactome:R-HSA-6798745	TAS	cellular_component	taxon:9606	20160715
P00738	HP	GO:0031638	zymogen activation	PMID:21873635	IBA	biological_process	taxon:9606	20200330
P00738	HP	GO:0042542	response to hydrogen peroxide	PMID:19740759	IDA	biological_process	taxon:9606	20110216
P00738	HP	GO:0005576	extracellular region	Reactome:R-HSA-2168885	TAS	cellular_component	taxon:9606	20200428
P00738	HP	GO:0042742	defense response to bacterium	GO_REF:0000043	IEA	biological_process	taxon:9606	20220419
P00738	HP	GO:0070062	extracellular exosome	PMID:19056867	HDA	cellular_component	taxon:9606	20131024
P00738	HP	GO:0002526	acute inflammatory response	PMID:21873635	IBA	biological_process	taxon:9606	20170228
P00738	HP	GO:0005515	protein binding	PMID:31142615	IPI	molecular_function	taxon:9606	20210816
P00738	HP	GO:0002376	immune system process	GO_REF:0000043	IEA	biological_process	taxon:9606	20220419
P00738	HP	GO:0071682	endocytic vesicle lumen	Reactome:R-HSA-2230938	TAS	cellular_component	taxon:9606	20200428
P00738	HP	GO:0030492	hemoglobin binding	GO_REF:0000043	IEA	molecular_function	taxon:9606	20220419
P00738	HP	GO:0006953	acute-phase response	GO_REF:0000043	IEA	biological_process	taxon:9606	20220419
P00738	HP	GO:0005615	extracellular space	PMID:21805676	IDA	cellular_component	taxon:9606	20170425
P00738	HP	GO:0016209	antioxidant activity	GO_REF:0000043	IEA	molecular_function	taxon:9606	20220419
P00738	HP	GO:0006952	defense response	PMID:7036344	TAS	biological_process	taxon:9606	20030904
P00738	HP	GO:0005615	extracellular space	PMID:16502470	HDA	cellular_component	taxon:9606	20140603
P00738	HP	GO:0005615	extracellular space	PMID:25645918	IDA	cellular_component	taxon:9606	20150709
P00738	HP	GO:0005515	protein binding	PMID:31142615	IPI	molecular_function	taxon:9606	20220423
P00738	HP	GO:0005576	extracellular region	Reactome:R-HSA-2230938	TAS	cellular_component	taxon:9606	20200428
P00738	HP	GO:0005615	extracellular space	PMID:19433579	IDA	cellular_component	taxon:9606	20120315
P00738	HP	GO:0005576	extracellular region	GO_REF:0000043	IEA	cellular_component	taxon:9606	20220419
P00738	HP	GO:0005515	protein binding	PMID:19758344	IPI	molecular_function	taxon:9606	20220423
P00738	HP	GO:0005615	extracellular space	PMID:22664934	HDA	cellular_component	taxon:9606	20131220
P00738	HP	GO:0030492	hemoglobin binding	GO_REF:0000002	IEA	molecular_function	taxon:9606	20220419
P00738	HP	GO:0098869	cellular oxidant detoxification	GO_REF:0000108	IEA	biological_process	taxon:9606	20220421
P00738	HP	GO:0010942	positive regulation of cell death	PMID:21873635	IBA	biological_process	taxon:9606	20170228
P00738	HP	GO:0005576	extracellular region	GO_REF:0000044	IEA	cellular_component	taxon:9606	20220419
P00738	HP	GO:0005576	extracellular region	GO_REF:0000002	IEA	cellular_component	taxon:9606	20220419
P43251	BTD	GO:0016787	hydrolase activity	GO_REF:0000043	IEA	molecular_function	taxon:9606	20220419
P43251	BTD	GO:0047708	biotinidase activity	GO_REF:0000116	IEA	molecular_function	taxon:9606	20220419
P43251	BTD	GO:0047708	biotinidase activity	Reactome:R-HSA-4225086	TAS	molecular_function	taxon:9606	20211108
P43251	BTD	GO:0047708	biotinidase activity	Reactome:R-HSA-3076905	TAS	molecular_function	taxon:9606	20211108
P43251	BTD	GO:0005759	mitochondrial matrix	Reactome:R-HSA-4167509	TAS	cellular_component	taxon:9606	20130815
P43251	BTD	GO:0005615	extracellular space	GO_REF:0000044	IEA	cellular_component	taxon:9606	20220419
P43251	BTD	GO:0006768	biotin metabolic process	PMID:21873635	IBA	biological_process	taxon:9606	20170228
P43251	BTD	GO:0005576	extracellular region	Reactome:R-HSA-3325540	TAS	cellular_component	taxon:9606	20130621
P43251	BTD	GO:0005759	mitochondrial matrix	Reactome:R-HSA-4225086	TAS	cellular_component	taxon:9606	20130816
P43251	BTD	GO:0007417	central nervous system development	PMID:7550325	TAS	biological_process	taxon:9606	20030904
P43251	BTD	GO:0070062	extracellular exosome	PMID:23533145	HDA	cellular_component	taxon:9606	20140714
P43251	BTD	GO:0016811	hydrolase activity, acting on carbon-nitrogen (but not peptide) bonds, in linear amides	GO_REF:0000002	IEA	molecular_function	taxon:9606	20220419
P43251	BTD	GO:0047708	biotinidase activity	Reactome:R-HSA-3325540	TAS	molecular_function	taxon:9606	20211108
P43251	BTD	GO:0005576	extracellular region	GO_REF:0000043	IEA	cellular_component	taxon:9606	20220419
P43251	BTD	GO:0006768	biotin metabolic process	Reactome:R-HSA-196780	TAS	biological_process	taxon:9606	20211127
P43251	BTD	GO:0005615	extracellular space	PMID:16502470	HDA	cellular_component	taxon:9606	20140603
P43251	BTD	GO:0047708	biotinidase activity	GO_REF:0000003	IEA	molecular_function	taxon:9606	20220419
P43251	BTD	GO:0047708	biotinidase activity	Reactome:R-HSA-4167509	TAS	molecular_function	taxon:9606	20211108
P43251	BTD	GO:0005576	extracellular region	Reactome:R-HSA-3076905	TAS	cellular_component	taxon:9606	20130516
P43251	BTD	GO:0006807	nitrogen compound metabolic process	GO_REF:0000002	IEA	biological_process	taxon:9606	20220419
P43251	BTD	GO:0110165	cellular anatomical entity	GO_REF:0000117	IEA	cellular_component	taxon:9606	20220419
P04196	HRG	GO:0030193	regulation of blood coagulation	PMID:6740558	IDA	biological_process	taxon:9606	20110815
P04196	HRG	GO:0005515	protein binding	PMID:19712047	IPI	molecular_function	taxon:9606	20110815
P04196	HRG	GO:0051894	positive regulation of focal adhesion assembly	PMID:16436387	IDA	biological_process	taxon:9606	20120601
P04196	HRG	GO:0046872	metal ion binding	PMID:678554	IDA	molecular_function	taxon:9606	20110815
P04196	HRG	GO:0008270	zinc ion binding	PMID:16436387	IDA	molecular_function	taxon:9606	20120601
P04196	HRG	GO:0010951	negative regulation of endopeptidase activity	PMID:21873635	IBA	biological_process	taxon:9606	20200319
P04196	HRG	GO:0043537	negative regulation of blood vessel endothelial cell migration	GO_REF:0000024	ISS	biological_process	taxon:9606	20120605
P04196	HRG	GO:0051918	negative regulation of fibrinolysis	PMID:21873635	IBA	biological_process	taxon:9606	20170228
P04196	HRG	GO:0032956	regulation of actin cytoskeleton organization	PMID:16489009	IDA	biological_process	taxon:9606	20120605
P04196	HRG	GO:0008285	negative regulation of cell population proliferation	PMID:14744774	IDA	biological_process	taxon:9606	20120601
P04196	HRG	GO:0030168	platelet activation	PMID:19903770	IDA	biological_process	taxon:9606	20110815
P04196	HRG	GO:0030308	negative regulation of cell growth	PMID:21215706	IDA	biological_process	taxon:9606	20120601
P04196	HRG	GO:0050832	defense response to fungus	PMID:18797515	IDA	biological_process	taxon:9606|taxon:5480	20170329
P04196	HRG	GO:0005576	extracellular region	GO_REF:0000043	IEA	cellular_component	taxon:9606	20220419
P04196	HRG	GO:0010468	regulation of gene expression	PMID:21215706	IDA	biological_process	taxon:9606	20120601
P04196	HRG	GO:2001027	negative regulation of endothelial cell chemotaxis	PMID:14744774	IDA	biological_process	taxon:9606	20120601
P04196	HRG	GO:0005515	protein binding	PMID:11134179	IPI	molecular_function	taxon:9606	20110815
P04196	HRG	GO:0008270	zinc ion binding	PMID:15138272	IDA	molecular_function	taxon:9606	20110815
P04196	HRG	GO:0036019	endolysosome	PMID:21873635	IBA	cellular_component	taxon:9606	20170228
P04196	HRG	GO:0005515	protein binding	PMID:21988832	IPI	molecular_function	taxon:9606	20220423
P04196	HRG	GO:0005886	plasma membrane	Reactome:R-HSA-158925	TAS	cellular_component	taxon:9606	20130528
P04196	HRG	GO:0050832	defense response to fungus	PMID:18797515	IDA	biological_process	taxon:9606|taxon:5478	20170329
P04196	HRG	GO:0043395	heparan sulfate proteoglycan binding	PMID:16436387	IDA	molecular_function	taxon:9606	20120601
P04196	HRG	GO:0004867	serine-type endopeptidase inhibitor activity	PMID:21873635	IBA	molecular_function	taxon:9606	20170228
P04196	HRG	GO:0005576	extracellular region	PMID:18797515	IDA	cellular_component	taxon:9606	20111011
P04196	HRG	GO:0005576	extracellular region	Reactome:R-HSA-481007	TAS	cellular_component	taxon:9606	20130503
P04196	HRG	GO:0042730	fibrinolysis	GO_REF:0000043	IEA	biological_process	taxon:9606	20220419
P04196	HRG	GO:0005886	plasma membrane	Reactome:R-HSA-158941	TAS	cellular_component	taxon:9606	20130528
P04196	HRG	GO:0046872	metal ion binding	GO_REF:0000043	IEA	molecular_function	taxon:9606	20220419
P04196	HRG	GO:0043065	positive regulation of apoptotic process	PMID:14744774	IDA	biological_process	taxon:9606	20120601
P04196	HRG	GO:0008201	heparin binding	GO_REF:0000043	IEA	molecular_function	taxon:9606	20220419
P04196	HRG	GO:0008201	heparin binding	PMID:21873635	IBA	molecular_function	taxon:9606	20170228
P04196	HRG	GO:0005515	protein binding	PMID:20561914	IPI	molecular_function	taxon:9606	20110815
P04196	HRG	GO:0050832	defense response to fungus	PMID:18797515	IDA	biological_process	taxon:9606|taxon:4909	20170329
P04196	HRG	GO:0016525	negative regulation of angiogenesis	PMID:19903770	IDA	biological_process	taxon:9606	20110815
P04196	HRG	GO:0051894	positive regulation of focal adhesion assembly	PMID:14744774	IDA	biological_process	taxon:9606	20120601
P04196	HRG	GO:1900747	negative regulation of vascular endothelial growth factor signaling pathway	PMID:16489009	IDA	biological_process	taxon:9606	20120605
P04196	HRG	GO:0005102	signaling receptor binding	PMID:16436387	IDA	molecular_function	taxon:9606	20220204
P04196	HRG	GO:0005515	protein binding	PMID:32296183	IPI	molecular_function	taxon:9606	20220423
P04196	HRG	GO:0062023	collagen-containing extracellular matrix	PMID:28675934	HDA	cellular_component	taxon:9606	20180719
P04196	HRG	GO:0016525	negative regulation of angiogenesis	PMID:14744774	IDA	biological_process	taxon:9606	20120601
P04196	HRG	GO:0051838	cytolysis by host of symbiont cells	PMID:18797515	IDA	biological_process	taxon:9606|taxon:5476	20191119
P04196	HRG	GO:0007596	blood coagulation	GO_REF:0000043	IEA	biological_process	taxon:9606	20220419
P04196	HRG	GO:0010543	regulation of platelet activation	GO_REF:0000024	ISS	biological_process	taxon:9606	20120605
P04196	HRG	GO:0030193	regulation of blood coagulation	PMID:21304106	IDA	biological_process	taxon:9606	20110815
P04196	HRG	GO:0004869	cysteine-type endopeptidase inhibitor activity	GO_REF:0000002	IEA	molecular_function	taxon:9606	20220419
P04196	HRG	GO:0005576	extracellular region	Reactome:R-HSA-158722	TAS	cellular_component	taxon:9606	20130516
P04196	HRG	GO:0031093	platelet alpha granule lumen	Reactome:R-HSA-481007	TAS	cellular_component	taxon:9606	20130528
P04196	HRG	GO:0008270	zinc ion binding	PMID:21304106	IDA	molecular_function	taxon:9606	20110815
P04196	HRG	GO:2000504	positive regulation of blood vessel remodeling	PMID:21215706	IDA	biological_process	taxon:9606	20120601
P04196	HRG	GO:0051838	cytolysis by host of symbiont cells	PMID:18797515	IDA	biological_process	taxon:9606|taxon:5478	20191119
P04196	HRG	GO:0004866	endopeptidase inhibitor activity	PMID:21873635	IBA	molecular_function	taxon:9606	20200319
P04196	HRG	GO:0008270	zinc ion binding	PMID:21873635	IBA	molecular_function	taxon:9606	20170228
P04196	HRG	GO:0043395	heparan sulfate proteoglycan binding	PMID:15138272	IDA	molecular_function	taxon:9606	20110815
P04196	HRG	GO:0005576	extracellular region	GO_REF:0000044	IEA	cellular_component	taxon:9606	20220419
P04196	HRG	GO:0019865	immunoglobulin binding	PMID:10514432	IDA	molecular_function	taxon:9606	20110815
P04196	HRG	GO:0006935	chemotaxis	GO_REF:0000043	IEA	biological_process	taxon:9606	20220419
P04196	HRG	GO:0001525	angiogenesis	GO_REF:0000043	IEA	biological_process	taxon:9606	20220419
P04196	HRG	GO:0033629	negative regulation of cell adhesion mediated by integrin	PMID:16489009	IDA	biological_process	taxon:9606	20120605
P04196	HRG	GO:0051838	cytolysis by host of symbiont cells	PMID:18797515	IDA	biological_process	taxon:9606|taxon:4909	20191119
P04196	HRG	GO:0005576	extracellular region	PMID:21873635	IBA	cellular_component	taxon:9606	20210128
P04196	HRG	GO:0002839	positive regulation of immune response to tumor cell	PMID:21215706	IDA	biological_process	taxon:9606	20120601
P04196	HRG	GO:0016525	negative regulation of angiogenesis	PMID:16489009	IDA	biological_process	taxon:9606	20120605
P04196	HRG	GO:0005886	plasma membrane	Reactome:R-HSA-158982	TAS	cellular_component	taxon:9606	20130528
P04196	HRG	GO:0005515	protein binding	PMID:15220341	IPI	molecular_function	taxon:9606	20110815
P04196	HRG	GO:0007162	negative regulation of cell adhesion	PMID:14744774	IDA	biological_process	taxon:9606	20120601
P04196	HRG	GO:0062023	collagen-containing extracellular matrix	PMID:25037231	HDA	cellular_component	taxon:9606	20180511
P04196	HRG	GO:0005515	protein binding	PMID:24825900	IPI	molecular_function	taxon:9606	20220423
P04196	HRG	GO:0062023	collagen-containing extracellular matrix	PMID:28344315	HDA	cellular_component	taxon:9606	20180727
P04196	HRG	GO:0009986	cell surface	PMID:15220341	IDA	cellular_component	taxon:9606	20170221
P04196	HRG	GO:0016525	negative regulation of angiogenesis	PMID:16436387	IDA	biological_process	taxon:9606	20120601
P04196	HRG	GO:0051838	cytolysis by host of symbiont cells	PMID:18797515	IDA	biological_process	taxon:9606|taxon:5480	20191119
P04196	HRG	GO:2001027	negative regulation of endothelial cell chemotaxis	PMID:16436387	IDA	biological_process	taxon:9606	20120601
P04196	HRG	GO:0015886	heme transport	PMID:21873635	IBA	biological_process	taxon:9606	20170228
P04196	HRG	GO:0070062	extracellular exosome	PMID:23533145	HDA	cellular_component	taxon:9606	20140714
P04196	HRG	GO:0072562	blood microparticle	PMID:22516433	HDA	cellular_component	taxon:9606	20131223
P04196	HRG	GO:0007599	hemostasis	GO_REF:0000043	IEA	biological_process	taxon:9606	20220419
P04196	HRG	GO:0020037	heme binding	PMID:678554	IDA	molecular_function	taxon:9606	20110815
P04196	HRG	GO:0070062	extracellular exosome	PMID:19056867	HDA	cellular_component	taxon:9606	20131024
P04196	HRG	GO:0050730	regulation of peptidyl-tyrosine phosphorylation	PMID:16489009	IDA	biological_process	taxon:9606	20120605
P04196	HRG	GO:0005576	extracellular region	PMID:27068509	HDA	cellular_component	taxon:9606	20180329
P04196	HRG	GO:0043254	regulation of protein-containing complex assembly	PMID:16489009	IDA	biological_process	taxon:9606	20120605
P04196	HRG	GO:0010593	negative regulation of lamellipodium assembly	PMID:16489009	IDA	biological_process	taxon:9606	20120605
P04196	HRG	GO:0005515	protein binding	PMID:19285951	IPI	molecular_function	taxon:9606	20110815
P04196	HRG	GO:0008201	heparin binding	PMID:21304106	IDA	molecular_function	taxon:9606	20110815
P04196	HRG	GO:0005515	protein binding	PMID:21304106	IPI	molecular_function	taxon:9606	20110815
P04196	HRG	GO:0061844	antimicrobial humoral immune response mediated by antimicrobial peptide	PMID:18797515	IDA	biological_process	taxon:9606	20170329
P04196	HRG	GO:0005576	extracellular region	PMID:14718574	NAS	cellular_component	taxon:9606	20040416
P04196	HRG	GO:0005576	extracellular region	Reactome:R-HSA-158721	TAS	cellular_component	taxon:9606	20130516
P04196	HRG	GO:0050832	defense response to fungus	PMID:18797515	IDA	biological_process	taxon:9606|taxon:5476	20170329
P04196	HRG	GO:2001027	negative regulation of endothelial cell chemotaxis	PMID:16489009	IDA	biological_process	taxon:9606	20120605
P04196	HRG	GO:0008201	heparin binding	PMID:16436387	IDA	molecular_function	taxon:9606	20120601
P04196	HRG	GO:0010543	regulation of platelet activation	PMID:21873635	IBA	biological_process	taxon:9606	20170228
P05154	SERPINA5	GO:0002020	protease binding	PMID:8665956	IPI	molecular_function	taxon:9606	20150609
P05154	SERPINA5	GO:0070062	extracellular exosome	PMID:19056867	HDA	cellular_component	taxon:9606	20131024
P05154	SERPINA5	GO:0005615	extracellular space	GO_REF:0000002	IEA	cellular_component	taxon:9606	20220419
P05154	SERPINA5	GO:0002020	protease binding	PMID:7521127	IPI	molecular_function	taxon:9606	20111010
P05154	SERPINA5	GO:0062023	collagen-containing extracellular matrix	PMID:28327460	HDA	cellular_component	taxon:9606	20181003
P05154	SERPINA5	GO:0002020	protease binding	PMID:6323392	IPI	molecular_function	taxon:9606	20111010
P05154	SERPINA5	GO:0036027	protein C inhibitor-PLAU complex	PMID:3501295	IDA	cellular_component	taxon:9606	20111102
P05154	SERPINA5	GO:0010466	negative regulation of peptidase activity	GO_REF:0000043	IEA	biological_process	taxon:9606	20220419
P05154	SERPINA5	GO:0004867	serine-type endopeptidase inhibitor activity	PMID:10340997	IDA	molecular_function	taxon:9606	20111010
P05154	SERPINA5	GO:0032991	protein-containing complex	PMID:7521127	IDA	cellular_component	taxon:9606	20060712
P05154	SERPINA5	GO:0002080	acrosomal membrane	PMID:9510955	IDA	cellular_component	taxon:9606	20111010
P05154	SERPINA5	GO:0005615	extracellular space	GO_REF:0000044	IEA	cellular_component	taxon:9606	20220419
P05154	SERPINA5	GO:0002020	protease binding	PMID:14696115	IPI	molecular_function	taxon:9606	20111010
P05154	SERPINA5	GO:0004867	serine-type endopeptidase inhibitor activity	PMID:7521127	IDA	molecular_function	taxon:9606	20060712
P05154	SERPINA5	GO:0007283	spermatogenesis	GO_REF:0000107	IEA	biological_process	taxon:9606	20220419
P05154	SERPINA5	GO:0005515	protein binding	PMID:7521127	IPI	molecular_function	taxon:9606	20191219
P05154	SERPINA5	GO:0032991	protein-containing complex	PMID:8665956	IDA	cellular_component	taxon:9606	20150605
P05154	SERPINA5	GO:0031094	platelet dense tubular network	PMID:9556620	IDA	cellular_component	taxon:9606	20111010
P05154	SERPINA5	GO:0036024	protein C inhibitor-TMPRSS7 complex	PMID:15853774	IDA	cellular_component	taxon:9606	20111102
P05154	SERPINA5	GO:0004867	serine-type endopeptidase inhibitor activity	PMID:1725227	IDA	molecular_function	taxon:9606	20111010
P05154	SERPINA5	GO:0007342	fusion of sperm to egg plasma membrane involved in single fertilization	PMID:9510955	NAS	biological_process	taxon:9606	20060712
P05154	SERPINA5	GO:0007283	spermatogenesis	GO_REF:0000024	ISS	biological_process	taxon:9606	20060712
P05154	SERPINA5	GO:0004867	serine-type endopeptidase inhibitor activity	PMID:9556620	IDA	molecular_function	taxon:9606	20111010
P05154	SERPINA5	GO:0004867	serine-type endopeptidase inhibitor activity	PMID:15853774	IDA	molecular_function	taxon:9606	20111010
P05154	SERPINA5	GO:0009897	external side of plasma membrane	PMID:9556620	IDA	cellular_component	taxon:9606	20111010
P05154	SERPINA5	GO:0002020	protease binding	PMID:1725227	IPI	molecular_function	taxon:9606	20111010
P05154	SERPINA5	GO:0004867	serine-type endopeptidase inhibitor activity	PMID:21873635	IBA	molecular_function	taxon:9606	20211215
P05154	SERPINA5	GO:0070062	extracellular exosome	PMID:21557262	IDA	cellular_component	taxon:9606	20140708
P05154	SERPINA5	GO:0005515	protein binding	PMID:8665956	IPI	molecular_function	taxon:9606	20150609
P05154	SERPINA5	GO:0004867	serine-type endopeptidase inhibitor activity	PMID:3501295	IDA	molecular_function	taxon:9606	20111010
P05154	SERPINA5	GO:0002020	protease binding	PMID:2844223	IPI	molecular_function	taxon:9606	20111010
P05154	SERPINA5	GO:0010951	negative regulation of endopeptidase activity	PMID:21873635	IBA	biological_process	taxon:9606	20210217
P05154	SERPINA5	GO:0002020	protease binding	PMID:3501295	IPI	molecular_function	taxon:9606	20111010
P05154	SERPINA5	GO:0051346	negative regulation of hydrolase activity	PMID:8665956	IMP	biological_process	taxon:9606	20150605
P05154	SERPINA5	GO:0036027	protein C inhibitor-PLAU complex	PMID:10340997	IDA	cellular_component	taxon:9606	20111102
P05154	SERPINA5	GO:0005615	extracellular space	PMID:10340997	IDA	cellular_component	taxon:9606	20111010
P05154	SERPINA5	GO:0016020	membrane	PMID:7521127	IDA	cellular_component	taxon:9606	20060712
P05154	SERPINA5	GO:0005615	extracellular space	PMID:21873635	IBA	cellular_component	taxon:9606	20211110
P05154	SERPINA5	GO:0002080	acrosomal membrane	PMID:7521127	IDA	cellular_component	taxon:9606	20111010
P05154	SERPINA5	GO:0036026	protein C inhibitor-PLAT complex	PMID:10340997	IDA	cellular_component	taxon:9606	20111102
P05154	SERPINA5	GO:0004867	serine-type endopeptidase inhibitor activity	PMID:2844223	IDA	molecular_function	taxon:9606	20111010
P05154	SERPINA5	GO:0005576	extracellular region	PMID:14718574	NAS	cellular_component	taxon:9606	20040422
P05154	SERPINA5	GO:0070062	extracellular exosome	PMID:23533145	HDA	cellular_component	taxon:9606	20140714
P05154	SERPINA5	GO:0004867	serine-type endopeptidase inhibitor activity	PMID:8536714	IDA	molecular_function	taxon:9606	20111010
P05154	SERPINA5	GO:0004867	serine-type endopeptidase inhibitor activity	GO_REF:0000043	IEA	molecular_function	taxon:9606	20220419
P05154	SERPINA5	GO:0002020	protease binding	PMID:9556620	IPI	molecular_function	taxon:9606	20111010
P05154	SERPINA5	GO:0031091	platelet alpha granule	PMID:9556620	IDA	cellular_component	taxon:9606	20111010
P05154	SERPINA5	GO:0006869	lipid transport	GO_REF:0000043	IEA	biological_process	taxon:9606	20220419
P05154	SERPINA5	GO:0002020	protease binding	PMID:15853774	IPI	molecular_function	taxon:9606	20081117
P05154	SERPINA5	GO:0005576	extracellular region	Reactome:R-HSA-5591086	TAS	cellular_component	taxon:9606	20140611
P05154	SERPINA5	GO:0005515	protein binding	PMID:8665956	IPI	molecular_function	taxon:9606	20150605
P05154	SERPINA5	GO:0008201	heparin binding	PMID:11120760	TAS	molecular_function	taxon:9606	20060712
P05154	SERPINA5	GO:0031210	phosphatidylcholine binding	PMID:9556620	IDA	molecular_function	taxon:9606	20111010
P05154	SERPINA5	GO:0036030	protein C inhibitor-plasma kallikrein complex	PMID:8536714	IDA	cellular_component	taxon:9606	20111102
P05154	SERPINA5	GO:0097182	protein C inhibitor-coagulation factor Xa complex	PMID:6323392	IDA	cellular_component	taxon:9606	20111102
P05154	SERPINA5	GO:0005615	extracellular space	PMID:8665956	IDA	cellular_component	taxon:9606	20150605
P05154	SERPINA5	GO:0036025	protein C inhibitor-TMPRSS11E complex	PMID:15328353	IDA	cellular_component	taxon:9606	20111102
P05154	SERPINA5	GO:0001972	retinoic acid binding	PMID:11722589	IDA	molecular_function	taxon:9606	20111010
P05154	SERPINA5	GO:0005615	extracellular space	PMID:1725227	IDA	cellular_component	taxon:9606	20111010
P05154	SERPINA5	GO:0036029	protein C inhibitor-KLK3 complex	PMID:1725227	IDA	cellular_component	taxon:9606	20111102
P05154	SERPINA5	GO:0002020	protease binding	PMID:10340997	IPI	molecular_function	taxon:9606	20111010
P05154	SERPINA5	GO:0005515	protein binding	PMID:24388360	IPI	molecular_function	taxon:9606	20220423
P05154	SERPINA5	GO:0005576	extracellular region	PMID:11120760	TAS	cellular_component	taxon:9606	20060712
P05154	SERPINA5	GO:0097181	protein C inhibitor-coagulation factor V complex	PMID:6323392	IDA	cellular_component	taxon:9606	20111102
P05154	SERPINA5	GO:0004867	serine-type endopeptidase inhibitor activity	PMID:9510955	IDA	molecular_function	taxon:9606	20111010
P05154	SERPINA5	GO:0036030	protein C inhibitor-plasma kallikrein complex	PMID:2844223	IDA	cellular_component	taxon:9606	20111102
P05154	SERPINA5	GO:0005576	extracellular region	GO_REF:0000043	IEA	cellular_component	taxon:9606	20220419
P05154	SERPINA5	GO:0036027	protein C inhibitor-PLAU complex	PMID:8536714	IDA	cellular_component	taxon:9606	20111102
P05154	SERPINA5	GO:0032190	acrosin binding	PMID:7521127	IPI	molecular_function	taxon:9606	20060906
P05154	SERPINA5	GO:0005539	glycosaminoglycan binding	PMID:8796266	TAS	molecular_function	taxon:9606	20060712
P05154	SERPINA5	GO:0036028	protein C inhibitor-thrombin complex	PMID:6323392	IDA	cellular_component	taxon:9606	20111102
P05154	SERPINA5	GO:0097183	protein C inhibitor-coagulation factor XI complex	PMID:2844223	IDA	cellular_component	taxon:9606	20111102
P05154	SERPINA5	GO:0004867	serine-type endopeptidase inhibitor activity	PMID:6323392	IDA	molecular_function	taxon:9606	20111005
P05154	SERPINA5	GO:0005615	extracellular space	PMID:8536714	IDA	cellular_component	taxon:9606	20111010
P05154	SERPINA5	GO:0030414	peptidase inhibitor activity	GO_REF:0000043	IEA	molecular_function	taxon:9606	20220419
P05154	SERPINA5	GO:0007338	single fertilization	GO_REF:0000043	IEA	biological_process	taxon:9606	20220419
P05154	SERPINA5	GO:0004867	serine-type endopeptidase inhibitor activity	GO_REF:0000002	IEA	molecular_function	taxon:9606	20220419
P05154	SERPINA5	GO:0008201	heparin binding	GO_REF:0000043	IEA	molecular_function	taxon:9606	20220419

## Sheet: Secondary classification of GO
Ontology	name	Go ID	Count	Proteins
biological_process	cellular process	GO:0050875	15	P02787;P01011;P19827;P02743;P33151;P00450;P02765;P02748;O75882;Q96PD5;P05452;P00738;P43251;P04196;P05154
biological_process	biological regulation	GO:0065007	14	P02787;P19827;P01011;P02743;P33151;P00450;P02748;P02765;O75882;Q96PD5;P05452;P00738;P04196;P05154
biological_process	regulation of biological process	GO:0050791	13	P02787;P19827;P01011;P02743;P33151;P02748;P02765;O75882;Q96PD5;P05452;P00738;P04196;P05154
biological_process	metabolic process	GO:0044710	12	P02787;P19827;P01011;P02743;P33151;P02765;Q96PD5;P05452;P00738;P43251;P04196;P05154
biological_process	response to stimulus	GO:0051869	12	P02787;P01011;P35542;P02743;P33151;P02765;P02748;O75882;Q96PD5;P05452;P00738;P04196
biological_process	multicellular organismal process	GO:0050874	11	P02787;P01011;P02743;P33151;P02765;O75882;Q96PD5;P05452;P43251;P04196;P05154
biological_process	developmental process	GO:0044767	10	P02787;P02743;P33151;P02765;O75882;Q96PD5;P05452;P43251;P04196;P05154
biological_process	negative regulation of biological process	GO:0048519	9	P00738;P01011;P19827;P02743;P04196;P33151;P02765;Q96PD5;P05154
biological_process	positive regulation of biological process	GO:0048518	7	P05452;P00738;P02787;P04196;P33151;P02765;P02748
biological_process	localization	GO:1902578	7	P02787;P04196;P33151;P02765;P00450;O75882;P05154
biological_process	immune system process	GO:0002376	6	P00738;P02787;P02743;P04196;P02748;Q96PD5
biological_process	biological process involved in interspecies interaction between organisms	GO:0044419	6	P00738;P02787;P04196;P02743;P02748;Q96PD5
biological_process	signaling	GO:0044700	4	P02787;P04196;P33151;P02765
biological_process	locomotion	GO:0040011	4	P02787;P04196;P33151;O75882
biological_process	biological adhesion	GO:0022610	3	P33151;P04196;O75882
biological_process	biomineralization	GO:0110148	2	P05452;P02765
biological_process	growth	GO:0048590	2	P04196;O75882
biological_process	reproduction	GO:0050876	1	P05154
biological_process	pigmentation	GO:0043473	1	O75882
biological_process	detoxification	GO:0098754	1	P00738
biological_process	reproductive process	GO:0044702	1	P05154
biological_process	viral process	GO:0022415	1	P02743
cellular_component	cellular anatomical entity	GO:0110165	16	P35542;P02743;P33151;O75882;P05154;P02787;P01011;P19827;P02748;P02765;P00450;Q96PD5;P05452;P00738;P43251;P04196
cellular_component	protein-containing complex	GO:0043234	6	P00738;P02787;P35542;P33151;P02748;P05154
molecular_function	binding	GO:0005488	14	P02787;P01011;P19827;P35542;P02743;P33151;P00450;P02748;O75882;Q96PD5;P05452;P00738;P04196;P05154
molecular_function	molecular function regulator	GO:0098772	5	P01011;P19827;P04196;P02765;P05154
molecular_function	catalytic activity	GO:0003824	4	P00738;P43251;P00450;Q96PD5
molecular_function	molecular transducer activity	GO:0060089	2	O75882;Q96PD5
molecular_function	molecular carrier activity	GO:0140104	1	P02787
molecular_function	antioxidant activity	GO:0016209	1	P00738
