# Supplementary material for: Linoleic acid promotes TF expression through PPAR-α, which leads to tumor progression in primary pulmonary lymphoepithelioma-like carcinoma
Source: Research Square preprint supplement (doi:10.21203/rs.3.rs-5704972/v1), 2025-01-10
Supplement: Supplementary file 6 [file 4cf1446717796f3bfb139c4e.xlsx]

## Sheet: Sheet1
Supplementary Table 11.Significant negaitve metabolites information the CON and pLELC group.																																				Supplementary Table 11.Significant negative metabolites information the pLELC and CON group.
Index	Formula	Compounds	Class I	Class II	Precursor (g/mol)	Mass (g/mol)	RT (min)	Adduct	error_ppm	MS_level	score	source	CAS	Pubchem CID	HMDB	Metlin	cpd_ID	CON1	CON2	CON3	CON4	CON5	CON6	CON7	CON8	CON9	CON10	pLELC1	pLELC2	pLELC3	pLELC4	pLELC5	pLELC6	pLELC7	pLELC8	pLELC9	pLELC10	pLELC11	pLELC12	pLELC13	pLELC14	pLELC15	QC01	QC02	QC03	kegg_map	neg_pLELC_vs_CON_VIP	neg_pLELC_vs_CON_P-value	neg_pLELC_vs_CON_Fold_Change
MW0125795	C6H6N2O	Nicotinamide	Alcohol and amines	Amines	121.044	122.048	1.2955	M-H	10.227	MS2-Search-DB	0.6849	rp	98-92-0	936	HMDB0001406	1497	C00153	18020.6	95079.2	77110.4	1103.98	28025	21832.9	45096	34279.2	96990	83973.9	53223.5	43612.6	187908	187753	202009	241827	155853	152792	177899	191818	232374	168721	184626	270017	142829	152527	152500	150587	ko00760,ko01100,ko01240,ko04977	1.75423	1.82401e-06	3.44726
MW0146874	C2HBrClN	Bromochloroacetonitrile	Others	Others	187.863	154.896	13.6116	M+Cl	8.20586	MS2-Insilico	0.7054	rp	83463-62-1	55004	-	-	C19353	269791	241544	236124	221752	227922	250505	225393	243258	273748	177428	302858	179845	388617	395026	345263	404061	391077	1.34956e+06	451762	454399	372681	433976	462355	1.01935e+06	285959	439833	467424	471987	--	1.74972	0.00703168	2.03784
MW0110020	C2HCl3O2	Trichloroacetic acid	Organic acid And Its derivatives	Organic acid And Its derivatives	161.914	161.904	11.3047	M-	22.5587	MS2-Search-DB	0.5944	rp	76-03-9	6421	HMDB0042048	-	C11150	2.92307e+06	478397	158817	2.81364e+06	478745	173484	537316	750079	1.11206e+06	1.22488e+06	451063	435162	1.66122e+07	2.01784e+07	8.06672e+06	7.88224e+06	3.28885e+07	7.94762e+06	7.23582e+06	3.46562e+06	6.04376e+06	6.64979e+06	7.08931e+06	4.66875e+06	5.33002e+06	741937	713017	706909	ko00980,ko05207	1.94841	0.00262404	8.44688
MW0102977	C20H24O3	Triptophenolide	Terpenoids	Ditepenoids	311.168	312.173	10.9574	M-H	8.93135	MS2-Search-DB	0.8815	rp	74285-86-2	173273	-	44381	-	8.92034e+06	1.08862e+06	435809	1.9964e+06	948088	7.38791e+06	5.59426e+06	8.05508e+06	3.12819e+07	887759	2.07849e+07	1.80587e+07	8.86394e+06	4.88762e+07	8.82223e+06	2.0964e+07	4.60949e+07	1.99309e+07	1.92412e+07	4.00386e+07	1.66846e+07	7.48261e+06	5.20663e+07	7.33767e+06	1.53317e+07	5.49077e+06	5.39108e+06	5.39803e+06	--	1.78973	0.00269883	3.5095
MW0009887	C13H7Cl4NO2	Tetrachlorosalicylanilide	Benzene and substituted derivatives	Phenolics	347.918	350.92	2.9451	M-H	6.74587	MS2-Search-DB	0.6214	rp	7426-07-5	124579	-	-	C11274	2.26538e+06	2.36196e+06	1.00166e+06	2.3699e+06	2.40478e+06	2.37287e+06	2.12047e+06	2.36404e+06	2.22247e+06	1.12122e+06	1.06161e+06	930338	1.22606e+06	1.18729e+06	843145	915304	984693	960225	1.0261e+06	967484	990428	929333	1.11982e+06	981944	1.01404e+06	606920	605637	602935	--	2.15399	0.000138449	0.489784
MW0115671	CH3Br	Bromomethane	Others	Hydrocarbon derivatives	186.884	93.9418	12.2638	2M-H	22.8933	MS2-Insilico	0.6181	rp	74-83-9	6323	HMDB0031524	-	C18447	21545.6	20516	307975	322272	321534	40299.7	301763	469194	334471	360682	353470	338999	534207	783739	413213	605596	575711	573468	576240	616173	466385	527726	641253	559070	580995	739946	790391	782489	--	1.62963	0.000163171	2.17211
MW0107334	C6H9N3O2	L-Histidine	Amino acid and Its metabolites	Amino acids	176.044	155.07	0.7126	M+Na-2H	1	MS2-MetDNA	0.8016	rp	71-00-1	6274	HMDB0000177	-	C00135	2934.98	1109.79	1847.22	7613.88	1364.66	387.173	6013.84	3577.1	7262.17	7668.5	6778.4	8662.46	5929.79	10123.2	11454.4	13196.3	15050.6	12483	10596.7	10680.2	11520.4	8515.25	10529.4	11447.2	4499.61	10645.7	10612.2	10287.6	ko00340,ko00410,ko00970,ko01100,ko01230,ko02010,ko04974,ko05230	1.85175	4.67544e-05	2.53845
MW0159685	C10H17N3O6S	Glutathione	Amino acid and Its metabolites	Amino acid derivatives	306.084	307.084	4.9378	M-H	18.7316	MS2-Search-DB	0.7812	rp	70-18-8	124886	HMDB0062697	44	C02471	2.73314e+06	2.72047e+06	2.64648e+06	2.77052e+06	2.67626e+06	2.73141e+06	2.63193e+06	2.54465e+06	2.59353e+06	1.24365e+06	1.28407e+06	1.18383e+06	1.27598e+06	1.2311e+06	1.13943e+06	1.10009e+06	1.1494e+06	1.0914e+06	1.0656e+06	1.09658e+06	1.04685e+06	2.2173e+06	1.16598e+06	994714	1.04187e+06	838911	840150	840192	--	2.26928	1.20536e-06	0.476676
MW0061062	C19H26N2S	Pergolide	Others	Medicine	313.169	314.182	10.9574	M-H	13.7901	MS2-Search-DB	0.7138	rp	66104-22-1	47811	HMDB0015317	1787	C07425	430602	82922.9	28851.4	190908	67504.2	458225	67583.5	258741	2.17456e+06	1.14248e+06	1.47146e+06	1.14515e+06	1.03484e+06	3.20815e+06	487292	1.32486e+06	2.88264e+06	586901	613087	2.36153e+06	1.19421e+06	834935	3.43347e+06	463819	949991	316285	295333	278726	--	1.73661	0.00821016	2.9907
MW0054374	C18H32O2	Linoleic acid	FA	FFA	315.208	280.24	10.8375	M+Cl	3	MS2-MetDNA	0.9453	rp	60-33-3	5280450	HMDB0000673	-	C01595	1838.35	1097.82	829.729	10929.5	5668.52	2299.47	2279.84	8606.11	1365.57	1945.59	14768.6	1340.55	10760.8	4143.77	6896.45	6001.39	2125.35	6675.12	12897.6	4213.29	3653.75	17085.7	10576.3	5371.25	7518.06	7090.12	7324.32	7420.86	ko00591,ko01040,ko01100	1.28062	0.0257278	2.06233
MEDP1130	C20H30O2	5,6-dehydroarachidonic acid	FA	Oxidized lipids	301.217	302.225	10.2793	M-H	0.0353906	MS2-Search-Local	0.7166	rp	58688-54-3	6443815	-	-	-	244298	101246	31997.4	137063	139946	146748	329642	202490	79283.3	41694.5	366166	57711.6	210406	420174	172421	577663	142285	602317	121512	1.66632e+06	255990	205995	740551	438302	181638	209569	209458	210553	--	1.39586	0.0252017	2.82335
MEDN1129	C4H8O4	Erythrose	Carbohydrates and Its metabolites	Sugars	141.017	120.042	0.7126	M+Na-2H	0.853205	MS2-Search-Local	0.9613	rp	583-50-6	94176	HMDB0002649	-	C01796	597092	550884	492877	1.47691e+06	386528	106706	1.17236e+06	1.13472e+06	867952	1.97987e+06	2.06746e+06	1.5599e+06	1.00295e+06	2.10906e+06	1.81033e+06	2.42679e+06	2.5245e+06	2.46521e+06	2.07222e+06	2.00519e+06	2.53695e+06	1.14677e+06	2.12164e+06	2.58465e+06	1.34004e+06	2.39247e+06	2.34151e+06	2.33663e+06	--	1.79675	9.92319e-05	2.26435
MEDN0381	C16H32O2	FFA(16:0)	FA	FFA	255.233	256.24	11.3047	M-H	1.04037	MS2-Search-Local	0.9289	rp	57-10-3	-	HMDB0000220	-	C00249	557558	96416	27102	447.481	680232	597149	689731	1.10965e+06	567360	947465	923108	551220	2.07753e+06	664988	976962	1.14542e+06	513595	2.07031e+06	1.40355e+06	629727	928832	1.53926e+06	844028	640608	1.02269e+06	1.25407e+06	1.25448e+06	1.26413e+06	ko00061,ko00062,ko00071,ko01040,ko01100,ko01212	1.12241	0.00614748	2.01422
MW0114388	C17H26O4	Embelin	Aldehyde,Ketones,Esters	Ketones	293.179	294.183	11.1806	M-H	8.35861	MS2-Search-DB	0.8324	rp	550-24-3	3218	-	43201	C10342	258928	28245.9	255445	206817	5810.04	43838.9	201497	222773	423925	245828	583819	655965	436814	1.14906e+06	777412	842938	1.98927e+06	715719	1.00684e+06	934563	593810	603552	930726	473469	1.01239e+06	470642	463655	471038	--	1.92117	6.95002e-06	4.4746
MW0054192	C15H10O6	Kaempferol	Flavonoids	Flavonoid	285.034	286.048	5.1197	M-H	16.485	MS2-Search-DB	0.6619	rp	520-18-3	5280863	HMDB0005801	-	C05903	382276	353153	389750	372027	369984	356486	376245	162682	314707	174498	187363	160226	150676	170264	161716	165194	165702	157833	145998	145045	78218.9	148862	150214	119524	132333	105359	105144	106028	ko01100	2.11848	8.08911e-05	0.459061
MW0114051	C17H18Cl3NO3	Celastramycin A	Heterocyclic compounds	Heterocyclic compounds	388.029	389.035	0.7126	M-H	5.90524	MS2-Search-DB	0.5191	rp	491600-94-3	10157237	-	-	-	242.354	153.008	58732.6	148842	78273.2	80170.6	47613.9	84422.6	91571.1	181548	6086.6	149202	55978.8	276924	260938	320614	336279	268780	195409	189239	320708	194879	136311	311799	135849	308224	310831	304601	--	1.24906	0.000341697	2.7295
FDATN01282	C15H18N2O9	uridine triacetate	Others	FDA	369.098	370.101	3.2676	M-H	10.2237	MS2-Search-Local	0.6989	rp	4105-38-8	20058	-	-	-	86695.3	54846.4	35551.1	75995.2	121939	153517	75039.8	64996	44112.8	89871.9	89175.1	130844	425563	183076	195857	293755	115632	143532	170468	198447	308717	147630	112248	57834.3	118258	132364	132444	131324	--	1.7471	0.00182689	2.23536
MW0144865	C6H12O5	L-Rhamnose	Carbohydrates and Its metabolites	Sugars	201.026	164.069	0.7043	M+K-2H	21.2822	MS2-Search-Local	0.8574	rp	3615-41-6	25310	HMDB0000849	-	C00507	5623.15	34858	3447.81	155191	16604.6	69946.8	85039.2	50405.9	47880.1	6494.06	107102	146414	96169.6	112700	212278	178038	220655	135446	119833	177203	221818	88808.3	168130	155277	111286	118386	116098	115363	ko00051,ko01100	1.87738	3.23751e-05	3.15626
MW0117410	C13H14BrN3O	2-(2-(4-Bromophenyl)-6-methylpyrimidin-4-ylamino)ethanol	Heterocyclic compounds	Heterocyclic compounds	306.026	307.032	0.7126	M-H	5.5558	MS2-Search-DB	0.7137	rp	330981-72-1	5332859	-	64774	-	70194.7	57867.5	91802.7	81754.2	53978	54689	70569.1	50133	503.767	96378.3	113307	136239	47031.8	164977	158457	183340	193476	151257	117436	87929.5	195784	107046	112692	195429	60938.3	180216	177148	175664	--	1.17777	8.30546e-05	2.15049
MW0104776	C5H8O5	2-Hydroxyglutaric acid	Organic acid And Its derivatives	Organic acid And Its derivatives	147.026	148.037	1.1839	M-H	10.25	MS2-MetDNA	0.5839	rp	2889-31-8	43	HMDB0000606	-	C02630	9192.3	24723.2	5438.75	4889.87	19993.8	29817.8	14676.1	7673.53	6152.52	4168.42	1319.96	3006.28	1626.25	22939.1	798.214	1791.93	6526.25	12568.4	5155.43	1314.93	5754.97	4553.83	6079.94	4461.05	4688.74	3554.44	3496.39	3492.13	ko00650,ko01100	1.28444	0.0456135	0.434454
MW0004918	C18H30O3S	4-Dodecylbenzenesulfonic Acid	Benzene and substituted derivatives	Benzene and substituted derivatives	325.184	326.192	11.2054	M-H	0.90247	MS2-Search-Local	0.6868	rp	27176-87-0	25457	HMDB0059915	-	-	1.77675e+07	1.7315e+06	1.72348e+07	3.49251e+07	392176	7.51892e+06	1.21768e+07	5.27346e+07	2.1448e+07	2.36046e+07	3.58601e+07	2.45364e+07	2.34445e+07	6.39096e+07	3.01848e+07	3.4556e+07	7.00789e+07	3.13394e+07	3.41398e+07	5.13792e+07	2.44696e+07	3.14148e+07	7.1526e+07	2.82068e+07	4.2889e+07	9.69571e+06	9.69615e+06	9.61621e+06	--	1.43988	0.00467362	2.10318
MW0009478	C25H27N5	Piperidine,4-(5H-dibenzo[a,d]cyclohepten-5-ylidene)-1-[4-(2H-tetrazol-5-yl)butyl]-	Benzene and substituted derivatives	Benzene and substituted derivatives	397.226	397.227	11.1972	M-	4.05274	MS2-Search-DB	0.709	rp	162640-98-4	11741525	-	45472	-	55849.9	5783.73	82869.6	2744.22	7238.48	17324.1	9078.73	51666.1	64089.8	6224.43	112292	147059	140203	704855	253828	183736	150418	280577	295807	169027	196349	208725	301908	167186	257882	122174	120093	116646	--	2.17817	5.40986e-05	7.85785
MW0004398	C8H8O2S	4-(Methylthio)benzoic acid	Benzene and substituted derivatives	Benzene and substituted derivatives	335.049	168.024	0.9193	2M-H	18.3062	MS2-Search-DB	0.6269	rp	13205-48-6	83230	-	2538	-	37588.8	36867.9	38431.8	34664.8	45098.1	44888.5	16305.4	33163.1	17889.8	27255.5	9043.87	37218.6	145027	93717.7	49135.9	54597.6	73495.7	111439	35604.5	43811.8	122170	60662.3	31284.3	99410.3	96323	53932.9	53995.4	53597.7	--	1.37077	0.00236039	2.13343
MW0052943	C32H47F5O3S	Fulvestrant	Benzene and substituted derivatives	Benzene and substituted derivatives	605.32	606.317	8.1957	M-H	19.5927	MS2-Search-DB	0.6198	rp	129453-61-8	104741	-	45325	D01161	148011	143502	111368	144446	148505	138007	138312	112388	188958	134982	158059	452590	595256	189423	215377	508735	134517	707482	159280	88078.1	224750	242326	158183	297058	181589	176361	174765	175702	--	1.48396	0.0092386	2.04131
MW0062178	C19H38O2	Pristanic acid	Terpenoids	Ditepenoids	297.279	298.287	11.131	M-H	1	MS2-MetDNA	0.848	rp	1189-37-3	123929	HMDB0000795	5760	-	80324.2	10978.9	89470.8	73903.4	193.502	4178.23	97053.1	103990	603.35	196460	158000	138088	157931	140162	145533	185559	159804	165655	161289	138690	144504	130190	109585	137110	149231	178059	178101	178681	--	1.45109	0.00241676	2.25348
MW0137957	C9H10O4	Dihydrocaffeic Acid	Organic acid And Its derivatives	Organic acid And Its derivatives	217.031	182.058	0.8035	M+Cl	8.99469	MS2-Search-DB	0.5859	rp	1078-61-1	348154	HMDB0000423	3789	C10447	167755	174226	542621	47217.8	45380.7	144946	234005	312333	124005	469718	354645	186593	462072	885301	588399	476936	351266	534073	412751	544585	434260	518837	736453	521970	500873	545317	540315	540029	ko00350	1.74282	0.000691072	2.21289
MEDN1266	C27H46NO7P	LPE(22:5/0:0)	GP	LPE	526.294	527.301	7.8029	M-H	9.03352	MS2-Search-Local	0.5119	rp	-	-	-	-	-	38747.1	57064	17836.9	29483	36666.1	66955.8	123358	41989.4	50384.1	6688.92	181296	18282.2	75194.6	172260	29982.4	252764	31042.2	137340	24944.6	533509	75503.9	71011.3	261789	282853	112309	79753.3	80084	79757.9	--	1.30295	0.0131451	3.21144
MW0151470	C27H47N5O10	Ile-Ile-Glu-Glu-Val	Amino acid and Its metabolites	Small Peptide	600.331	601.332	7.683	M-H	9.2844	MS2-Search-DB	0.6535	rp	-	-	-	264787	-	143419	475161	90972.4	153489	139753	160493	272900	166944	194033	142732	723258	154316	274193	550635	152634	898121	124062	489744	122182	1.85137e+06	262853	274603	841690	1.02693e+06	187539	288712	287866	287856	--	1.31759	0.0187357	2.72665
MW0007271	C16H15ClO6	Griseophenone B	Benzene and substituted derivatives	Benzene and substituted derivatives	390.058	338.056	4.9378	M+Cl+NH3	17.1286	MS2-Search-DB	0.6576	rp	-	23872096	-	-	C18837	533209	536705	516552	509944	478778	513084	530095	227717	527398	228158	244095	208901	456797	375460	173292	165590	348779	171102	149535	174926	132135	327261	196866	150735	155917	207296	187380	206582	--	1.74614	0.000133095	0.497126
MW0144506	C16H27N5O8	Ala-Asn-Val-Asp	Amino acid and Its metabolites	Small Peptide	416.178	417.186	1.2996	M-H	0.764512	MS2-Search-DB	0.7007	rp	-	-	-	108222	-	131413	39486.1	11222.6	110707	249129	391678	50304.9	129348	74523	175592	204629	365946	631585	295182	649449	454046	190114	335355	159927	290774	874195	302119	68072.7	14199	106595	218561	216414	218791	--	1.12688	0.0128847	2.41659
MW0122488	C18H24N4O2	7-hydroxygranisetron	Benzene and substituted derivatives	Benzene and substituted derivatives	327.184	328.19	11.2054	M-H	5.8526	MS2-Insilico	0.8264	rp	-	25271976	HMDB0061062	-	-	519363	67406.3	542043	62806.5	17179.2	225367	673129	1.74337e+06	799283	779605	1.15448e+06	884667	945474	2.57475e+06	1.1425e+06	1.39926e+06	3.4679e+06	1.27964e+06	1.77669e+06	2.37078e+06	1.30964e+06	1.23645e+06	2.76549e+06	927804	1.97945e+06	440215	440425	435363	--	1.6978	0.000225495	3.09602
MW0142981	C35H36MgN4O6	3-Hydroxyethylchlorophyllide a	Heterocyclic compounds	Heterocyclic compounds	631.24	632.249	6.5915	M-H	3.07679	MS2-Insilico	0.7207	rp	-	46174059	-	-	C18154	549791	1.16884e+06	913298	743196	739157	2.03971e+06	795321	554730	962544	542356	470433	393099	236439	483568	412491	266570	246272	590464	657877	288740	297214	1.33018e+06	501132	117912	217135	257249	256378	256111	ko00860	1.6218	0.0113096	0.481709
MEDN1229	C6H6O4	2-Oxo-2,3-dihydrofuran-5-acetate	Organic acid And Its derivatives	Esters	142.02	142.027	0.7126	M-	15.6925	MS2-Search-Local	0.7081	rp	-	104	-	-	C03586	29724.1	24303.9	19481.2	72686.8	16532	12190.4	52087.5	47300.4	34721.3	32806.7	86742.3	68557.5	60919.3	95281.5	78280	103245	109110	101992	90829.4	95115.5	106860	46763.1	92063	105154	60555.4	101776	99846	99687.8	ko01100	2.13005	1.26847e-06	2.5382
MW0104394	C6H3Cl3O5	2,3,5-Trichloromaleylacetate	Organic acid And Its derivatives	Organic acid And Its derivatives	296.856	259.905	13.0907	M+K-2H	7.28882	MS2-Insilico	0.5284	rp	-	9543107	HMDB0060361	-	C18243	2.63231e+06	1.82457e+06	2.32511e+06	2.53155e+06	2.48025e+06	378346	1.64271e+06	387473	880980	395818	820481	871092	462446	1.62976e+06	757402	814922	727807	801532	707092	315311	746578	263390	754809	737549	717806	459990	487205	508386	--	1.00799	0.0266986	0.479268
MW0011221	C28H46O4	(3beta,5alpha,6beta,7alpha,22E,24R)-Ergosta-8,22-diene-3,5,6,7-tetrol	Alcohol and amines	Alcohols	445.332	446.34	10.9905	M-H	2.30487	MS2-Insilico	0.8479	rp	-	131751259	HMDB0032107	-	-	267461	28857.6	282608	38740.7	25071.1	13966.9	429032	81280.3	558168	202044	454436	436909	212099	1.30363e+06	398610	359184	214752	261389	402667	71947.1	338270	1.73093e+06	502848	568205	499171	349252	305707	338732	--	1.45101	0.0188592	2.68262
[truncated: 2 more columns]
