# Supplementary material for: Linoleic acid promotes TF expression through PPAR-α, which leads to tumor progression in primary pulmonary lymphoepithelioma-like carcinoma
Source: Research Square preprint supplement (doi:10.21203/rs.3.rs-5704972/v1), 2025-01-10
Supplement: Supplementary file 7 [file 585850661fd66e47ce2a3005.xlsx]

## Sheet: Sheet1
Supplementary Table 10.Negaitve metabolites information the CON and pLELC group.
Index	Formula	Compounds	Class I	Class II	MS_level	score	CAS	CON1	CON2	CON3	CON4	CON5	CON6	CON7	CON8	CON9	CON10	pLELC1	pLELC2	pLELC3	pLELC4	pLELC5	pLELC6	pLELC7	pLELC8	pLELC9	pLELC10	pLELC11	pLELC12	pLELC13	pLELC14	pLELC15	VIP	P-value	Fold_Change	Log2FC	Type
MW0125795	C6H6N2O	Nicotinamide	Alcohol and amines	Amines	MS2-Search-DB	0.6849	98-92-0	18020.6	95079.2	77110.4	1103.98	28025	21832.9	45096	34279.2	96990	83973.9	53223.5	43612.6	187908	187753	202009	241827	155853	152792	177899	191818	232374	168721	184626	270017	142829	1.75423	1.82401e-06	3.44726	1.78545	up
MEDN1166	C6H6O4S	4-hydroxybenzenesulfonic acid	Organic acid And Its derivatives	Sulfonic acids	MS2-Search-Local	0.9337	98-67-9	7.08199e+06	1.55748e+07	1.56265e+07	1.02333e+07	2.81581e+07	7.46894e+06	4.76665e+06	1.984e+07	6.93832e+06	2.38552e+07	1.04367e+07	3.74701e+06	6.73694e+07	1.42302e+07	1.29256e+07	7.3331e+06	8.02762e+07	8.26877e+07	1.46004e+07	5.31503e+06	1.09788e+07	3.53345e+06	2.45808e+06	2.51716e+06	1.91854e+06	0.0493442	0.364739	1.53035	0.613865	insig
MW0014871	C19H30O5S	5alpha-Androstan-3beta-ol-17-one sulfate	Aldehyde,Ketones,Esters	Esters	MS2-Search-DB	0.9038	977-35-5	368733	326776	98744.7	481166	25700.3	13925.8	132748	231049	357950	168163	239679	41706.4	1.37508e+06	241925	134006	173314	644182	326247	525259	235423	347431	121976	173084	144073	375216	0.851401	0.237854	1.54156	0.62439	insig
MEDN1426	C18H34O5	9(S),12(S),13(S)-TriHOME	FA	Oxidized lipids	MS2-Search-Local	0.7282	97134-11-7	60575.3	147272	128656	52527.4	59710.9	85504.3	59972.6	59050	65010.6	55065	69334.8	75571.9	67457.1	70029.2	71171.1	81056.3	144722	66541.9	63775.1	83783.6	102484	82081.9	84359.7	82384.4	79556	0.439477	0.72166	1.05542	0.0778231	insig
MW0127412	C12H6Cl4O2S	Bithionol	Others	Others	MS2-Search-DB	0.6355	97-18-7	2.4954e+06	2.39662e+06	4.84629e+06	2.48752e+06	1.79637e+06	1.56247e+06	4.91341e+06	4.65848e+06	4.92868e+06	1.34286e+06	1.97825e+06	2.12916e+06	1.93365e+06	4.01262e+06	4.13838e+06	4.15113e+06	3.71662e+06	1.93691e+06	3.87341e+06	3.92097e+06	2.32164e+06	1.37168e+06	3.75328e+06	1.65731e+06	1.88228e+06	0.0810609	0.605882	0.907411	-0.140172	insig
MW0002223	C7H10N2	2,4-Diaminotoluene	Benzene and substituted derivatives	Benzene and substituted derivatives	MS2-Insilico	0.8819	95-80-7	189495	234228	203389	238475	209724	189157	266805	202531	224357	199885	254153	188092	233612	213672	198495	236209	213765	213210	211285	153622	241710	243958	205102	148560	231960	0.144627	0.77019	0.984657	-0.0223068	insig
MW0009497	C29H27F3N6O	Ponatinib	Benzene and substituted derivatives	Benzene and substituted derivatives	MS2-Search-Local	0.6151	943319-70-8	90478.4	184695	268708	68640.6	172088	181631	60318.2	76069.7	255003	50812.6	33031	130844	1.56663e+06	78702.5	286772	106641	523372	80905.9	47858.8	167187	1.48235e+06	46030.8	215911	49928.9	39271.4	0.383632	0.188574	2.29825	1.20054	insig
MW0142288	C20H38O2	2-cis Eicosenoic Acid	FA	FFA	MS2-Search-DB	0.8882	93772-82-8	829969	1.81849e+06	615058	196593	1.28346e+06	984794	1.12213e+06	1.8674e+06	1.11873e+06	437762	779309	681165	234091	983060	920600	870261	1.26152e+06	384707	1.12229e+06	1.76745e+06	475735	991007	1.59322e+06	1.25981e+06	575081	0.266979	0.629312	0.901875	-0.149	insig
MW0141975	C6H2Cl4O	2,3,5,6-Tetrachlorophenol	Benzene and substituted derivatives	Phenolics	MS2-Insilico	0.6215	935-95-5	985806	1.05723e+06	1.92156e+06	309134	752892	866235	2.1036e+06	849985	979671	1.25989e+06	3.50165e+06	932827	608178	543755	798118	1.0084e+06	192014	838767	80792.6	799955	1.14777e+06	2.19504e+06	894772	106318	1.77219e+06	0.597293	0.780471	0.927327	-0.108849	insig
MW0149148	C9H7Cl3O3	Fenoprop	Benzene and substituted derivatives	Benzene and substituted derivatives	MS2-Insilico	0.5143	93-72-1	1.44296e+06	1.3944e+06	1.28577e+06	1.29552e+06	372171	1.12885e+06	1.30466e+06	1.2594e+06	1.39412e+06	1.28748e+06	1.35099e+06	1.21321e+06	967075	1.04464e+06	1.16394e+06	944792	2.09057e+06	3.12936e+06	938894	2.22977e+06	960314	1.18495e+06	1.12568e+06	2.89759e+06	998662	0.537335	0.227607	1.21879	0.285449	insig
MW0063246	C28H56NO7P	Pyrrolidinium,1-[(7R)-7-(acetyloxy)-4-hydroxy-4-oxido-3,5,9-trioxa-4-phosphapentacos-1-yl]-1-methyl-,inner salt	Others	Others	MS2-Search-DB	0.6126	91021-63-5	63006.2	130118	159271	92765.2	121195	129997	59669	102611	228689	72529	215772	321747	189830	100609	128370	172106	135505	115427	118386	192106	108920	114460	89542	87457.5	118503	0.798764	0.184681	1.26956	0.344323	insig
MW0124448	C8H5NO2	Isatin	Heterocyclic compounds	Indole and Its derivatives	MS2-Search-Local	0.7235	91-56-5	278253	248587	233768	586358	464377	248211	84443.3	406814	286313	1.14181e+06	203849	241735	239293	546365	456667	78458.7	553497	493986	305342	426455	293033	116704	391415	1.04211e+06	161425	0.0513553	0.80712	0.929955	-0.104768	insig
MW0109526	C21H28N2O5	Ramiprilat	Amino acid and Its metabolites	Amino acid derivatives	MS2-Search-DB	0.6023	87269-97-4	72378.9	80495.2	59130.8	126864	16845.4	7691.16	58848.1	106044	118030	61128.9	51133.4	10053.1	125016	280367	262649	57058.6	139949	89590.8	278164	37099.7	164516	147468	26728	65208.5	448614	0.787251	0.0420205	2.05771	1.04104	insig
MW0009355	C6HCl5O	Pentachlorophenol	Benzene and substituted derivatives	Phenolics	MS2-Search-DB	0.7204	87-86-5	692881	634242	897183	732574	867134	2.03737e+06	1.32851e+06	753084	719191	830843	701993	369528	349919	629153	2.49857e+06	402470	403510	595697	414993	2.07074e+06	600654	724443	1.28564e+06	970735	2.59145e+06	0.483403	0.919918	1.02598	0.0370067	insig
MW0013469	C12H16O5	3-Carboxy-4-methyl-5-propyl-2-furanpropionic acid	Organic acid And Its derivatives	Organic acid And Its derivatives	MS2-Search-DB	0.8719	86879-39-2	1.59093e+06	1.27603e+06	1.04381e+06	1.08753e+06	2.04706e+06	1.98701e+06	3.32508e+06	3.22074e+06	235806	158680	4.97633e+06	51950.1	1.03711e+06	8.54751e+06	690801	1.90689e+06	2.62218e+06	6.91484e+06	2.5193e+06	9.51662e+06	2.39083e+06	163910	6.19951e+06	4.28252e+06	1.8894e+06	0.618391	0.0315326	2.24173	1.16461	insig
MEDL02498	C8H12N2O2	Pyridoxamine	Heterocyclic compounds	Heterocyclic compounds	MS2-Search-DB	0.5063	85-87-0	1.62409e+06	1.6984e+06	1.53745e+06	1.68752e+06	1.54003e+06	1.59891e+06	1.45138e+06	1.56221e+06	1.46688e+06	1.29392e+06	1.39455e+06	1.39437e+06	1.67751e+06	1.65247e+06	1.31627e+06	1.33985e+06	1.45646e+06	1.44441e+06	1.40236e+06	1.34141e+06	1.66404e+06	1.55887e+06	1.52494e+06	1.30833e+06	1.38509e+06	0.743622	0.0943508	0.942639	-0.0852232	insig
MW0146874	C2HBrClN	Bromochloroacetonitrile	Others	Others	MS2-Insilico	0.7054	83463-62-1	269791	241544	236124	221752	227922	250505	225393	243258	273748	177428	302858	179845	388617	395026	345263	404061	391077	1.34956e+06	451762	454399	372681	433976	462355	1.01935e+06	285959	1.74972	0.00703168	2.03784	1.02704	up
MW0117082	C11H11NO2	3-Indolepropionic Acid	Organic acid And Its derivatives	Organic acid And Its derivatives	MS2-Search-Local	0.5697	830-96-6	562596	514877	523747	450397	478127	519945	524135	492027	933970	446704	539334	677444	520952	494033	438575	585538	716974	525292	562573	453435	519294	580245	479462	770386	509399	0.225114	0.794631	1.02487	0.0354347	insig
MW0133702	C10H10O3	4-Methoxycinnamic Acid	Organic acid And Its derivatives	Organic acid And Its derivatives	MS2-Search-Local	0.6995	830-09-1	473888	572904	124266	425692	288082	339142	272628	696162	201556	231704	413967	253306	62753.4	665697	102347	259655	175781	204903	869456	1.22345e+06	187301	128717	100153	14099.1	286748	0.687293	0.755721	0.909782	-0.136408	insig
MEDN0109	C24H40O4	Hyodeoxycholic acid	Bile acids	Bile acids	MS2-Search-Local	0.915	83-49-8	10320.3	190375	38086	56002.4	123885	12740.3	15165.9	21256.6	568741	2879.55	36626.5	333845	38868.9	16140.3	230812	5548.03	1.60005e+06	427499	4376.63	9161.19	99281.5	64108.5	128106	8882.54	25147.4	0.312794	0.419427	1.94234	0.957796	insig
MW0169041	C24H40O4	Deoxycholic Acid	Bile acids	Bile acids	MS2-MetDNA	0.7802	83-44-3	58730.8	75852.8	15432.6	56051.6	206103	118122	20784.6	135963	422532	8453.94	128598	131979	135918	39072.6	471664	21461.1	1.04494e+06	205396	73625.3	29233.5	100911	75834.8	61640.4	41811.6	68887.9	0.4587	0.430014	1.56882	0.649678	insig
MW0154030	C14H24O2	Myristic Acid Alkyne	FA	Others	MS2-Search-DB	0.7644	82909-47-5	965842	139548	43802.9	362918	360209	376423	626397	382337	75436.4	98544	204982	101794	449939	220681	309314	283899	68638.9	896454	322400	82984.5	246230	587318	145603	153087	338775	0.00895339	0.651441	0.857187	-0.222319	insig
MW0063746	C26H45NO7S	Taurocholate	Bile acids	Bile acids	MS2-MetDNA	0.8225	81-24-3	43345.5	46671.4	68355.3	29420.8	35364.8	1547.67	2833.09	752.408	9535.29	14130.9	419.065	75966	293191	120622	20754.7	14347.6	217.301	29523.1	2242.38	28638.9	628032	38256.8	129990	27203.8	10381.5	0.592052	0.132214	3.75668	1.90946	insig
MW0143813	C6H12O5	6-Deoxy-D-glucose	Carbohydrates and Its metabolites	Sugars	MS2-Search-Local	0.7311	7658-08-4	402528	396396	443531	413334	417595	426350	403601	401518	385706	440111	396229	467553	409783	433588	469787	464405	466769	489447	511754	469920	475202	611127	505158	523208	493968	1.61713	0.000191316	1.16009	0.214232	insig
MEDN1148	C16H32O3	2-hydroxyhexadecanoic acid	FA	FFA	MS2-Search-Local	0.8971	764-67-0	344372	695356	604978	375324	513192	526517	539574	417853	334549	303912	339632	294211	568165	490674	441758	438480	296469	459215	422411	302427	445601	431474	392515	384164	343916	0.540456	0.197056	0.866494	-0.206738	insig
MW0110020	C2HCl3O2	Trichloroacetic acid	Organic acid And Its derivatives	Organic acid And Its derivatives	MS2-Search-DB	0.5944	76-03-9	2.92307e+06	478397	158817	2.81364e+06	478745	173484	537316	750079	1.11206e+06	1.22488e+06	451063	435162	1.66122e+07	2.01784e+07	8.06672e+06	7.88224e+06	3.28885e+07	7.94762e+06	7.23582e+06	3.46562e+06	6.04376e+06	6.64979e+06	7.08931e+06	4.66875e+06	5.33002e+06	1.94841	0.00262404	8.44688	3.07842	up
MW0127063	C2H7AsO2	Cacodylic acid	Organic acid And Its derivatives	Organic acid And Its derivatives	MS2-Search-DB	0.5777	75-60-5	2.43379e+06	2.37673e+06	2.40575e+06	2.25514e+06	2.16353e+06	2.17975e+06	2.36227e+06	2.44772e+06	2.58308e+06	2.52923e+06	2.46434e+06	2.38657e+06	1.71554e+06	1.93964e+06	895244	2.00782e+06	1.90968e+06	2.10182e+06	638196	2.26428e+06	2.0706e+06	2.27756e+06	2.25176e+06	2.38554e+06	1.01685e+06	1.00869	0.00651452	0.795536	-0.330002	insig
MW0012931	C26H54NO7P	1-O-Hexadecyl-2-O-acetyl-sn-glyceryl-3-phosphorylcholine	GP	PC	MS2-Search-DB	0.7564	74389-68-7	1.77734e+06	1.52486e+06	1.6963e+06	1.2218e+06	1.35111e+06	1.41894e+06	1.48804e+06	1.57459e+06	1.74246e+06	1.93269e+06	1.37108e+06	1.9795e+06	1.43042e+06	1.56155e+06	1.99638e+06	1.94491e+06	2.11853e+06	1.85011e+06	1.83983e+06	1.74691e+06	1.56193e+06	1.58757e+06	1.61753e+06	2.20689e+06	1.96788e+06	0.993156	0.0355096	1.13516	0.182901	insig
MW0102977	C20H24O3	Triptophenolide	Terpenoids	Ditepenoids	MS2-Search-DB	0.8815	74285-86-2	8.92034e+06	1.08862e+06	435809	1.9964e+06	948088	7.38791e+06	5.59426e+06	8.05508e+06	3.12819e+07	887759	2.07849e+07	1.80587e+07	8.86394e+06	4.88762e+07	8.82223e+06	2.0964e+07	4.60949e+07	1.99309e+07	1.92412e+07	4.00386e+07	1.66846e+07	7.48261e+06	5.20663e+07	7.33767e+06	1.53317e+07	1.78973	0.00269883	3.5095	1.81126	up
MW0009887	C13H7Cl4NO2	Tetrachlorosalicylanilide	Benzene and substituted derivatives	Phenolics	MS2-Search-DB	0.6214	7426-07-5	2.26538e+06	2.36196e+06	1.00166e+06	2.3699e+06	2.40478e+06	2.37287e+06	2.12047e+06	2.36404e+06	2.22247e+06	1.12122e+06	1.06161e+06	930338	1.22606e+06	1.18729e+06	843145	915304	984693	960225	1.0261e+06	967484	990428	929333	1.11982e+06	981944	1.01404e+06	2.15399	0.000138449	0.489784	-1.02978	down
MW0119481	C7H4BrN3O2	3-bromo-7-Nitroindazole	Heterocyclic compounds	Heterocyclic compounds	MS2-Search-DB	0.637	74209-34-0	1.82608e+06	1.27673e+06	1.4377e+06	1.35917e+06	1.45285e+06	1.56793e+06	1.70835e+06	1.50213e+06	1.36272e+06	1.47686e+06	1.40286e+06	1.55498e+06	1.76371e+06	1.4059e+06	1.62915e+06	1.47423e+06	1.4989e+06	1.56007e+06	1.54232e+06	1.51507e+06	1.5776e+06	1.44297e+06	440394	1.40694e+06	1.45162e+06	0.374759	0.574726	0.964861	-0.0516069	insig
MW0105267	C13H26O3	4-Oxatetradecanoic acid	Organic acid And Its derivatives	Organic acid And Its derivatives	MS2-Search-DB	0.7167	7420-16-8	170044	202125	210198	168222	225024	228286	250124	227189	271040	195049	257672	239648	228123	214046	222557	221890	268057	254696	209449	243259	226924	224954	215092	256095	246980	0.979212	0.0936756	1.09578	0.131953	insig
MW0115671	CH3Br	Bromomethane	Others	Hydrocarbon derivatives	MS2-Insilico	0.6181	74-83-9	21545.6	20516	307975	322272	321534	40299.7	301763	469194	334471	360682	353470	338999	534207	783739	413213	605596	575711	573468	576240	616173	466385	527726	641253	559070	580995	1.62963	0.000163171	2.17211	1.1191	up
MEDL00680	C12H20N4OS	CMPentylF	Organic acid And Its derivatives	Organic acid And Its derivatives	MS2-Search-Local	0.8338	73248-95-0	1.06208e+06	734688	386669	647483	869107	981041	644847	1.0279e+06	465299	256405	522366	181975	677815	755764	151675	391219	661061	848140	741727	491715	370863	287738	971982	777884	578629	0.573601	0.194451	0.792455	-0.335598	insig
MW0107334	C6H9N3O2	L-Histidine	Amino acid and Its metabolites	Amino acids	MS2-MetDNA	0.8016	71-00-1	2934.98	1109.79	1847.22	7613.88	1364.66	387.173	6013.84	3577.1	7262.17	7668.5	6778.4	8662.46	5929.79	10123.2	11454.4	13196.3	15050.6	12483	10596.7	10680.2	11520.4	8515.25	10529.4	11447.2	4499.61	1.85175	4.67544e-05	2.53845	1.34395	up
MW0137461	C20H22O3	Avobenzone	Benzene and substituted derivatives	Benzene and substituted derivatives	MS2-Search-Local	0.7405	70356-09-1	261116	194845	6020.84	224796	187884	181602	531926	36091.1	88652.2	106229	220417	69624.2	665679	179542	249552	355781	102619	852267	251292	135818	242288	784553	268167	110685	254169	1.04678	0.104063	1.73796	0.797398	insig
MW0014855	C20H34O2	Sciadonic acid	FA	FFA	MS2-Search-DB	0.6692	7019-85-4	1.04366e+06	1.79807e+06	840430	522926	1.03951e+06	1.05376e+06	744131	1.54224e+06	1.4563e+06	930456	1.02246e+06	839202	836884	1.11749e+06	1.1592e+06	1.45673e+06	1.46581e+06	752716	1.378e+06	1.89493e+06	1.03019e+06	1.31516e+06	1.64657e+06	1.28145e+06	920494	0.466629	0.468944	1.10087	0.138642	insig
MW0159685	C10H17N3O6S	Glutathione	Amino acid and Its metabolites	Amino acid derivatives	MS2-Search-DB	0.7812	70-18-8	2.73314e+06	2.72047e+06	2.64648e+06	2.77052e+06	2.67626e+06	2.73141e+06	2.63193e+06	2.54465e+06	2.59353e+06	1.24365e+06	1.28407e+06	1.18383e+06	1.27598e+06	1.2311e+06	1.13943e+06	1.10009e+06	1.1494e+06	1.0914e+06	1.0656e+06	1.09658e+06	1.04685e+06	2.2173e+06	1.16598e+06	994714	1.04187e+06	2.26928	1.20536e-06	0.476676	-1.06892	down
MEDP2094	C7H9NO	4-Hydroxybenzylamine	Benzene and substituted derivatives	Benzene and substituted derivatives	MS2-Insilico	0.5525	696-60-6	1.76452e+06	1.88166e+06	1.75416e+06	1.87884e+06	1.70807e+06	1.74262e+06	908628	1.6794e+06	1.69197e+06	772501	1.82628e+06	781511	993471	839927	739264	802685	815066	756443	1.642e+06	919903	942895	1.71931e+06	1.76853e+06	673377	935287	1.41629	0.00676149	0.682447	-0.551211	insig
MW0115446	C5H4N4O3	Uric acid	Organic acid And Its derivatives	Organic acid And Its derivatives	MS2-Search-Local	0.9081	69-93-2	2.89794e+07	3.69378e+07	3.14635e+07	2.59711e+07	2.94422e+07	2.45503e+07	2.76645e+07	2.90574e+07	1.01931e+07	9.41024e+06	4.38929e+06	1.89903e+07	5.53691e+07	3.46294e+07	1.62817e+07	1.55601e+07	3.30184e+07	4.35382e+07	3.19953e+07	1.3031e+07	3.2129e+07	2.66853e+07	2.4431e+07	1.74876e+07	2.6276e+07	0.0884775	0.840236	1.03497	0.0495932	insig
MW0142110	C5H4N4O2	Xanthine	Nucleotide And Its metabolites	Nucleotide and Its metabolites	MS2-Search-Local	0.91	69-89-6	303888	533020	207041	401572	425507	414730	312030	230578	369670	301540	228866	417199	461444	577235	387810	408517	447871	403622	436652	235338	387229	268423	284618	297772	303987	0.464597	0.62574	1.05662	0.0794575	insig
MW0122029	C16H10BrN3O2	6-Bromoindirubin-3'-oxime	Heterocyclic compounds	Heterocyclic compounds	MS2-Search-DB	0.7091	667463-62-9	202107	170119	174129	174871	169076	175187	186448	178100	268340	155956	203631	237381	201579	191266	196143	226822	233862	211865	246871	198218	207059	224871	201536	267223	217972	1.4639	0.0128458	1.17429	0.231795	insig
MW0061062	C19H26N2S	Pergolide	Others	Medicine	MS2-Search-DB	0.7138	66104-22-1	430602	82922.9	28851.4	190908	67504.2	458225	67583.5	258741	2.17456e+06	1.14248e+06	1.47146e+06	1.14515e+06	1.03484e+06	3.20815e+06	487292	1.32486e+06	2.88264e+06	586901	613087	2.36153e+06	1.19421e+06	834935	3.43347e+06	463819	949991	1.73661	0.00821016	2.9907	1.58048	up
MW0063780	C19H28O5S	Testosterone sulfate	Hormones and hormone related compounds	Hormones and hormone related compounds	MS2-Search-DB	0.9126	651-45-6	4.26714e+06	5.57974e+06	794605	7.93253e+06	472807	354945	2.10813e+06	2.84307e+06	6.25417e+06	2.8457e+06	4.31005e+06	516393	1.00867e+07	3.35636e+06	1.29635e+06	2.37546e+06	6.69292e+06	5.73241e+06	5.66356e+06	3.40161e+06	2.88041e+06	1.34025e+06	1.83383e+06	2.25653e+06	6.97118e+06	0.599845	0.60077	1.17008	0.226613	insig
MW0152776	C6H12O6	L-Rhamnonate	Organic acid And Its derivatives	Organic acid And Its derivatives	MS2-MetDNA	0.6843	6422-34-0	189517	133574	215842	215171	226428	181499	224261	233348	176263	383535	150137	213480	101447	215336	452288	420294	276159	355234	153855	151823	379514	374187	426517	175076	598064	0.599796	0.0813364	1.35919	0.442749	insig
MW0053750	C26H43NO5	Glycochenodeoxycholic acid	Bile acids	Bile acids	MS2-MetDNA	0.8878	640-79-9	1.31168e+06	1.06185e+06	1.51935e+06	406956	906736	1.20712e+06	318598	480791	1.33603e+06	159351	149634	749686	9.11709e+06	496301	2.02251e+06	546537	3.71725e+06	454278	308452	1.19451e+06	6.9937e+06	245512	1.19498e+06	293437	249311	0.342244	0.192696	2.12308	1.08616	insig
MW0004463	C8H6O6	4,5-Dihydroxybenzene-1,2-dicarboxylic acid	Benzene and substituted derivatives	Benzene and substituted derivatives	MS2-Search-DB	0.5992	63958-66-7	545657	422959	440182	379078	365524	436401	394481	460167	724909	540286	436587	507801	282756	463869	274155	380504	374465	381365	410400	345478	401385	372830	395935	750158	1.18153e+06	0.444857	0.918678	0.985102	-0.0216553	insig
MW0103519	C9H12N3Na3O11P2	Cytidine 5'-diphosphate	Nucleotide And Its metabolites	Nucleotide and Its metabolites	MS2-Search-DB	0.8629	63-38-7	6.63073e+06	6.95035e+06	4.94407e+06	7.95981e+06	6.42852e+06	6.71259e+06	5.49878e+06	5.65813e+06	9.35041e+06	6.07104e+06	8.04057e+06	5.98723e+06	6.61212e+06	6.25623e+06	4.3044e+06	5.5344e+06	6.35049e+06	5.50976e+06	4.50832e+06	3.15459e+06	6.5637e+06	6.95819e+06	3.66171e+06	4.82241e+06	3.83089e+06	0.979716	0.0460048	0.826682	-0.274596	insig
MW0056748	C39H79N2O6P	Palmitoyl sphingomyelin	SL	SM	MS2-Search-DB	0.8695	6254-89-3	7646.98	2105.4	6962.75	14917.5	1174.13	232.61	242.454	291.457	192.092	289.876	1189.51	1923.03	6562.32	7442.56	204.538	8269.32	33527.6	6611.48	1249.6	2457.47	1270.31	5608.89	1954.84	1287.59	140.717	0.837158	0.478924	1.56021	0.641736	insig
MW0049069	C32H46O8	Cucurbitacin B	Aldehyde,Ketones,Esters	Esters	MS2-Search-DB	0.6047	6199-67-3	1.30063e+06	1.3365e+06	1.39802e+06	1.25847e+06	1.1556e+06	1.39324e+06	1.24565e+06	1.23721e+06	1.2075e+06	2.77311e+06	1.30837e+06	1.32405e+06	1.36394e+06	1.2523e+06	1.42805e+06	1.57856e+06	1.40616e+06	1.57381e+06	1.33029e+06	1.39831e+06	3.59772e+06	1.25693e+06	1.03524e+06	1.21109e+06	1.25333e+06	0.201642	0.79364	1.04004	0.0566416	insig
MW0133727	C16H16O9	4-Methylumbelliferyl glucuronide	Heterocyclic compounds	Heterocyclic compounds	MS2-Search-DB	0.7289	6160-80-1	159807	166066	165631	170689	172425	179698	165901	176467	164652	161425	176045	165529	178000	174538	165018	152052	176674	168235	177484	173391	167897	163495	195205	153927	160668	0.222516	0.646587	1.00951	0.0136622	insig
MW0061662	C36H56O11	Phytolaccasaponin G	Terpenoids	Triterpene	MS2-Search-DB	0.6124	60820-94-2	1.2694e+06	1.12104e+06	1.17654e+06	882721	907645	1.20319e+06	1.02191e+06	962598	1.37519e+06	1.1015e+06	1.25352e+06	1.28606e+06	1.17313e+06	1.0399e+06	1.32905e+06	1.51257e+06	1.00973e+06	1.26818e+06	997385	865220	1.13387e+06	886031	925415	869879	1.08426e+06	0.0900786	0.924895	1.00615	0.00883847	insig
MW0141980	C6H3Cl3O2	2,3,6-Trichlorohydroquinone	Benzene and substituted derivatives	Phenolics	MS2-Insilico	0.6223	608-94-6	1.66097e+06	1.359e+06	617729	370805	423604	450759	388996	421128	226809	435777	479185	379522	1.03619e+06	303202	368286	248565	347976	383199	340775	1.40586e+06	319689	314617	798985	1.13313e+06	577974	0.224327	0.684951	0.885013	-0.17623	insig
MW0054374	C18H32O2	Linoleic acid	FA	FFA	MS2-MetDNA	0.9453	60-33-3	1838.35	1097.82	829.729	10929.5	5668.52	2299.47	2279.84	8606.11	1365.57	1945.59	14768.6	1340.55	10760.8	4143.77	6896.45	6001.39	2125.35	6675.12	12897.6	4213.29	3653.75	17085.7	10576.3	5371.25	7518.06	1.28062	0.0257278	2.06233	1.04428	up
MW0005027	C12H5Cl5O	4-Hydroxy-2,2',4',5,5'-pentachlorobiphenyl	Benzene and substituted derivatives	Benzene and substituted derivatives	MS2-Search-DB	0.654	59512-50-4	1.77294e+06	1.81712e+06	1.59031e+06	2.88182e+06	1.7268e+06	4.38694e+06	1.7257e+06	1.69506e+06	1.68211e+06	1.91022e+06	1.42777e+06	4.29569e+06	652592	3.9275e+06	1.19424e+06	1.81284e+06	1.25964e+06	4.24501e+06	1.07807e+06	1.75481e+06	1.13946e+06	1.30707e+06	1.45888e+06	1.08096e+06	2.17555e+06	0.517408	0.640315	0.906446	-0.141707	insig
MW0122746	C8H11N5O3	Acyclovir	Heterocyclic compounds	Heterocyclic compounds	MS2-Search-DB	0.6461	59277-89-3	1.79439e+06	1.10235e+06	1.40383e+06	912130	923941	1.97526e+06	1.32136e+06	2.44501e+06	1.22795e+06	1.11459e+06	1.3158e+06	1.01e+06	1.43825e+06	767124	1.44982e+06	790889	1.6731e+06	936934	1.01343e+06	1.41143e+06	2.0984e+06	1.06878e+06	977075	1.24863e+06	802793	0.762752	0.247674	0.84395	-0.24477	insig
MW0168518	C9H7NO	2-hydroxyquinoline	Aldehyde,Ketones,Esters	Ketones	MS2-Search-DB	0.9309	59-31-4	1.26844e+06	1.45059e+06	1.19066e+06	1.41896e+06	1.34354e+06	1.38714e+06	1.3095e+06	1.26112e+06	1.68526e+06	1.14496e+06	1.42151e+06	1.37986e+06	1.45847e+06	1.56381e+06	1.3368e+06	1.60942e+06	1.3264e+06	1.34662e+06	1.28161e+06	1.63015e+06	1.18755e+06	1.31661e+06	1.53711e+06	1.00375e+06	1.32036e+06	0.436582	0.590887	1.02624	0.0373669	insig
MEDP1130	C20H30O2	5,6-dehydroarachidonic acid	FA	Oxidized lipids	MS2-Search-Local	0.7166	58688-54-3	244298	101246	31997.4	137063	139946	146748	329642	202490	79283.3	41694.5	366166	57711.6	210406	420174	172421	577663	142285	602317	121512	1.66632e+06	255990	205995	740551	438302	181638	1.39586	0.0252017	2.82335	1.49741	up
MW0114197	C4H9O7P	D-Erythrose 4-phosphate	Organic acid And Its derivatives	Organic acid And Its derivatives	MS2-Search-DB	0.5595	585-18-2	415401	1.63111e+06	381857	1.07931e+06	980108	447346	406553	369998	409918	309149	1.05122e+06	413263	384454	310043	494995	397830	342452	352138	356958	368168	379299	311271	221273	322167	284332	1.06575	0.125514	0.62096	-0.687427	insig
MEDN1129	C4H8O4	Erythrose	Carbohydrates and Its metabolites	Sugars	MS2-Search-Local	0.9613	583-50-6	597092	550884	492877	1.47691e+06	386528	106706	1.17236e+06	1.13472e+06	867952	1.97987e+06	2.06746e+06	1.5599e+06	1.00295e+06	2.10906e+06	1.81033e+06	2.42679e+06	2.5245e+06	2.46521e+06	2.07222e+06	2.00519e+06	2.53695e+06	1.14677e+06	2.12164e+06	2.58465e+06	1.34004e+06	1.79675	9.92319e-05	2.26435	1.1791	up
MEDP0179	C9H12N2O6	Uridine	Nucleotide And Its metabolites	Nucleotide and Its metabolites	MS2-Search-Local	0.7246	58-96-8	670524	873202	430266	87336.1	671532	538726	609480	307422	311079	520962	428513	638632	493136	776130	468872	839622	417950	787656	529119	766129	856276	528488	515091	288648	436422	0.701539	0.345424	1.16464	0.219887	insig
MW0106389	C6H12O7	D-Galactonic acid	Carbohydrates and Its metabolites	Carboxylic acids and derivatives	MS2-Search-DB	0.651	576-36-3	3.93747e+06	3.50208e+06	3.58819e+06	2.99295e+06	2.95169e+06	3.34903e+06	3.54068e+06	3.18877e+06	6.03108e+06	2.89617e+06	3.39177e+06	4.57028e+06	3.24165e+06	3.20806e+06	2.77357e+06	3.58368e+06	4.44025e+06	3.05497e+06	3.48996e+06	2.69806e+06	3.04391e+06	3.57838e+06	2.89013e+06	4.63103e+06	2.9562e+06	0.291346	0.635877	0.955245	-0.0660568	insig
MEDN1649	C8H12N2O3	Barbital	Heterocyclic compounds	Heterocyclic compounds	MS2-Search-DB	0.6738	57-44-3	4.35446e+07	4.53081e+07	4.34846e+07	4.60957e+07	4.17815e+07	4.47729e+07	4.22279e+07	4.11724e+07	4.17916e+07	2.33647e+07	4.41741e+07	4.00353e+07	2.42304e+07	1.98825e+07	1.75758e+07	1.77663e+07	2.39294e+07	1.8581e+07	2.04528e+07	2.14668e+07	4.06637e+07	2.19514e+07	2.22701e+07	1.54512e+07	1.71911e+07	1.91523	1.94954e-05	0.589412	-0.762652	insig
MW0052792	C18H36O2	Stearic Acid	FA	FFA	MS2-MetDNA	0.9142	57-11-4	27023.5	80583.1	17745	5238.51	33079	54603.9	41774.9	131198	75660.3	29135.2	22727.8	15433.5	11518.3	20676.5	27149.7	37720.3	47384.8	11306.5	38850.9	80587.2	24112.6	42710.8	58307.6	24164.1	17175.1	0.615116	0.194082	0.644873	-0.632913	insig
MEDN0381	C16H32O2	FFA(16:0)	FA	FFA	MS2-Search-Local	0.9289	57-10-3	557558	96416	27102	447.481	680232	597149	689731	1.10965e+06	567360	947465	923108	551220	2.07753e+06	664988	976962	1.14542e+06	513595	2.07031e+06	1.40355e+06	629727	928832	1.53926e+06	844028	640608	1.02269e+06	1.12241	0.00614748	2.01422	1.01022	up
MW0147758	C21H40N8O6	Kentsin	Amino acid and Its metabolites	Small Peptide	MS2-Search-DB	0.6299	56767-30-7	578161	562258	589536	579449	562792	574414	518052	541443	572140	519921	571766	521869	558244	631017	517598	578450	566563	534685	501374	521254	594760	534381	523020	501746	502990	0.447337	0.223378	0.971713	-0.0413981	insig
MW0115322	C12H19Cl3O8	Sucralose	Carbohydrates and Its metabolites	Sugars	MS2-Search-DB	0.6982	56038-13-2	443178	487359	534866	464114	601688	527649	538182	484201	468505	472770	742257	518938	577525	545340	590907	568510	581975	582560	606117	585361	639761	1.1937e+06	574992	781817	559076	1.33524	0.00677249	1.28074	0.356983	insig
MW0105914	C4H7NO4	L-Aspartic Acid	Amino acid and Its metabolites	Amino acids	MS2-Search-Local	0.7913	56-84-8	46601.6	11925	39673.4	27989.2	30452.3	4909.72	46165.9	35251.7	47218.8	37752.8	49698.8	40547.7	58455.9	64947.2	77666.8	63952.5	73418.8	62408	54212.4	77392.6	52563	59812	56654.4	47229.6	43482.9	1.64816	0.000202586	1.79391	0.843107	insig
MEDN0018	C3H7NO3	L-Serine	Amino acid and Its metabolites	Amino acids	MS2-Search-Local	0.8095	56-45-1	117469	84523	99462.9	83682.4	22664.6	61584.2	84413.2	102509	124444	112626	130531	98261.7	98866	160233	177721	152179	172891	167760	156121	171025	187064	246634	198032	238253	154780	1.77897	1.62188e-05	1.8733	0.905584	insig
MEDL02576	C20H36O2	FFA(20:2)	FA	FFA	MS2-Search-Local	0.8894	5598-38-9	221625	113065	43774.4	246178	295345	201924	331376	204121	91240.7	123840	158678	126449	351618	191405	268504	327021	62880.3	526350	220812	111326	231782	225838	238300	66801.6	159444	0.455785	0.480936	1.16323	0.218141	insig
MW0114388	C17H26O4	Embelin	Aldehyde,Ketones,Esters	Ketones	MS2-Search-DB	0.8324	550-24-3	258928	28245.9	255445	206817	5810.04	43838.9	201497	222773	423925	245828	583819	655965	436814	1.14906e+06	777412	842938	1.98927e+06	715719	1.00684e+06	934563	593810	603552	930726	473469	1.01239e+06	1.92117	6.95002e-06	4.4746	2.16176	up
MEDN0807	C14H28O2	FFA(14:0)	FA	FFA	MS2-Search-Local	0.9282	544-63-8	1.62054e+06	365179	240697	1.50793e+06	1.09659e+06	794745	1.47011e+06	1.20156e+06	462168	643221	909182	467564	2.91365e+06	755756	649420	1.03455e+06	615796	3.51258e+06	966490	521278	830813	1.58066e+06	874311	411503	771133	0.421561	0.529269	1.19218	0.253606	insig
MW0012860	C19H38O4	1-Monopalmitin	GL	MG	MS2-Search-DB	0.6934	542-44-9	222037	452471	610526	257489	294601	193058	261610	633256	496130	446013	580170	508470	452337	300981	320879	599949	444048	226380	577191	330173	515848	332046	230372	365928	286597	0.231792	0.771383	1.04665	0.065773	insig
MW0106668	C2H6O4S	Ethyl sulfate	Others	Others	MS2-Search-DB	0.7516	540-82-9	1.52024e+06	1.14514e+06	1.0849e+06	1.10942e+06	1.37316e+06	1.11889e+06	1.43459e+06	1.05278e+06	1.08417e+06	1.03501e+06	1.06154e+06	1.08956e+06	964633	943337	1.00329e+06	965616	1.05039e+06	898502	868360	901629	1.0215e+06	906849	860947	798741	922919	1.9179	0.00155333	0.794862	-0.331224	insig
MW0014794	C10H9NO3	5-Hydroxyindole-3-acetic acid	Organic acid And Its derivatives	Organic acid And Its derivatives	MS2-Search-Local	0.8101	54-16-0	979705	982419	984776	976213	1.00564e+06	1.0725e+06	989603	1.00541e+06	1.05617e+06	996556	979465	860871	965093	863954	900006	887039	950537	957604	899491	941036	963785	939245	893884	1.24331e+06	880213	1.13694	0.025227	0.93711	-0.0937095	insig
MW0124718	C11H12N2O2	L-Tryptophan	Amino acid and Its metabolites	Amino acids	MS2-Search-Local	0.8546	54-12-6	5.62635e+06	8.73746e+06	5.40338e+06	7.85697e+06	6.97475e+06	6.32052e+06	5.98415e+06	5.86844e+06	8.32052e+06	3.67715e+06	5.83329e+06	6.38651e+06	1.11112e+07	1.00472e+07	5.1877e+06	8.0582e+06	6.24885e+06	6.76146e+06	5.61842e+06	7.59813e+06	6.21529e+06	6.69953e+06	8.05345e+06	3.78818e+06	5.76521e+06	0.534492	0.549665	1.064	0.0895007	insig
MW0010040	C9H12O4	Vanylglycol	Benzene and substituted derivatives	Phenolics	MS2-Search-DB	0.6596	534-82-7	1.43048e+06	1.19098e+06	1.47001e+06	1.42264e+06	1.67798e+06	1.33605e+06	1.39689e+06	1.69831e+06	1.43878e+06	1.26266e+06	1.36909e+06	1.5238e+06	1.53082e+06	878911	1.02615e+06	1.01209e+06	1.00412e+06	1.02382e+06	1.23901e+06	1.05138e+06	907292	1.03214e+06	1.10855e+06	1.18953e+06	1.19065e+06	1.73962	0.000543348	0.795236	-0.330546	insig
MW0114355	C5H8O5	D-Ribono-1,4-Lactone	Carbohydrates and Its metabolites	Sugar acids	MS2-Search-Local	0.6214	5336-08-3	6.30796e+06	6.5204e+06	6.36902e+06	6.37342e+06	5.88645e+06	4.8686e+06	6.57584e+06	6.32676e+06	5.02341e+06	3.60075e+06	2.62795e+06	4.25194e+06	5.52367e+06	5.29428e+06	4.03605e+06	4.21726e+06	5.90014e+06	7.6519e+06	6.88233e+06	4.47425e+06	4.00498e+06	6.90713e+06	3.76207e+06	4.51508e+06	8.25459e+06	0.593748	0.285801	0.902335	-0.148265	insig
MEDL02207	C9H10N2	Myosmine	Heterocyclic compounds	Heterocyclic compounds	MS2-Search-DB	0.7109	532-12-7	1.02059e+06	1.06451e+06	6.59377e+06	173708	1.54511e+06	4.16979e+06	7874.76	2.28679e+06	2.2206e+06	8593.36	953412	7.86692e+06	2.75633e+07	332052	3432.66	5.00907e+06	1.59204e+06	2.51678e+06	5.54878e+06	224333	2.37735e+06	2.13411e+06	102108	1.22529e+06	937592	0.42391	0.31259	2.03885	1.02776	insig
MW0113978	C6H12O6	beta-D-Fructofuranose	Heterocyclic compounds	Heterocyclic compounds	MS2-Search-DB	0.7206	53188-23-1	483727	672507	1.61759e+06	82773	612516	456847	713777	967407	905094	1.1327e+06	988850	540364	1.47393e+06	2.57556e+06	1.66921e+06	1.3923e+06	1.00413e+06	1.61696e+06	1.16222e+06	1.61146e+06	1.27716e+06	1.47631e+06	2.17041e+06	1.54668e+06	1.38426e+06	1.53825	0.00100725	1.90887	0.932719	insig
MW0168468	C21H45O6P	1-Octadecyl Lysophosphatidic Acid	GP	LPA	MS2-Search-DB	0.7209	52977-29-4	119872	124953	46099.6	66351.6	51076.2	95225.5	130710	108838	111899	147608	102302	95320.4	53902.1	132892	125443	148135	84803.9	157939	94211.7	178381	115277	89542.8	130956	201647	99305.3	0.72475	0.185335	1.20354	0.267279	insig
MW0054522	C24H52NO6P	Lyso-PAF C-16	GP	LPC	MS2-Search-DB	0.7698	52691-62-0	298857	312166	282577	226799	267632	356243	263395	217697	296248	304292	343725	413661	286806	340860	392967	323914	271674	350022	266587	363786	410974	234535	196201	173803	300675	0.460728	0.224025	1.10176	0.139805	insig
MW0012817	C19H41O6P	1-Hexadecyl lysophosphatidic acid	GP	LPA	MS2-Search-DB	0.7224	52603-03-9	445585	375999	159997	270872	218986	365205	344455	272743	262680	309569	372909	251927	254331	522118	340764	475013	297601	599511	304131	547737	518592	305955	394538	443635	303769	1.20673	0.027923	1.30697	0.38623	insig
MEDN0670	C13H12O3	(S)-O-Desmethyl Naproxen	Benzene and substituted derivatives	Benzene and substituted derivatives	MS2-Search-Local	0.643	52079-10-4	1.75407e+06	1.36066e+06	2.03176e+06	1.71593e+06	1.75309e+06	1.69306e+06	1.73634e+06	1.79489e+06	1.41751e+06	2.59764e+06	1.40683e+06	2.06747e+06	1.97681e+06	2.14635e+06	2.57795e+06	2.5422e+06	2.60798e+06	2.59438e+06	2.70639e+06	2.65844e+06	2.10655e+06	4.63384e+06	3.47549e+06	2.76258e+06	2.79701e+06	1.56207	0.00116198	1.45843	0.544416	insig
MW0143980	C7H14O2S	7-Mercaptoheptanoic acid	Organic acid And Its derivatives	Organic acid And Its derivatives	MS2-Search-DB	0.7191	52000-32-5	8228.57	6970.85	6932.42	9564.66	13761.1	71206	6378.58	11345.7	6765.58	22768.1	9743.52	19307.4	25758.3	22242.5	11071.7	17880.4	23101.5	8187.98	10254.1	78766.9	17384.5	11154.5	11140.5	81839.7	6460.33	0.715892	0.41971	1.44091	0.526978	insig
MW0054192	C15H10O6	Kaempferol	Flavonoids	Flavonoid	MS2-Search-DB	0.6619	520-18-3	382276	353153	389750	372027	369984	356486	376245	162682	314707	174498	187363	160226	150676	170264	161716	165194	165702	157833	145998	145045	78218.9	148862	150214	119524	132333	2.11848	8.08911e-05	0.459061	-1.12324	down
MW0063745	C26H45NO6S	Taurochenodeoxycholic acid	Bile acids	Bile acids	MS2-Search-Local	0.899	516-35-8	191184	184954	186425	53768.8	139341	83458.1	43299.4	20690.7	83740.6	38738.9	2293.7	29366.5	928272	444049	58615.8	43203.7	37249.7	44650.1	29794.9	177347	1.94993e+06	80670.7	541216	39516.4	58167.6	0.295673	0.177027	2.90194	1.53702	insig
MW0108969	C5H9NO4	O-Acetyl-L-serine	Amino acid and Its metabolites	Amino acid derivatives	MS2-Search-Local	0.6511	5147-00-2	715580	913854	768138	835588	790035	892323	758950	807004	890369	716231	767447	768362	914676	912885	726991	637000	686838	745511	693568	937961	871302	734150	870494	620457	743832	0.381702	0.349756	0.958735	-0.0607967	insig
MW0016357	C40H52O2	Canthaxanthin	Aldehyde,Ketones,Esters	Ketones	MS2-Insilico	0.7179	514-78-3	6.45765e+06	3.14207e+06	3.04491e+06	2.03327e+06	2.4454e+06	2.42116e+06	2.46263e+06	3.04561e+06	3.27196e+06	3.3896e+06	2.55718e+06	3.5688e+06	2.52877e+06	2.61223e+06	3.65115e+06	3.62817e+06	3.62127e+06	3.05541e+06	2.99651e+06	2.93481e+06	2.44462e+06	2.56549e+06	2.73481e+06	6.92093e+06	3.24971e+06	0.130277	0.838746	1.0315	0.0447432	insig
MW0105306	C4H3FN2O2	5-Fluorouracil	Heterocyclic compounds	Heterocyclic compounds	MS2-Search-Local	0.6636	51-21-8	447482	422802	493835	448508	445047	513875	489195	480086	503083	519999	561794	419474	355677	382314	456962	429147	448789	427440	449567	453126	423460	437286	458092	436655	450803	1.32983	0.0258808	0.922293	-0.116703	insig
MW0168774	C20H32O2	Arachidonic Acid	FA	FFA	MS2-MetDNA	0.8973	506-32-1	16583.5	16398.9	10800.2	23141	28768.1	26178.5	61883.6	19350.8	21273.5	21709	22981.5	29966.2	42837.9	49705.5	57833.2	38237.5	24864	72835.1	34645.7	17416.3	45543.4	49142.3	56244.9	36143.1	28490.7	1.52926	0.0142005	1.6441	0.717298	insig
MW0012560	C16H32O3	16-Hydroxyhexadecanoic acid	FA	FFA	MS2-MetDNA	0.7709	506-13-8	85357.8	48236	36527.3	63899	213422	80087.5	216007	219704	45413.2	33067	74405.7	39657.9	75613.3	140986	137563	64626.2	46278.5	100371	50687.8	44273.9	90779.8	87647.1	60665.4	75339.8	53893.9	0.303135	0.310924	0.731347	-0.451371	insig
ZINC24805047	C17H34O2	Heptadecanoic acid	FA	FFA	MS2-MetDNA	0.8624	506-12-7	334983	151948	20084.2	278796	231327	454388	528947	542758	208917	135521	367102	98881	339977	172529	156895	236373	78179.7	538709	235875	126882	187442	256365	161589	101371	221029	0.205372	0.288235	0.757058	-0.401525	insig
MEDN0724	C9H8O4	Acetylsalicylic acid	Organic acid And Its derivatives	Organic acid And Its derivatives	MS2-Search-Local	0.5787	50-78-2	2.90743e+07	2.61261e+07	2.68684e+07	2.35339e+07	2.30495e+07	2.51679e+07	2.50912e+07	2.37341e+07	3.86768e+07	2.19035e+07	2.62349e+07	3.33142e+07	2.40422e+07	2.40627e+07	2.2044e+07	2.74677e+07	3.10058e+07	2.27262e+07	2.57729e+07	2.05094e+07	2.30247e+07	2.63017e+07	2.19787e+07	3.19168e+07	2.18578e+07	0.299019	0.652796	0.968143	-0.0467087	insig
MW0002126	C7H3Cl3O2	2,3,6-Trichlorobenzoic acid	Benzene and substituted derivatives	Benzene and substituted derivatives	MS2-Search-DB	0.6727	50-31-7	1.04342e+06	871896	980690	1.55187e+06	941755	722367	1.2472e+06	1.03346e+06	160059	1.2094e+06	1.33691e+06	1.04596e+06	1.07721e+06	1.04448e+06	1.33074e+06	1.36049e+06	1.21203e+06	1.03119e+06	914405	1.23215e+06	784741	1.02486e+06	1.17224e+06	1.26829e+06	1.32445e+06	0.735227	0.202044	1.17189	0.228832	insig
MW0053971	C21H30O5	Hydrocortisone	Hormones and hormone related compounds	Hormones and hormone related compounds	MS2-Search-DB	0.7245	50-23-7	107899	124736	69795.8	113691	53736.2	14194.1	167853	118939	124777	259876	215512	97409.6	290108	250210	266169	145330	104613	312390	163174	175346	149649	266192	261366	101692	298844	1.43823	0.00479579	1.7874	0.837863	insig
MEDP0319	C10H7NO3	Kynurenic acid	Organic acid And Its derivatives	Organic acid And Its derivatives	MS2-Search-Local	0.6085	492-27-3	774079	541304	556272	544924	554732	779974	553617	763633	563301	701421	531533	525525	512526	433355	520335	506869	542263	527769	499506	599974	511052	503762	480775	615882	487911	1.70278	0.00866065	0.820961	-0.284614	insig
MW0114051	C17H18Cl3NO3	Celastramycin A	Heterocyclic compounds	Heterocyclic compounds	MS2-Search-DB	0.5191	491600-94-3	242.354	153.008	58732.6	148842	78273.2	80170.6	47613.9	84422.6	91571.1	181548	6086.6	149202	55978.8	276924	260938	320614	336279	268780	195409	189239	320708	194879	136311	311799	135849	1.24906	0.000341697	2.7295	1.44864	up
MW0137856	C15H10O4	Daidzein	Flavonoids	Isoflavones	MS2-Search-Local	0.8529	486-66-8	508317	456240	437425	459462	422373	489761	454288	486417	725587	345117	540953	547158	487984	503554	365775	483692	415404	470549	448100	440881	391161	542385	479252	562366	422263	0.0076613	0.885672	0.989411	-0.0153584	insig
MW0124505	C16H12O7	Isorhamnetin	Flavonoids	Flavonols	MS2-Search-DB	0.6605	480-19-3	171205	166796	137160	160562	132355	166025	146324	146213	243045	118724	170892	191320	168978	184832	141937	182104	172346	176490	161983	155576	138987	184882	170043	197973	151371	0.781515	0.358748	1.07013	0.0977892	insig
MW0017038	C24H40O4	Chenodeoxycholic acid	Bile acids	Bile acids	MS2-MetDNA	0.8649	474-25-9	132621	112879	116614	67588.7	117865	85307.7	6277.62	741020	70752.7	31202.2	218416	73840.7	121593	143796	354204	42646.5	878558	65204.3	37427.3	73051.6	178919	55994.3	82562.8	391572	49378.7	0.403562	0.685105	1.24468	0.315775	insig
ZINC239015	C10H12O4	Methyl 2,4-dihydroxy-3,6-dimethylbenzoate	Benzene and substituted derivatives	Benzene and substituted derivatives	MS2-Search-DB	0.7157	4707-47-5	335798	340680	326304	342430	323916	344533	321580	339950	339786	297747	332195	277648	342099	368503	288003	276539	318284	341652	297583	311424	308387	309579	345121	259251	291532	0.825083	0.0378817	0.939368	-0.0902373	insig
MEDN0400	C18H30O2	FFA(18:3)	FA	FFA	MS2-Search-Local	0.9119	463-40-1	1.81479e+07	1.62708e+06	1.32195e+06	9.8537e+06	7.13913e+06	6.41219e+06	9.97765e+06	6.8484e+06	1.95123e+06	3.10465e+06	9.65609e+06	1.24916e+06	5.7833e+06	3.82545e+06	3.04782e+06	9.3234e+06	2.33575e+06	7.43622e+06	1.31484e+07	2.03982e+06	6.96814e+06	5.89983e+06	2.13524e+06	2.77834e+06	8.30587e+06	0.136569	0.586231	0.842903	-0.246561	insig
MW0143827	C26H44O4	6-Ethylchenodeoxycholic acid	Organic acid And Its derivatives	Organic acid And Its derivatives	MS2-Insilico	0.5112	459789-99-2	3.90686e+06	3.7977e+06	3.9022e+06	4.03163e+06	3.91469e+06	4.01534e+06	3.76646e+06	3.92626e+06	3.65954e+06	3.61995e+06	4.12011e+06	1.98726e+06	4.31283e+06	4.40683e+06	4.1714e+06	4.35142e+06	4.35533e+06	4.1735e+06	4.16401e+06	4.39194e+06	4.46465e+06	4.19297e+06	4.31552e+06	4.10574e+06	4.09334e+06	0.557466	0.134785	1.06566	0.0917479	insig
FDATN01106	C8H7NaO4	Sodium dehydroacetate	Others	FDA	MS2-Search-Local	0.6945	4418-26-2	420158	411624	564843	434594	396451	171338	441172	463204	848897	428528	411569	284659	392342	360120	448601	409509	459197	518568	402823	386671	632437	523637	746288	488946	721957	0.358457	0.74302	1.04601	0.0648898	insig
MW0155462	C15H10O2	Phenanthrene-4-carboxylate	Benzene and substituted derivatives	Benzene and substituted derivatives	MS2-MetDNA	0.5678	42156-92-3	173341	161989	163191	141245	135154	156770	157959	145857	245798	145284	154412	210147	155695	149317	130402	163935	216743	152495	160357	130129	151272	170938	132739	218609	140151	0.0391891	0.989386	0.998959	-0.00150297	insig
MW0002546	C17H15ClO4	Fenofibric acid	Benzene and substituted derivatives	Benzene and substituted derivatives	MS2-Search-DB	0.7193	42017-89-0	165442	131355	102366	94810.3	197787	194735	312353	289577	26120	17113	410372	399.531	102541	722114	70435.4	166142	265674	620743	203326	734884	227736	20144	383577	320164	146036	0.323051	0.0578383	1.91265	0.935572	insig
FDATN01282	C15H18N2O9	uridine triacetate	Others	FDA	MS2-Search-Local	0.6989	4105-38-8	86695.3	54846.4	35551.1	75995.2	121939	153517	75039.8	64996	44112.8	89871.9	89175.1	130844	425563	183076	195857	293755	115632	143532	170468	198447	308717	147630	112248	57834.3	118258	1.7471	0.00182689	2.23536	1.16051	up
MW0138944	C10H10O3	Methyl 4-hydroxycinnamate	Aldehyde,Ketones,Esters	Esters	MS2-Search-DB	0.7139	3943-97-3	4.74266e+06	2.84887e+06	2.71392e+06	2.82806e+06	4.70235e+06	2.73521e+06	4.49499e+06	2.68962e+06	2.5672e+06	4.25375e+06	2.79444e+06	2.59541e+06	2.75012e+06	2.82751e+06	4.30976e+06	4.32167e+06	4.50794e+06	4.09353e+06	3.74462e+06	2.75667e+06	2.53382e+06	2.30431e+06	2.46812e+06	2.2244e+06	3.77753e+06	0.37889	0.493964	0.925671	-0.111429	insig
MEDN0380	C16H30O2	FFA(16:1)	FA	FFA	MS2-Search-Local	0.929	373-49-9	3.08275e+06	478212	210738	3.38555e+06	2.49406e+06	1.7787e+06	2.71355e+06	2.22494e+06	417969	577338	1.6874e+06	649085	4.34046e+06	1.30308e+06	1.09357e+06	1.71351e+06	237423	4.8489e+06	2.15992e+06	455446	1.63254e+06	3.19277e+06	1.36852e+06	429206	1.4899e+06	0.182826	0.944127	1.02135	0.0304737	insig
MW0004972	C7H3F4NO2	4-Fluoro-3-nitrobenzotrifluoride	Benzene and substituted derivatives	Benzene and substituted derivatives	MS2-Search-DB	0.669	367-86-2	416229	801809	406038	454543	393866	407128	387651	384855	403695	384073	374541	331888	433397	383129	358116	354338	379794	355917	326693	397264	414665	353207	351619	372069	359110	1.13079	0.101177	0.832716	-0.264104	insig
MEDN0832	C6H14NO8P	D-Glucosamine 6-Phosphate	Carbohydrates and Its metabolites	Phosphate sugars	MS2-Search-Local	0.5187	3616-42-0	2.56753e+06	636410	2.90098e+06	3.27583e+06	2.48564e+06	1.80953e+06	2.42576e+06	3.20614e+06	3.61661e+06	2.35465e+06	3.53599e+06	2.50004e+06	1.53666e+06	1.59995e+06	1.77434e+06	1.79121e+06	1.45772e+06	1.60282e+06	2.19806e+06	1.66932e+06	1.73157e+06	2.34273e+06	1.75771e+06	1.9375e+06	2.19198e+06	0.809484	0.0884819	0.781347	-0.355965	insig
MW0144865	C6H12O5	L-Rhamnose	Carbohydrates and Its metabolites	Sugars	MS2-Search-Local	0.8574	3615-41-6	5623.15	34858	3447.81	155191	16604.6	69946.8	85039.2	50405.9	47880.1	6494.06	107102	146414	96169.6	112700	212278	178038	220655	135446	119833	177203	221818	88808.3	168130	155277	111286	1.87738	3.23751e-05	3.15626	1.65822	up
MW0142011	C6H6O5S	3-Sulfocatechol	Benzene and substituted derivatives	Benzene and substituted derivatives	MS2-Search-Local	0.907	35857-70-6	1.60502e+07	1.98624e+06	368430	2.08137e+06	2.61921e+06	1.56742e+06	218096	1.10534e+06	620779	555415	1.30745e+06	756573	992085	1.27969e+06	174519	365705	520295	106076	2.52202e+06	185783	1.89918e+06	440109	734357	3.05837e+06	131225	0.828569	0.277824	0.3551	-1.4937	insig
MW0012956	C44H80NO8P	1-Palmitoyl-2-arachidonoyl-sn-glycero-3-phosphocholine	GP	PC	MS2-Search-DB	0.7961	35418-58-7	638.872	5675.11	133250	99516.8	38581.1	106687	28630.2	17989.9	18725	16062.7	13105.1	17591.8	15473.9	26198.2	14620.8	19941.3	58590.1	2729.33	70038.5	64177.9	26386	68746.7	26046.2	17180.6	29538.3	0.0231933	0.366626	0.673263	-0.570759	insig
MW0151235	C34H48O8	Huratoxin	Aldehyde,Ketones,Esters	Ketones	MS2-Insilico	0.6385	33465-16-6	617153	652533	598493	578232	563093	723569	713353	538370	681283	526807	696256	646511	640777	615421	795319	945079	721187	790832	711281	668369	617937	775590	602546	657417	623638	1.23222	0.0215277	1.13121	0.177864	insig
MW0002028	C8H7NO3	2-(Formylamino)Benzoic Acid	Benzene and substituted derivatives	Benzene and substituted derivatives	MS2-MetDNA	0.9074	3342-77-6	195766	134917	72970.9	179573	338404	76241.2	29365.8	95584.1	63602	237489	53523.7	182139	131327	121623	114241	41085.7	129988	237311	156901	105670	76370.8	36156.1	78096.3	139535	106627	0.218776	0.409683	0.800888	-0.320327	insig
MW0117410	C13H14BrN3O	2-(2-(4-Bromophenyl)-6-methylpyrimidin-4-ylamino)ethanol	Heterocyclic compounds	Heterocyclic compounds	MS2-Search-DB	0.7137	330981-72-1	70194.7	57867.5	91802.7	81754.2	53978	54689	70569.1	50133	503.767	96378.3	113307	136239	47031.8	164977	158457	183340	193476	151257	117436	87929.5	195784	107046	112692	195429	60938.3	1.17777	8.30546e-05	2.15049	1.10466	up
MW0105263	C6H6NO6P	4-Nitrophenyl phosphate	Aldehyde,Ketones,Esters	Esters	MS2-Search-DB	0.7038	330-13-2	1.93628e+06	1.61156e+06	2.61229e+06	2.98548e+06	1.1835e+06	1.50662e+06	1.56204e+06	1.1255e+06	1.68079e+06	1.83407e+06	2.543e+06	2.33401e+06	1.4951e+06	5.74566e+06	3.59696e+06	1.36093e+06	1.09555e+06	1.08859e+06	953453	1.44906e+06	1.21831e+06	1.14678e+06	1.29183e+06	1.08836e+06	1.02536e+06	0.216723	0.948752	1.01389	0.0198985	insig
MW0114174	C5H10O6	D-Arabinonic acid	Organic acid And Its derivatives	Organic acid And Its derivatives	MS2-Search-DB	0.6912	32609-14-6	1.50621e+07	6.96497e+06	6.17192e+06	7.06992e+06	6.06623e+06	6.12697e+06	5.71177e+06	1.07915e+07	7.38393e+06	5.39807e+06	7.22959e+06	5.93824e+06	6.31068e+06	6.00974e+06	4.45753e+06	5.4684e+06	5.37525e+06	4.88311e+06	5.01849e+06	8.73987e+06	5.86264e+06	6.13075e+06	5.09192e+06	4.93018e+06	4.80562e+06	1.24116	0.0796574	0.749228	-0.416523	insig
MW0168532	C6H8O5	2-Oxoadipic Acid	Organic acid And Its derivatives	Organic acid And Its derivatives	MS2-Search-Local	0.7865	3184-35-8	867635	878859	855441	902636	940374	929240	847958	857081	901532	748328	811214	869018	890136	760074	815575	729980	812636	717148	768584	770514	844630	698382	769505	728022	689059	1.60594	0.000544906	0.891615	-0.165507	insig
MW0004846	C7H7ClN2O4S	4-Chloro-5-sulfamoylanthranilic acid	Benzene and substituted derivatives	Benzene and substituted derivatives	MS2-Search-DB	0.7036	3086-91-7	1.34924e+06	844093	804453	650269	649528	615835	840693	924478	1.33105e+06	1.07352e+06	777859	768589	744694	427155	1.06709e+06	1.47641e+06	421428	452362	827424	753604	723097	1.09434e+06	805146	1.08204e+06	791041	0.574493	0.407349	0.89633	-0.157897	insig
MW0007798	C9H11BrN2O2	Metobromuron	Benzene and substituted derivatives	Benzene and substituted derivatives	MS2-Search-DB	0.6412	3060-89-7	299345	199418	197130	207708	211870	316524	385319	189860	199747	326954	384498	326256	363994	208108	199207	385112	211128	203829	201215	325239	205072	400351	210152	266230	390015	0.387965	0.317722	1.12618	0.17144	insig
MW0158047	C2H4Cl3O4P	Triclofos	Organic acid And Its derivatives	Phosphoric acids	MS2-Insilico	0.6734	306-52-5	551407	484586	535965	384438	300568	254716	604549	1.56516e+06	447534	1.11463e+06	1.31306e+06	277080	241047	253389	271415	1.81376e+06	342757	275978	1.58446e+06	420445	342105	457942	470276	1.49309e+06	456674	0.231925	0.82615	1.06921	0.0965415	insig
MEDP0316	C9H10O4	Homovanillic Acid	Organic acid And Its derivatives	Organic acid And Its derivatives	MS2-Search-Local	0.514	306-08-1	487062	1.0313e+06	976033	1.06803e+06	1.03502e+06	475661	1.0857e+06	559577	484670	440055	1.12179e+06	445560	500300	441467	426142	460074	464531	439200	427192	546094	516787	510864	546011	576712	1.13779e+06	1.08587	0.0977207	0.746688	-0.421423	insig
MEDN0374	C18H32O4	(±)9-HpODE	FA	Oxidized lipids	MS2-Search-Local	0.6501	29774-12-7	50955.6	62043	234522	228010	60537	64669.7	64517.6	135031	247527	53866.7	66767.4	60506.6	135701	243995	64888	63463.3	275309	67457.4	63920.7	68079.1	74032.6	71248.9	145027	65244.8	63054.2	0.0647933	0.576254	0.848088	-0.237715	insig
MW0006219	C17H12F9NO3S	N-[4-(1,1,1,3,3,3-Hexafluoro-2-hydroxypropan-2-yl)phenyl]-N-(2,2,2-trifluoroethyl)benzenesulfonamide	Benzene and substituted derivatives	Benzene and substituted derivatives	MS2-Search-DB	0.6873	293754-55-9	451305	552718	646228	528488	651157	564145	427881	649914	499450	556289	423040	560054	854100	808909	568036	355286	659550	606798	435429	826357	661641	389416	532082	435060	537324	0.23228	0.623901	1.04363	0.0616045	insig
MW0153424	C7H14NO4PS2	Mecarphon	Aldehyde,Ketones,Esters	Esters	MS2-Insilico	0.5237	29173-31-7	3.09881e+06	2.9845e+06	2.51776e+06	2.88566e+06	2.88353e+06	3.32867e+06	3.62245e+06	3.16439e+06	7.31024e+06	3.26274e+06	3.37078e+06	3.79795e+06	2.58286e+06	2.41481e+06	3.06666e+06	2.71579e+06	1.91719e+06	3.1416e+06	2.24958e+06	2.28717e+06	5.80947e+06	2.3493e+06	2.34897e+06	2.73262e+06	2.58599e+06	0.805747	0.235598	0.824725	-0.278015	insig
MW0104776	C5H8O5	2-Hydroxyglutaric acid	Organic acid And Its derivatives	Organic acid And Its derivatives	MS2-MetDNA	0.5839	2889-31-8	9192.3	24723.2	5438.75	4889.87	19993.8	29817.8	14676.1	7673.53	6152.52	4168.42	1319.96	3006.28	1626.25	22939.1	798.214	1791.93	6526.25	12568.4	5155.43	1314.93	5754.97	4553.83	6079.94	4461.05	4688.74	1.28444	0.0456135	0.434454	-1.20272	down
MEDL00643	C13H16N2O4	Phenylacetylglutamine	Amino acid and Its metabolites	Amino acid derivatives	MS2-Search-Local	0.9253	28047-15-6	1.80138e+06	795327	1.37927e+06	663632	3.38823e+06	2.26763e+06	339832	4.65377e+06	474787	4.96244e+06	175924	1.21843e+06	1.03506e+06	6.42132e+06	1.39048e+06	73596.4	1.07064e+06	3.33783e+06	2.11535e+06	3.87215e+06	922707	1.11881e+06	1.52498e+06	8.71401e+06	742613	0.130063	0.833531	1.08506	0.117774	insig
MW0015586	C22H36O2	Adrenic acid	FA	FFA	MS2-MetDNA	0.5917	27456-22-0	205727	298943	358476	327298	255812	435633	167730	336933	315350	301409	275389	361390	230229	270820	347224	306507	333605	347794	342950	277473	275454	213624	241520	358648	315246	0.0719308	0.986397	0.998426	-0.00227303	insig
MW0012563	C18H36O2	Isostearic acid	FA	FFA	MS2-Search-DB	0.903	2724-58-5	2.4593e+07	4.43435e+07	1.95447e+07	1.3744e+07	2.6603e+07	2.99288e+07	2.7758e+07	5.24928e+07	3.86304e+07	1.87892e+07	2.36893e+07	1.61795e+07	1.48898e+07	2.38534e+07	2.5705e+07	3.18945e+07	2.90698e+07	1.59109e+07	3.06893e+07	4.56071e+07	1.79281e+07	2.30289e+07	3.08064e+07	2.20716e+07	2.02855e+07	0.612106	0.283544	0.83575	-0.258856	insig
MW0146995	C3H7CaO6P	Calcium glycerophosphate	Organic acid And Its derivatives	Organic acid And Its derivatives	MS2-Insilico	0.7201	27214-00-2	6.65139e+06	1.4698e+07	1.50843e+07	1.74696e+07	1.10464e+07	1.61381e+07	1.54208e+07	1.51006e+07	1.82846e+07	1.59887e+07	1.50053e+07	1.38886e+07	4.91304e+06	1.27075e+07	1.39233e+07	1.25394e+07	4.12434e+06	1.09142e+06	1.08796e+07	1.23248e+07	1.18228e+07	5.28078e+06	1.16791e+07	7.68283e+06	1.28967e+07	1.16489	0.00740881	0.688954	-0.537521	insig
MW0004918	C18H30O3S	4-Dodecylbenzenesulfonic Acid	Benzene and substituted derivatives	Benzene and substituted derivatives	MS2-Search-Local	0.6868	27176-87-0	1.77675e+07	1.7315e+06	1.72348e+07	3.49251e+07	392176	7.51892e+06	1.21768e+07	5.27346e+07	2.1448e+07	2.36046e+07	3.58601e+07	2.45364e+07	2.34445e+07	6.39096e+07	3.01848e+07	3.4556e+07	7.00789e+07	3.13394e+07	3.41398e+07	5.13792e+07	2.44696e+07	3.14148e+07	7.1526e+07	2.82068e+07	4.2889e+07	1.43988	0.00467362	2.10318	1.07257	up
MW0049224	C18H38NO5P	D-erythro-Sphingosine-1-phosphate	Heterocyclic compounds	Heterocyclic compounds	MS2-Search-DB	0.652	26993-30-6	40784.5	40877.6	59082.8	4323.17	5081.62	43160	7283.37	70402.3	97080.1	69062.2	52652	100151	64394.9	48581.4	76666.8	63453.8	67064.8	100373	77967.7	77666.6	85544.8	64598.1	54962.5	81262.1	61645.9	1.34222	0.0221708	1.64248	0.715876	insig
MEDP0634	C20H38O2	FFA(20:1)	FA	FFA	MS2-Search-Local	0.8721	26764-41-0	332516	1.07319e+06	338690	116309	617862	559839	553979	1.17835e+06	720838	252213	443852	358217	118789	380658	473977	432450	605054	154368	553584	970698	242709	533936	781053	623754	291513	0.490407	0.388407	0.808366	-0.30692	insig
MEDN0461	C7H15O10P	Sedoheptulose 7-phosphate	Carbohydrates and Its metabolites	Phosphate sugars	MS2-Search-DB	0.6961	2646-35-7	193879	85825.5	145354	69441.9	168424	180066	201924	154724	172527	250916	342286	262689	237085	186252	222592	429132	150499	159741	182949	160304	368978	243608	227043	362946	183496	1.29207	0.00601121	1.52779	0.611449	insig
MW0012191	C18H34O4	12,13-DiHOME	FA	Oxidized lipids	MS2-Search-Local	0.774	263399-35-5	533159	456212	412121	467204	394581	499185	309714	318965	443475	227711	157086	531341	461289	932313	898755	624365	809059	825329	870227	876233	639797	651923	648669	942404	512851	1.51082	0.000221258	1.70373	0.768694	insig
MW0147336	C32H48O9	Cerberin	Heterocyclic compounds	Heterocyclic compounds	MS2-Insilico	0.5586	25633-33-4	406604	179039	157662	151963	282265	167074	352380	136242	227097	62900.9	624785	285725	206637	187588	182333	513869	365755	303553	218495	67590	242590	340288	89682.8	74807.1	309249	0.30247	0.300301	1.26002	0.333441	insig
MEDN1079	C22H32O2	FFA(22:6)	FA	Oxidized lipids	MS2-Search-Local	0.789	25167-62-8	1.27224e+06	560534	168888	560827	811323	687023	1.48383e+06	1.24494e+06	286423	322302	1.09226e+06	208406	832238	1.3856e+06	447139	953215	282011	2.0747e+06	648838	1.21769e+06	518986	763841	1.66455e+06	789129	810109	0.567805	0.386728	1.2335	0.302752	insig
MEDL00447	C20H32O2	AA	FA	Oxidized lipids	MS2-Search-Local	0.8837	24880-40-8	1.95757e+06	636211	414982	1.1431e+06	1.20052e+06	912111	2.04804e+06	788441	728758	608605	790248	708965	1.04971e+06	1.20816e+06	1.28936e+06	981187	744766	1.98952e+06	920647	536742	1.27633e+06	1.44891e+06	1.18116e+06	859190	836707	0.338264	0.957132	1.01048	0.015042	insig
MEDTN02068	C19H30O5S	Androsterone sulfate	Hormones and hormone related compounds	Hormones and hormone related compounds	MS2-Search-Local	0.9088	2479-86-9	1.66263e+06	716798	157731	1.45321e+06	33359.2	206409	488900	338855	1.75653e+06	708720	628023	212574	428014	791428	1.20095e+06	687708	1.98293e+06	1.38767e+06	3.82868e+06	784279	933270	2.61562e+06	91913	520850	6.01121e+06	0.724657	0.133237	1.95886	0.970012	insig
MW0133689	C19H16O5	4'-Hydroxywarfarin	Heterocyclic compounds	Heterocyclic compounds	MS2-Search-DB	0.7051	24579-14-4	2.51668e+07	2.53865e+07	2.44852e+07	2.55205e+07	1.21775e+07	2.52991e+07	2.41263e+07	1.13687e+07	2.3656e+07	1.12144e+07	1.16517e+07	2.23859e+07	1.15606e+07	1.09752e+07	1.01775e+07	1.00312e+07	1.04136e+07	9.72332e+06	9.45119e+06	9.84268e+06	9.21707e+06	9.7092e+06	1.0218e+07	8.84081e+06	9.38541e+06	1.91228	0.000679998	0.523297	-0.934297	insig
MEDN1078	C18H34O3	cis-EODA	FA	FFA	MS2-Search-Local	0.8389	2443-39-2	1.18961e+06	2.29886e+06	2.88515e+06	5.1269e+06	1.1768e+06	968330	2.69963e+06	1.01486e+06	5.38767e+06	321379	796330	1.97876e+06	917286	1.30862e+06	3.04545e+06	2.89224e+06	1.12919e+06	4.28754e+06	3.35054e+06	2.54297e+06	3.49836e+06	4.11384e+06	2.44905e+06	3.2455e+06	900722	0.49766	0.848769	1.05354	0.0752423	insig
MW0108896	C18H35NO3	N-Palmitoylglycine	Amino acid and Its metabolites	Amino acid derivatives	MS2-Search-Local	0.5685	2441-41-0	544339	501098	547410	915471	609193	559841	681897	828940	427562	108753	371414	247330	319279	890948	282198	344487	317947	23664.4	210945	203370	276206	1.78087e+06	470898	415342	640182	0.824776	0.363464	0.791344	-0.337623	insig
ZINC388293	C9H12O3	Guaiacyl Ethanol	Benzene and substituted derivatives	Phenolics	MS2-Search-DB	0.7422	2380-78-1	29083.5	8380.56	28491.7	22274.3	313875	33563.4	9351.46	133001	24475.1	2137.87	5984.45	9491.05	18911.9	134369	163500	894.336	93791.1	12632.9	8479.98	13463.3	44460	3738.46	15953.2	27089	1245.98	0.45224	0.492296	0.610844	-0.711124	insig
MEDN1417	C18H32O4	(±)13-HpODE	FA	Oxidized lipids	MS2-Search-Local	0.8455	23017-93-8	230175	664500	266180	425955	534496	380053	1.0022e+06	446846	644752	335392	233632	275696	579107	1.27356e+06	524111	400528	437981	309569	456496	318251	455329	1.02827e+06	460430	399293	321884	0.0992166	0.960245	1.01059	0.0151953	insig
MW0141363	C16H28O5	13,14-dihydro-15-keto-tetranor PGF1	Hormones and hormone related compounds	Hormones and hormone related compounds	MS2-Search-DB	0.6313	23015-45-4	426243	345132	360944	192658	327626	334640	347204	196189	452256	438697	333702	463457	336654	369832	491388	418178	495374	455372	403480	429086	338666	357985	385771	456269	465412	1.14367	0.043385	1.20814	0.272785	insig
MW0063221	C24H47NO7	Psychosine	SL	SL	MS2-Search-DB	0.5292	2238-90-6	1.64905e+06	1.62546e+06	1.5908e+06	1.54248e+06	1.53221e+06	2.16764e+06	1.97135e+06	1.38126e+06	2.02743e+06	1.42142e+06	1.86902e+06	1.80941e+06	1.75614e+06	1.71084e+06	2.34624e+06	2.94438e+06	2.15379e+06	2.32625e+06	2.06495e+06	1.76604e+06	1.78087e+06	2.17991e+06	1.64089e+06	1.79092e+06	1.62628e+06	1.23195	0.0285553	1.17357	0.230899	insig
MW0053974	C25H34O8	Hydrocortisone hemisuccinate	Hormones and hormone related compounds	Hormones and hormone related compounds	MS2-Insilico	0.5897	2203-97-6	1.38971e+06	1.55376e+06	1.44056e+06	1.34285e+06	1.54598e+06	1.30268e+06	1.45054e+06	1.49088e+06	1.30484e+06	2.0574e+06	1.36923e+06	2.14687e+06	2.35672e+06	605750	2.06291e+06	2.22791e+06	1.9789e+06	2.60335e+06	736511	2.10572e+06	2.31313e+06	2.29068e+06	2.06685e+06	2.19248e+06	1.43275e+06	0.708191	0.0241344	1.27649	0.352183	insig
MEDL01837	C17H26O4	Nordihydrocapsiate	Phenolic acids	Phenolic acids	MS2-Search-Local	0.8303	220012-53-3	712404	236239	273813	651459	302581	324656	340693	846651	289715	233665	307443	239971	516852	302084	289249	299659	493411	338459	310293	295055	278229	370162	369019	253142	260803	0.556974	0.237817	0.779357	-0.359644	insig
MW0109000	C9H12NO6P	O-Phospho-L-tyrosine	Organic acid And Its derivatives	Phosphoric acids	MS2-Search-DB	0.7162	21820-51-9	757675	724385	395129	473322	998795	198136	878777	929652	1.21176e+06	660987	874728	567589	346278	480643	593536	391023	724214	785002	764418	665277	260304	718335	602125	279756	833920	0.559034	0.252314	0.819626	-0.286963	insig
MW0007182	C10H11F3N2O	Fluometuron	Benzene and substituted derivatives	Benzene and substituted derivatives	MS2-Search-DB	0.7881	2164-17-2	1.61193e+06	1.6578e+06	1.61597e+06	1.65813e+06	1.60868e+06	1.11961e+06	976051	997765	1.5934e+06	1.40969e+06	1.5641e+06	952928	1.56741e+06	1.58907e+06	1.4706e+06	1.42596e+06	1.53572e+06	914431	779473	1.46812e+06	983266	1.5295e+06	1.5469e+06	920362	1.44738e+06	0.400929	0.356265	0.921477	-0.117981	insig
MW0126137	C15H18O7	Picrotin	Heterocyclic compounds	Heterocyclic compounds	MS2-Search-DB	0.7159	21416-53-5	217622	226783	215250	225110	224837	242015	206336	211858	214886	209295	229042	181936	210834	197896	178967	179538	190594	174568	182377	196173	202457	181674	191617	161270	179359	1.8638	1.11633e-05	0.862446	-0.213493	insig
MEDP1180	C22H46NO7P	1-Myristoyl-sn-glycero-3-phosphocholine	GP	LPC	MS2-Search-DB	0.8799	20559-16-4	323149	222969	141698	442079	394588	339766	351539	377260	397154	133220	457262	608246	653830	297872	464712	667040	421416	936827	318910	455552	343634	306707	251166	340823	159796	1.07736	0.0428089	1.4266	0.512577	insig
MW0053732	C23H46NO7P	Glycerophospho-N-Oleoyl Ethanolamine	GP	LPG	MS2-Search-DB	0.7539	201738-24-1	207310	466569	346261	684741	590625	581673	620780	377920	598559	295508	592478	820290	715079	254983	895956	1.3252e+06	603954	504926	519486	258452	646589	732951	425375	532791	486208	0.746457	0.105905	1.30186	0.380576	insig
MW0107580	C8H8N2O3	Isonicotinylglycine	Amino acid and Its metabolites	Amino acid derivatives	MS2-MetDNA	0.5376	2015-20-5	1.765e+06	1.29442e+06	1.88651e+06	1.69399e+06	1.72569e+06	1.71577e+06	1.86901e+06	1.82148e+06	1.48002e+06	1.63154e+06	1.36235e+06	583979	840495	2.09856e+06	1.89938e+06	1.87924e+06	3.25198e+06	3.02197e+06	3.41533e+06	2.90948e+06	2.25185e+06	2.06807e+06	3.57428e+06	3.21718e+06	3.3724e+06	0.712457	0.0152897	1.4115	0.497233	insig
MW0063376	C21H26O7	Rosmic acid	Terpenoids	Terpene	MS2-Search-DB	0.6311	197799-63-6	712045	753725	699586	418094	288949	445917	469347	646263	361511	400186	494548	346574	392458	388996	314917	418522	365683	353044	332891	355049	360070	395306	398005	223350	343965	1.42741	0.0178865	0.703589	-0.507195	insig
MW0105037	C10H20O3	3-Hydroxycapric acid	Organic acid And Its derivatives	Organic acid And Its derivatives	MS2-MetDNA	0.8421	19526-23-9	257938	166635	454268	159997	668057	164575	258009	589946	166201	145581	548121	178776	146904	387184	152723	573819	153408	146029	167397	531044	500330	150005	159035	143566	418500	0.176222	0.871076	0.958219	-0.0615724	insig
MADN0503	C5H10O5	L-lyxose	Carbohydrates and Its metabolites	Carbohydrates and Its metabolites	MS2-Search-Local	0.5143	1949-78-6	780337	629260	202120	441119	477354	461263	681117	465391	181305	168845	416404	170315	551071	618392	400006	334805	465883	612853	476624	140966	243098	596995	705536	297852	469318	0.0278196	0.849869	0.965532	-0.0506047	insig
MW0126740	C5H8O2S	Tetrahydrothiophene-2-carboxylic acid	Organic acid And Its derivatives	Organic acid And Its derivatives	MS2-Search-DB	0.7171	19418-11-2	362035	363757	358636	328683	323039	259766	345793	336196	247875	196502	157252	251446	307518	295190	239115	230613	326252	419931	372184	255988	229076	390187	221980	258629	352938	0.479569	0.349972	0.919904	-0.120445	insig
MW0126133	C6H3Cl3N2O2	Picloram	Heterocyclic compounds	Heterocyclic compounds	MS2-Search-DB	0.6355	1918-02-1	673493	729987	730823	697741	742795	769914	760443	779975	884973	576973	767942	693349	712079	562927	780032	792740	822072	836097	800403	650864	769754	869913	567235	739474	808800	0.027282	0.770873	1.01388	0.019892	insig
MW0005032	C12H5Cl5O	4-Hydroxy-2',3,3',5',6'-pentachlorobiphenyl	Benzene and substituted derivatives	Benzene and substituted derivatives	MS2-Search-DB	0.6488	189578-02-7	1.25125e+06	1.14072e+06	1.11661e+06	1.13715e+06	1.16006e+06	1.13134e+06	1.20512e+06	1.19912e+06	1.12265e+06	1.22156e+06	1.16955e+06	1.11006e+06	1.04488e+06	981818	1.06806e+06	1.07584e+06	1.00466e+06	961983	895813	998654	1.03096e+06	868588	897696	945853	1.00761e+06	1.98807	2.26276e-06	0.859295	-0.218774	insig
MW0122903	C30H42N2O2	Arachidonoyl Serotonin	Tryptamines,Cholines,Pigments	Tryptamines	MS2-Search-DB	0.7924	187947-37-1	553374	593002	544825	498414	512376	522140	489763	516777	520479	535196	573920	496137	591285	586923	484557	501806	491763	493582	516834	456090	473905	521745	508352	501196	519629	0.482723	0.323188	0.973291	-0.0390575	insig
MW0147405	C12H6Cl3NO3	Chlornitrofen	Benzene and substituted derivatives	Benzene and substituted derivatives	MS2-Insilico	0.7943	1836-77-7	99287.3	94822.1	89522.9	91329.2	93262.5	98788.6	101937	91771	120325	67425	106816	110930	113019	87553	114833	119494	97901.4	112606	260921	85122	112486	120160	95640.9	238283	115762	1.01018	0.0386891	1.32953	0.410915	insig
MEDTN01193	C7H14O6	Methyl beta-D-galactopyranoside	Carbohydrates and Its metabolites	Sugars	MS2-Search-Local	0.5308	1824-94-8	8496.44	487.799	38927.6	4907.88	2253.81	500.47	29.4116	127.059	619.563	122.998	1241.21	5645.88	30547.5	469.886	2785.38	640.698	568.469	1001.73	199287	817.126	105.587	199.55	44990.6	835.574	146.682	0.443962	0.338571	3.415	1.77189	insig
MW0107542	C8H8Cl2IO3PS	Iodofenphos	Benzene and substituted derivatives	Benzene and substituted derivatives	MS2-Insilico	0.6028	18181-70-9	396056	374169	394556	119140	401465	334239	397950	284370	178879	222961	938638	329193	140013	259807	296903	293273	283056	251675	275000	599698	151562	95945.4	246261	267302	302381	0.348356	0.93693	1.01612	0.0230644	insig
MW0117028	C21H19ClN4O2	1H-Indole-1-carboxamide,6-chloro-2,3-dihydro-5-methyl-N-[6-[(2-methyl-3-pyridinyl)oxy]-3-pyridinyl]-	Alcohol and amines	Amines	MS2-Search-DB	0.7106	181632-25-7	432937	419743	410789	436089	420282	447711	436221	435484	421772	410082	409292	403042	441139	375925	407644	436917	453564	411204	398722	375157	429415	411820	395267	409764	396885	1.02954	0.0246554	0.960836	-0.0576377	insig
MEDL00401	C15H22O2	Confertifoline	Aldehyde,Ketones,Esters	Esters	MS2-Search-Local	0.7097	1811-23-0	282451	288454	237458	253068	257587	318965	296902	253448	282321	231693	281082	255355	274686	291166	280034	296276	252025	304119	260847	268258	266723	269471	250740	243169	281634	0.215983	0.884418	1.00544	0.00783164	insig
MW0012968	C42H80NO8P	1-Palmitoyl-2-linoleoyl-sn-glycero-3-phosphocholine	GP	PC	MS2-Search-DB	0.8699	17708-90-6	38094.2	46730.4	33907.5	53244.3	80476.5	39056.3	96631.4	21866.7	5550.77	14562.7	10322.9	8679.1	9530.86	36864.5	31174.9	33594.8	30816.6	42060.2	7733.32	6785.84	147657	110177	62646.5	59322.1	12509.5	0.299009	0.866172	0.945279	-0.0811884	insig
MW0009478	C25H27N5	Piperidine,4-(5H-dibenzo[a,d]cyclohepten-5-ylidene)-1-[4-(2H-tetrazol-5-yl)butyl]-	Benzene and substituted derivatives	Benzene and substituted derivatives	MS2-Search-DB	0.709	162640-98-4	55849.9	5783.73	82869.6	2744.22	7238.48	17324.1	9078.73	51666.1	64089.8	6224.43	112292	147059	140203	704855	253828	183736	150418	280577	295807	169027	196349	208725	301908	167186	257882	2.17817	5.40986e-05	7.85785	2.97413	up
MW0009689	C17H14Cl2F2N2O3	Roflumilast	Benzene and substituted derivatives	Benzene and substituted derivatives	MS2-Search-DB	0.5048	162401-32-3	60377.2	66697.4	71314.1	77649.6	65103.3	90470.9	85503.1	59885.7	92604.7	67607.5	1481	118013	26582.2	112690	196012	164578	207805	120573	47757	154428	214166	87149.6	61155.9	149969	95421.4	0.269799	0.0233116	1.58957	0.668639	insig
MW0005026	C12H5Cl5O	3-Chloro-4-(2,3,5,6-tetrachlorophenyl)phenol	Benzene and substituted derivatives	Benzene and substituted derivatives	MS2-Search-DB	0.6357	150304-11-3	373845	380133	403165	408064	372109	362205	365871	407022	450696	377641	417932	911744	281582	525210	235737	216806	345484	760089	207107	512903	759035	244018	901111	800816	476114	0.408281	0.105324	1.29816	0.376466	insig
MW0007847	C9H11ClN2O	Monuron	Benzene and substituted derivatives	Benzene and substituted derivatives	MS2-Search-DB	0.7015	150-68-5	9.60919e+06	1.09474e+07	1.09818e+07	1.24346e+07	1.18735e+07	1.08098e+07	5.1881e+06	1.01074e+07	4.96784e+06	5.38437e+06	6.13536e+06	9.23139e+06	5.9798e+06	1.20312e+07	9.52417e+06	4.63839e+06	1.01893e+07	4.41834e+06	4.55797e+06	9.74832e+06	5.03893e+06	1.08072e+07	6.07448e+06	3.99244e+06	4.89438e+06	0.935902	0.089916	0.774698	-0.368293	insig
MW0007231	C7H6O5	Gallic acid	Benzene and substituted derivatives	Benzene and substituted derivatives	MS2-Search-Local	0.6585	149-91-7	167053	11167.3	2472.92	227675	7.94423e+06	48116.8	6758.67	26371.9	197933	27222.3	10881.6	39652.4	99450.5	87161.5	1398.42	39532.8	61655.1	486.612	34973.2	1706.93	61108.2	229797	279600	2.19963e+06	401427	0.251817	0.450408	0.2732	-1.87197	insig
MEDL02046	C9H7NO2	Indole-2-Carboxylic Acid	Heterocyclic compounds	Indole and Its derivatives	MS2-Search-Local	0.7752	1477-50-5	3.93947e+06	4.37727e+06	3.72907e+06	4.39958e+06	4.15531e+06	4.01958e+06	4.0997e+06	6.18203e+06	3.92262e+06	5.80601e+06	4.62805e+06	3.2808e+06	4.28357e+06	3.46627e+06	5.44396e+06	3.42781e+06	3.60574e+06	3.34744e+06	5.65316e+06	5.05333e+06	3.94615e+06	3.90393e+06	3.70472e+06	4.93328e+06	3.60819e+06	0.646126	0.365724	0.930398	-0.10408	insig
MW0102909	C18H34O2	trans-Vaccenic acid	FA	FFA	MS2-MetDNA	0.8775	143-25-9	1.03555e+06	1.19353e+06	1.24528e+06	5.29971e+06	3.55869e+06	5.1703e+06	1.27889e+06	1.52921e+06	2.8743e+06	4.02282e+06	4.91215e+06	4.20934e+06	1.24742e+07	3.46744e+06	4.94379e+06	4.97657e+06	2.05294e+06	1.33399e+07	4.97882e+06	4.24127e+06	4.47392e+06	5.36544e+06	3.95623e+06	3.0048e+06	4.15047e+06	1.61088	0.0130452	1.9736	0.980827	insig
MEDL02332	C12H24O2	FFA(12:0)	FA	FFA	MS2-Search-Local	0.8011	143-07-7	682859	279822	971008	542082	436054	526478	453986	1.10603e+06	231309	921665	332593	208034	1.81333e+06	308436	312527	436700	492966	1.21538e+06	413555	1.14361e+06	404298	566912	342573	239493	403050	0.220903	0.794573	0.93568	-0.0959135	insig
MW0154179	C4H6N2Na2S4	Nabam	Organic acid And Its derivatives	Sulfonic acids	MS2-Insilico	0.7204	142-59-6	4.93762e+06	5.20197e+06	4.52912e+06	3.62516e+06	3.59705e+06	3.53105e+06	3.7365e+06	3.2753e+06	3.51558e+06	2.74237e+06	3.75915e+06	3.79407e+06	2.61046e+06	2.51491e+06	2.44698e+06	2.55129e+06	2.39113e+06	2.36676e+06	2.63357e+06	2.43147e+06	2.68809e+06	3.07196e+06	2.92039e+06	2.44884e+06	2.65152e+06	1.93903	0.00116772	0.711273	-0.491524	insig
MW0052431	C33H52O8	Disogluside	Heterocyclic compounds	Heterocyclic compounds	MS2-MetDNA	0.957	14144-06-0	235513	269687	130022	273461	143773	261570	269788	187449	328523	119586	352914	185836	268723	249718	283765	428906	176022	451650	199964	518762	154736	273789	328798	262036	180148	0.997601	0.0833263	1.29639	0.374503	insig
MW0125286	C28H38N6O2	N-(1-benzylpiperidin-4-yl)-6,7-dimethoxy-2-(4-methyl-1,4-diazepan-1-yl)quinazolin-4-amine trihydrochloride	Benzene and substituted derivatives	Benzene and substituted derivatives	MS2-Search-DB	0.7576	1392399-03-9	220000	70251.3	173313	218166	27108	2978.12	312877	176590	139484	64815.2	133431	77103	219953	194012	139647	33023.2	100523	133126	99131.9	117048	47836.3	315085	20460.9	65851.9	70998.5	0.143241	0.547337	0.838197	-0.254639	insig
MW0000818	C10H12O4	2-(4-Methoxyphenoxy)propanoic acid	Benzene and substituted derivatives	Benzene and substituted derivatives	MS2-Search-DB	0.7172	13794-15-5	330345	728749	752148	772046	807531	817666	840047	817535	798605	740955	347797	331040	367410	359372	803754	793313	769405	826664	830644	822017	358363	354406	845021	339226	790272	0.837824	0.0743221	0.804677	-0.313519	insig
MW0111943	C4H6O6	2,3-Dihydroxybutanedioic acid	Organic acid And Its derivatives	Organic acid And Its derivatives	MS2-Search-DB	0.7605	133-37-9	3.56797e+06	1.68999e+06	3.25942e+06	1.7073e+06	3.59152e+06	1.63276e+06	1.49264e+06	2.97594e+06	1.86726e+06	1.48968e+06	1.76759e+06	1.53804e+06	1.69389e+06	1.47356e+06	1.24029e+06	1.48356e+06	1.47117e+06	1.3468e+06	1.38619e+06	1.20708e+06	1.5031e+06	1.6231e+06	1.39232e+06	1.33596e+06	1.3142e+06	1.70966	0.013362	0.623769	-0.680916	insig
MW0004398	C8H8O2S	4-(Methylthio)benzoic acid	Benzene and substituted derivatives	Benzene and substituted derivatives	MS2-Search-DB	0.6269	13205-48-6	37588.8	36867.9	38431.8	34664.8	45098.1	44888.5	16305.4	33163.1	17889.8	27255.5	9043.87	37218.6	145027	93717.7	49135.9	54597.6	73495.7	111439	35604.5	43811.8	122170	60662.3	31284.3	99410.3	96323	1.37077	0.00236039	2.13343	1.09318	up
MW0142645	C12H6Cl4O2	3,3',5,5'-Tetrachloro-4,4'-biphenyldiol	Benzene and substituted derivatives	Benzene and substituted derivatives	MS2-Insilico	0.7076	13049-13-3	679187	703628	654364	711215	693551	745680	691518	700457	739662	723665	628029	673661	711257	546350	761109	782072	813442	786011	723220	603866	713282	804808	586427	643382	692978	0.194205	0.789233	0.991055	-0.0129631	insig
MEDN1329	C26H43NO5	Glycohyodeoxycholic acid	Bile acids	Bile acids	MS2-Search-Local	0.9049	13042-33-6	61599.6	326130	549406	176740	95722	161493	140540	58968.8	595640	40590.3	10361.7	468936	146281	61321.1	668268	132752	1.20079e+06	926876	30244.6	81989.3	1.03116e+06	240529	729742	92171.5	27516.4	0.316827	0.188795	1.76692	0.821238	insig
MW0168955	C9H5ClINO	Clioquinol	Heterocyclic compounds	Heterocyclic compounds	MS2-Search-DB	0.6392	130-26-7	202524	218873	194495	205380	223496	228606	194195	193435	150193	203431	279604	149333	128377	207050	200500	189122	231420	194568	158895	182574	145208	189081	142640	282665	142890	0.669308	0.359931	0.934474	-0.0977737	insig
MW0052943	C32H47F5O3S	Fulvestrant	Benzene and substituted derivatives	Benzene and substituted derivatives	MS2-Search-DB	0.6198	129453-61-8	148011	143502	111368	144446	148505	138007	138312	112388	188958	134982	158059	452590	595256	189423	215377	508735	134517	707482	159280	88078.1	224750	242326	158183	297058	181589	1.48396	0.0092386	2.04131	1.02949	up
ZINC14727570	C27H34O5	Licorisoflavan A	Heterocyclic compounds	Heterocyclic compounds	MS2-Search-DB	0.5746	129314-37-0	1.56094e+06	2.55043e+06	3.19897e+06	4.56443e+06	2.22613e+06	1.57171e+06	3.31748e+06	2.14628e+06	2.95134e+06	2.76747e+06	2.78289e+06	1.97329e+06	2.75055e+06	1.44526e+06	2.86048e+06	1.49854e+06	3.24299e+06	1.62922e+06	1.84208e+06	2.67806e+06	1.42782e+06	1.97056e+06	1.63712e+06	2.66573e+06	1.38917e+06	0.895443	0.106004	0.789265	-0.341418	insig
MW0140178	C20H32O3	(±)16-HETE [(±)16-hydroxy-5Z,8Z,11Z,14Z-eicosatetraenoic acid]	FA	Oxidized lipids	MS2-MetDNA	0.5806	128914-46-5	7648.25	12446.1	42121.2	14346.4	23541.2	453079	126505	1952.46	15123.3	14695.4	13145.6	84621.6	4715.8	41201.5	128386	42317.1	140237	19216.4	12666	1254.96	546668	36884.6	81686.2	99288.3	15772.5	0.342504	0.81416	1.18823	0.248811	insig
MW0017083	C27H46O4S	Cholesterol sulfate	Hormones and hormone related compounds	Hormones and hormone related compounds	MS2-MetDNA	0.7486	1256-86-6	56961.8	73282.8	7702.93	7496.21	4271.8	3436.4	5224.99	6345.63	5769.68	20107.3	10561	4026.13	11313.5	55905.1	68507.4	20402.9	10700.4	13548.1	14914.5	12804.6	11755.4	10681.7	8936.3	15696.7	18918.3	0.60745	0.9842	1.0097	0.0139236	insig
MW0004841	C7H6ClNO4S	4-Chloro-3-sulfamoylbenzoic acid	Benzene and substituted derivatives	Benzene and substituted derivatives	MS2-Search-DB	0.6878	1205-30-7	182590	118537	191833	158713	373936	65780.3	277684	386648	207611	242665	233909	232917	202932	284062	301595	110154	377212	348640	322526	364654	105034	194915	209945	151343	332698	0.403939	0.449711	1.14009	0.189142	insig
MW0006162	C31H35F3N8O3	Benzamide,N-[2-(dimethylamino)ethyl]-N-methyl-4-[[[[4-[4-(4-morpholinyl)-7-(2,2,2-trifluoroethyl)-7H-pyrrolo[2,3-d]pyrimidin-2-yl]phenyl]amino]carbonyl]amino]-	Benzene and substituted derivatives	Benzene and substituted derivatives	MS2-Search-DB	0.6944	1202884-94-3	745736	665785	687799	526403	535323	633439	574511	547201	650053	591510	687003	675416	668185	667703	773853	988519	691293	796144	646921	594663	623917	556997	598026	599668	660850	1.03015	0.0774034	1.10745	0.147247	insig
MEDN1854	C18H36O4	9,10-dihydroxystearic acid	FA	FFA	MS2-MetDNA	0.5844	120-87-6	138857	401078	67056.5	111577	96747.3	101957	101024	215233	100445	49522.1	72756.6	107825	157962	96833.1	94853.9	431499	76809.5	470721	98080.7	399595	289665	123857	382307	367206	360300	0.993893	0.0690039	1.70114	0.766498	insig
MW0062178	C19H38O2	Pristanic acid	Terpenoids	Ditepenoids	MS2-MetDNA	0.848	1189-37-3	80324.2	10978.9	89470.8	73903.4	193.502	4178.23	97053.1	103990	603.35	196460	158000	138088	157931	140162	145533	185559	159804	165655	161289	138690	144504	130190	109585	137110	149231	1.45109	0.00241676	2.25348	1.17216	up
MEDN1810	C10H6N2O2	(3,4-Dihydroxybenzylidene)malononitrile	Benzene and substituted derivatives	Phenolics	MS2-Search-DB	0.6606	118409-57-7	1.17202e+06	1.47117e+06	1.4604e+06	1.37169e+06	1.46722e+06	1.46043e+06	1.45628e+06	1.46475e+06	1.79701e+06	879714	512352	1.8144e+06	3.67726e+06	2.70121e+06	1.53773e+06	1.7669e+06	2.26048e+06	2.84089e+06	2.33298e+06	1.24815e+06	2.94313e+06	2.60349e+06	128475	2.47195e+06	2.41749e+06	0.465416	0.015524	1.48835	0.573714	insig
MW0115612	C2H3Cl3O	2,2,2-Trichloroethanol	Alcohol and amines	Alcohols	MS2-Insilico	0.6892	115-20-8	1.5165e+06	648218	1.67238e+06	1.5129e+06	5703.82	1.11368e+06	1.40166e+06	1.50173e+06	1.61293e+06	1.5719e+06	1.90876e+06	1.65389e+06	831497	1.45817e+06	1.29914e+06	1.55726e+06	1.48522e+06	1.22356e+06	1.50617e+06	1.45653e+06	1.68306e+06	1.83333e+06	1.63368e+06	1.70375e+06	1.72221e+06	0.740419	0.158133	1.21872	0.285362	insig
MW0055469	C18H34O2	Oleic acid	FA	FFA	MS2-MetDNA	0.9469	112-80-1	42753.8	38610.8	7631.47	138594	60578.6	91378.9	47624.7	100096	22130.6	47475.3	61602.8	18145.8	124598	38367	57035.6	63115.7	15594	104412	71066.8	20037.5	49129.5	81869.5	46143	24330.7	47688.5	0.0675965	0.750741	0.919385	-0.121259	insig
MW0012774	C28H58NO7P	1-Arachidoyl-2-hydroxy-sn-glycero-3-phosphocholine	GP	PC	MS2-Search-DB	0.5753	108341-80-6	6.04658e+06	5.45187e+06	5.96149e+06	4.58036e+06	5.01741e+06	5.0768e+06	5.27088e+06	5.73453e+06	6.80282e+06	6.86214e+06	5.11341e+06	6.90005e+06	4.95471e+06	4.8878e+06	6.57577e+06	5.95555e+06	6.90669e+06	5.95543e+06	5.81623e+06	5.61091e+06	5.02133e+06	4.97357e+06	5.20836e+06	6.75666e+06	6.47186e+06	0.11056	0.686202	1.02231	0.0318336	insig
MW0137957	C9H10O4	Dihydrocaffeic Acid	Organic acid And Its derivatives	Organic acid And Its derivatives	MS2-Search-DB	0.5859	1078-61-1	167755	174226	542621	47217.8	45380.7	144946	234005	312333	124005	469718	354645	186593	462072	885301	588399	476936	351266	534073	412751	544585	434260	518837	736453	521970	500873	1.74282	0.000691072	2.21289	1.14593	up
MW0007225	C12H11ClN2O5S	Furosemide	Benzene and substituted derivatives	Benzene and substituted derivatives	MS2-Search-DB	0.6527	106391-48-4	771434	743984	823654	710005	714091	533193	885778	846867	510547	423043	197302	432504	651298	557580	371527	370992	754030	1.11452e+06	582263	453258	399506	593404	310851	424106	941991	0.944175	0.0691238	0.780851	-0.35688	insig
MW0004907	C6H5ClO	4-Chlorophenol	Benzene and substituted derivatives	Phenolics	MS2-Search-Local	0.734	106-48-9	492859	445290	530942	429539	349106	433579	438029	428270	482348	405419	453491	522731	378196	457445	375142	369888	340288	403288	363707	361944	377026	430433	357449	327130	341008	1.22644	0.0202752	0.880671	-0.183326	insig
MW0138751	C18H14Cl2O7	Leoidin	Heterocyclic compounds	Heterocyclic compounds	MS2-Search-DB	0.6198	105350-54-7	579598	527497	377628	547319	326272	340636	578315	347990	754446	502190	565476	594879	340917	339246	438392	314733	571129	304427	330847	289164	311083	337332	497843	600747	306420	0.861791	0.161403	0.838833	-0.253545	insig
MW0110325	C6H6N2O2	Urocanic Acid	Organic acid And Its derivatives	Organic acid And Its derivatives	MS2-Search-Local	0.7878	104-98-3	88719.3	62984.4	76719	84394.6	29936.1	48467	87612.5	65060.4	88934.5	79092.9	96551.8	77669	72854.7	93807.2	132879	126318	133312	132138	130684	138710	116366	81262.1	125963	94702.8	88438.7	1.72088	0.000234872	1.5373	0.620402	insig
MW0103576	C7H15N2O8P	Glycinamide ribonucleotide	Nucleotide And Its metabolites	Nucleotide and Its metabolites	MS2-MetDNA	0.7503	10074-18-7	1460.88	443.196	121.07	29714.6	164561	152179	30082.2	7784.67	23479.2	22482.7	1086.89	22625.8	5289.26	36913.7	40808.9	43454.6	48487	37465	27838	11467.1	43667.7	25204.4	24225.2	43658.1	11406.1	0.62851	0.47051	0.653233	-0.614331	insig
MW0141973	C12H6Cl4O2	2,3,5,6-Tetrachloro-4,4'-biphenyldiol	Benzene and substituted derivatives	Benzene and substituted derivatives	MS2-Insilico	0.6725	100702-98-5	1.03118e+06	327299	308525	437417	457547	383160	460836	204423	542585	267630	933234	460758	363330	163402	138352	383516	104275	489624	270870	352648	206966	302918	295543	306875	896072	0.636913	0.513169	0.854844	-0.226267	insig
MW0114952	C8H15NO6	N-Acetyl-D-Glucosamine	Carbohydrates and Its metabolites	Sugar derivatives	MS2-MetDNA	0.9577	10036-64-3	54989.4	2467.15	42089.8	35617.2	35412.7	1987.44	48805.3	43582.3	60912.8	48700	58473.8	42255.6	42018.8	60606.6	65640.6	71690.8	65535.8	58388	65387.2	64268.7	66622	66814.4	53453.7	59034.2	54078.8	1.24472	0.00715689	1.59166	0.670533	insig
MW0125970	C28H44N2O2	Oleoyl Serotonin	Tryptamines,Cholines,Pigments	Tryptamines	MS2-Search-DB	0.7064	1002100-44-8	840366	877633	831872	862866	845206	859281	853221	874792	832121	802974	880428	757237	842667	837653	727568	724390	750055	686068	739559	767535	718120	751895	734620	687008	705037	1.84377	1.43645e-05	0.889104	-0.169577	insig
MW0149443	C8H14N2O5	gamma-L-Glutamyl-D-alanine	Amino acid and Its metabolites	Amino acids	MS2-MetDNA	0.7551	-	2.08976e+06	2.04054e+06	2.03498e+06	2.1173e+06	2.14572e+06	2.2144e+06	2.20923e+06	2.1988e+06	2.21383e+06	1.95062e+06	2.20571e+06	901772	2.21618e+06	853755	2.16543e+06	2.21213e+06	919576	2.25441e+06	933049	920134	2.26915e+06	2.20286e+06	2.2793e+06	2.17633e+06	871676	0.94698	0.0274219	0.797588	-0.326284	insig
MW0169194	C26H34O7	fumagillin	Heterocyclic compounds	Heterocyclic compounds	MS2-Search-DB	0.7017	-	536055	360200	379378	340704	321108	319430	407112	441828	1.16109e+06	458175	253448	883122	231196	444429	575599	367696	663745	361843	323925	521252	458440	321749	446510	582167	417792	0.0884766	0.865598	0.966884	-0.0485853	insig
MW0147515	C6H6O4	cis,cis-4-Hydroxymuconic semialdehyde	Organic acid And Its derivatives	Organic acid And Its derivatives	MS2-MetDNA	0.8529	-	1.77123e+06	1.72571e+06	1.92717e+06	1.51165e+06	1.84188e+06	1.73005e+06	1.86818e+06	1.76371e+06	1.79472e+06	448038	1.76622e+06	2.02915e+06	1.71268e+06	1.84048e+06	2.46363e+06	1.60604e+06	1.46097e+06	1.42933e+06	1.5932e+06	1.5207e+06	1.79245e+06	1.52383e+06	1.50304e+06	1.44335e+06	1.44416e+06	0.283651	0.814263	1.02261	0.032262	insig
MW0146628	C6H8Cl4O2	beta-2,3,5,6-Tetrachloro-1,4-cyclohexanediol	Alcohol and amines	Alcohols	MS2-Insilico	0.5624	-	466402	337731	345132	316834	310464	298696	282932	317424	355003	329263	384676	283933	220569	344664	304536	236459	272919	255744	250887	249456	239541	298089	257353	280181	316601	1.55649	0.0105558	0.832491	-0.264493	insig
MW0159124	C24H37N5O7	Val-Phe-Lys-Asp	Amino acid and Its metabolites	Small Peptide	MS2-Search-DB	0.7552	-	131866	90122.4	134571	42622.9	98869.1	112860	34022.3	46074.9	121507	20228.4	16053.8	71833.1	523289	49823.2	464127	59427.4	332618	44358.8	33224.6	122386	502330	27232.3	121110	30235.9	25269.1	0.35883	0.144447	1.94003	0.956075	insig
MW0159036	C21H39N5O7	Val-Ile-Asp-Lys	Amino acid and Its metabolites	Small Peptide	MS2-Search-DB	0.5305	-	532493	618562	605176	507533	504961	610791	543139	561502	580052	555316	639359	592908	642741	656112	762343	910266	848391	854770	813809	802094	764048	715445	623672	722954	726833	2.0597	3.13385e-06	1.31396	0.393921	insig
MW0158467	C25H39N5O8	Tyr-Glu-Val-Lys	Amino acid and Its metabolites	Small Peptide	MS2-Search-DB	0.7565	-	601401	611516	603504	647643	749808	634441	554348	727637	677003	562688	652163	529064	622878	697054	552138	599174	621554	594144	574894	593002	648081	577929	613717	565250	573859	0.735021	0.145491	0.943476	-0.0839419	insig
MW0158444	C24H38N6O8	Tyr-Gln-Thr-Lys	Amino acid and Its metabolites	Small Peptide	MS2-Search-DB	0.865	-	2.53224e+06	2.55866e+06	2.54508e+06	2.56082e+06	2.8989e+06	2.55826e+06	2.42797e+06	2.8214e+06	2.38244e+06	2.98897e+06	2.38163e+06	2.15097e+06	2.96153e+06	2.90594e+06	2.74645e+06	2.29345e+06	3.08173e+06	2.6361e+06	2.42154e+06	2.84331e+06	2.94991e+06	2.49083e+06	2.95187e+06	2.40094e+06	2.65488e+06	0.232536	0.758495	1.01165	0.0167044	insig
MW0010208	H5P3O10	Triphosphate	Others	Metal, Non-metal and related compounds	MS2-Insilico	0.7148	-	986615	3.96128e+06	1.96365e+06	2.93709e+06	3.68397e+06	2.98969e+06	4.10129e+06	2.8395e+06	1.40853e+06	1.08187e+06	2.06975e+06	2.89845e+06	4.51181e+06	4.41608e+06	2.031e+06	727938	1.98794e+06	2.62878e+06	1.55452e+06	721164	2.08749e+06	2.96957e+06	3.00137e+06	898230	1.99704e+06	0.302617	0.541593	0.88623	-0.174247	insig
MW0010214	H3O9P3	Trimetaphosphoric acid	Others	Metal, Non-metal and related compounds	MS2-Insilico	0.6197	-	2.49291e+06	2.65699e+06	2.38761e+06	3.45366e+06	3.2874e+06	3.48622e+06	2.49607e+06	3.54165e+06	3.9846e+06	3.20674e+06	3.68149e+06	2.75172e+06	3.18437e+06	3.54611e+06	2.61105e+06	3.48712e+06	3.55046e+06	2.81511e+06	2.98605e+06	3.39986e+06	3.68906e+06	3.62903e+06	2.58851e+06	2.88322e+06	3.07781e+06	0.35277	0.654042	1.0299	0.0425077	insig
MW0156712	C20H38N6O7	Ser-Gln-Leu-Lys	Amino acid and Its metabolites	Small Peptide	MS2-Search-DB	0.7612	-	634756	552076	366369	344781	587443	612972	555680	501363	424482	662339	358436	564080	236920	434932	281068	335767	347524	290116	267773	685783	498315	606662	464343	385227	520454	1.21035	0.0447106	0.798307	-0.324985	insig
MW0156461	C9H7BrO3S	S-(4-Bromophenyl)-mercaptopyruvate	Aldehyde,Ketones,Esters	Esters	MS2-Insilico	0.6863	-	4.09522e+06	2.37208e+06	2.08279e+06	4.12527e+06	2.37446e+06	3.82291e+06	3.58293e+06	3.51756e+06	4.38937e+06	3.05359e+06	2.17527e+06	4.08906e+06	2.19639e+06	2.12255e+06	2.09201e+06	2.3215e+06	2.31965e+06	2.23606e+06	3.50797e+06	1.47431e+06	2.26383e+06	2.37144e+06	1.61543e+06	1.86723e+06	1.84694e+06	1.5729	0.00414201	0.688282	-0.538929	insig
MW0109459	C6H6O6S	Pyrogallol-1-O-sulphate	Organic acid And Its derivatives	Sulfonic acids	MS2-Insilico	0.5231	-	107852	109794	133003	260775	144227	148837	123525	140272	56576	80073	50958.8	111949	299396	195760	126566	149882	188460	242920	212946	106192	248940	231145	157907	224188	212610	1.08227	0.037741	1.40994	0.495636	insig
MW0155706	C21H34O5S	Pregnanolone?Sulphate	Hormones and hormone related compounds	Hormones and hormone related compounds	MS2-Search-DB	0.8908	-	566730	1.10473e+06	198291	1.23683e+06	162344	59096.3	979793	1.17474e+06	870598	295379	778302	104535	1.05366e+06	2.08781e+06	270973	382931	1.72326e+06	1.74379e+06	1.0814e+06	491277	485521	671278	630320	537018	1.17956e+06	0.699495	0.313976	1.32577	0.406831	insig
MW0139396	C22H26O6	Porson	Benzene and substituted derivatives	Benzene and substituted derivatives	MS2-Insilico	0.8544	-	292822	516720	270144	605946	231821	17675.8	376313	1.33487e+06	213108	400275	493211	123649	2.44869e+06	628299	201390	417725	575627	622590	1.00606e+06	731493	413247	130373	354052	388004	696901	0.775756	0.313879	1.44475	0.530821	insig
MW0103296	H3O3PSe	Phosphoroselenoic acid	Others	Metal, Non-metal and related compounds	MS2-Insilico	0.6942	-	2.81413e+06	2.76886e+06	2.65212e+06	2.69387e+06	2.7502e+06	2.79102e+06	2.81679e+06	2.8375e+06	2.65465e+06	2.66776e+06	2.66712e+06	2.78423e+06	2.81424e+06	2.78871e+06	2.87829e+06	2.83161e+06	2.97299e+06	2.36927e+06	2.91469e+06	2.91461e+06	2.98363e+06	2.38926e+06	2.7826e+06	2.88089e+06	2.82056e+06	0.234446	0.440292	1.01512	0.0216462	insig
MW0060422	C43H80NO8P	PE-NMe2(18:3(6Z,9Z,12Z)/18:0)	GP	PE	MS2-MetDNA	0.6267	-	45474.4	28494	75336.1	51173.3	172094	99261.5	104708	98259.2	157757	127665	66676.8	91381.2	123774	195242	178934	78719.5	87727.2	149223	393282	112207	289041	70470	78766.1	344972	168878	1.02405	0.0435033	1.68662	0.754133	insig
MW0060376	C45H80NO8P	PE-NMe2(18:1(9Z)/20:4(5Z,8Z,11Z,14Z))	GP	PE	MS2-MetDNA	0.67	-	1678.43	7311.24	69057.7	68937.2	186569	171556	241394	258005	165506	99995.3	21290	7242.32	13843.6	141344	99560.3	65843.3	81296.8	99065.5	72700.2	128889	202661	457078	269119	119488	154308	0.22335	0.963479	1.01507	0.0215844	insig
MW0060277	C41H80NO8P	PE-NMe2(16:1(9Z)/18:0)	GP	PE	MS2-Insilico	0.5969	-	16618.9	15533.1	2171.33	33094.6	3945.47	3042.31	2935.73	1897.46	1993.4	4107.96	5615.05	8024.54	12242.3	15262.2	2312.17	278.604	31476.1	11941.9	5925.02	6802.17	5041.76	3928.25	5984.37	8541.21	3027.95	0.207404	0.977763	0.987447	-0.0182241	insig
MW0060227	C42H82NO8P	PE-NMe2(15:0/20:1(11Z))	GP	PE	MS2-MetDNA	0.6619	-	15.3241	1232.23	34.4286	37.4652	26.5164	11.4525	43.3308	18.8936	123.688	76.8522	126.271	40.7951	132.432	155.044	1188.82	62.5034	24.4384	71.8737	70.1086	96.7635	89.0346	26.9829	106.852	164.146	124.078	0.863813	0.981411	1.02052	0.029306	insig
MW0059613	C41H80NO8P	PE-NMe(20:1(11Z)/15:0)	GP	PE	MS2-MetDNA	0.9499	-	59445	66742.7	10093.5	170849	27244.7	14354.1	16395	13529.3	8601.19	15759.9	27061.4	18405.6	44520.8	45719.5	14663	257.607	884046	182505	25799.5	52819.7	36016.1	24861.6	23215	26180.2	13104.7	0.133812	0.375577	2.3476	1.23119	insig
MW0059305	C41H80NO8P	PE-NMe(15:0/20:1(11Z))	GP	PE	MS2-MetDNA	0.5062	-	59347.8	22467	222145	59576.8	20809.6	30165	17933	15093.9	28634.3	16672.5	43787.3	31679	27962.6	24081.2	3173.98	173433	57720.1	38170.2	18371.3	34866.5	29236.1	25020.5	32928.6	10649.4	17844.7	0.164142	0.619994	0.769579	-0.377859	insig
MW0058268	C45H88NO8P	PE(18:1(9Z)/22:0)	GP	PE	MS2-MetDNA	0.66	-	449761	693919	439408	214599	494656	505128	473359	923987	823118	507530	356884	424879	244453	327621	454075	548257	504491	250310	419857	575859	277729	328749	447658	381657	278883	1.21844	0.0380092	0.702368	-0.509702	insig
MW0057445	C45H90NO8P	PC(22:0/15:0)	GP	PC	MS2-MetDNA	0.6973	-	495.474	3171.08	65901	98086.1	78729.4	105572	62906.2	19648	10022.4	9469.52	6470.2	7702.29	10232.1	21677.8	18933.3	14154.7	16224.5	18676.6	8307.12	89184.1	75728	32072.1	25019.5	9961.83	11593.6	0.0734552	0.170391	0.537351	-0.896062	insig
MW0057444	C44H86NO8P	PC(22:0/14:1(9Z))	GP	PC	MS2-MetDNA	0.5969	-	254878	389109	177418	107970	198526	299106	247727	418747	503236	264349	224014	217490	255609	341705	487087	746889	291572	191710	243197	325329	171677	197640	228861	201943	176321	0.080377	0.990884	1.0022	0.00317126	insig
MW0057432	C50H86NO8P	PC(20:5(5Z,8Z,11Z,14Z,17Z)/22:2(13Z,16Z))	GP	PC	MS2-MetDNA	0.608	-	1218.63	1156.11	271694	262783	174175	246967	127048	54071.7	45703.6	37560.2	30052.9	40627.6	47825.1	112435	121973	93352	53488.3	71421.8	44337.9	579256	113260	66925.3	72541.1	48538.9	69798.2	0.489243	0.718921	0.853982	-0.227722	insig
MW0057346	C43H78NO8P	PC(20:4(5Z,8Z,11Z,14Z)/15:0)	GP	PC	MS2-MetDNA	0.6151	-	826.31	400268	217058	550503	617554	407220	762583	358968	224562	126561	245224	88132.6	264564	445107	525862	417012	305975	317009	115749	527562	1.28084e+06	582637	451594	283777	100093	0.556497	0.777493	1.08219	0.113957	insig
MW0057085	C44H82NO8P	PC(18:3(6Z,9Z,12Z)/18:0)	GP	PC	MS2-MetDNA	0.6108	-	73869.6	26896	281310	72645.5	25084.1	31936.5	14554.2	13279.5	21799.9	28741.6	17679.4	41885.5	25032.6	36109.7	65399.7	224629	316823	135249	70836.1	122435	44421.1	49206.6	46950.4	28869.5	17094.8	0.76509	0.489041	1.40381	0.489351	insig
MW0057050	C42H80NO8P	PC(18:2(9Z,12Z)/16:0)	GP	PC	MS2-Insilico	0.5413	-	674.232	250.844	54.3275	9924.04	45380.3	42966.8	64574	55479.1	20974.3	11903.4	11342.1	9238.38	7418.31	10725.1	18174.5	17733.9	12377.9	12890.4	12849.2	1027.56	31184.4	32590.1	24367.4	12579.5	15459.1	0.442518	0.249205	0.607917	-0.718054	insig
MW0057049	C41H78NO8P	PC(18:2(9Z,12Z)/15:0)	GP	PC	MS2-MetDNA	0.9601	-	557.772	84.2166	4306.23	1364.7	458.16	479.272	528.099	475.548	1168.18	1166.35	1958.26	1689.24	1998.69	1352.65	60.0792	5688.04	1132.23	1434.32	1266.16	1061.08	518.538	678.529	1210.6	702.778	1331.02	0.691252	0.423079	1.39032	0.47542	insig
MW0057017	C42H80NO8P	PC(18:1(9Z)/16:1(9Z))	GP	PC	MS2-Insilico	0.5534	-	676.648	241.163	27233.5	80280.4	86381.6	148739	98960.5	39886.1	26345.5	13946.8	25381.2	24393.6	16172.8	39817.6	21682.7	38151.3	37069.8	13401.2	16521.8	215153	54545	96720.8	44844.3	72519.4	18079.2	0.52184	0.873176	0.936759	-0.0942509	insig
MW0056984	C42H80NO8P	PC(18:1(11Z)/16:1(9Z))	GP	PC	MS2-Insilico	0.5455	-	1202.58	187.603	186.224	41130.9	56335.6	45545.7	55659.4	68986.2	23036.9	14676.5	12090.9	14321.7	10489.7	23720.7	25978.2	16204.6	12578.2	15480.4	15526.4	24190.1	68117.9	59722.3	36414.9	30960.4	26982.6	0.667333	0.637389	0.853086	-0.229237	insig
MW0056854	C41H80NO8P	PC(15:0/18:1(9Z))	GP	PC	MS2-MetDNA	0.8904	-	51098.9	30774.7	11969.9	50072.6	7400.55	4404.2	5799.72	3245.25	3111.91	3893.57	10421.3	8006.79	17525.9	40466	5883.56	19645.5	64985	11725.8	7391.64	15724	11212.8	3955.49	8488.6	29982.8	3681.28	0.500049	0.989926	1.00559	0.00803848	insig
MW0056853	C41H80NO8P	PC(15:0/18:1(11Z))	GP	PC	MS2-MetDNA	0.8348	-	49623.5	58942	12609.1	246938	47682.9	17552.7	16855.8	13258.3	8723.04	12305.7	17000.2	16589.8	28590.5	22246.1	14855.5	2231.55	193717	52328.6	14440.2	10696.2	36840.4	23873.9	22288.9	31221.2	14631.5	0.280858	0.568775	0.690143	-0.535034	insig
MW0154804	C10H6N2O2S2	Oxidized Photinus luciferin	Benzene and substituted derivatives	Benzene and substituted derivatives	MS2-Insilico	0.5692	-	1.58926e+06	2.75792e+06	2.35197e+06	2.40797e+06	2.4932e+06	1.63552e+06	1.98711e+06	2.20227e+06	2.38492e+06	2.41265e+06	2.71509e+06	4.12202e+06	2.10325e+06	3.004e+06	3.6144e+06	1.90029e+06	1.65451e+06	3.27398e+06	2.82022e+06	1.58826e+06	2.81138e+06	2.34271e+06	3.15035e+06	3.3855e+06	2.37707e+06	0.881697	0.0352329	1.22586	0.293794	insig
MW0154249	C24H31N7O6	N-Acetylpuromycin	Nucleotide And Its metabolites	Nucleotide and Its metabolites	MS2-MetDNA	0.7519	-	227685	218615	254833	308187	279685	239431	309215	332833	338603	346821	249444	523105	286189	377167	314694	292869	309169	447232	346698	591537	358516	399779	435461	348471	363351	1.40203	0.0039936	1.31743	0.397724	insig
MW0114958	C8H15NO9S	N-Acetylgalactosamine 4-sulphate	Organic acid And Its derivatives	Sulfonic acids	MS2-Insilico	0.5124	-	1.31779e+06	2.37184e+06	1.10477e+06	2.47994e+06	1.41498e+06	1.2821e+06	1.40858e+06	1.20794e+06	1.71116e+06	1.35246e+06	1.59156e+06	1.23265e+06	1.39319e+06	1.06176e+06	888974	1.12123e+06	1.07484e+06	1.0578e+06	881292	1.25072e+06	1.91625e+06	1.2716e+06	902295	1.82706e+06	998466	1.03449	0.0745832	0.786702	-0.346111	insig
MW0055207	C30H60NO6P	N-(Dodecanoyl)sphing-4-enine-1-phosphate	SL	SM	MS2-Search-DB	0.6509	-	1.50773e+06	1.31861e+06	1.40506e+06	1.11654e+06	1.22347e+06	1.2545e+06	1.31386e+06	1.38014e+06	1.60437e+06	1.61305e+06	1.1172e+06	1.62131e+06	1.13628e+06	1.16324e+06	1.56753e+06	1.46781e+06	1.67711e+06	1.43211e+06	1.3988e+06	1.41772e+06	1.158e+06	1.15747e+06	1.29277e+06	1.6029e+06	1.57333e+06	0.0439886	0.872696	1.00862	0.0123806	insig
MW0055157	C24H40O4	Murideoxycholic acid	Bile acids	Bile acids	MS2-MetDNA	0.54	-	557685	336732	358454	384216	1.26036e+06	222079	577851	385584	668056	120367	189859	290492	515885	475945	224907	256259	626429	417694	928729	501604	321224	588869	190970	338661	1.11612e+06	0.0565015	0.861797	0.955736	-0.0653155	insig
MW0153224	C12H21N5O3	Lys-His-OH	Amino acid and Its metabolites	Small Peptide	MS2-Search-DB	0.8004	-	7.24352	1.29729	5.49884	1.13848	6.27324	5.36472	4.78402	5.30413	7.44544	6.39858	5065.6	18350.9	4.57441	4.96939	12596.9	2067.71	7.52679	2703.08	5.21628	5.13569	4.78714	1.15555	13.7816	1.74786	6.73666	1.0012	0.0757094	536.503	9.06744	insig
MEDN1266	C27H46NO7P	LPE(22:5/0:0)	GP	LPE	MS2-Search-Local	0.5119	-	38747.1	57064	17836.9	29483	36666.1	66955.8	123358	41989.4	50384.1	6688.92	181296	18282.2	75194.6	172260	29982.4	252764	31042.2	137340	24944.6	533509	75503.9	71011.3	261789	282853	112309	1.30295	0.0131451	3.21144	1.68322	up
MEDN0364	C23H48NO7P	LPE(18:0/0:0)	GP	LPE	MS2-Search-Local	0.8965	-	50543.8	46012.3	90935.9	64987.9	63464.3	71887.7	89322.5	73919.2	85065.3	62825.1	79343.9	97109.9	124337	71739.1	159769	167745	154719	123170	91057.5	121342	46951.7	79086.7	55413.3	72609.3	98016.5	1.26369	0.00671861	1.47114	0.556935	insig
MEDL00391	C21H44NO7P	LPE(16:0/0:0)	GP	LPE	MS2-Search-Local	0.9362	-	465002	543520	805356	593484	589165	536170	833778	650505	554174	793209	1.15283e+06	989728	1.37902e+06	543868	1.07801e+06	1.28926e+06	1.31983e+06	1.08817e+06	961924	1.04543e+06	532049	621112	645300	615720	663145	1.36114	0.00318175	1.45869	0.544669	insig
MEDN1269	C27H44NO7P	LPE(0:0/22:6)	GP	LPE	MS2-Search-Local	0.888	-	355925	323010	419231	337952	418993	273257	660831	516550	272111	391922	806266	267808	790062	517647	433232	626171	557465	733001	707744	761310	366063	446566	639225	562245	616699	1.47258	0.00231311	1.48312	0.568637	insig
MEDN1264	C27H48NO7P	LPE(0:0/22:4)	GP	LPE	MS2-Search-Local	0.5714	-	312804	155050	102045	377599	177194	347933	343490	109843	313778	173270	178687	235652	259613	198322	555695	829658	206101	358711	326100	388918	396408	489065	287524	181644	313369	1.06811	0.0731456	1.43817	0.524234	insig
MW0127502	C7H8OS	Kahweofuran	Heterocyclic compounds	Heterocyclic compounds	MS2-Insilico	0.6253	-	5.28671e+06	5.76701e+06	5.69082e+06	2.82044e+06	5.93055e+06	5.5199e+06	2.52011e+06	5.50895e+06	5.20282e+06	5.19691e+06	2.96741e+06	5.01329e+06	2.80114e+06	6.72365e+06	5.31704e+06	2.30723e+06	5.21265e+06	5.05349e+06	2.24119e+06	5.38799e+06	5.88897e+06	2.57436e+06	2.89981e+06	4.68706e+06	2.52789e+06	0.726408	0.143169	0.830609	-0.267759	insig
MW0151553	C26H43N5O5	Ile-Phe-Val-Lys	Amino acid and Its metabolites	Small Peptide	MS2-Search-DB	0.6957	-	1.02855e+06	1.20129e+06	1.09721e+06	1.14026e+06	1.16739e+06	1.11501e+06	1.09161e+06	1.32941e+06	1.78403e+06	1.57801e+06	1.59916e+06	1.22954e+06	1.4301e+06	1.88562e+06	1.67192e+06	1.77718e+06	1.42476e+06	1.66881e+06	1.66833e+06	1.45648e+06	1.40647e+06	1.90806e+06	1.52558e+06	1.48414e+06	1.4728e+06	1.74176	0.00289781	1.25585	0.328665	insig
MW0151470	C27H47N5O10	Ile-Ile-Glu-Glu-Val	Amino acid and Its metabolites	Small Peptide	MS2-Search-DB	0.6535	-	143419	475161	90972.4	153489	139753	160493	272900	166944	194033	142732	723258	154316	274193	550635	152634	898121	124062	489744	122182	1.85137e+06	262853	274603	841690	1.02693e+06	187539	1.31759	0.0187357	2.72665	1.44713	up
MW0007271	C16H15ClO6	Griseophenone B	Benzene and substituted derivatives	Benzene and substituted derivatives	MS2-Search-DB	0.6576	-	533209	536705	516552	509944	478778	513084	530095	227717	527398	228158	244095	208901	456797	375460	173292	165590	348779	171102	149535	174926	132135	327261	196866	150735	155917	1.74614	0.000133095	0.497126	-1.00832	down
MW0053447	C32H54O5	Ganoderiol C	Aldehyde,Ketones,Esters	Ketones	MS2-Insilico	0.7796	-	206867	468278	159883	233351	155874	109618	261888	151241	131440	90270.9	90901.4	127106	95530	193853	200011	125454	87596.1	59312.5	217998	75728.2	112681	253998	318486	148428	278324	0.663136	0.362506	0.807773	-0.307979	insig
MW0124154	C9H4Cl3NO2S	Folpet	Heterocyclic compounds	Heterocyclic compounds	MS2-Insilico	0.7756	-	768210	759165	720458	737215	763117	740828	669860	701797	795045	646703	721087	766879	1.17909e+06	727004	683408	753678	761436	675871	726320	668214	738026	722418	574893	724938	648510	0.149919	0.833946	1.01079	0.0154814	insig
MW0052578	C24H30O6	Eplerenone	Aldehyde,Ketones,Esters	Ketones	MS2-Search-Local	0.6452	-	418065	1.62438e+06	128708	877526	157558	3771.24	477840	671675	842338	403445	601054	80135.5	842681	1.05409e+06	185843	216467	961908	1.45509e+06	535603	203581	385744	325651	488934	349310	772484	0.540424	0.985295	1.00602	0.00866007	insig
MW0052475	C14H28O2	Dodecyl acetate	FA	Others	MS2-Insilico	0.5839	-	342662	64159.1	67880.7	240798	249278	171036	391505	263659	81579.7	72470.9	126808	109097	319207	178405	229247	703318	58835.7	513258	226904	226180	339925	430472	165365	113041	225094	0.715453	0.248242	1.35907	0.442624	insig
MW0006719	C10H8O6	Dehydrochorismic acid	Benzene and substituted derivatives	Benzene and substituted derivatives	MS2-Insilico	0.6797	-	3.49702e+07	3.18317e+07	3.29136e+07	2.91871e+07	2.93599e+07	3.29616e+07	3.25164e+07	3.11119e+07	4.82678e+07	2.92498e+07	3.38694e+07	3.95056e+07	3.21154e+07	3.12232e+07	2.82898e+07	3.48169e+07	4.0734e+07	3.25376e+07	3.51151e+07	2.85207e+07	3.15413e+07	3.58957e+07	3.05428e+07	4.1715e+07	3.15308e+07	0.185399	0.766439	1.01885	0.0269432	insig
MW0050544	C45H72O5	DG(20:2(11Z,14Z)/22:6(4Z,7Z,10Z,13Z,16Z,19Z)/0:0)	GL	DG	MS2-Insilico	0.5439	-	6696.9	921.186	259.435	8491.77	262.244	56.9562	372.905	66.9927	88.7164	251.014	484.38	941.828	4069.08	5128.38	3136.25	4434.63	13928	3937.52	144.859	973.33	666.813	3877.27	1337.71	1411.04	166.975	1.25763	0.368134	1.7036	0.768588	insig
MW0050121	C43H72O5	DG(18:1(9Z)/22:5(7Z,10Z,13Z,16Z,19Z)/0:0)	GL	DG	MS2-MetDNA	0.7092	-	14864.5	15815.2	673.83	34228.4	5034.59	1586.93	1641.5	1922	1351.03	2614.12	4906.79	3284.3	13307.5	11045.6	3646.27	194.069	29691.5	5346.07	4895.56	7355.28	5852.46	2939.76	3561.9	8646.84	2116.84	0.283674	0.82894	0.892913	-0.163408	insig
MW0148806	C5H8O5	D-Xylono-1,4-lactone	Aldehyde,Ketones,Esters	Esters	MS2-Search-Local	0.6043	-	280702	196866	158385	154793	311472	319493	537878	507595	41257.1	25787.2	661948	4838.21	158937	1.45246e+06	110795	296878	503349	1.20229e+06	413239	1.58576e+06	438847	35927.4	769071	601935	315392	0.598015	0.0348295	2.24964	1.1697	insig
MW0106303	C8H14N2O3S	Cys-Pro	Amino acid and Its metabolites	Small Peptide	MS2-Search-Local	0.6591	-	477505	629469	851274	528929	651579	779710	683845	789627	715979	627875	692330	580782	763032	672386	783463	497275	633315	804893	520672	444859	732092	902353	620829	698971	726060	0.0676605	0.96735	0.996994	-0.00434372	insig
MW0114061	C15H26N2O12	Chitobiose	Carbohydrates and Its metabolites	Sugars	MS2-Search-DB	0.5146	-	349770	530694	339119	498671	457572	399183	373945	368809	550307	245274	388607	436072	641301	636107	364266	579676	408419	431134	364566	552881	369122	431020	523247	249725	388177	0.693813	0.355631	1.09632	0.13267	insig
MW0000177	C33H38N2O5	Chaetoglobosin N	Benzene and substituted derivatives	Benzene and substituted derivatives	MS2-Insilico	0.8146	-	953460	304093	655869	1.24313e+06	136867	63791.8	776656	904155	409738	451707	758104	451163	641266	635706	401023	142313	400541	971854	290531	396075	636273	375708	142611	366537	322052	0.0955969	0.357957	0.783319	-0.352328	insig
MW0010557	C40H46O8	Argenteane	Heterocyclic compounds	Heterocyclic compounds	MS2-Insilico	0.7758	-	37537.9	128212	89788.5	60102.8	70296.5	230522	185171	316388	395661	113943	418689	363923	269982	471819	401949	307732	759285	313739	206463	553494	109916	169763	133882	118227	116056	1.28005	0.0208092	1.93121	0.949504	insig
MW0144506	C16H27N5O8	Ala-Asn-Val-Asp	Amino acid and Its metabolites	Small Peptide	MS2-Search-DB	0.7007	-	131413	39486.1	11222.6	110707	249129	391678	50304.9	129348	74523	175592	204629	365946	631585	295182	649449	454046	190114	335355	159927	290774	874195	302119	68072.7	14199	106595	1.12688	0.0128847	2.41659	1.27298	up
MW0144288	C36H45NO13	Aclacinomycin S	Aldehyde,Ketones,Esters	Ketones	MS2-Insilico	0.5244	-	98444.5	176278	150285	153580	179466	144142	61805	183231	141709	177853	244832	155046	238530	143621	176309	169939	144953	294444	171074	208984	204686	180336	168352	130653	116170	1.10878	0.0489829	1.24895	0.320717	insig
MEDN0783	C18H32O3	9,10-EpOME	FA	Oxidized lipids	MS2-Search-Local	0.827	-	781584	562692	256656	980044	268693	879372	256543	815002	422473	424373	290505	375234	727518	933377	405551	799929	319689	818845	831372	778228	784567	585245	737336	544688	878862	0.726999	0.404327	1.15816	0.211835	insig
MW0122488	C18H24N4O2	7-hydroxygranisetron	Benzene and substituted derivatives	Benzene and substituted derivatives	MS2-Insilico	0.8264	-	519363	67406.3	542043	62806.5	17179.2	225367	673129	1.74337e+06	799283	779605	1.15448e+06	884667	945474	2.57475e+06	1.1425e+06	1.39926e+06	3.4679e+06	1.27964e+06	1.77669e+06	2.37078e+06	1.30964e+06	1.23645e+06	2.76549e+06	927804	1.97945e+06	1.6978	0.000225495	3.09602	1.63041	up
MW0143804	C28H50O4	6-Deoxocastasterone	Aldehyde,Ketones,Esters	Ketones	MS2-Insilico	0.8036	-	141447	221144	136386	159437	306048	259226	435287	285655	348044	105281	268896	315467	187057	405704	92739.6	233950	209007	94528.9	268982	93947	383688	412433	261172	474067	265283	0.0863864	0.594927	1.10286	0.141253	insig
MW0143799	C23H43N5O14	6'''-Deamino-6'''-oxoneomycin C	Heterocyclic compounds	Heterocyclic compounds	MS2-MetDNA	0.7401	-	815235	822878	1.59699e+06	711532	720975	738830	832586	795457	740595	687463	810886	689038	708440	695906	1.53048e+06	870731	787156	704272	728910	832458	1.50474e+06	674208	604880	709852	727220	0.101862	0.946361	0.990969	-0.0130875	insig
MW0143797	C23H45N5O14	6'''-Deamino-6'''-hydroxyneomycin C	Heterocyclic compounds	Heterocyclic compounds	MS2-MetDNA	0.5235	-	1.38501e+06	1.34444e+06	1.44705e+06	1.24273e+06	1.11417e+06	1.29076e+06	1.26501e+06	1.15949e+06	1.24998e+06	1.10396e+06	548523	1.09875e+06	987301	1.18304e+06	1.149e+06	352417	1.22762e+06	319735	1.23041e+06	1.01747e+06	1.04826e+06	1.12687e+06	1.04264e+06	1.35173e+06	1.1148e+06	1.20392	0.0064996	0.78283	-0.353229	insig
MW0143565	C19H30O5S	5Androstan-3ol-17-one sulfate	Others	Others	MS2-Search-DB	0.8899	-	707434	216023	94363.5	474828	13674.2	30082.6	149054	130713	777396	179927	214193	86333.6	475292	298103	648406	364762	990553	504097	1.34125e+06	418027	403619	754544	67394.4	250161	2.88548e+06	1.10451	0.0830029	2.33213	1.22165	insig
MW0143474	C9H9NO6	5-(2'-Carboxyethyl)-4,6-dihydroxypicolinate	Heterocyclic compounds	Heterocyclic compounds	MS2-Insilico	0.5161	-	1.44735e+06	1.31767e+06	1.64191e+06	1.86034e+06	573085	1.20242e+06	832444	1.47043e+06	693594	1.95294e+06	1.02625e+06	1.25453e+06	1.08102e+06	2.54438e+06	1.04875e+06	1.15764e+06	1.11832e+06	959062	3.10463e+06	2.4109e+06	1.36152e+06	995494	1.00228e+06	727448	2.31714e+06	0.287283	0.476374	1.1345	0.182051	insig
MW0143463	C6H6O7S	4-Sulfolactone	Aldehyde,Ketones,Esters	Esters	MS2-Insilico	0.6064	-	53796.4	2051.64	50918.3	38259.8	32117.4	1109.35	62425.1	40983.2	51082.7	60676.9	56269.6	30638.7	42520.1	68983.2	58674.1	72638.3	66816.3	63738.2	62173.8	52774.8	65450.6	61046.9	62962.4	67940.1	57079.3	1.15714	0.0209638	1.50764	0.592293	insig
MW0143226	C7H6Cl2O2	4,6-Dichloro-3-methylcatechol	Benzene and substituted derivatives	Phenolics	MS2-Insilico	0.6536	-	852237	824553	826961	789812	739949	767708	873647	854723	1.09274e+06	835665	798231	744247	795844	731215	533887	741188	797941	522720	751145	706503	728693	816450	809476	882136	761239	1.26104	0.0156115	0.87656	-0.190075	insig
MW0119764	C12H12N4O2	3-Pyrimidin-2-yl-2-pyrimidin-2-ylmethyl-Propionic Acid	Organic acid And Its derivatives	Organic acid And Its derivatives	MS2-Search-DB	0.5497	-	977702	126127	353580	445785	1.1152e+06	201577	417459	500847	790421	1.14411e+06	1.53368e+06	1.05649e+06	883031	829745	1.02951e+06	1.37071e+06	854564	928506	982470	924539	1.18002e+06	1.09361e+06	1.03569e+06	1.11085e+06	1.02477e+06	1.58229	0.00420385	1.7387	0.798008	insig
MW0142981	C35H36MgN4O6	3-Hydroxyethylchlorophyllide a	Heterocyclic compounds	Heterocyclic compounds	MS2-Insilico	0.7207	-	549791	1.16884e+06	913298	743196	739157	2.03971e+06	795321	554730	962544	542356	470433	393099	236439	483568	412491	266570	246272	590464	657877	288740	297214	1.33018e+06	501132	117912	217135	1.6218	0.0113096	0.481709	-1.05377	down
MW0142960	C5H9O7P	3-Hydroxy-5-phosphonooxypentane-2,4-dione	Aldehyde,Ketones,Esters	Ketones	MS2-MetDNA	0.5619	-	65557.2	181796	262754	251060	75220.2	235925	116203	107850	260352	245210	298736	94392.1	312115	325798	355166	408849	425997	378464	391557	408350	391717	426487	381363	380600	398832	1.80085	3.26163e-05	1.98988	0.99268	insig
MW0013710	C23H44O5	3-(Acetyloxy)-2-hydroxypropyl octadecanoate	GL	DG	MS2-Insilico	0.619	-	443052	474372	443598	463968	418098	429550	422672	436027	420097	439535	464714	393653	453554	451485	372108	365647	384723	370818	381572	368968	378615	385394	372930	362732	366629	1.62145	0.000204192	0.891761	-0.165272	insig
MW0119149	C12H6Cl4N2	3,3',4,4'-Tetrachloroazobenzene	Benzene and substituted derivatives	Benzene and substituted derivatives	MS2-Insilico	0.6431	-	2.3512e+06	2.43307e+06	2.20539e+06	2.48867e+06	2.4032e+06	2.3824e+06	2.3823e+06	2.50175e+06	2.70926e+06	2.47187e+06	2.41497e+06	2.2741e+06	2.49385e+06	1.83519e+06	2.59385e+06	3.01707e+06	2.84949e+06	3.10774e+06	2.69957e+06	2.13323e+06	2.59809e+06	3.11913e+06	2.13202e+06	2.37358e+06	2.56865e+06	0.409009	0.288925	1.04705	0.0663241	insig
MW0142640	C27H36O7	3,16-DIDEOXYMEXICANOLIDE-3-DIOL	Others	Others	MS2-Search-DB	0.7351	-	462.043	23067.9	2206.59	56260	153564	2120.23	27852.8	119605	165344	1080.54	8506.37	34282.2	59478	12473.9	130102	56710.2	302091	223774	1446.21	1811.36	90863.2	43680.5	240169	366.709	24090.7	0.517695	0.421464	1.4865	0.571915	insig
MW0013368	C29H50O6	28-Homobrassinolide	Aldehyde,Ketones,Esters	Esters	MS2-Insilico	0.7268	-	1.12008e+06	1.21384e+06	1.24726e+06	1.23008e+06	1.20106e+06	1.12262e+06	1.13096e+06	1.13124e+06	1.16529e+06	1.14999e+06	1.25171e+06	1.03697e+06	1.28901e+06	1.27989e+06	1.2202e+06	1.20052e+06	1.2596e+06	1.14758e+06	1.13921e+06	1.26681e+06	1.22613e+06	1.2757e+06	1.2356e+06	1.20072e+06	1.10004e+06	0.874965	0.136075	1.03193	0.0453518	insig
MEDN1229	C6H6O4	2-Oxo-2,3-dihydrofuran-5-acetate	Organic acid And Its derivatives	Esters	MS2-Search-Local	0.7081	-	29724.1	24303.9	19481.2	72686.8	16532	12190.4	52087.5	47300.4	34721.3	32806.7	86742.3	68557.5	60919.3	95281.5	78280	103245	109110	101992	90829.4	95115.5	106860	46763.1	92063	105154	60555.4	2.13005	1.26847e-06	2.5382	1.34381	up
MW0112234	C12H24O	2-Methylundecanal	Aldehyde,Ketones,Esters	Aldehydes	MS2-Insilico	0.7093	-	334416	610590	498690	204794	555953	588116	348365	195488	215091	174964	218394	175212	197893	188964	181642	220999	202603	195390	211908	351756	576837	346297	218181	196773	191781	1.12602	0.0594349	0.657393	-0.605171	insig
MW0112211	C8H16O	2-Methyl-3-heptanone	Aldehyde,Ketones,Esters	Ketones	MS2-Insilico	0.7105	-	433161	428894	247251	243068	422717	660085	411087	256154	245834	226497	406389	414882	260634	248664	394122	583055	399973	734480	683142	220840	645077	214824	687194	700189	648745	0.760368	0.0729911	1.35062	0.433626	insig
MW0142443	C7H7IO	2-Iodophenol methyl ether	Benzene and substituted derivatives	Phenolics	MS2-Insilico	0.6837	-	595342	492433	388844	604180	432893	413859	558796	424743	517861	390626	514582	576243	1.00796e+06	385432	342861	536170	451024	466305	421261	167231	439625	368920	278121	283643	383340	0.482289	0.474935	0.916086	-0.126445	insig
MW0142365	C14H10O4	2-Hydroxy-2H-benzo[h]chromene-2-carboxylate	Organic acid And Its derivatives	Organic acid And Its derivatives	MS2-MetDNA	0.5933	-	1359.59	1470.46	2843.59	1926.97	1644.58	1498.9	835.819	1019.6	2324	1793.98	1776.95	2051.59	1749.96	1801.6	893.983	740.764	1131.38	1061.87	1067.2	1022.43	2213.93	1003.54	1143.83	1668.12	1541.97	0.645712	0.224713	0.832227	-0.264951	insig
MW0117984	C6H12O2S2	2,5-Dimethyl-1,4-dithiane-2,5-diol	Alcohol and amines	Alcohols	MS2-Insilico	0.6653	-	4.41663e+06	3.91608e+06	4.00496e+06	3.41516e+06	3.45019e+06	3.9384e+06	4.05105e+06	3.78396e+06	7.34339e+06	3.45361e+06	3.94587e+06	5.19457e+06	3.91325e+06	3.64287e+06	3.22674e+06	4.31254e+06	5.46419e+06	3.83367e+06	4.37868e+06	3.38605e+06	3.81056e+06	4.5366e+06	3.61389e+06	5.81469e+06	3.75688e+06	0.0623617	0.978528	1.00273	0.00392961	insig
MW0013090	C27H50O6	2,3-bis(Acetyloxy)propyl icosanoate	GL	TG	MS2-Insilico	0.5585	-	302079	327882	344216	259722	282136	246791	215904	340532	394547	327302	290192	392305	284223	315978	409013	394738	441356	394007	390754	380781	308687	324669	349875	384312	426368	1.32049	0.00930838	1.20291	0.266525	insig
MW0104394	C6H3Cl3O5	2,3,5-Trichloromaleylacetate	Organic acid And Its derivatives	Organic acid And Its derivatives	MS2-Insilico	0.5284	-	2.63231e+06	1.82457e+06	2.32511e+06	2.53155e+06	2.48025e+06	378346	1.64271e+06	387473	880980	395818	820481	871092	462446	1.62976e+06	757402	814922	727807	801532	707092	315311	746578	263390	754809	737549	717806	1.00799	0.0266986	0.479268	-1.0611	down
MW0141675	C19H28O6S	19-hydroxy-17-oxoandrost-5-en-3-yl sulfate	Others	Others	MS2-Search-DB	0.8602	-	343019	1.28664e+06	685696	1.14888e+06	444420	43635.3	374706	3.2913e+06	333447	569502	1.085e+06	166685	7.4911e+06	2.60707e+06	174475	540801	877971	849786	765634	634885	1.01712e+06	132622	1.2507e+06	751394	654827	0.589111	0.463844	1.48649	0.571906	insig
MW0141487	C26H40O6	16-Feruloyloxypalmitate	Organic acid And Its derivatives	Organic acid And Its derivatives	MS2-MetDNA	0.7863	-	486247	479167	541858	580763	559951	469961	683957	397424	867751	677615	576824	878629	1.05293e+06	536527	1.12564e+06	806375	1.05832e+06	858216	1.03359e+06	526989	606597	734310	389200	375626	675813	0.978096	0.0340648	1.30388	0.38281	insig
MW0012991	C44H79O10P	1-Stearoyl-2-arachidonoyl-sn-glycero-3-phospho-(1'-sn-glycerol)	GP	PG	MS2-Search-DB	0.5753	-	17517.8	199979	364627	279269	442576	268047	63259.6	49127.3	32381.4	44340.7	76026.5	61198.1	87692.4	83013.5	239725	296985	296745	268252	228218	433648	157608	153944	149210	124730	174070	0.683682	0.825185	1.07169	0.0998862	insig
MW0110625	C26H54NO6PS	1-O-Hexadecyl-2-deoxy-2-thio-S-acetyl-sn-glyceryl-3-phosphorylcholine	Organic acid And Its derivatives	Phosphoric acids	MS2-Search-DB	0.6729	-	249891	174022	300085	167649	227439	371952	291712	218702	354792	194913	327023	362304	353365	350741	552392	729414	444863	581780	423342	384798	460968	268110	342227	348191	446895	1.87429	0.000191825	1.66628	0.73663	insig
MW0011906	C43H82NO8P	1,2-Dioleoyl-sn-glycero-3-phosphoethanolamine-N,N-dimethyl	GP	PI	MS2-Search-DB	0.7173	-	1323.66	141.165	46003.5	82216.9	137171	89647	130721	111356	53138.3	22735.2	29616	28936.9	20901.2	32287.4	54832	46253.3	19794.6	14946.8	27566.9	101686	149222	143493	65023.9	60603.2	51123.3	0.404047	0.57829	0.836515	-0.257537	insig
MW0117242	C29H35NO5	1'-O-Acetylpaxilline	Heterocyclic compounds	Heterocyclic compounds	MS2-Insilico	0.5032	-	26004.9	29023.4	25734.2	31909.4	57195.1	32024.4	28962.2	30123.6	30583.5	25725.7	29471.3	32705	47628	32796.8	35759.5	36367	47779.1	36815.2	37930.2	66335	36090.4	35387.5	77053.6	35800.1	38770.4	1.28555	0.0356648	1.31677	0.397002	insig
MW0000770	C7H7IO	(alpha-D-mannosyl)7-beta-D-mannosyl-diacetylchitobiosyl-L-asparagine,isoform B(protein)	Benzene and substituted derivatives	Phenolics	MS2-Insilico	0.6814	-	62449.4	63235.2	138791	506306	516277	483618	547578	653823	750317	637327	605756	601303	561056	477987	490404	485708	459684	418919	507621	472426	432522	399660	450773	458504	502227	0.821767	0.53705	1.12003	0.163541	insig
MW0128408	C16H28O2	(Z)-7-Hexadecen-1,16-olide	Heterocyclic compounds	Heterocyclic compounds	MS2-Insilico	0.8112	-	1.42791e+06	87018.9	44561.2	1.10683e+06	830264	248541	1.72661e+06	882658	304055	95350.8	779499	249961	945012	479911	384378	574205	57030.4	783860	389519	184997	349042	542643	241773	186231	417079	0.0224191	0.265911	0.648045	-0.625834	insig
MW0140668	C6H6O4	(S)-5-Oxo-2,5-dihydrofuran-2-acetate	Aldehyde,Ketones,Esters	Esters	MS2-MetDNA	0.8153	-	505648	485862	449908	514005	661026	412288	546418	610355	453487	441430	500585	475847	442839	399997	529732	226245	197076	393543	179065	407922	673929	386517	526683	386315	468025	1.05122	0.0352015	0.812834	-0.298967	insig
MW0140648	C3H9O4P	(S)-2-Hydroxypropylphosphonate	Organic acid And Its derivatives	Organic acid And Its derivatives	MS2-Insilico	0.5221	-	895421	936012	875011	855838	875789	879491	377493	867306	385747	368562	360296	431239	864796	373599	373625	320514	404233	318062	351532	344674	401767	681237	807254	371422	364638	1.41804	0.00712012	0.616755	-0.697231	insig
MW0140438	C6H7O6P	(5-Formylfuran-3-yl)methyl phosphate	Organic acid And Its derivatives	Organic acid And Its derivatives	MS2-Insilico	0.6421	-	479228	252542	415624	395973	317660	292158	325528	341199	369984	279704	244011	354840	495345	436882	301818	322977	245154	298637	470061	386828	339675	500244	290730	386053	468260	0.336959	0.482978	1.06477	0.0905481	insig
MW0011221	C28H46O4	(3beta,5alpha,6beta,7alpha,22E,24R)-Ergosta-8,22-diene-3,5,6,7-tetrol	Alcohol and amines	Alcohols	MS2-Insilico	0.8479	-	267461	28857.6	282608	38740.7	25071.1	13966.9	429032	81280.3	558168	202044	454436	436909	212099	1.30363e+06	398610	359184	214752	261389	402667	71947.1	338270	1.73093e+06	502848	568205	499171	1.45101	0.0188592	2.68262	1.42364	up
