# Supplementary material for: Linoleic acid promotes TF expression through PPAR-α, which leads to tumor progression in primary pulmonary lymphoepithelioma-like carcinoma
Source: Research Square preprint supplement (doi:10.21203/rs.3.rs-5704972/v1), 2025-01-10
Supplement: Supplementary file 9 [file 5dd27a1f0d29746152a7a196.xlsx]

## Sheet: pLELC-CON
Supplementary Table4.Sixteen Proteins exhibited differential expression between the pLELC and CON group.
Index	Accession	Description	Gene	MolecularWeight	ProteinGroups	Qvalue	Peptides Number	Peptides	Length	Isoelectric Point	GRAVY	Protein Sequence	CON1	CON2	CON3	CON4	CON5	pLELC1	pLELC2	pLELC3	pLELC4	pLELC5	CON	CON_CV	pLELC	pLELC/CON	pLELC/CON_DiffStat	pLELC/CON_pvalue	pLELC_CV
48	O75882	Attractin OS=Homo sapiens OX=9606 GN=ATRN PE=1 SV=2	ATRN	158536	O75882	0	11	YQGNPLR;IYMYGGK;LADDLYR;LTGSSGFVTDGPGNYK;EEYSNLKLPR;NHNALLASLTTQK;SVNNVVVR;IMQSSQSMSK;YGHSLALYK;DLDMFINASK;ALYVHGGYK	1429	7.24	-0.278446	MVAAAAATEARLRRRTAATAALAGRSGGPHWDWDVTRAGRPGLGAGLRLPRLLSPPLRPRLLLLLLLLSPPLLLLLLPCEAEAAAAAAAVSGSAAAEAKECDRPCVNGGRCNPGTGQCVCPAGWVGEQCQHCGGRFRLTGSSGFVTDGPGNYKYKTKCTWLIEGQPNRIMRLRFNHFATECSWDHLYVYDGDSIYAPLVAAFSGLIVPERDGNETVPEVVATSGYALLHFFSDAAYNLTGFNITYSFDMCPNNCSGRGECKISNSSDTVECECSENWKGEACDIPHCTDNCGFPHRGICNSSDVRGCSCFSDWQGPGCSVPVPANQSFWTREEYSNLKLPRASHKAVVNGNIMWVVGGYMFNHSDYNMVLAYDLASREWLPLNRSVNNVVVRYGHSLAL…	1.18984e+06	1.2393e+06	1.07824e+06	1.06384e+06	1.08139e+06	1.27368e+06	1.39652e+06	1.24626e+06	1.44289e+06	1497901	1.13052e+06	0.0699	1.37145e+06	1.21311	up	0.00346119	0.079
51	P00450	Ceruloplasmin OS=Homo sapiens OX=9606 GN=CP PE=1 SV=1	CP	122204	P00450	0	33	ALYLQYTDETFR;MYYSAVDPTK;RQSEDSTFYLGER;HYYIGIIETTWDYASDHGEK;KAEEEHLGILGPQLHADVGDK;MFTTAPDQVDKEDEDFQESNK;EYTDASFTNRK;KALYLQYTDETFR;EYTDASFTNR;AETGDKVYVHLK;IYHSHIDAPK;QSEDSTFYLGER;QYTDSTFRVPVER;TYSDHPEKVNKDDEEFIESNK;AEEEHLGILGPQLHADVGDKVK;VDKDNEDFQESNR;GEFYIGSK;NLASRPYTFHSHGITYYK;TYYIAAVEVEWDYSPQR;VNKDDEEFIESNK;TYYIAAVEVEWDYSPQREWEK;QYTDSTFR;FNKNNEGTYYSPNYNPQSR;GAYPLSIEPIGVR;KAEEEHLGILGPQLHADVGDKVK;…	1065	5.44	-0.535962	MKILILGIFLFLCSTPAWAKEKHYYIGIIETTWDYASDHGEKKLISVDTEHSNIYLQNGPDRIGRLYKKALYLQYTDETFRTTIEKPVWLGFLGPIIKAETGDKVYVHLKNLASRPYTFHSHGITYYKEHEGAIYPDNTTDFQRADDKVYPGEQYTYMLLATEEQSPGEGDGNCVTRIYHSHIDAPKDIASGLIGPLIICKKDSLDKEKEKHIDREFVVMFSVVDENFSWYLEDNIKTYCSEPEKVDKDNEDFQESNRMYSVNGYTFGSLPGLSMCAEDRVKWYLFGMGNEVDVHAAFFHGQALTNKNYRIDTINLFPATLFDAYMVAQNPGEWMLSCQNLNHLKAGLQAFFQVQECNKSSSKDNIRGKHVRHYYIAAEEIIWNYAPSGIDIFTKENLT…	32367704	28332044	40652560	34034208	31930484	18753694	26849124	32188756	26214498	24266956	33463400	0.1352	2.56546e+07	0.766647	down	0.0320418	0.1889
54	P00738	Haptoglobin OS=Homo sapiens OX=9606 GN=HP PE=1 SV=1	HP	45205.1	P00738	0	26	DIAPTLTLYVGKK;TEGDGVYTLNNEK;HYEGSTVPEK;TEGDGVYTLNDKKQWINK;TEGDGVYTLNNEKQWINK;LRTEGDGVYTLNNEK;NPANPVQR;LRTEGDGVYTLNDK;VTSIQDWVQK;QKVSVNER;HYEGSTVPEKKTPK;LRTEGDGVYTLNDKK;DIAPTLTLYVGK;LKQKVSVNER;VVLHPNYSQVDIGLIK;ILGGHLDAK;QLVEIEK;LRTEGDGVYTLNNEKQWINK;GSFPWQAK;TEGDGVYTLNDK;VMPICLPSKDYAEVGR;DYAEVGR;HYEGSTVPEKK;KQLVEIEK;VGYVSGWGR;TEGDGVYTLNDKK	406	6.13	-0.421182	MSALGAVIALLLWGQLFAVDSGNDVTDIADDGCPKPPEIAHGYVEHSVRYQCKNYYKLRTEGDGVYTLNDKKQWINKAVGDKLPECEADDGCPKPPEIAHGYVEHSVRYQCKNYYKLRTEGDGVYTLNNEKQWINKAVGDKLPECEAVCGKPKNPANPVQRILGGHLDAKGSFPWQAKMVSHHNLTTGATLINEQWLLTTAKNLFLNHSENATAKDIAPTLTLYVGKKQLVEIEKVVLHPNYSQVDIGLIKLKQKVSVNERVMPICLPSKDYAEVGRVGYVSGWGRNANFKFTDHLKYVMLPVADQDQCIRHYEGSTVPEKKTPKSPVGVQPILNEHTFCAGMSKYQEDTCYGDAGSAFAVHDLEEDTWYATGILSFDKSCAVAEYGVYVKVTSIQDWV…	392990688	346281696	597054208	617879424	353303104	61697944	169275376	327729920	261875072	187485040	461501824	0.2917	2.01613e+08	0.436862	down	0.0179881	0.4982
65	P01011	Alpha-1-antichymotrypsin OS=Homo sapiens OX=9606 GN=SERPINA3 PE=1 SV=2	SERPINA3	47650.4	P01011	0	19	MEEVEAMLLPETLKR;LYGSEAFATDFQDSAAAK;RLYGSEAFATDFQDSAAAKK;ADLSGITGAR;WRDSLEFR;WEMPFDPQDTHQSR;AVLDVFEEGTEASAATAVK;GTHVDLGLASANVDFAFSLYK;ITLLSALVETR;LYGSEAFATDFQDSAAAKK;LINDYVK;AKWEMPFDPQDTHQSR;RLYGSEAFATDFQDSAAAK;EQLSLLDRFTEDAK;EQLSLLDRFTEDAKR;EQLSLLDR;NLAVSQVVHK;EIGELYLPK;GKITDLIK	423	5.33	-0.0652482	MERMLPLLALGLLAAGFCPAVLCHPNSPLDEENLTQENQDRGTHVDLGLASANVDFAFSLYKQLVLKAPDKNVIFSPLSISTALAFLSLGAHNTTLTEILKGLKFNLTETSEAEIHQSFQHLLRTLNQSSDELQLSMGNAMFVKEQLSLLDRFTEDAKRLYGSEAFATDFQDSAAAKKLINDYVKNGTRGKITDLIKDLDSQTMMVLVNYIFFKAKWEMPFDPQDTHQSRFYLSKKKWVMVPMMSLHHLTIPYFRDEELSCTVVELKYTGNASALFILPDQDKMEEVEAMLLPETLKRWRDSLEFREIGELYLPKFSISRDYNLNDILLQLGIEEAFTSKADLSGITGARNLAVSQVVHKAVLDVFEEGTEASAATAVKITLLSALVETRTIVRFNRPF…	28241354	35053592	41724132	35781456	31623104	22940650	24439868	31079608	23994536	25394962	3.44847e+07	0.1461	2.55699e+07	0.741485	down	0.00770216	0.1253
115	P02743	Serum amyloid P-component OS=Homo sapiens OX=9606 GN=APCS PE=1 SV=2	APCS	25386.9	P02743	0	9	AYSLFSYNTQGR;IVLGQEQDSYGGKFDR;DNELLVYK;DNELLVYKER;QGYFVEAQPK;VGEYSLYIGR;AYSDLSR;IVLGQEQDSYGGK;AYSLFSYNTQGRDNELLVYK	223	6.1	-0.0784753	MNKPLLWISVLTSLLEAFAHTDLSGKVFVFPRESVTDHVNLITPLEKPLQNFTLCFRAYSDLSRAYSLFSYNTQGRDNELLVYKERVGEYSLYIGRHKVTSKVIEKFPAPVHICVSWESSSGIAEFWINGTPLVKKGLRQGYFVEAQPKIVLGQEQDSYGGKFDRSQSFVGEIGDLYMWDSVLPPENILSAYQGTPLPANILDWQALNYEIRGYVIIKPLVWV	9654987	11134258	13548698	8418024	7549828	5544410	7545246	6.91688e+06	6802413	8026875	10061159	0.2357	6.96717e+06	0.692481	down	0.0190143	0.1345
119	P02748	Complement component C9 OS=Homo sapiens OX=9606 GN=C9 PE=1 SV=2	C9	63172.7	P02748	0	14	KYAFELK;DGNTLTYYR;NRDVVLTTTFVDDIK;RPWNVASLIYETK;TSNFNAAISLK;ALPTTYEK;AIEDYINEFSVR;TEHYEEQIEAFK;VVEESELAR;DRVVEESELAR;DVVLTTTFVDDIK;DRDGNTLTYYR;LSPIYNLVPVK;FTPTETNK	559	5.43	-0.450447	MSACRSFAVAICILEISILTAQYTTSYDPELTESSGSASHIDCRMSPWSEWSQCDPCLRQMFRSRSIEVFGQFNGKRCTDAVGDRRQCVPTEPCEDAEDDCGNDFQCSTGRCIKMRLRCNGDNDCGDFSDEDDCESEPRPPCRDRVVEESELARTAGYGINILGMDPLSTPFDNEFYNGLCNRDRDGNTLTYYRRPWNVASLIYETKGEKNFRTEHYEEQIEAFKSIIQEKTSNFNAAISLKFTPTETNKAEQCCEETASSISLHGKGSFRFSYSKNETYQLFLSYSSKKEKMFLHVKGEIHLGRFVMRNRDVVLTTTFVDDIKALPTTYEKGEYFAFLETYGTHYSSSGSLGGLYELIYVLDKASMKRKGVELKDIKRCLGYHLDVSLAFSEISVGAE…	14976881	11991782	15944802	13710763	12388355	5919112	7.58028e+06	12541887	7309006	9832918	1.38025e+07	0.1215	8.63664e+06	0.625729	down	0.00770017	0.3005
126	P02765	Alpha-2-HS-glycoprotein OS=Homo sapiens OX=9606 GN=AHSG PE=1 SV=2	AHSG	39340.4	P02765	0	4	HTLNQIDEVK;LDGKFSVVYAK;FSVVYAK;HTFMGVVSLGSPSGEVSHPR	367	5.43	-0.189646	MKSLVLLLCLAQLWGCHSAPHGPGLIYRQPNCDDPETEEAALVAIDYINQNLPWGYKHTLNQIDEVKVWPQQPSGELFEIEIDTLETTCHVLDPTPVARCSVRQLKEHAVEGDCDFQLLKLDGKFSVVYAKCDSSPDSAEDVRKVCQDCPLLAPLNDTRVVHAAKAALAAFNAQNNGSNFQLEEISRAQLVPLPPSTYVEFTVSGTDCVAKEATEAAKCNLLAEKQYGFCKATLSEKLGGAEVAVTCMVFQTQPVSSQPQPEGANEAVPTPVVDPDAPPSPPLGAPGLPPAGSPPDSHVLLAAPPGHQLHRAHYDLRHTFMGVVSLGSPSGEVSHPRKTRTVVQPSVGAAAGPVVPPCPGRIRHFKV	20932258	18444066	17109788	19042848	17964158	25638488	22024542	17444488	28599350	29437528	1.86986e+07	0.0767	2.46289e+07	1.31715	up	0.0342975	0.2013
132	P02787	Serotransferrin OS=Homo sapiens OX=9606 GN=TF PE=1 SV=3	TF	77063.2	P02787	0	33	EFQLFSSPHGKDLLFK;EDPQTFYYAVAVVKK;KSASDLTWDNLK;DGAGDVAFVK;DKSKEFQLFSSPHGK;NLNEKDYELLCLDGTR;HQTVPQNTGGKNPDPWAK;GDVAFVK;DSAHGFLK;EDPQTFYYAVAVVK;LHDRNTYEK;SKEFQLFSSPHGKDLLFK;SASDLTWDNLKGK;SKEFQLFSSPHGK;KDSGFQMNQLR;HSTIFENLANKADR;SASDLTWDNLK;DLLFKDSAHGFLK;EFQLFSSPHGK;EGYYGYTGAFR;LHDRNTYEKYLGEEYVK;MYLGYEYVTAIR;APNHAVVTR;HSTIFENLANK;TAGWNIPMGLLYNK;SMGGKEDLIWELLNQAQEHFGKDK;DSGFQMNQLR;DSAHGFLKVPPR;YLGEEYV…	698	6.81	-0.336246	MRLAVGALLVCAVLGLCLAVPDKTVRWCAVSEHEATKCQSFRDHMKSVIPSDGPSVACVKKASYLDCIRAIAANEADAVTLDAGLVYDAYLAPNNLKPVVAEFYGSKEDPQTFYYAVAVVKKDSGFQMNQLRGKKSCHTGLGRSAGWNIPIGLLYCDLPEPRKPLEKAVANFFSGSCAPCADGTDFPQLCQLCPGCGCSTLNQYFGYSGAFKCLKDGAGDVAFVKHSTIFENLANKADRDQYELLCLDNTRKPVDEYKDCHLAQVPSHTVVARSMGGKEDLIWELLNQAQEHFGKDKSKEFQLFSSPHGKDLLFKDSAHGFLKVPPRMDAKMYLGYEYVTAIRNLREGTCPEAPTDECKPVKWCALSHHERLKCDEWSVNSVGKIECVSAETTEDCIAK…	115096024	125590816	92018984	87855440	84402952	104256760	227471536	122270616	162893424	165078368	1.00993e+08	0.1807	1.56394e+08	1.54857	up	0.0293095	0.3042
141	P04196	Histidine-rich glycoprotein OS=Homo sapiens OX=9606 GN=HRG PE=1 SV=1	HRG	59578	P04196	0	12	RDGYLFQLLR;YKEENDDFASFRVDR;RRDGYLFQLLR;QIGSVYR;KGEVLPLPEANFPSFPLPHHK;VRGGEGTGYFVDFSVR;YKEENDDFASFR;GEVLPLPEANFPSFPLPHHK;ALDLINKR;GGEGTGYFVDFSVR;SSTTKPPFKPHGSR;DHHHPHKPHEHGPPPPPDER	525	7.09	-0.956762	MKALIAALLLITLQYSCAVSPTDCSAVEPEAEKALDLINKRRRDGYLFQLLRIADAHLDRVENTTVYYLVLDVQESDCSVLSRKYWNDCEPPDSRRPSEIVIGQCKVIATRHSHESQDLRVIDFNCTTSSVSSALANTKDSPVLIDFFEDTERYRKQANKALEKYKEENDDFASFRVDRIERVARVRGGEGTGYFVDFSVRNCPRHHFPRHPNVFGFCRADLFYDVEALDLESPKNLVINCEVFDPQEHENINGVPPHLGHPFHWGGHERSSTTKPPFKPHGSRDHHHPHKPHEHGPPPPPDERDHSHGPPLPQGPPPLLPMSCSSCQHATFGTNGAQRHSHNNNSSDLHPHKHHSHEQHPHGHHPHAHHPHEHDTHRQHPHGHHPHGHHPHGHHPHGH…	8781985	7.37784e+06	5318152	4.00031e+06	6421885	7903570	10287732	8528507	9303936	8277663	6.38003e+06	0.2886	8.86028e+06	1.38875	up	0.0366415	0.1071
149	P05154	Plasma serine protease inhibitor OS=Homo sapiens OX=9606 GN=SERPINA5 PE=1 SV=3	SERPINA5	45674.3	P05154	0	5	AVVEVDESGTR;AAAATGTIFTFR;TLYLADTFPTNFR;FSIEGSYQLEK;DFTFDLYR	406	9.3	-0.115271	MQLFLLLCLVLLSPQGASLHRHHPREMKKRVEDLHVGATVAPSSRRDFTFDLYRALASAAPSQSIFFSPVSISMSLAMLSLGAGSSTKMQILEGLGLNLQKSSEKELHRGFQQLLQELNQPRDGFQLSLGNALFTDLVVDLQDTFVSAMKTLYLADTFPTNFRDSAGAMKQINDYVAKQTKGKIVDLLKNLDSNAVVIMVNYIFFKAKWETSFNHKGTQEQDFYVTSETVVRVPMMSREDQYHYLLDRNLSCRVVGVPYQGNATALFILPSEGKMQQVENGLSEKTLRKWLKMFKKRQLELYLPKFSIEGSYQLEKVLPSLGISNVFTSHADLSGISNHSNIQVSEMVHKAVVEVDESGTRAAAATGTIFTFRSARLNSQRLVFNRPFLMFIVDNNILF…	478934	430679	205164	343096	325481	481189	463860	482808	695273	526333	356671	0.2958	529893	1.48566	up	0.0323688	0.1798
153	P05452	Tetranectin OS=Homo sapiens OX=9606 GN=CLEC3B PE=1 SV=3	CLEC3B	22536.7	P05452	0	3	SRLDTLAQEVALLK;LDTLAQEVALLK;GGTLGTPQTGSENDALYEYLR	202	5.52	-0.298515	MELWGAYLLLCLFSLLTQVTTEPPTQKPKKIVNAKKDVVNTKMFEELKSRLDTLAQEVALLKEQQALQTVCLKGTKVHMKCFLAFTQTKTFHEASEDCISRGGTLGTPQTGSENDALYEYLRQSVGNEAEIWLGLNDMAAEGTWVDMTGARIAYKNWETEITAQPDGGKTENCAVLSGAANGKWFDKRCRDQLPYICQFGIV	584469	468883	487578	172420	457022	759721	846519	917901	1.16197e+06	891086	434074	0.3563	915439	2.10894	up	0.00723295	0.1642
200	P19827	Inter-alpha-trypsin inhibitor heavy chain H1 OS=Homo sapiens OX=9606 GN=ITIH1 PE=1 SV=3	ITIH1	101388	P19827	0	23	GSLVQASEANLQAAQDFVR;RNHMQYEIVIK;GMADQDGLKPTIDKPSEDSPPLEMLGPR;FAHYVVTSQVVNTANEAR;QAVDTAVDGVFIR;QYYEGSEIVVAGR;LDAQASFLPK;EVAFDLEIPK;VTFQLTYEEVLK;KAAISGENAGLVR;ELAAQTIKK;NVVFVIDISGSMR;ERGHMLENHVER;VTYDVSR;GHMLENHVER;QLVHHFEIDVDIFEPQGISK;AAISGENAGLVR;NHMQYEIVIK;VTFQLTYEEVLKR;TMEQFTIHLTVNPQSK;VTYDVSRDK;DKVTAWK;RQAVDTAVDGVFIR	911	6.31	-0.281559	MDGAMGPRGLLLCMYLVSLLILQAMPALGSATGRSKSSEKRQAVDTAVDGVFIRSLKVNCKVTSRFAHYVVTSQVVNTANEAREVAFDLEIPKTAFISDFAVTADGNAFIGDIKDKVTAWKQYRKAAISGENAGLVRASGRTMEQFTIHLTVNPQSKVTFQLTYEEVLKRNHMQYEIVIKVKPKQLVHHFEIDVDIFEPQGISKLDAQASFLPKELAAQTIKKSFSGKKGHVLFRPTVSQQQSCPTCSTSLLNGHFKVTYDVSRDKICDLLVANNHFAHFFAPQNLTNMNKNVVFVIDISGSMRGQKVKQTKEALLKILGDMQPGDYFDLVLFGTRVQSWKGSLVQASEANLQAAQDFVRGFSLDEATNLNGGLLRGIEILNQVQESLPELSNHASILI…	6172503	8465736	5.4536e+06	5352275	5.67297e+06	7443404	8441772	8710887	7248041	7281833	6.22342e+06	0.2077	7.82519e+06	1.25738	up	0.0320281	0.089
212	P33151	Cadherin-5 OS=Homo sapiens OX=9606 GN=CDH5 PE=1 SV=5	CDH5	87527.7	P33151	0	2	YTFVVPEDTR;YEIVVEAR	784	5.22	-0.424872	MQRLMMLLATSGACLGLLAVAAVAAAGANPAQRDTHSLLPTHRRQKRDWIWNQMHIDEEKNTSLPHHVGKIKSSVSRKNAKYLLKGEYVGKVFRVDAETGDVFAIERLDRENISEYHLTAVIVDKDTGENLETPSSFTIKVHDVNDNWPVFTHRLFNASVPESSAVGTSVISVTAVDADDPTVGDHASVMYQILKGKEYFAIDNSGRIITITKSLDREKQARYEIVVEARDAQGLRGDSGTATVLVTLQDINDNFPFFTQTKYTFVVPEDTRVGTSVGSLFVEDPDEPQNRMTKYSILRGDYQDAFTIETNPAHNEGIIKPMKPLDYEYIQQYSFIVEATDPTIDLRYMSPPAGNRAQVIINITDVDEPPIFQQPFYHFQLKENQKKPLIGTVLAMDPD…	482044	301447	318963	172305	242430	425440	366867	464080	612843	418451	303438	0.3796	457536	1.50784	up	0.0440463	0.2043
214	P35542	Serum amyloid A-4 protein OS=Homo sapiens OX=9606 GN=SAA4 PE=1 SV=2	SAA4	14746.5	P35542	0	8	GNYDAAQR;FRPDGLPK;SGKDPDRFRPDGLPK;SNEKAEEWGR;SFFKEALQGVGDMGR;AYWDIMISNHQNSNR;GPGGVWAAK;EALQGVGDMGR	130	9.17	-0.519231	MRLFTGIVFCSLVMGVTSESWRSFFKEALQGVGDMGRAYWDIMISNHQNSNRYLYARGNYDAAQRGPGGVWAAKLISRSRVYLQGLIDCYLFGNSSTVLEDSKSNEKAEEWGRSGKDPDRFRPDGLPKKY	11181960	8128795	10654342	9927138	7.7487e+06	5.44249e+06	6476340	6346769	4.66426e+06	7.91582e+06	9.52819e+06	0.1599	6.16913e+06	0.647462	down	0.00508876	0.198
218	P43251	Biotinidase OS=Homo sapiens OX=9606 GN=BTD PE=1 SV=2	BTD	61132.4	P43251	0	2	LSSGLVTAALYGR;SHLIIAQVAK	543	5.81	-0.0316759	MAHAHIQGGRRAKSRFVVCIMSGARSKLALFLCGCYVVALGAHTGEESVADHHEAEYYVAAVYEHPSILSLNPLALISRQEALELMNQNLDIYEQQVMTAAQKDVQIIVFPEDGIHGFNFTRTSIYPFLDFMPSPQVVRWNPCLEPHRFNDTEVLQRLSCMAIRGDMFLVANLGTKEPCHSSDPRCPKDGRYQFNTNVVFSNNGTLVDRYRKHNLYFEAAFDVPLKVDLITFDTPFAGRFGIFTCFDILFFDPAIRVLRDYKVKHVVYPTAWMNQLPLLAAIEIQKAFAVAFGINVLAANVHHPVLGMTGSGIHTPLESFWYHDMENPKSHLIIAQVAKNPVGLIGAENATGETDPSHSKFLKILSGDPYCEKDAQEVHCDEATKWNVNAPPTFHSEMM…	676309	522884	515908	616434	537359	634090	785930	568651	856555	904718	573779	0.122	749989	1.3071	up	0.0375335	0.192
253	Q96PD5	N-acetylmuramoyl-L-alanine amidase OS=Homo sapiens OX=9606 GN=PGLYRP2 PE=1 SV=1	PGLYRP2	62216.4	Q96PD5	0	6	WGAAPYR;HTASAWLMSAPNSGPHNR;DGSPDVTTADIGANTPDATK;TFTLLDPK;AGLLRPDYALLGHR;GWHWVGAHTLGHNSR	576	7.25	-0.128993	MAQGVLWILLGLLLWSDPGTASLPLLMDSVIQALAELEQKVPAAKTRHTASAWLMSAPNSGPHNRLYHFLLGAWSLNATELDPCPLSPELLGLTKEVARHDVREGKEYGVVLAPDGSTVAVEPLLAGLEAGLQGRRVINLPLDSMAAPWETGDTFPDVVAIAPDVRATSSPGLRDGSPDVTTADIGANTPDATKGCPDVQASLPDAKAKSPPTMVDSLLAVTLAGNLGLTFLRGSQTQSHPDLGTEGCWDQLSAPRTFTLLDPKASLLTMAFLNGALDGVILGDYLSRTPEPRPSLSHLLSQYYGAGVARDPGFRSNFRRQNGAALTSASILAQQVWGTLVLLQRLEPVHLQLQCMSQEQLAQVAANATKEFTEAFLGCPAIHPRCRWGAAPYRGRPKL…	2.32764e+06	2.33903e+06	1.52848e+06	1.5883e+06	1.49018e+06	2.94716e+06	2663020	2.32749e+06	3.2184e+06	2.62154e+06	1.85472e+06	0.2363	2.75552e+06	1.48568	up	0.00782711	0.1232
