# Supplementary material for: Linoleic acid promotes TF expression through PPAR-α, which leads to tumor progression in primary pulmonary lymphoepithelioma-like carcinoma
Source: Research Square preprint supplement (doi:10.21203/rs.3.rs-5704972/v1), 2025-01-10
Supplement: Supplementary file 10 [file 67b991bfc1d3523e056599e2.xlsx]

## Sheet: Pathway annotation
Supplementary Table 7.Pathway annotation of the pLELC and CON group.
Acc	Gene ID	Description	Hyperlink
O75882	hsa:8455	ATRN, DPPT-L, MGCA; attractin	http://www.genome.jp/dbget-bin/www_bget?hsa:8455
P00450	hsa:1356	CP, AB073614, CP-2; ceruloplasmin	http://www.genome.jp/dbget-bin/www_bget?hsa:1356
P00738	hsa:3240	HP, BP, HP2ALPHA2, HPA1S; haptoglobin	http://www.genome.jp/dbget-bin/www_bget?hsa:3240
P01011	hsa:12	SERPINA3, AACT, ACT, GIG24, GIG25; serpin family A member 3	http://www.genome.jp/dbget-bin/www_bget?hsa:12
P02743	hsa:325	APCS, HEL-S-92n, PTX2, SAP; amyloid P component, serum	http://www.genome.jp/dbget-bin/www_bget?hsa:325
P02748	hsa:735	C9, ARMD15, C9D; complement C9	http://www.genome.jp/dbget-bin/www_bget?hsa:735
P02765	hsa:197	AHSG, A2HS, AHS, APMR1, FETUA, HSGA; alpha 2-HS glycoprotein	http://www.genome.jp/dbget-bin/www_bget?hsa:197
P02787	hsa:7018	TF, HEL-S-71p, PRO1557, PRO2086, TFQTL1; transferrin	http://www.genome.jp/dbget-bin/www_bget?hsa:7018
P04196	hsa:3273	HRG, HPRG, HRGP, THPH11; histidine rich glycoprotein	http://www.genome.jp/dbget-bin/www_bget?hsa:3273
P05154	hsa:5104	SERPINA5, PAI-3, PAI3, PCI, PCI-B, PLANH3, PROCI; serpin family A member 5	http://www.genome.jp/dbget-bin/www_bget?hsa:5104
P05452	hsa:7123	CLEC3B, TN, TNA; C-type lectin domain family 3 member B	http://www.genome.jp/dbget-bin/www_bget?hsa:7123
P19827	hsa:3697	ITIH1, H1P, IATIH, IGHEP1, ITI-HC1, ITIH, SHAP; inter-alpha-trypsin inhibitor heavy chain 1	http://www.genome.jp/dbget-bin/www_bget?hsa:3697
P33151	hsa:1003	CDH5, 7B4, CD144; cadherin 5	http://www.genome.jp/dbget-bin/www_bget?hsa:1003
P35542	hsa:6291	SAA4, C-SAA, CSAA; serum amyloid A4, constitutive	http://www.genome.jp/dbget-bin/www_bget?hsa:6291
P43251	hsa:686	BTD; biotinidase	http://www.genome.jp/dbget-bin/www_bget?hsa:686
Q96PD5	hsa:114770	PGLYRP2, HMFT0141, PGLYRPL, PGRP-L, PGRPL, TAGL-like, tagL, tagL-alpha, tagl-beta; peptidoglycan recognition protein 2	http://www.genome.jp/dbget-bin/www_bget?hsa:114770
