# Supplementary material for: Linoleic acid promotes TF expression through PPAR-α, which leads to tumor progression in primary pulmonary lymphoepithelioma-like carcinoma
Source: Research Square preprint supplement (doi:10.21203/rs.3.rs-5704972/v1), 2025-01-10
Supplement: Supplementary file 11 [file 8f525454bae82e81b59b5f90.xlsx]

## Sheet: Sheet1
Supplementary Table 9.Significant positive metabolites information the CON and pLELC group.
Index	Formula	Compounds	Class I	Class II	Precursor (g/mol)	Mass (g/mol)	RT (min)	Adduct	error_ppm	MS_level	score	source	CAS	Pubchem CID	HMDB	Metlin	cpd_ID	CON1	CON2	CON3	CON4	CON5	CON6	CON7	CON8	CON9	CON10	pLELC1	pLELC2	pLELC3	pLELC4	pLELC5	pLELC6	pLELC7	pLELC8	pLELC9	pLELC10	pLELC11	pLELC12	pLELC13	pLELC14	pLELC15	QC01	QC02	QC03	kegg_map	pos_pLELC_vs_CON_VIP	pos_pLELC_vs_CON_P-value	pos_pLELC_vs_CON_Fold_Change
MW0009570	C10H12O3	Propylparaben	Benzene and substituted derivatives	Benzene and substituted derivatives	181.085	180.079	5.8211	M+H	0.283779	MS2-Search-DB	0.7209	rp	94-13-3	7175	HMDB0032574	-	D01422	169669	142310	126112	120052	265306	245296	370257	371846	27838.2	21290.5	549344	225051	136761	934123	85522.1	242737	360782	859034	338881	1.15049e+06	295353	23050.1	720969	550883	263078	217999	219737	219681	--	1.07865	0.0122411	2.41439
MW0012934	C26H56NO6P	1-O-Hexadecyl-2-O-ethyl-sn-glycero-3-phosphocholine	GP	PC	576.331	509.385	10.807	M-2H+3Na	12.5945	MS2-Search-DB	0.6575	rp	78858-42-1	24779410	-	62939	-	25912.1	13095.7	4906.31	8973.07	13526.1	7894.26	13872.9	27135	28044.4	33331.9	32440.5	55230.9	58978.7	51378	58027.6	60898.1	68246.3	47240.9	37796.1	34507.2	31623.1	35677.9	33311.6	43408.3	28869.8	43804.7	43806.3	43323.7	--	2.10332	4.40324e-06	2.55675
MW0107691	C5H6N2O4	L-Dihydroorotic acid	Organic acid And Its derivatives	Organic acid And Its derivatives	197	158.033	2.5635	M+K	12.3214	MS2-Search-DB	0.6804	rp	5988-19-2	439216	HMDB0003349	64749	C00337	155708	772499	389069	200419	703148	748797	381273	680377	719556	166498	170359	34702.8	230956	124389	203190	217610	173457	247696	248297	399042	292682	456963	200434	47309.1	134142	276567	295070	266582	ko00240,ko01100,ko01240	1.37617	0.00793198	0.431294
MW0110019	C4H8Cl3O4P	Trichlorfon	Others	Insecticide	529.889	255.923	12.0142	2M+NH4	18.6039	MS2-Search-DB	0.6043	rp	52-68-6	5853	-	2920	C07971	7310.45	4872.91	3220.92	11557.3	4485.01	6302.64	7368.13	6047.92	7402.84	10103.4	11865.5	22703.7	14956.3	15786.9	16728	15675.2	18178.6	19058.6	12703.1	8099.5	19455.2	13953.5	13126.4	13686.5	13172.9	17558.3	18344.5	18255.1	--	2.20685	5.36328e-07	2.2246
MW0006695	C9H13N	Dextroamphetamine	Benzene and substituted derivatives	Benzene and substituted derivatives	136.112	135.105	11.6878	M+H	0.161774	MS2-Search-DB	0.8276	rp	51-64-9	5826	HMDB0015516	-	C07884	316539	95452.7	66922.4	100759	232567	100045	121808	317542	150426	216158	489893	410156	354495	517697	546677	258065	318651	222075	409529	189550	203672	262886	414706	354355	275333	282006	279554	264702	--	1.80992	0.00034018	2.02836
MW0011902	C44H84NO8P	1,2-dioleoyl-sn-glycero-3-phosphatidylcholine	GP	PC	786.6	785.593	9.9846	M+H	1.87441	MS2-Search-DB	0.9292	rp	4235-95-4	10350317	HMDB0062690	-	-	6.40537e+06	6.46722e+06	5.38675e+06	4.15645e+06	2.89224e+06	741122	1.082e+06	9.41107e+06	2.45403e+06	9.8012e+06	6.65175e+06	5.05586e+06	3.59605e+06	1.46343e+06	445234	308921	240228	622477	444295	1.46275e+06	487234	587862	852845	892749	977805	1.29313e+06	1.26042e+06	1.37915e+06	--	1.65773	0.0119208	0.329109
MW0056964	C46H84NO8P	PC(18:0/20:4(5Z,8Z,11Z,14Z))	GP	PC	809.585	809.593	12.0501	M+	12.4001	MS2-Search-DB	0.8209	rp	35418-59-8	16219824	HMDB0008048	45201	-	181427	325995	278939	220953	224378	111626	215107	271155	382157	220559	202772	224772	145001	154138	123709	29345	28547.6	28069.8	84684.5	50546.4	139072	48482.1	63418.3	35816.4	42637.8	108844	108190	103211	--	1.89214	8.13378e-05	0.384002
MEDN0067	C18H20N2O3	Phe-Phe	Amino acid and Its metabolites	Small Peptide	313.155	312.147	3.233	M+H	1.89136	MS2-Search-Local	0.9516	rp	201023-39-4	65104	HMDB0013302	-	-	4.21933e+06	2.30681e+06	1.41527e+06	3.50882e+06	7.8685e+06	7.51799e+06	2.89378e+06	3.0228e+06	1.72028e+06	4.62654e+06	4.0682e+06	6.17864e+06	3.3263e+07	8.465e+06	8.77699e+06	1.36003e+07	5.57417e+06	6.94281e+06	8.19174e+06	9.18289e+06	1.54662e+07	5.40261e+06	4.52931e+06	2.51453e+06	4.87069e+06	4.76026e+06	4.75674e+06	4.76155e+06	--	1.61416	0.0213826	2.33634
MW0110915	C44H82NO6PS	Arachidonoyl thio-PC	Benzene and substituted derivatives	Benzene and substituted derivatives	784.583	783.56	9.9574	M+H	18.6452	MS2-Search-DB	0.7899	rp	146797-82-2	53394300	-	63010	-	1.93953e+06	1.46656e+06	5.01047e+06	2.78918e+06	2.96321e+06	7.81278e+06	1.61765e+06	5.60862e+06	2.58495e+06	1.27544e+06	765952	268527	213026	661950	296459	300444	985851	1.13194e+06	445291	5.25858e+06	882426	2.91458e+06	2.96735e+06	852908	1.8246e+06	633745	609179	732496	--	1.57685	0.0216751	0.398565
MEDL00773	C13H16N2O5	L-Aspartyl-L-Phenylalanine	Amino acid and Its metabolites	Amino acid and Its metabolites	281.113	280.106	2.293	M+H	0.0518311	MS2-Search-Local	0.9008	rp	13433-09-5	93078	HMDB0000706	64957	-	318255	148526	39544.1	216752	641935	773983	183701	296941	169444	315660	227061	644545	2.46166e+06	826212	1.11273e+06	1.63285e+06	798793	407356	627768	507399	1.58471e+06	429959	183216	109285	145246	378769	378584	377713	--	1.26964	0.0212416	2.51203
MW0052616	C22H42O2	Erucic acid	FA	FFA	303.304	338.318	10.852	M+H-2H2O	0.95	MS2-MetDNA	0.9073	rp	112-86-7	5281116	HMDB0002068	3555	C08316	2859.18	609.504	350.804	390.07	323.333	87.3127	1086.99	855.893	1243.79	2444.66	1194.78	1360.57	2337.42	5591.05	1064.48	3089.57	2270.74	2014.95	974.54	793.984	1737.05	1953.13	1605.64	1017.9	4119.12	4829.04	4855.55	4818.53	ko01040	1.47805	0.0290314	2.02408
MW0060767	C44H86NO8P	PE-NMe2(22:1(13Z)/15:0)	GP	PE	832.581	787.609	10.1043	M-H+2Na	0.948857	MS2-MetDNA	0.8854	rp	-	131821546	HMDB0114439	-	-	425432	627768	224901	52665.7	104675	550024	304786	469069	141976	146878	273203	94846.1	64454.9	24004.7	17457.8	9801.33	1345.68	11359.8	249594	108463	19221.1	21407.8	43641.4	47232.9	272290	55093.8	56407.4	55469.3	--	1.68517	0.00754538	0.275208
MW0060349	C45H78NO8P	PE-NMe2(18:1(11Z)/20:5(5Z,8Z,11Z,14Z,17Z))	GP	PE	876.515	791.547	12.1129	M+K+HCOOH	0.182541	MS2-MetDNA	0.8551	rp	-	131821137	HMDB0114028	-	-	1584.18	11302.2	7738.93	7538.82	18298.1	26339.4	22416	13549.6	3510.65	4460.57	1515.89	6346.81	1330.85	2510.6	3140.27	721.644	1252.49	503.418	5870.28	12590.7	11987.5	6014.53	2273.19	5627.08	9423.71	3118.04	3209.19	3206.39	--	1.25349	0.031555	0.406087
MW0059450	C44H84NO8P	PE-NMe(18:1(9Z)/20:1(11Z))	GP	PE	786.6	785.593	7.8222	M+H	1.09331	MS2-MetDNA	0.8508	rp	-	131820263	HMDB0113148	-	-	479117	440586	235431	408504	8692.07	225110	299566	336646	874986	670961	365154	427635	482580	164770	136369	135937	11530.1	13760	23296.8	1914.62	222654	205207	147620	151102	7145.11	248799	232784	237893	--	1.06858	0.0183329	0.418246
MW0059430	C46H86NO8P	PE-NMe(18:1(11Z)/22:2(13Z,16Z))	GP	PE	834.596	811.609	12.0457	M+Na	2.40834	MS2-MetDNA	0.8016	rp	-	131820245	HMDB0113130	-	-	71647	60104.4	74089.1	97050.1	236618	313390	99470.4	179830	184801	136249	130665	154150	75122.8	54435.9	80350.1	67407.5	50267.1	35177.7	46404.8	31595.4	34517.4	30128.7	106490	101719	60750.2	49894.7	50676.9	50134.8	--	1.60739	0.0208173	0.485891
MW0059421	C44H84NO8P	PE-NMe(18:1(11Z)/20:1(11Z))	GP	PE	786.6	785.593	8.7901	M+H	0.839053	MS2-MetDNA	0.9415	rp	-	131820236	HMDB0113121	-	-	535986	462734	495308	1.00234e+06	289613	344512	322120	773411	487492	297333	692144	468491	368747	278931	137525	58479.9	38929.2	23379.1	106322	21298	77014.9	219520	6148.92	187265	92275.1	260913	256842	246035	--	1.67299	0.00224207	0.369394
MW0059363	C42H80NO8P	PE-NMe(16:1(9Z)/20:1(11Z))	GP	PE	796.529	757.562	12.0804	M+K	4.4443	MS2-MetDNA	0.878	rp	-	131820082	HMDB0112966	-	-	6290.42	34973.7	46497.7	31663.2	21978.2	25233.9	12501.3	5712.6	5823.37	5821.36	4987.1	4365.45	4496.5	4337.01	4920.9	1006.4	5408.35	5527.14	5099.54	21397.3	20001.9	8790.23	4988.83	5202.47	4519.92	4476.06	4631.37	4826.92	--	1.44347	0.0252622	0.356408
MW0059343	C44H84NO8P	PE-NMe(16:0/22:2(13Z,16Z))	GP	PE	824.558	785.593	12.0868	M+K	1.14001	MS2-MetDNA	0.9758	rp	-	131820169	HMDB0113054	-	-	13945.7	10106.4	10519.8	8455.39	6169.32	8305.69	16534.7	17767	18245.1	13541.2	15516.9	10868.4	8981.99	3861.88	3085.1	2860.47	1893.6	1582.96	4970.02	2555.45	2643.98	2861.72	3158.58	2753.92	2773.16	3947.23	3907.48	3821.24	--	2.03174	0.000246026	0.379577
MW0059315	C43H78NO8P	PE-NMe(15:0/22:4(7Z,10Z,13Z,16Z))	GP	PE	836.535	767.547	12.072	M+Na+HCOOH	7.88963	MS2-MetDNA	0.6859	rp	-	131820149	HMDB0113034	-	-	12154	18934	15386.5	7389.76	14422.1	4225.27	5187.4	1707.89	1739.84	2508.48	804.024	1207.78	4899.6	1999.87	1552.53	4810.29	2108.82	6895.85	2335.31	7440.59	5462.65	4286.68	5941.02	3552.95	2095.43	1058.7	1284.44	1174.39	--	1.01702	0.0477673	0.441442
MW0059262	C44H86NO8P	PE-NMe(14:0/24:1(15Z))	GP	PE	810.598	787.609	12.0143	M+Na	0.999262	MS2-MetDNA	0.9497	rp	-	131820113	HMDB0112998	-	-	645125	817653	134078	513043	1.40824e+06	1.42657e+06	1.15543e+06	282690	702517	243199	209019	993528	245089	117958	335310	438890	102245	175906	475690	231388	217430	193334	434109	83271.8	1.24291e+06	244111	242040	222901	--	1.28457	0.0493805	0.49997
MW0059254	C42H84NO8P	PE-NMe(14:0/22:0)	GP	PE	784.583	761.593	8.9108	M+Na	0.943176	MS2-MetDNA	0.9778	rp	-	131820105	HMDB0112990	-	-	1.06853e+06	2.80925e+06	2.4786e+06	5.53726e+06	1.41679e+07	1.02057e+07	2.99112e+06	4.24128e+06	2.31835e+06	1.08452e+06	31321.1	88267.8	58780.9	871662	97306.6	252402	1.20737e+06	1.73005e+06	341310	1.63167e+06	263815	2.75356e+06	2.76236e+06	2.08377e+06	1.51764e+06	127097	108722	132017	--	1.60162	0.024982	0.223034
MW0057180	C42H82NO8P	PC(20:0/14:1(9Z))	GP	PC	782.568	759.578	7.4334	M+Na	1.0095	MS2-MetDNA	0.9866	rp	-	52923053	HMDB0008263	-	-	28991.9	299833	412477	291626	119095	250982	147152	90684.4	6742.79	9275.99	5402.22	16144.4	8028.98	17540.7	25512.4	20916.5	35214.3	11410.2	29614.1	340699	163491	82205.5	20190.4	57798.4	7789.91	25676.4	26179.1	27297.4	--	1.05743	0.0464935	0.338777
MW0057020	C44H84NO8P	PC(18:1(9Z)/18:1(9Z))	GP	PC	808.581	785.593	8.4417	M+Na	1.80563	MS2-MetDNA	0.8929	rp	-	6437081	HMDB0000593	-	-	71099.9	193210	339630	266843	210077	276917	126115	118304	113693	121744	88476.9	84125.2	68135.6	50070.2	45724.4	54360.3	32625.6	32952.8	71448.6	86167.3	108828	78191.7	70035.3	51096.1	42513.5	59687.6	59058.6	58960.7	--	2.08163	0.00191335	0.349998
MW0056986	C44H84NO8P	PC(18:1(11Z)/18:1(11Z))	GP	PC	808.582	785.593	10.8096	M+Na	0.445223	MS2-MetDNA	0.9442	rp	-	24778895	HMDB0008070	-	-	810524	567893	180911	221687	802285	146172	167089	182691	140365	775505	146090	183633	131955	98451.2	81412.9	63761.2	70256.4	152010	114974	224332	156397	546287	402225	79525.2	69299.7	261896	212732	250248	--	1.42791	0.042166	0.420615
MW0056985	C44H86NO8P	PC(18:1(11Z)/18:0)	GP	PC	832.581	787.609	9.7404	M-H+2Na	1.06897	MS2-MetDNA	0.9602	rp	-	24778894	HMDB0008069	-	-	216879	514631	197535	44906.8	136264	327129	485403	267101	219871	169221	130112	64898.2	25713.4	8573.04	7629.56	1600.89	42453.4	11167.6	185222	58158.9	15787.3	7568.36	9812.12	30751.8	88783.5	19726	18985.1	21097.9	--	2.03189	0.00128139	0.177911
MW0056894	C44H84NO8P	PC(16:0/20:2(11Z,14Z))	GP	PC	808.581	785.593	7.4252	M+Na	1.68196	MS2-MetDNA	0.9278	rp	-	52922420	HMDB0007979	-	-	17092.5	80121.9	139507	113094	189058	67375.9	88187.3	56481.7	64246.4	54419	43674.1	39889.8	22869.5	17933.9	9482.46	7912.34	6963.27	6911.97	6905.8	3315.54	30908.9	29797.8	20750.9	16095.8	11280.7	20057.3	20379.6	18549.3	--	2.09002	0.00156495	0.210593
MW0056893	C44H86NO8P	PC(16:0/20:1(11Z))	GP	PC	810.6	787.609	10.8153	M+Na	1.83815	MS2-MetDNA	0.9544	rp	-	52922418	HMDB0007978	-	-	1.08085e+06	2.01548e+06	178874	437584	452570	1.15883e+06	1.4558e+06	1.25049e+06	4.14931e+06	853175	747862	482002	289560	114637	128534	116165	154193	597678	650904	156517	826301	178499	1.06653e+06	533664	794767	426142	458994	363619	--	1.46907	0.0445955	0.349771
MW0056834	C44H86NO8P	PC(14:1(9Z)/22:0)	GP	PC	832.581	787.609	10.8095	M-H+2Na	1.06897	MS2-MetDNA	0.9582	rp	-	52922290	HMDB0007919	-	-	294786	147240	32828.5	28578.2	72763.9	206358	207472	159513	153024	666807	123177	70425.6	24881.8	7599.44	34420.9	7709.33	3667.5	52426	112813	36773.3	5823.01	2629.93	23158.9	92047.3	128725	29330.2	29021.3	27193.9	--	1.67398	0.0324449	0.245858
MW0056795	C42H80NO8P	PC(14:0/20:2(11Z,14Z))	GP	PC	780.551	757.562	8.4339	M+Na	1.10179	MS2-MetDNA	0.9457	rp	-	52922228	HMDB0007880	-	-	107770	84241.3	239223	407021	217734	181093	152273	57391	30038.7	9504.82	10709.3	11538.4	14944.1	25317.2	53924.8	28906.4	28838.2	77937.1	35233.1	44957.9	156323	135812	74903.3	51740.9	77117.1	47724	47986.8	44325.7	--	1.11108	0.0378693	0.371485
MW0056679	C40H79O8P	PA(i-22:0/a-15:0)	GP	PA	760.581	718.551	8.4339	M+CH3CN+H	5.07504	MS2-MetDNA	0.8899	rp	-	131822560	HMDB0115904	-	-	353566	158933	491039	630969	430888	931843	1.60437e+06	1.48307e+06	855365	956725	724702	582303	350021	130030	114749	102474	106397	98803.2	624326	207325	343937	293593	196004	157852	500463	193055	193222	190120	--	1.64309	0.010599	0.382686
MW0056202	C42H83O8P	PA(22:0/i-17:0)	GP	PA	810.599	746.583	9.9722	M+CH3CN+Na	0.419443	MS2-MetDNA	0.9179	rp	-	131822329	HMDB0115673	-	-	1.15973e+07	7.1142e+06	2.23672e+06	2.64374e+06	1.18974e+06	3.63596e+06	3.47287e+06	1.22408e+07	1.97672e+06	2.04166e+06	5.94352e+06	3.93454e+06	847708	218224	259635	221222	351622	234901	3.16018e+06	491622	525123	790536	425857	593726	5.55397e+06	420446	422783	407569	--	1.75921	0.038053	0.3261
MW0056188	C47H81O8P	PA(22:0/22:6(4Z,7Z,10Z,13Z,16Z,19Z))	GP	PA	873.554	804.567	11.4184	M+Na+HCOOH	8.12765	MS2-MetDNA	0.7323	rp	-	52928636	HMDB0115266	-	-	185489	99343.4	298729	162489	181191	52882.2	281615	180725	221003	154705	417205	266876	510507	566098	525122	360982	255389	323467	455059	154575	112016	577989	610883	267831	300958	289471	288452	259829	--	1.60241	0.000363009	2.09183
MW0056179	C45H81O8P	PA(22:0/20:4(8Z,11Z,14Z,17Z))	GP	PA	849.564	780.567	12.0803	M+Na+HCOOH	2.35416	MS2-MetDNA	0.8458	rp	-	131822059	HMDB0115257	-	-	7945.29	2762.28	1613.22	3452.85	9851.01	14000	11005.3	8048.47	6101.27	6027.56	4511.81	3233.26	1011.46	1394.38	1049.25	383.298	1632.05	1306.54	3675.18	1493.03	1294.87	615.427	2477.45	5552.91	5231.96	871.51	1158.2	1064.66	--	1.82258	0.00372193	0.328242
MW0055896	C45H87O8P	PA(20:0/22:1(13Z))	GP	PA	853.555	786.614	12.0639	M-2H+3Na	13.8946	MS2-MetDNA	0.5419	rp	-	131821972	HMDB0115083	-	-	298.784	72.7559	433.129	337.582	371.626	2405.43	1832.1	2226.59	1350.32	2859	3043.55	2720.55	3191.07	2779.28	2298.5	4244.66	4154.41	1952.18	3081.45	2500.47	2611.07	1675.51	910.342	2588.42	2718.77	3971.2	3819.49	3936.61	--	1.70156	0.00169067	2.21379
MEDP1336	C28H49NO7P	LPC(0:0/20:5)	GP	LPC	542.323	542.325	7.6898	M+	14.8637	MS2-Search-Local	0.8784	rp	-	-	-	-	-	118372	179991	102252	130998	130207	129791	229759	148931	182384	39581.2	683919	127419	279673	634908	128876	1.08514e+06	109921	559743	188244	2.3188e+06	263933	268589	1.02961e+06	1.17469e+06	194810	343146	343992	341210	--	1.6773	0.00987856	4.33263
MW0050935	C47H78O5	DG(22:1(13Z)/22:6(4Z,7Z,10Z,13Z,16Z,19Z)/0:0)	GL	DG	786.6	722.585	8.434	M+CH3CN+Na	0.928044	MS2-MetDNA	0.9546	rp	-	9543962	HMDB0007643	-	-	526729	499958	471747	376367	440823	7780.29	337816	754340	819090	954869	686275	594798	476001	242756	160193	104183	91275.1	67385.1	113583	72391.6	269100	88693.8	97140.9	88017.4	146556	278143	271468	264194	--	1.00222	0.00897004	0.423719
MW0050800	C44H86O5	DG(21:0/i-20:0/0:0)	GL	DG	761.587	694.648	9.9967	M-2H+3Na	18.6843	MS2-MetDNA	0.541	rp	-	131802763	HMDB0094365	-	-	1.65935e+06	377107	1.68943e+06	1.01082e+06	982341	7.36972e+06	2.79828e+06	3.09948e+06	5.93761e+06	6.56415e+06	5.45028e+06	1.15234e+06	1.49279e+06	215152	224282	378005	186417	209710	1.21073e+06	232214	493672	1.29753e+06	988752	221312	3.24261e+06	352620	366168	362557	--	1.50639	0.0413618	0.359833
MW0118988	C9H13N	3-(2-Methylpropyl)pyridine	Heterocyclic compounds	Heterocyclic compounds	136.112	135.105	11.1633	M+H	0.323414	MS2-Insilico	0.7764	rp	-	61715	HMDB0037287	-	-	95319.7	81415.1	52075.7	132655	39478.5	35012.9	75379.6	125733	96262.7	192854	313747	230013	350287	118527	270514	148629	118028	133688	297011	62067.3	324283	277970	104536	122878	267420	265179	268887	280726	--	1.65505	0.000619907	2.25987
MW0012846	C26H50NO7P	1-Linoleoyl-sn-glycero-3-phosphorylcholine	GP	PC	564.305	519.332	7.698	M-H+2Na	3.8618	MS2-Search-DB	0.752	rp	-	11988421	HMDB0010386	-	-	13417.4	21234.9	6121.48	14982.5	13748	14595.3	25349.4	16096	19371.1	5240.47	79678.7	15181.8	28502.4	63716.5	14686	110625	12345.5	61279.3	12422.4	227023	28287.1	31991.5	111485	121637	23021.2	39288.5	39283.2	39038.5	--	1.65776	0.00800692	4.18178
[truncated: 2 more columns]
