# Supplementary material for: Linoleic acid promotes TF expression through PPAR-α, which leads to tumor progression in primary pulmonary lymphoepithelioma-like carcinoma
Source: Research Square preprint supplement (doi:10.21203/rs.3.rs-5704972/v1), 2025-01-10
Supplement: Supplementary file 13 [file af04ee3cb99a46e790695397.docx]

Table2. Identification of plasma proteome profiles as potential efficacy biomarkers for pLELC.

| **Protein** | **pLELC** | **NOC** | **Fold change** | **P value** |
| --- | --- | --- | --- | --- |
| | ATRN | | --- | | CP | | HP | | SERPINA3 | | APCS | | C9 | | AHSG | | TF | | HRG | | SERPINA5 | | CLEC3B | | ITIH1 | | CDH5 | | SAA4 | | BTD | | PGLYRP2 | | | 915438.6 | | --- | | 156394140.8 | | 457536.2688 | | 2755522.95 | | 529892.525 | | 8860281.6 | | 24628879.2 | | 749988.875 | | 7825187.4 | | 1371449.5 | | 25654605.6 | | 25569924.8 | | 6967165.3 | | 6169134.9 | | 8636641.3 | | 201612670.4 | | | 434074.425 | | --- | | 100992843.2 | | 303437.8031 | | 1854724.725 | | 356670.7031 | | 6380032.8 | | 18698623.6 | | 573778.925 | | 6223416.6 | | 1130521.25 | | 33463400 | | 34484727.6 | | 10061159 | | 9528187.1 | | 13802516.6 | | 461501824 | | | 2.108943875 | | --- | | 1.54856657 | | 1.507842016 | | 1.485677585 | | 1.485663163 | | 1.388751732 | | 1.317149311 | | 1.307104256 | | 1.257378045 | | 1.213112535 | | 0.766646713 | | 0.74148548 | | 0.692481383 | | 0.647461562 | | 0.625729463 | | 0.436862131 | | | 0.007232952 | | --- | | 0.029309541 | | 0.044046333 | | 0.007827108 | | 0.032368801 | | 0.036641473 | | 0.034297511 | | 0.037533467 | | 0.032028094 | | 0.003461194 | | 0.032041774 | | 0.007702156 | | 0.019014349 | | 0.005088764 | | 0.007700173 | | 0.017988102 | |
